# Supplementary material for: Cell–cell communications shape tumor microenvironment and predict clinical outcomes in clear cell renal carcinoma
Source: J Transl Med. 2023 Feb 10;21:113. doi: 10.1186/s12967-022-03858-x (PMC9921120; doi:10.1186/s12967-022-03858-x)
Supplement: Supplementary file 1 — Additional file 1: Markers of cell types used in this study. [file 12967_2022_3858_MOESM1_ESM.xlsx]

## Sheet: Table S1_1
Additional file 1: Table 1_1. Markers of cell types uesd in this study.
Cell type	Marker	References(PMID)
B cell	MS4A1	33711273
Cancer cell	CA9	33711273
Tcell CD4+	CD3E	33711273
Tcell CD4+	IL7R	34019793
Tcell CD8+	CD3E	33711273
Tcell CD8+	CD8A	33711273
Endothelial	PECAM1	32976798
Endothelial	VWF	32976798
Epithelial	UMOD	33711273
Epithelial	ALDOB	33711273
Fibroblast	ACTA2	32976798
Fibroblast	THY1	32976798
Mast cell	TPSAB1	33711273
Myeloid	LYZ	32976798
Myeloid	CD14	33861994
Myeloid	S100A8	32976798
Myeloid	S100A9	32976798
Myeloid	ITGAM	33711273
Nk cell	GNLY	33861994
Nk cell	NKG7	32976798
Nk cell	NCR1	33711273
Nk cell	NCAM1	33711273

## Sheet: Table S1_2
Additional file 1: Table S 1_2. Markers of Sub-clustering of cell types uesd in this study.
Cell type	Marker	References(PMID)
CD4+ Treg	FOXP3	33711273
CD4+ Treg	BATF	34019793
CD4+ Treg	CTLA4	31231035
CD4+ Treg	TIGIT	34019793
CD4+ NKT cell	IFITM1	30093597
CD4+ NKT cell	TGFB1	30093597
CD4+ NKT cell	FAM118A	30093597
CD4+ Cytotoxic T cell	PRF1	33711273
CD4+ Cytotoxic T cell	GZMB	33711273
CD4+ Cytotoxic T cell	GZMH	33861994
CD4+ Cytotoxic T cell	GNLY	33096020
CD4+ Cytotoxic T cell	NKG7	33096020
CD4+ Cytotoxic T cell	CD8A	33711273
CD4+ Cytotoxic T cell	CD8B	33711273
CD4+ Effector helper cell	CD40LG	33711273
CD4+ Effector helper cell	GZMA	33861994
CD4+ Effector helper cell	GZMK	33861994
CD4+ HSPA1A+ T cell	HSPA1A	33861994
CD4+ HSPA1A+ T cell	RPS4Y1	30093597
CD8+ Exhausted	LAG3	34019793
CD8+ Exhausted	HAVCR2	33711273
CD8+ Exhausted	TOX	34019793
CD8+ NK-like T cell	KLRB1	33861994
CD8+ NK-like T cell	FCGR3A	33711273
CD8+ NK-like T cell	GZMH	33861994
CD8+ NK-like T cell	GNLY	33861994
CD8+ Exhausted IEG	JUNB	33861994
CD8+ Exhausted IEG	FOS	33861994
CD8+ Exhausted IEG	ATF3	33861994
CD8+ Exhausted IEG	HSPA1A	33861994
CD8+ Exhausted IEG	DNAJB1	33861994
CD8+ Proliferating	MKI67	33861994
CD8+ Proliferating	TOP2A	33861994
CD8+ Proliferating	STMN1	33861994
Dendritic cell	CLEC10A	30595452
Dendritic cell	CD1C	30595452
Dendritic cell	FLT3	33711273
Classical Monocyte	S100A8	33711273
Classical Monocyte	S100A9	33711273
Classical Monocyte	CD14	33711273
Non−classical Monocyte	S100A8	33711273
Non−classical Monocyte	S100A9	33711273
Non−classical Monocyte	FCGR3A	33711273
TAM1	FN1	32976798
TAM1	SPP1	32976798
TAM2	FOLR2	32976798
TAM2	SEPP1	32976798
TAM3	MT1G	32976798
Macrophage Imflammatory	CXCL9	34343496
Macrophage Imflammatory	CXCL10	34343496
Macrophage Imflammatory	CXCL11	34343496
Macrophage Proliferating	MKI67	33711273
Macrophage Proliferating	TOP2A	33711273
