# Supplementary material for: Cell–cell communications shape tumor microenvironment and predict clinical outcomes in clear cell renal carcinoma
Source: J Transl Med. 2023 Feb 10;21:113. doi: 10.1186/s12967-022-03858-x (PMC9921120; doi:10.1186/s12967-022-03858-x)
Supplement: Supplementary file 2 — Additional file 2: Cell-cell communication molecules among all cell types identified by CellChat algorithm. [file 12967_2022_3858_MOESM2_ESM.xlsx]

## Sheet: VHL wild
	source	target	ligand	receptor	prob	pval	interaction_name	interaction_name_2	pathway_name	evidence
1	B Cells	Tumor	AREG	EGFR	0.00290804	0	AREG_EGFR	AREG - EGFR	EGF	KEGG: hsa04012
2	Endothelial Cells	Tumor	AREG	EGFR	0.00257163	0	AREG_EGFR	AREG - EGFR	EGF	KEGG: hsa04012
3	Mast Cells	Tumor	AREG	EGFR	0.021517	0	AREG_EGFR	AREG - EGFR	EGF	KEGG: hsa04012
4	Myeloid Cells	Tumor	AREG	EGFR	0.00331612	0	AREG_EGFR	AREG - EGFR	EGF	KEGG: hsa04012
5	NK Cells	Tumor	AREG	EGFR	0.0173928	0	AREG_EGFR	AREG - EGFR	EGF	KEGG: hsa04012
6	Myeloid Cells	Tumor	HBEGF	EGFR	0.00131226	0	HBEGF_EGFR	HBEGF - EGFR	EGF	KEGG: hsa04012
7	Fibroblasts	Fibroblasts	PDGFA	PDGFRB	0.00355639	0	PDGFA_PDGFRB	PDGFA - PDGFRB	PDGF	PMID: 15207812
8	Endothelial Cells	Fibroblasts	PDGFD	PDGFRB	0.0193334	0	PDGFD_PDGFRB	PDGFD - PDGFRB	PDGF	PMID: 15207812
9	Tumor	Endothelial Cells	VEGFA	FLT1	0.0856652	0	VEGFA_VEGFR1	VEGFA - VEGFR1	VEGF	KEGG: hsa04370; PMID: 16633338
10	Tumor	Endothelial Cells	VEGFA	KDR	0.0112269	0	VEGFA_VEGFR2	VEGFA - VEGFR2	VEGF	KEGG: hsa04370; PMID: 16633338
11	Fibroblasts	Endothelial Cells	PGF	FLT1	0.136076	0	PGF_VEGFR1	PGF - VEGFR1	VEGF	KEGG: hsa04370; PMID: 16633338
12	Tumor	Endothelial Cells	VEGFA	FLT1_KDR	0.0324098	0	VEGFA_VEGFR1R2	VEGFA - VEGFR1R2	VEGF	PMID: 16633338
13	Fibroblasts	B Cells	MIF	CD74_CXCR4	0.119869	0	MIF_CD74_CXCR4	MIF - (CD74+CXCR4)	MIF	PMID: 29637711; PMID: 24760155
14	Kidney Epithelium	B Cells	MIF	CD74_CXCR4	0.204273	0	MIF_CD74_CXCR4	MIF - (CD74+CXCR4)	MIF	PMID: 29637711; PMID: 24760155
15	Tumor	B Cells	MIF	CD74_CXCR4	0.291899	0	MIF_CD74_CXCR4	MIF - (CD74+CXCR4)	MIF	PMID: 29637711; PMID: 24760155
16	Kidney Epithelium	CD4+ Cells	MIF	CD74_CXCR4	0.161573	0	MIF_CD74_CXCR4	MIF - (CD74+CXCR4)	MIF	PMID: 29637711; PMID: 24760155
17	Tumor	CD4+ Cells	MIF	CD74_CXCR4	0.236322	0	MIF_CD74_CXCR4	MIF - (CD74+CXCR4)	MIF	PMID: 29637711; PMID: 24760155
18	Kidney Epithelium	CD8+ Cells	MIF	CD74_CXCR4	0.175383	0	MIF_CD74_CXCR4	MIF - (CD74+CXCR4)	MIF	PMID: 29637711; PMID: 24760155
19	Tumor	CD8+ Cells	MIF	CD74_CXCR4	0.254582	0	MIF_CD74_CXCR4	MIF - (CD74+CXCR4)	MIF	PMID: 29637711; PMID: 24760155
20	Kidney Epithelium	Endothelial Cells	MIF	CD74_CXCR4	0.10922	0	MIF_CD74_CXCR4	MIF - (CD74+CXCR4)	MIF	PMID: 29637711; PMID: 24760155
21	Tumor	Endothelial Cells	MIF	CD74_CXCR4	0.164501	0	MIF_CD74_CXCR4	MIF - (CD74+CXCR4)	MIF	PMID: 29637711; PMID: 24760155
22	Tumor	Fibroblasts	MIF	CD74_CXCR4	0.121118	0	MIF_CD74_CXCR4	MIF - (CD74+CXCR4)	MIF	PMID: 29637711; PMID: 24760155
23	Tumor	Mast Cells	MIF	CD74_CXCR4	0.128649	0	MIF_CD74_CXCR4	MIF - (CD74+CXCR4)	MIF	PMID: 29637711; PMID: 24760155
24	Fibroblasts	Myeloid Cells	MIF	CD74_CXCR4	0.114222	0	MIF_CD74_CXCR4	MIF - (CD74+CXCR4)	MIF	PMID: 29637711; PMID: 24760155
25	Kidney Epithelium	Myeloid Cells	MIF	CD74_CXCR4	0.195534	0	MIF_CD74_CXCR4	MIF - (CD74+CXCR4)	MIF	PMID: 29637711; PMID: 24760155
26	Tumor	Myeloid Cells	MIF	CD74_CXCR4	0.280734	0	MIF_CD74_CXCR4	MIF - (CD74+CXCR4)	MIF	PMID: 29637711; PMID: 24760155
27	Kidney Epithelium	NK Cells	MIF	CD74_CXCR4	0.153862	0	MIF_CD74_CXCR4	MIF - (CD74+CXCR4)	MIF	PMID: 29637711; PMID: 24760155
28	Tumor	NK Cells	MIF	CD74_CXCR4	0.226006	0	MIF_CD74_CXCR4	MIF - (CD74+CXCR4)	MIF	PMID: 29637711; PMID: 24760155
29	Tumor	Tumor	MIF	CD74_CXCR4	0.135918	0	MIF_CD74_CXCR4	MIF - (CD74+CXCR4)	MIF	PMID: 29637711; PMID: 24760155
30	Kidney Epithelium	B Cells	MIF	CD74_CD44	0.11471	0	MIF_CD74_CD44	MIF - (CD74+CD44)	MIF	PMID: 29637711; PMID: 26175090
31	Tumor	B Cells	MIF	CD74_CD44	0.172233	0	MIF_CD74_CD44	MIF - (CD74+CD44)	MIF	PMID: 29637711; PMID: 26175090
32	Kidney Epithelium	CD4+ Cells	MIF	CD74_CD44	0.109834	0	MIF_CD74_CD44	MIF - (CD74+CD44)	MIF	PMID: 29637711; PMID: 26175090
33	Tumor	CD4+ Cells	MIF	CD74_CD44	0.165368	0	MIF_CD74_CD44	MIF - (CD74+CD44)	MIF	PMID: 29637711; PMID: 26175090
34	Fibroblasts	CD8+ Cells	MIF	CD74_CD44	0.0682291	0	MIF_CD74_CD44	MIF - (CD74+CD44)	MIF	PMID: 29637711; PMID: 26175090
35	Kidney Epithelium	CD8+ Cells	MIF	CD74_CD44	0.121283	0	MIF_CD74_CD44	MIF - (CD74+CD44)	MIF	PMID: 29637711; PMID: 26175090
36	Tumor	CD8+ Cells	MIF	CD74_CD44	0.181426	0	MIF_CD74_CD44	MIF - (CD74+CD44)	MIF	PMID: 29637711; PMID: 26175090
37	Tumor	Fibroblasts	MIF	CD74_CD44	0.0751035	0	MIF_CD74_CD44	MIF - (CD74+CD44)	MIF	PMID: 29637711; PMID: 26175090
38	Kidney Epithelium	Mast Cells	MIF	CD74_CD44	0.0986976	0	MIF_CD74_CD44	MIF - (CD74+CD44)	MIF	PMID: 29637711; PMID: 26175090
39	Tumor	Mast Cells	MIF	CD74_CD44	0.149547	0	MIF_CD74_CD44	MIF - (CD74+CD44)	MIF	PMID: 29637711; PMID: 26175090
40	Fibroblasts	Myeloid Cells	MIF	CD74_CD44	0.0699641	0	MIF_CD74_CD44	MIF - (CD74+CD44)	MIF	PMID: 29637711; PMID: 26175090
41	Kidney Epithelium	Myeloid Cells	MIF	CD74_CD44	0.124187	0	MIF_CD74_CD44	MIF - (CD74+CD44)	MIF	PMID: 29637711; PMID: 26175090
42	Tumor	Myeloid Cells	MIF	CD74_CD44	0.185466	0	MIF_CD74_CD44	MIF - (CD74+CD44)	MIF	PMID: 29637711; PMID: 26175090
43	Kidney Epithelium	NK Cells	MIF	CD74_CD44	0.0858702	0	MIF_CD74_CD44	MIF - (CD74+CD44)	MIF	PMID: 29637711; PMID: 26175090
44	Tumor	NK Cells	MIF	CD74_CD44	0.131072	0	MIF_CD74_CD44	MIF - (CD74+CD44)	MIF	PMID: 29637711; PMID: 26175090
45	Mast Cells	Myeloid Cells	CSF1	CSF1R	0.0112055	0	CSF1_CSF1R	CSF1 - CSF1R	CSF	KEGG: hsa04060
46	B Cells	Myeloid Cells	IL16	CD4	0.00201754	0	IL16_CD4	IL16 - CD4	IL16	KEGG: hsa04060
47	Fibroblasts	Fibroblasts	NGF	NGFR	0.00138845	0	NGF_NGFR	NGF - NGFR	NGF	KEGG: hsa04060
48	Myeloid Cells	Tumor	TNFSF12	TNFRSF12A	0.000794704	0	TNFSF12_TNFRSF12A	TNFSF12 - TNFRSF12A	TWEAK	KEGG: hsa04060
49	Tumor	B Cells	CD70	CD27	0.00275471	0	CD70_CD27	CD70 - CD27	CD70	KEGG: hsa04060
50	Tumor	CD4+ Cells	CD70	CD27	0.00322979	0	CD70_CD27	CD70 - CD27	CD70	KEGG: hsa04060
51	Tumor	CD8+ Cells	CD70	CD27	0.0110994	0	CD70_CD27	CD70 - CD27	CD70	KEGG: hsa04060
52	Myeloid Cells	B Cells	TNFSF13B	TNFRSF13C	0.01831	0	TNFSF13B_TNFRSF13C	TNFSF13B - TNFRSF13C	BAFF	KEGG: hsa04060
53	CD4+ Cells	Endothelial Cells	CD40LG	ITGA5_ITGB1	0.0118592	0	CD40LG_ITGA5_ITGB1	CD40LG - (ITGA5+ITGB1)	CD40	PMID: 28676852
54	CD4+ Cells	Myeloid Cells	CD40LG	ITGAM_ITGB2	0.00534914	0	CD40LG_ITGAM_ITGB2	CD40LG - (ITGAM+ITGB2)	CD40	PMID: 28676852
55	Kidney Epithelium	B Cells	SPP1	CD44	0.0450985	0	SPP1_CD44	SPP1 - CD44	SPP1	PMID: 21907263
56	Myeloid Cells	B Cells	SPP1	CD44	0.0107517	0.01	SPP1_CD44	SPP1 - CD44	SPP1	PMID: 21907263
57	Tumor	B Cells	SPP1	CD44	0.0462781	0	SPP1_CD44	SPP1 - CD44	SPP1	PMID: 21907263
58	Kidney Epithelium	CD4+ Cells	SPP1	CD44	0.0785845	0	SPP1_CD44	SPP1 - CD44	SPP1	PMID: 21907263
59	Myeloid Cells	CD4+ Cells	SPP1	CD44	0.0192489	0	SPP1_CD44	SPP1 - CD44	SPP1	PMID: 21907263
60	Tumor	CD4+ Cells	SPP1	CD44	0.080566	0	SPP1_CD44	SPP1 - CD44	SPP1	PMID: 21907263
61	Kidney Epithelium	CD8+ Cells	SPP1	CD44	0.0725437	0	SPP1_CD44	SPP1 - CD44	SPP1	PMID: 21907263
62	Myeloid Cells	CD8+ Cells	SPP1	CD44	0.0176817	0	SPP1_CD44	SPP1 - CD44	SPP1	PMID: 21907263
63	Tumor	CD8+ Cells	SPP1	CD44	0.0743852	0	SPP1_CD44	SPP1 - CD44	SPP1	PMID: 21907263
64	Kidney Epithelium	Fibroblasts	SPP1	CD44	0.0165589	0	SPP1_CD44	SPP1 - CD44	SPP1	PMID: 21907263
65	Tumor	Fibroblasts	SPP1	CD44	0.0170053	0	SPP1_CD44	SPP1 - CD44	SPP1	PMID: 21907263
66	Kidney Epithelium	Mast Cells	SPP1	CD44	0.0681732	0	SPP1_CD44	SPP1 - CD44	SPP1	PMID: 21907263
67	Myeloid Cells	Mast Cells	SPP1	CD44	0.0165575	0	SPP1_CD44	SPP1 - CD44	SPP1	PMID: 21907263
68	Tumor	Mast Cells	SPP1	CD44	0.0699121	0	SPP1_CD44	SPP1 - CD44	SPP1	PMID: 21907263
69	Kidney Epithelium	Myeloid Cells	SPP1	CD44	0.0477302	0	SPP1_CD44	SPP1 - CD44	SPP1	PMID: 21907263
70	Myeloid Cells	Myeloid Cells	SPP1	CD44	0.011403	0	SPP1_CD44	SPP1 - CD44	SPP1	PMID: 21907263
71	Tumor	Myeloid Cells	SPP1	CD44	0.0489751	0	SPP1_CD44	SPP1 - CD44	SPP1	PMID: 21907263
72	Kidney Epithelium	NK Cells	SPP1	CD44	0.0454797	0	SPP1_CD44	SPP1 - CD44	SPP1	PMID: 21907263
73	Myeloid Cells	NK Cells	SPP1	CD44	0.0108458	0	SPP1_CD44	SPP1 - CD44	SPP1	PMID: 21907263
74	Tumor	NK Cells	SPP1	CD44	0.0466688	0	SPP1_CD44	SPP1 - CD44	SPP1	PMID: 21907263
75	B Cells	Fibroblasts	SPP1	ITGAV_ITGB1	0.000465894	0	SPP1_ITGAV_ITGB1	SPP1 - (ITGAV+ITGB1)	SPP1	PMID: 21907263
76	Kidney Epithelium	Fibroblasts	SPP1	ITGAV_ITGB1	0.0426115	0	SPP1_ITGAV_ITGB1	SPP1 - (ITGAV+ITGB1)	SPP1	PMID: 21907263
77	Myeloid Cells	Fibroblasts	SPP1	ITGAV_ITGB1	0.0101386	0	SPP1_ITGAV_ITGB1	SPP1 - (ITGAV+ITGB1)	SPP1	PMID: 21907263
78	Tumor	Fibroblasts	SPP1	ITGAV_ITGB1	0.043729	0	SPP1_ITGAV_ITGB1	SPP1 - (ITGAV+ITGB1)	SPP1	PMID: 21907263
79	B Cells	Myeloid Cells	SPP1	ITGAV_ITGB1	0.000183887	0	SPP1_ITGAV_ITGB1	SPP1 - (ITGAV+ITGB1)	SPP1	PMID: 21907263
80	Kidney Epithelium	Myeloid Cells	SPP1	ITGAV_ITGB1	0.0172591	0	SPP1_ITGAV_ITGB1	SPP1 - (ITGAV+ITGB1)	SPP1	PMID: 21907263
81	Myeloid Cells	Myeloid Cells	SPP1	ITGAV_ITGB1	0.00402527	0	SPP1_ITGAV_ITGB1	SPP1 - (ITGAV+ITGB1)	SPP1	PMID: 21907263
82	Tumor	Myeloid Cells	SPP1	ITGAV_ITGB1	0.0177241	0	SPP1_ITGAV_ITGB1	SPP1 - (ITGAV+ITGB1)	SPP1	PMID: 21907263
83	B Cells	CD8+ Cells	SPP1	ITGA4_ITGB1	0.000376342	0	SPP1_ITGA4_ITGB1	SPP1 - (ITGA4+ITGB1)	SPP1	PMID: 21907263
84	Kidney Epithelium	CD8+ Cells	SPP1	ITGA4_ITGB1	0.0347022	0	SPP1_ITGA4_ITGB1	SPP1 - (ITGA4+ITGB1)	SPP1	PMID: 21907263
85	Myeloid Cells	CD8+ Cells	SPP1	ITGA4_ITGB1	0.00820509	0	SPP1_ITGA4_ITGB1	SPP1 - (ITGA4+ITGB1)	SPP1	PMID: 21907263
86	Tumor	CD8+ Cells	SPP1	ITGA4_ITGB1	0.03562	0	SPP1_ITGA4_ITGB1	SPP1 - (ITGA4+ITGB1)	SPP1	PMID: 21907263
87	Kidney Epithelium	Myeloid Cells	SPP1	ITGA4_ITGB1	0.0195212	0	SPP1_ITGA4_ITGB1	SPP1 - (ITGA4+ITGB1)	SPP1	PMID: 21907263
88	Myeloid Cells	Myeloid Cells	SPP1	ITGA4_ITGB1	0.00456088	0	SPP1_ITGA4_ITGB1	SPP1 - (ITGA4+ITGB1)	SPP1	PMID: 21907263
89	Tumor	Myeloid Cells	SPP1	ITGA4_ITGB1	0.0200458	0	SPP1_ITGA4_ITGB1	SPP1 - (ITGA4+ITGB1)	SPP1	PMID: 21907263
90	Kidney Epithelium	NK Cells	SPP1	ITGA4_ITGB1	0.0194527	0	SPP1_ITGA4_ITGB1	SPP1 - (ITGA4+ITGB1)	SPP1	PMID: 21907263
91	Myeloid Cells	NK Cells	SPP1	ITGA4_ITGB1	0.00454465	0	SPP1_ITGA4_ITGB1	SPP1 - (ITGA4+ITGB1)	SPP1	PMID: 21907263
92	Tumor	NK Cells	SPP1	ITGA4_ITGB1	0.0199756	0	SPP1_ITGA4_ITGB1	SPP1 - (ITGA4+ITGB1)	SPP1	PMID: 21907263
93	B Cells	Endothelial Cells	SPP1	ITGA5_ITGB1	0.000536859	0	SPP1_ITGA5_ITGB1	SPP1 - (ITGA5+ITGB1)	SPP1	PMID: 21907263
94	Kidney Epithelium	Endothelial Cells	SPP1	ITGA5_ITGB1	0.0487887	0	SPP1_ITGA5_ITGB1	SPP1 - (ITGA5+ITGB1)	SPP1	PMID: 21907263
95	Myeloid Cells	Endothelial Cells	SPP1	ITGA5_ITGB1	0.0116657	0	SPP1_ITGA5_ITGB1	SPP1 - (ITGA5+ITGB1)	SPP1	PMID: 21907263
96	Tumor	Endothelial Cells	SPP1	ITGA5_ITGB1	0.0500597	0	SPP1_ITGA5_ITGB1	SPP1 - (ITGA5+ITGB1)	SPP1	PMID: 21907263
97	Fibroblasts	Endothelial Cells	NAMPT	INSR	0.0131527	0	NAMPT_INSR	NAMPT - INSR	VISFATIN	PMID: 28490838
98	Mast Cells	Endothelial Cells	NAMPT	INSR	0.0271654	0	NAMPT_INSR	NAMPT - INSR	VISFATIN	PMID: 28490838
99	Myeloid Cells	Endothelial Cells	NAMPT	INSR	0.109678	0	NAMPT_INSR	NAMPT - INSR	VISFATIN	PMID: 28490838
100	Tumor	Endothelial Cells	NAMPT	INSR	0.0156605	0	NAMPT_INSR	NAMPT - INSR	VISFATIN	PMID: 28490838
101	Fibroblasts	Fibroblasts	NAMPT	INSR	0.000796971	0.01	NAMPT_INSR	NAMPT - INSR	VISFATIN	PMID: 28490838
102	Mast Cells	Fibroblasts	NAMPT	INSR	0.00166831	0	NAMPT_INSR	NAMPT - INSR	VISFATIN	PMID: 28490838
103	Myeloid Cells	Fibroblasts	NAMPT	INSR	0.00731823	0	NAMPT_INSR	NAMPT - INSR	VISFATIN	PMID: 28490838
104	Tumor	Fibroblasts	NAMPT	INSR	0.000951203	0.01	NAMPT_INSR	NAMPT - INSR	VISFATIN	PMID: 28490838
105	Fibroblasts	Myeloid Cells	NAMPT	INSR	0.000986474	0	NAMPT_INSR	NAMPT - INSR	VISFATIN	PMID: 28490838
106	Mast Cells	Myeloid Cells	NAMPT	INSR	0.00206457	0	NAMPT_INSR	NAMPT - INSR	VISFATIN	PMID: 28490838
107	Myeloid Cells	Myeloid Cells	NAMPT	INSR	0.00904431	0	NAMPT_INSR	NAMPT - INSR	VISFATIN	PMID: 28490838
108	Tumor	Myeloid Cells	NAMPT	INSR	0.00117734	0	NAMPT_INSR	NAMPT - INSR	VISFATIN	PMID: 28490838
109	Fibroblasts	Tumor	NAMPT	INSR	0.000884146	0	NAMPT_INSR	NAMPT - INSR	VISFATIN	PMID: 28490838
110	Mast Cells	Tumor	NAMPT	INSR	0.00185061	0	NAMPT_INSR	NAMPT - INSR	VISFATIN	PMID: 28490838
111	Myeloid Cells	Tumor	NAMPT	INSR	0.00811293	0	NAMPT_INSR	NAMPT - INSR	VISFATIN	PMID: 28490838
112	Tumor	Tumor	NAMPT	INSR	0.00105523	0	NAMPT_INSR	NAMPT - INSR	VISFATIN	PMID: 28490838
113	Fibroblasts	Endothelial Cells	NAMPT	ITGA5_ITGB1	0.00474814	0	NAMPT_ITGA5_ITGB1	NAMPT - (ITGA5+ITGB1)	VISFATIN	PMID: 28490838
114	Mast Cells	Endothelial Cells	NAMPT	ITGA5_ITGB1	0.00989653	0	NAMPT_ITGA5_ITGB1	NAMPT - (ITGA5+ITGB1)	VISFATIN	PMID: 28490838
115	Myeloid Cells	Endothelial Cells	NAMPT	ITGA5_ITGB1	0.0422335	0	NAMPT_ITGA5_ITGB1	NAMPT - (ITGA5+ITGB1)	VISFATIN	PMID: 28490838
116	Tumor	Endothelial Cells	NAMPT	ITGA5_ITGB1	0.00566268	0	NAMPT_ITGA5_ITGB1	NAMPT - (ITGA5+ITGB1)	VISFATIN	PMID: 28490838
117	Endothelial Cells	Endothelial Cells	ANGPTL2	ITGA5_ITGB1	0.00782419	0	ANGPTL2_ITGA5_ITGB1	ANGPTL2 - (ITGA5+ITGB1)	ANGPTL	PMID: 24478758
118	Endothelial Cells	Myeloid Cells	ANGPTL2	LILRB3	0.00198957	0	ANGPTL2_PIRB	ANGPTL2 - PIRB	ANGPTL	PMID: 24478758
119	Fibroblasts	Endothelial Cells	ANGPTL4	ITGA5_ITGB1	0.0107301	0	ANGPTL4_ITGA5_ITGB1	ANGPTL4 - (ITGA5+ITGB1)	ANGPTL	PMID: 30049845
120	Tumor	Endothelial Cells	ANGPTL4	ITGA5_ITGB1	0.0701768	0	ANGPTL4_ITGA5_ITGB1	ANGPTL4 - (ITGA5+ITGB1)	ANGPTL	PMID: 30049845
121	Fibroblasts	Endothelial Cells	ANGPTL4	CDH5	0.00483705	0	ANGPTL4_CDH5	ANGPTL4 - CDH5	ANGPTL	PMID: 30049845
122	Tumor	Endothelial Cells	ANGPTL4	CDH5	0.0327148	0	ANGPTL4_CDH5	ANGPTL4 - CDH5	ANGPTL	PMID: 30049845
123	Fibroblasts	Fibroblasts	ANGPTL4	SDC2	0.00360337	0	ANGPTL4_SDC2	ANGPTL4 - SDC2	ANGPTL	PMID: 29017031
124	Tumor	Fibroblasts	ANGPTL4	SDC2	0.0245463	0	ANGPTL4_SDC2	ANGPTL4 - SDC2	ANGPTL	PMID: 29017031
125	Fibroblasts	Tumor	ANGPTL4	SDC2	0.00199912	0	ANGPTL4_SDC2	ANGPTL4 - SDC2	ANGPTL	PMID: 29017031
126	Tumor	Tumor	ANGPTL4	SDC2	0.0137468	0	ANGPTL4_SDC2	ANGPTL4 - SDC2	ANGPTL	PMID: 29017031
127	Fibroblasts	Tumor	ANGPTL4	SDC4	0.00136207	0	ANGPTL4_SDC4	ANGPTL4 - SDC4	ANGPTL	PMID: 29017031
128	Tumor	Tumor	ANGPTL4	SDC4	0.00940142	0	ANGPTL4_SDC4	ANGPTL4 - SDC4	ANGPTL	PMID: 29017031
129	Endothelial Cells	Endothelial Cells	ANGPT2	ITGA5_ITGB1	0.0311183	0	ANGPT2_ITGA5_ITGB1	ANGPT2 - (ITGA5+ITGB1)	ANGPT	PMID: 20651738; PMID: 25635707
130	Fibroblasts	Endothelial Cells	ANGPT2	ITGA5_ITGB1	0.00606713	0	ANGPT2_ITGA5_ITGB1	ANGPT2 - (ITGA5+ITGB1)	ANGPT	PMID: 20651738; PMID: 25635707
131	Fibroblasts	Fibroblasts	MDK	SDC2	0.00148618	0	MDK_SDC2	MDK - SDC2	MK	PMID: 28356350
132	Fibroblasts	Tumor	MDK	SDC2	0.000823745	0	MDK_SDC2	MDK - SDC2	MK	PMID: 28356350
133	Fibroblasts	Tumor	MDK	SDC4	0.000561036	0	MDK_SDC4	MDK - SDC4	MK	PMID: 28356350
134	Fibroblasts	CD8+ Cells	MDK	ITGA4_ITGB1	0.00311909	0	MDK_ITGA4_ITGB1	MDK - (ITGA4+ITGB1)	MK	PMID: 28356350
135	Fibroblasts	Myeloid Cells	MDK	ITGA4_ITGB1	0.00172984	0	MDK_ITGA4_ITGB1	MDK - (ITGA4+ITGB1)	MK	PMID: 28356350
136	Fibroblasts	NK Cells	MDK	ITGA4_ITGB1	0.00172366	0	MDK_ITGA4_ITGB1	MDK - (ITGA4+ITGB1)	MK	PMID: 28356350
137	Fibroblasts	Endothelial Cells	MDK	ITGA6_ITGB1	0.00878557	0	MDK_ITGA6_ITGB1	MDK - (ITGA6+ITGB1)	MK	PMID: 28356350
138	Fibroblasts	Myeloid Cells	MDK	LRP1	0.000877645	0	MDK_LRP1	MDK - LRP1	MK	PMID: 28356350
139	Fibroblasts	B Cells	MDK	NCL	0.00181564	0	MDK_NCL	MDK - NCL	MK	PMID: 28356350
140	Fibroblasts	CD4+ Cells	MDK	NCL	0.00198444	0	MDK_NCL	MDK - NCL	MK	PMID: 28356350
141	Fibroblasts	CD8+ Cells	MDK	NCL	0.00213206	0	MDK_NCL	MDK - NCL	MK	PMID: 28356350
142	Fibroblasts	Endothelial Cells	MDK	NCL	0.00175828	0	MDK_NCL	MDK - NCL	MK	PMID: 28356350
143	Fibroblasts	Fibroblasts	MDK	NCL	0.00446131	0	MDK_NCL	MDK - NCL	MK	PMID: 28356350
144	Fibroblasts	Kidney Epithelium	MDK	NCL	0.00134163	0	MDK_NCL	MDK - NCL	MK	PMID: 28356350
145	Fibroblasts	Mast Cells	MDK	NCL	0.00463395	0	MDK_NCL	MDK - NCL	MK	PMID: 28356350
146	Fibroblasts	Myeloid Cells	MDK	NCL	0.00437517	0	MDK_NCL	MDK - NCL	MK	PMID: 28356350
147	Fibroblasts	NK Cells	MDK	NCL	0.00219739	0	MDK_NCL	MDK - NCL	MK	PMID: 28356350
148	Fibroblasts	Tumor	MDK	NCL	0.0011076	0	MDK_NCL	MDK - NCL	MK	PMID: 28356350
149	Fibroblasts	Fibroblasts	PTN	SDC2	0.00345083	0	PTN_SDC2	PTN - SDC2	PTN	PMID: 28356350; PMID: 25620911
150	Fibroblasts	Tumor	PTN	SDC2	0.00191436	0	PTN_SDC2	PTN - SDC2	PTN	PMID: 28356350; PMID: 25620911
151	Fibroblasts	Tumor	PTN	SDC4	0.00130429	0	PTN_SDC4	PTN - SDC4	PTN	PMID: 28356350; PMID: 25620911
152	Fibroblasts	B Cells	PTN	NCL	0.00421397	0	PTN_NCL	PTN - NCL	PTN	PMID: 28356350; PMID: 25620911
153	Fibroblasts	CD4+ Cells	PTN	NCL	0.0046047	0	PTN_NCL	PTN - NCL	PTN	PMID: 28356350; PMID: 25620911
154	Fibroblasts	CD8+ Cells	PTN	NCL	0.00494629	0	PTN_NCL	PTN - NCL	PTN	PMID: 28356350; PMID: 25620911
155	Fibroblasts	Endothelial Cells	PTN	NCL	0.00408114	0	PTN_NCL	PTN - NCL	PTN	PMID: 28356350; PMID: 25620911
156	Fibroblasts	Fibroblasts	PTN	NCL	0.0103182	0	PTN_NCL	PTN - NCL	PTN	PMID: 28356350; PMID: 25620911
157	Fibroblasts	Kidney Epithelium	PTN	NCL	0.00311577	0	PTN_NCL	PTN - NCL	PTN	PMID: 28356350; PMID: 25620911
158	Fibroblasts	Mast Cells	PTN	NCL	0.0107151	0	PTN_NCL	PTN - NCL	PTN	PMID: 28356350; PMID: 25620911
159	Fibroblasts	Myeloid Cells	PTN	NCL	0.0101202	0	PTN_NCL	PTN - NCL	PTN	PMID: 28356350; PMID: 25620911
160	Fibroblasts	NK Cells	PTN	NCL	0.00509739	0	PTN_NCL	PTN - NCL	PTN	PMID: 28356350; PMID: 25620911
161	Fibroblasts	Tumor	PTN	NCL	0.00257306	0	PTN_NCL	PTN - NCL	PTN	PMID: 28356350; PMID: 25620911
162	Myeloid Cells	Myeloid Cells	C3	C3AR1	0.0264974	0	C3_C3AR1	C3 - C3AR1	COMPLEMENT	KEGG: hsa04080
163	Tumor	Myeloid Cells	C3	C3AR1	0.00738845	0	C3_C3AR1	C3 - C3AR1	COMPLEMENT	KEGG: hsa04080
164	Myeloid Cells	Myeloid Cells	C3	ITGAM_ITGB2	0.0153047	0	C3_ITGAM_ITGB2	C3 - (ITGAM+ITGB2)	COMPLEMENT	PMID: 16234578
165	Tumor	Myeloid Cells	C3	ITGAM_ITGB2	0.00423242	0	C3_ITGAM_ITGB2	C3 - (ITGAM+ITGB2)	COMPLEMENT	PMID: 16234578
166	Myeloid Cells	Myeloid Cells	C3	ITGAX_ITGB2	0.0202231	0	C3_ITGAX_ITGB2	C3 - (ITGAX+ITGB2)	COMPLEMENT	PMID: 16234578
167	Tumor	Myeloid Cells	C3	ITGAX_ITGB2	0.00561284	0	C3_ITGAX_ITGB2	C3 - (ITGAX+ITGB2)	COMPLEMENT	PMID: 16234578
168	Tumor	Endothelial Cells	EDN1	EDNRB	0.00549168	0	EDN1_EDNRB	EDN1 - EDNRB	EDN	KEGG: hsa04080
169	Tumor	Fibroblasts	EDN1	EDNRB	0.00119782	0	EDN1_EDNRB	EDN1 - EDNRB	EDN	KEGG: hsa04080
170	CD4+ Cells	Endothelial Cells	GZMA	F2R	0.00754293	0	GZMA_F2R	GZMA - F2R	PARs	KEGG: hsa04080
171	CD8+ Cells	Endothelial Cells	GZMA	F2R	0.031674	0	GZMA_F2R	GZMA - F2R	PARs	KEGG: hsa04080
172	NK Cells	Endothelial Cells	GZMA	F2R	0.0307322	0	GZMA_F2R	GZMA - F2R	PARs	KEGG: hsa04080
173	CD4+ Cells	Fibroblasts	GZMA	F2R	0.00646976	0	GZMA_F2R	GZMA - F2R	PARs	KEGG: hsa04080
174	CD8+ Cells	Fibroblasts	GZMA	F2R	0.0272619	0	GZMA_F2R	GZMA - F2R	PARs	KEGG: hsa04080
175	NK Cells	Fibroblasts	GZMA	F2R	0.0264477	0	GZMA_F2R	GZMA - F2R	PARs	KEGG: hsa04080
176	CD4+ Cells	Endothelial Cells	GZMA	F2RL3	0.00768606	0	GZMA_F2RL3	GZMA - F2RL3	PARs	KEGG: hsa04080
177	CD8+ Cells	Endothelial Cells	GZMA	F2RL3	0.0322601	0	GZMA_F2RL3	GZMA - F2RL3	PARs	KEGG: hsa04080
178	NK Cells	Endothelial Cells	GZMA	F2RL3	0.0313015	0	GZMA_F2RL3	GZMA - F2RL3	PARs	KEGG: hsa04080
179	Endothelial Cells	Endothelial Cells	ADM	CALCRL	0.0166903	0	ADM_CALCRL	ADM - CALCRL	CALCR	KEGG: hsa04080
180	Tumor	Endothelial Cells	ADM	CALCRL	0.0336136	0	ADM_CALCRL	ADM - CALCRL	CALCR	KEGG: hsa04080
181	CD4+ Cells	Myeloid Cells	ANXA1	FPR1	0.0401115	0	ANXA1_FPR1	ANXA1 - FPR1	ANNEXIN	PMID: 23230437
182	CD8+ Cells	Myeloid Cells	ANXA1	FPR1	0.0130528	0	ANXA1_FPR1	ANXA1 - FPR1	ANNEXIN	PMID: 23230437
183	Endothelial Cells	Myeloid Cells	ANXA1	FPR1	0.00940304	0	ANXA1_FPR1	ANXA1 - FPR1	ANNEXIN	PMID: 23230437
184	Fibroblasts	Myeloid Cells	ANXA1	FPR1	0.00819509	0	ANXA1_FPR1	ANXA1 - FPR1	ANNEXIN	PMID: 23230437
185	Kidney Epithelium	Myeloid Cells	ANXA1	FPR1	0.00397542	0	ANXA1_FPR1	ANXA1 - FPR1	ANNEXIN	PMID: 23230437
186	Mast Cells	Myeloid Cells	ANXA1	FPR1	0.066133	0	ANXA1_FPR1	ANXA1 - FPR1	ANNEXIN	PMID: 23230437
187	Myeloid Cells	Myeloid Cells	ANXA1	FPR1	0.0331849	0	ANXA1_FPR1	ANXA1 - FPR1	ANNEXIN	PMID: 23230437
188	NK Cells	Myeloid Cells	ANXA1	FPR1	0.0358375	0	ANXA1_FPR1	ANXA1 - FPR1	ANNEXIN	PMID: 23230437
189	Tumor	Myeloid Cells	ANXA1	FPR1	0.00935243	0	ANXA1_FPR1	ANXA1 - FPR1	ANNEXIN	PMID: 23230437
190	Endothelial Cells	Fibroblasts	GAS6	AXL	0.00432427	0	GAS6_AXL	GAS6 - AXL	GAS	PMID: 27801848
191	Fibroblasts	Fibroblasts	GAS6	AXL	0.00351091	0	GAS6_AXL	GAS6 - AXL	GAS	PMID: 27801848
192	Endothelial Cells	Myeloid Cells	GAS6	AXL	0.00279083	0	GAS6_AXL	GAS6 - AXL	GAS	PMID: 27801848
193	Fibroblasts	Myeloid Cells	GAS6	AXL	0.00226524	0	GAS6_AXL	GAS6 - AXL	GAS	PMID: 27801848
194	B Cells	Fibroblasts	GRN	SORT1	0.00104567	0	GRN_SORT1	GRN - SORT1	GRN	PMID: 29555433
195	Endothelial Cells	Fibroblasts	GRN	SORT1	0.00720504	0	GRN_SORT1	GRN - SORT1	GRN	PMID: 29555433
196	Fibroblasts	Fibroblasts	GRN	SORT1	0.00465444	0	GRN_SORT1	GRN - SORT1	GRN	PMID: 29555433
197	Kidney Epithelium	Fibroblasts	GRN	SORT1	0.00136644	0	GRN_SORT1	GRN - SORT1	GRN	PMID: 29555433
198	Mast Cells	Fibroblasts	GRN	SORT1	0.000456682	0	GRN_SORT1	GRN - SORT1	GRN	PMID: 29555433
199	Myeloid Cells	Fibroblasts	GRN	SORT1	0.0137041	0	GRN_SORT1	GRN - SORT1	GRN	PMID: 29555433
200	Tumor	Fibroblasts	GRN	SORT1	0.00171276	0	GRN_SORT1	GRN - SORT1	GRN	PMID: 29555433
201	Myeloid Cells	B Cells	LGALS9	PTPRC	0.0203839	0	LGALS9_CD45	LGALS9 - CD45	GALECTIN	PMID: 30120235
202	Myeloid Cells	CD4+ Cells	LGALS9	PTPRC	0.046548	0	LGALS9_CD45	LGALS9 - CD45	GALECTIN	PMID: 30120235
203	Myeloid Cells	CD8+ Cells	LGALS9	PTPRC	0.0510126	0	LGALS9_CD45	LGALS9 - CD45	GALECTIN	PMID: 30120235
204	Myeloid Cells	Mast Cells	LGALS9	PTPRC	0.00756991	0	LGALS9_CD45	LGALS9 - CD45	GALECTIN	PMID: 30120235
205	Myeloid Cells	Myeloid Cells	LGALS9	PTPRC	0.0379341	0	LGALS9_CD45	LGALS9 - CD45	GALECTIN	PMID: 30120235
206	Myeloid Cells	NK Cells	LGALS9	PTPRC	0.0437529	0	LGALS9_CD45	LGALS9 - CD45	GALECTIN	PMID: 30120235
207	Tumor	Fibroblasts	PROS1	AXL	0.00226897	0	PROS1_AXL	PROS1 - AXL	PROS	PMID: 29531161
208	Tumor	Myeloid Cells	PROS1	AXL	0.0014633	0	PROS1_AXL	PROS1 - AXL	PROS	PMID: 29531161
209	Myeloid Cells	Myeloid Cells	LGALS9	HAVCR2	0.0141397	0	LGALS9_HAVCR2	LGALS9 - HAVCR2	GALECTIN	PMID: 27192565
210	Myeloid Cells	NK Cells	LGALS9	HAVCR2	0.00748945	0	LGALS9_HAVCR2	LGALS9 - HAVCR2	GALECTIN	PMID: 27192565
211	Myeloid Cells	B Cells	LGALS9	CD44	0.0188224	0	LGALS9_CD44	LGALS9 - CD44	GALECTIN	PMID: 25065622
212	Myeloid Cells	CD4+ Cells	LGALS9	CD44	0.0334822	0	LGALS9_CD44	LGALS9 - CD44	GALECTIN	PMID: 25065622
213	Myeloid Cells	CD8+ Cells	LGALS9	CD44	0.0307925	0	LGALS9_CD44	LGALS9 - CD44	GALECTIN	PMID: 25065622
214	Myeloid Cells	Fibroblasts	LGALS9	CD44	0.00679275	0	LGALS9_CD44	LGALS9 - CD44	GALECTIN	PMID: 25065622
215	Myeloid Cells	Mast Cells	LGALS9	CD44	0.0288591	0	LGALS9_CD44	LGALS9 - CD44	GALECTIN	PMID: 25065622
216	Myeloid Cells	Myeloid Cells	LGALS9	CD44	0.0199528	0	LGALS9_CD44	LGALS9 - CD44	GALECTIN	PMID: 25065622
217	Myeloid Cells	NK Cells	LGALS9	CD44	0.0189859	0	LGALS9_CD44	LGALS9 - CD44	GALECTIN	PMID: 25065622

## Sheet: VHL mutation
	source	target	ligand	receptor	prob	pval	interaction_name	interaction_name_2	pathway_name	evidence
1	Tumor	Endothelial Cells	GDF15	TGFBR2	0.0206673	0	GDF15_TGFBR2	GDF15 - TGFBR2	GDF	KEGG: hsa04350
2	Tumor	Myeloid Cells	GDF15	TGFBR2	0.00176981	0	GDF15_TGFBR2	GDF15 - TGFBR2	GDF	KEGG: hsa04350
3	Tumor	NK Cells	GDF15	TGFBR2	0.000651493	0	GDF15_TGFBR2	GDF15 - TGFBR2	GDF	KEGG: hsa04350
4	Tumor	Tumor	TGFA	EGFR	0.00652954	0	TGFA_EGFR	TGFA - EGFR	EGF	KEGG: hsa04012
5	Tumor	Tumor	TGFA	EGFR_ERBB2	0.00265679	0	TGFA_EGFR_ERBB2	TGFA - (EGFR+ERBB2)	EGF	KEGG: hsa04012
6	B Cells	Tumor	AREG	EGFR	0.00372482	0	AREG_EGFR	AREG - EGFR	EGF	KEGG: hsa04012
7	Mast Cells	Tumor	AREG	EGFR	0.0835211	0	AREG_EGFR	AREG - EGFR	EGF	KEGG: hsa04012
8	Myeloid Cells	Tumor	AREG	EGFR	0.0212601	0	AREG_EGFR	AREG - EGFR	EGF	KEGG: hsa04012
9	NK Cells	Tumor	AREG	EGFR	0.0194113	0	AREG_EGFR	AREG - EGFR	EGF	KEGG: hsa04012
10	B Cells	Tumor	AREG	EGFR_ERBB2	0.00151305	0	AREG_EGFR_ERBB2	AREG - (EGFR+ERBB2)	EGF	KEGG: hsa04012
11	Mast Cells	Tumor	AREG	EGFR_ERBB2	0.035621	0	AREG_EGFR_ERBB2	AREG - (EGFR+ERBB2)	EGF	KEGG: hsa04012
12	Myeloid Cells	Tumor	AREG	EGFR_ERBB2	0.00872721	0	AREG_EGFR_ERBB2	AREG - (EGFR+ERBB2)	EGF	KEGG: hsa04012
13	NK Cells	Tumor	AREG	EGFR_ERBB2	0.00795944	0	AREG_EGFR_ERBB2	AREG - (EGFR+ERBB2)	EGF	KEGG: hsa04012
14	Myeloid Cells	Tumor	HBEGF	EGFR	0.0131787	0	HBEGF_EGFR	HBEGF - EGFR	EGF	KEGG: hsa04012
15	Myeloid Cells	Tumor	HBEGF	EGFR_ERBB2	0.00538364	0	HBEGF_EGFR_ERBB2	HBEGF - (EGFR+ERBB2)	EGF	KEGG: hsa04012
16	Endothelial Cells	Endothelial Cells	FGF2	FGFR1	0.00254936	0	FGF2_FGFR1	FGF2 - FGFR1	FGF	PMC: 4393358
17	Myeloid Cells	Endothelial Cells	VEGFA	FLT1	0.011948	0	VEGFA_VEGFR1	VEGFA - VEGFR1	VEGF	KEGG: hsa04370; PMID: 16633338
18	Tumor	Endothelial Cells	VEGFA	FLT1	0.232799	0	VEGFA_VEGFR1	VEGFA - VEGFR1	VEGF	KEGG: hsa04370; PMID: 16633338
19	Myeloid Cells	Endothelial Cells	VEGFA	KDR	0.00752756	0	VEGFA_VEGFR2	VEGFA - VEGFR2	VEGF	KEGG: hsa04370; PMID: 16633338
20	Tumor	Endothelial Cells	VEGFA	KDR	0.159892	0	VEGFA_VEGFR2	VEGFA - VEGFR2	VEGF	KEGG: hsa04370; PMID: 16633338
21	Tumor	Endothelial Cells	VEGFB	FLT1	0.0152345	0	VEGFB_VEGFR1	VEGFB - VEGFR1	VEGF	KEGG: hsa04370; PMID: 16633338
22	Endothelial Cells	Endothelial Cells	VEGFC	FLT4	0.00217606	0	VEGFC_VEGFR3	VEGFC - VEGFR3	VEGF	KEGG: hsa04370; PMID: 16633338
23	Endothelial Cells	Endothelial Cells	VEGFC	KDR	0.0221712	0	VEGFC_VEGFR2	VEGFC - VEGFR2	VEGF	KEGG: hsa04370; PMID: 16633338
24	Myeloid Cells	Endothelial Cells	VEGFA	FLT1_KDR	0.0108406	0	VEGFA_VEGFR1R2	VEGFA - VEGFR1R2	VEGF	PMID: 16633338
25	Tumor	Endothelial Cells	VEGFA	FLT1_KDR	0.215691	0	VEGFA_VEGFR1R2	VEGFA - VEGFR1R2	VEGF	PMID: 16633338
26	Endothelial Cells	Endothelial Cells	VEGFC	FLT4_KDR	0.0079828	0	VEGFC_VEGFR2R3	VEGFC - VEGFR2R3	VEGF	PMID: 16633338
27	Tumor	Endothelial Cells	APLN	APLNR	0.00115948	0	APLN_APLNR	APLN - APLNR	APELIN	KEGG: hsa04371
28	B Cells	Myeloid Cells	CCL5	CCR1	0.00205995	0	CCL5_CCR1	CCL5 - CCR1	CCL	KEGG: hsa04060
29	CD4+ Cells	Myeloid Cells	CCL5	CCR1	0.00717079	0	CCL5_CCR1	CCL5 - CCR1	CCL	KEGG: hsa04060
30	CD8+ Cells	Myeloid Cells	CCL5	CCR1	0.0302162	0	CCL5_CCR1	CCL5 - CCR1	CCL	KEGG: hsa04060
31	Kidney Epithelium	Myeloid Cells	CCL5	CCR1	0.00163464	0	CCL5_CCR1	CCL5 - CCR1	CCL	KEGG: hsa04060
32	NK Cells	Myeloid Cells	CCL5	CCR1	0.0225407	0	CCL5_CCR1	CCL5 - CCR1	CCL	KEGG: hsa04060
33	CD8+ Cells	Myeloid Cells	CCL3	CCR1	0.00402377	0	CCL3_CCR1	CCL3 - CCR1	CCL	KEGG: hsa04060
34	NK Cells	Myeloid Cells	CCL3	CCR1	0.0039196	0	CCL3_CCR1	CCL3 - CCR1	CCL	KEGG: hsa04060
35	Tumor	Myeloid Cells	CCL15	CCR1	0.000642716	0	CCL15_CCR1	CCL15 - CCR1	CCL	KEGG: hsa04060
36	CD4+ Cells	B Cells	MIF	CD74_CXCR4	0.135445	0.02	MIF_CD74_CXCR4	MIF - (CD74+CXCR4)	MIF	PMID: 29637711; PMID: 24760155
37	CD8+ Cells	B Cells	MIF	CD74_CXCR4	0.147913	0	MIF_CD74_CXCR4	MIF - (CD74+CXCR4)	MIF	PMID: 29637711; PMID: 24760155
38	Endothelial Cells	B Cells	MIF	CD74_CXCR4	0.134587	0.02	MIF_CD74_CXCR4	MIF - (CD74+CXCR4)	MIF	PMID: 29637711; PMID: 24760155
39	Kidney Epithelium	B Cells	MIF	CD74_CXCR4	0.243547	0	MIF_CD74_CXCR4	MIF - (CD74+CXCR4)	MIF	PMID: 29637711; PMID: 24760155
40	Mast Cells	B Cells	MIF	CD74_CXCR4	0.158198	0.02	MIF_CD74_CXCR4	MIF - (CD74+CXCR4)	MIF	PMID: 29637711; PMID: 24760155
41	NK Cells	B Cells	MIF	CD74_CXCR4	0.144439	0	MIF_CD74_CXCR4	MIF - (CD74+CXCR4)	MIF	PMID: 29637711; PMID: 24760155
42	Tumor	B Cells	MIF	CD74_CXCR4	0.305274	0	MIF_CD74_CXCR4	MIF - (CD74+CXCR4)	MIF	PMID: 29637711; PMID: 24760155
43	Kidney Epithelium	CD4+ Cells	MIF	CD74_CXCR4	0.155559	0.03	MIF_CD74_CXCR4	MIF - (CD74+CXCR4)	MIF	PMID: 29637711; PMID: 24760155
44	Tumor	CD4+ Cells	MIF	CD74_CXCR4	0.200908	0	MIF_CD74_CXCR4	MIF - (CD74+CXCR4)	MIF	PMID: 29637711; PMID: 24760155
45	CD4+ Cells	CD8+ Cells	MIF	CD74_CXCR4	0.119871	0.01	MIF_CD74_CXCR4	MIF - (CD74+CXCR4)	MIF	PMID: 29637711; PMID: 24760155
46	CD8+ Cells	CD8+ Cells	MIF	CD74_CXCR4	0.131123	0	MIF_CD74_CXCR4	MIF - (CD74+CXCR4)	MIF	PMID: 29637711; PMID: 24760155
47	Kidney Epithelium	CD8+ Cells	MIF	CD74_CXCR4	0.218688	0	MIF_CD74_CXCR4	MIF - (CD74+CXCR4)	MIF	PMID: 29637711; PMID: 24760155
48	Mast Cells	CD8+ Cells	MIF	CD74_CXCR4	0.140433	0.04	MIF_CD74_CXCR4	MIF - (CD74+CXCR4)	MIF	PMID: 29637711; PMID: 24760155
49	NK Cells	CD8+ Cells	MIF	CD74_CXCR4	0.127985	0	MIF_CD74_CXCR4	MIF - (CD74+CXCR4)	MIF	PMID: 29637711; PMID: 24760155
50	Tumor	CD8+ Cells	MIF	CD74_CXCR4	0.276417	0	MIF_CD74_CXCR4	MIF - (CD74+CXCR4)	MIF	PMID: 29637711; PMID: 24760155
51	Kidney Epithelium	Myeloid Cells	MIF	CD74_CXCR4	0.16191	0.01	MIF_CD74_CXCR4	MIF - (CD74+CXCR4)	MIF	PMID: 29637711; PMID: 24760155
52	Tumor	Myeloid Cells	MIF	CD74_CXCR4	0.208653	0	MIF_CD74_CXCR4	MIF - (CD74+CXCR4)	MIF	PMID: 29637711; PMID: 24760155
53	Tumor	NK Cells	MIF	CD74_CXCR4	0.178426	0	MIF_CD74_CXCR4	MIF - (CD74+CXCR4)	MIF	PMID: 29637711; PMID: 24760155
54	CD8+ Cells	B Cells	MIF	CD74_CD44	0.105425	0.02	MIF_CD74_CD44	MIF - (CD74+CD44)	MIF	PMID: 29637711; PMID: 26175090
55	Kidney Epithelium	B Cells	MIF	CD74_CD44	0.179371	0	MIF_CD74_CD44	MIF - (CD74+CD44)	MIF	PMID: 29637711; PMID: 26175090
56	Mast Cells	B Cells	MIF	CD74_CD44	0.113148	0.03	MIF_CD74_CD44	MIF - (CD74+CD44)	MIF	PMID: 29637711; PMID: 26175090
57	NK Cells	B Cells	MIF	CD74_CD44	0.102829	0.02	MIF_CD74_CD44	MIF - (CD74+CD44)	MIF	PMID: 29637711; PMID: 26175090
58	Tumor	B Cells	MIF	CD74_CD44	0.229774	0	MIF_CD74_CD44	MIF - (CD74+CD44)	MIF	PMID: 29637711; PMID: 26175090
59	Kidney Epithelium	CD4+ Cells	MIF	CD74_CD44	0.133151	0	MIF_CD74_CD44	MIF - (CD74+CD44)	MIF	PMID: 29637711; PMID: 26175090
60	Tumor	CD4+ Cells	MIF	CD74_CD44	0.17331	0	MIF_CD74_CD44	MIF - (CD74+CD44)	MIF	PMID: 29637711; PMID: 26175090
61	CD8+ Cells	CD8+ Cells	MIF	CD74_CD44	0.0887275	0	MIF_CD74_CD44	MIF - (CD74+CD44)	MIF	PMID: 29637711; PMID: 26175090
62	Kidney Epithelium	CD8+ Cells	MIF	CD74_CD44	0.152964	0	MIF_CD74_CD44	MIF - (CD74+CD44)	MIF	PMID: 29637711; PMID: 26175090
63	NK Cells	CD8+ Cells	MIF	CD74_CD44	0.0865029	0.04	MIF_CD74_CD44	MIF - (CD74+CD44)	MIF	PMID: 29637711; PMID: 26175090
64	Tumor	CD8+ Cells	MIF	CD74_CD44	0.197735	0	MIF_CD74_CD44	MIF - (CD74+CD44)	MIF	PMID: 29637711; PMID: 26175090
65	CD4+ Cells	Myeloid Cells	MIF	CD74_CD44	0.103514	0	MIF_CD74_CD44	MIF - (CD74+CD44)	MIF	PMID: 29637711; PMID: 26175090
66	CD8+ Cells	Myeloid Cells	MIF	CD74_CD44	0.113429	0	MIF_CD74_CD44	MIF - (CD74+CD44)	MIF	PMID: 29637711; PMID: 26175090
67	Endothelial Cells	Myeloid Cells	MIF	CD74_CD44	0.102835	0	MIF_CD74_CD44	MIF - (CD74+CD44)	MIF	PMID: 29637711; PMID: 26175090
68	Kidney Epithelium	Myeloid Cells	MIF	CD74_CD44	0.191786	0	MIF_CD74_CD44	MIF - (CD74+CD44)	MIF	PMID: 29637711; PMID: 26175090
69	Mast Cells	Myeloid Cells	MIF	CD74_CD44	0.121659	0.01	MIF_CD74_CD44	MIF - (CD74+CD44)	MIF	PMID: 29637711; PMID: 26175090
70	NK Cells	Myeloid Cells	MIF	CD74_CD44	0.11066	0	MIF_CD74_CD44	MIF - (CD74+CD44)	MIF	PMID: 29637711; PMID: 26175090
71	Tumor	Myeloid Cells	MIF	CD74_CD44	0.244637	0	MIF_CD74_CD44	MIF - (CD74+CD44)	MIF	PMID: 29637711; PMID: 26175090
72	Tumor	NK Cells	MIF	CD74_CD44	0.129029	0	MIF_CD74_CD44	MIF - (CD74+CD44)	MIF	PMID: 29637711; PMID: 26175090
73	B Cells	Endothelial Cells	MIF	ACKR3	0.0373946	0	MIF_ACKR3	MIF - ACKR3	MIF	PMID: 26175090
74	CD4+ Cells	Endothelial Cells	MIF	ACKR3	0.0420286	0	MIF_ACKR3	MIF - ACKR3	MIF	PMID: 26175090
75	CD8+ Cells	Endothelial Cells	MIF	ACKR3	0.0463586	0	MIF_ACKR3	MIF - ACKR3	MIF	PMID: 26175090
76	Endothelial Cells	Endothelial Cells	MIF	ACKR3	0.0417339	0	MIF_ACKR3	MIF - ACKR3	MIF	PMID: 26175090
77	Kidney Epithelium	Endothelial Cells	MIF	ACKR3	0.0827052	0	MIF_ACKR3	MIF - ACKR3	MIF	PMID: 26175090
78	Mast Cells	Endothelial Cells	MIF	ACKR3	0.0499965	0	MIF_ACKR3	MIF - ACKR3	MIF	PMID: 26175090
79	Myeloid Cells	Endothelial Cells	MIF	ACKR3	0.0346879	0	MIF_ACKR3	MIF - ACKR3	MIF	PMID: 26175090
80	NK Cells	Endothelial Cells	MIF	ACKR3	0.0451436	0	MIF_ACKR3	MIF - ACKR3	MIF	PMID: 26175090
81	Tumor	Endothelial Cells	MIF	ACKR3	0.109572	0	MIF_ACKR3	MIF - ACKR3	MIF	PMID: 26175090
82	B Cells	CD4+ Cells	IL7	IL7R_IL2RG	0.00477759	0	IL7_IL7R_IL2RG	IL7 - (IL7R+IL2RG)	IL2	KEGG: hsa04060
83	Myeloid Cells	Endothelial Cells	OSM	LIFR_IL6ST	0.0105889	0	OSM_LIFR_IL6ST	OSM - (LIFR+IL6ST)	OSM	KEGG: hsa04060
84	Myeloid Cells	Endothelial Cells	OSM	OSMR_IL6ST	0.00714374	0	OSM_OSMR_IL6ST	OSM - (OSMR+IL6ST)	OSM	KEGG: hsa04060
85	Myeloid Cells	Tumor	OSM	OSMR_IL6ST	0.00194306	0	OSM_OSMR_IL6ST	OSM - (OSMR+IL6ST)	OSM	KEGG: hsa04060
86	Mast Cells	Myeloid Cells	CSF1	CSF1R	0.00933592	0	CSF1_CSF1R	CSF1 - CSF1R	CSF	KEGG: hsa04060
87	B Cells	CD4+ Cells	IL16	CD4	0.000805505	0	IL16_CD4	IL16 - CD4	IL16	KEGG: hsa04060
88	CD4+ Cells	CD4+ Cells	IL16	CD4	0.00319333	0	IL16_CD4	IL16 - CD4	IL16	KEGG: hsa04060
89	CD8+ Cells	CD4+ Cells	IL16	CD4	0.00410851	0	IL16_CD4	IL16 - CD4	IL16	KEGG: hsa04060
90	Myeloid Cells	CD4+ Cells	IL16	CD4	0.00263032	0	IL16_CD4	IL16 - CD4	IL16	KEGG: hsa04060
91	NK Cells	CD4+ Cells	IL16	CD4	0.00482221	0	IL16_CD4	IL16 - CD4	IL16	KEGG: hsa04060
92	B Cells	Myeloid Cells	IL16	CD4	0.000657033	0	IL16_CD4	IL16 - CD4	IL16	KEGG: hsa04060
93	CD4+ Cells	Myeloid Cells	IL16	CD4	0.00260588	0	IL16_CD4	IL16 - CD4	IL16	KEGG: hsa04060
94	CD8+ Cells	Myeloid Cells	IL16	CD4	0.00335327	0	IL16_CD4	IL16 - CD4	IL16	KEGG: hsa04060
95	Myeloid Cells	Myeloid Cells	IL16	CD4	0.00214622	0	IL16_CD4	IL16 - CD4	IL16	KEGG: hsa04060
96	NK Cells	Myeloid Cells	IL16	CD4	0.00393629	0	IL16_CD4	IL16 - CD4	IL16	KEGG: hsa04060
97	CD8+ Cells	Myeloid Cells	IFNG	IFNGR1_IFNGR2	0.00795942	0	IFNG_IFNGR1_IFNGR2	IFNG - (IFNGR1+IFNGR2)	IFN-II	KEGG: hsa04060
98	B Cells	Endothelial Cells	TNF	TNFRSF1A	0.0018801	0	TNF_TNFRSF1A	TNF - TNFRSF1A	TNF	KEGG: hsa04060
99	B Cells	Myeloid Cells	TNF	TNFRSF1A	0.00057492	0	TNF_TNFRSF1A	TNF - TNFRSF1A	TNF	KEGG: hsa04060
100	B Cells	Tumor	TNF	TNFRSF1A	0.00059315	0	TNF_TNFRSF1A	TNF - TNFRSF1A	TNF	KEGG: hsa04060
101	B Cells	CD4+ Cells	TNF	TNFRSF1B	0.00098319	0.04	TNF_TNFRSF1B	TNF - TNFRSF1B	TNF	KEGG: hsa04060
102	B Cells	CD8+ Cells	TNF	TNFRSF1B	0.00121575	0.02	TNF_TNFRSF1B	TNF - TNFRSF1B	TNF	KEGG: hsa04060
103	B Cells	Myeloid Cells	TNF	TNFRSF1B	0.00277611	0.02	TNF_TNFRSF1B	TNF - TNFRSF1B	TNF	KEGG: hsa04060
104	Tumor	B Cells	CD70	CD27	0.00104589	0	CD70_CD27	CD70 - CD27	CD70	KEGG: hsa04060
105	Tumor	CD4+ Cells	CD70	CD27	0.00140322	0	CD70_CD27	CD70 - CD27	CD70	KEGG: hsa04060
106	Tumor	CD8+ Cells	CD70	CD27	0.00860907	0	CD70_CD27	CD70 - CD27	CD70	KEGG: hsa04060
107	Myeloid Cells	B Cells	TNFSF13B	TNFRSF13B	0.0361543	0	TNFSF13B_TNFRSF13B	TNFSF13B - TNFRSF13B	BAFF	KEGG: hsa04060
108	Myeloid Cells	B Cells	TNFSF13B	TNFRSF13C	0.0403328	0	TNFSF13B_TNFRSF13C	TNFSF13B - TNFRSF13C	BAFF	KEGG: hsa04060
109	Endothelial Cells	B Cells	SPP1	CD44	0.00677359	0	SPP1_CD44	SPP1 - CD44	SPP1	PMID: 21907263
110	Kidney Epithelium	B Cells	SPP1	CD44	0.00960767	0	SPP1_CD44	SPP1 - CD44	SPP1	PMID: 21907263
111	Tumor	B Cells	SPP1	CD44	0.125404	0	SPP1_CD44	SPP1 - CD44	SPP1	PMID: 21907263
112	Endothelial Cells	CD4+ Cells	SPP1	CD44	0.0106277	0	SPP1_CD44	SPP1 - CD44	SPP1	PMID: 21907263
113	Kidney Epithelium	CD4+ Cells	SPP1	CD44	0.0150499	0	SPP1_CD44	SPP1 - CD44	SPP1	PMID: 21907263
114	Tumor	CD4+ Cells	SPP1	CD44	0.184237	0	SPP1_CD44	SPP1 - CD44	SPP1	PMID: 21907263
115	Endothelial Cells	CD8+ Cells	SPP1	CD44	0.00679767	0	SPP1_CD44	SPP1 - CD44	SPP1	PMID: 21907263
116	Kidney Epithelium	CD8+ Cells	SPP1	CD44	0.00964173	0	SPP1_CD44	SPP1 - CD44	SPP1	PMID: 21907263
117	Tumor	CD8+ Cells	SPP1	CD44	0.125796	0	SPP1_CD44	SPP1 - CD44	SPP1	PMID: 21907263
118	Endothelial Cells	Mast Cells	SPP1	CD44	0.0143872	0	SPP1_CD44	SPP1 - CD44	SPP1	PMID: 21907263
119	Kidney Epithelium	Mast Cells	SPP1	CD44	0.0203416	0	SPP1_CD44	SPP1 - CD44	SPP1	PMID: 21907263
120	Tumor	Mast Cells	SPP1	CD44	0.234833	0	SPP1_CD44	SPP1 - CD44	SPP1	PMID: 21907263
121	Endothelial Cells	Myeloid Cells	SPP1	CD44	0.00857914	0	SPP1_CD44	SPP1 - CD44	SPP1	PMID: 21907263
122	Kidney Epithelium	Myeloid Cells	SPP1	CD44	0.0121594	0	SPP1_CD44	SPP1 - CD44	SPP1	PMID: 21907263
123	Tumor	Myeloid Cells	SPP1	CD44	0.15393	0	SPP1_CD44	SPP1 - CD44	SPP1	PMID: 21907263
124	Endothelial Cells	NK Cells	SPP1	CD44	0.00733894	0	SPP1_CD44	SPP1 - CD44	SPP1	PMID: 21907263
125	Kidney Epithelium	NK Cells	SPP1	CD44	0.0104071	0	SPP1_CD44	SPP1 - CD44	SPP1	PMID: 21907263
126	Tumor	NK Cells	SPP1	CD44	0.134529	0	SPP1_CD44	SPP1 - CD44	SPP1	PMID: 21907263
127	Endothelial Cells	Endothelial Cells	SPP1	ITGAV_ITGB1	0.00418637	0	SPP1_ITGAV_ITGB1	SPP1 - (ITGAV+ITGB1)	SPP1	PMID: 21907263
128	Kidney Epithelium	Endothelial Cells	SPP1	ITGAV_ITGB1	0.00594443	0	SPP1_ITGAV_ITGB1	SPP1 - (ITGAV+ITGB1)	SPP1	PMID: 21907263
129	Tumor	Endothelial Cells	SPP1	ITGAV_ITGB1	0.0812096	0	SPP1_ITGAV_ITGB1	SPP1 - (ITGAV+ITGB1)	SPP1	PMID: 21907263
130	Endothelial Cells	Endothelial Cells	SPP1	ITGAV_ITGB5	0.00113901	0	SPP1_ITGAV_ITGB5	SPP1 - (ITGAV+ITGB5)	SPP1	PMID: 21907263
131	Kidney Epithelium	Endothelial Cells	SPP1	ITGAV_ITGB5	0.00161942	0	SPP1_ITGAV_ITGB5	SPP1 - (ITGAV+ITGB5)	SPP1	PMID: 21907263
132	Tumor	Endothelial Cells	SPP1	ITGAV_ITGB5	0.0234134	0	SPP1_ITGAV_ITGB5	SPP1 - (ITGAV+ITGB5)	SPP1	PMID: 21907263
133	Endothelial Cells	B Cells	SPP1	ITGA4_ITGB1	0.00463338	0	SPP1_ITGA4_ITGB1	SPP1 - (ITGA4+ITGB1)	SPP1	PMID: 21907263
134	Kidney Epithelium	B Cells	SPP1	ITGA4_ITGB1	0.00657792	0	SPP1_ITGA4_ITGB1	SPP1 - (ITGA4+ITGB1)	SPP1	PMID: 21907263
135	Tumor	B Cells	SPP1	ITGA4_ITGB1	0.0891447	0	SPP1_ITGA4_ITGB1	SPP1 - (ITGA4+ITGB1)	SPP1	PMID: 21907263
136	Endothelial Cells	CD4+ Cells	SPP1	ITGA4_ITGB1	0.00672285	0	SPP1_ITGA4_ITGB1	SPP1 - (ITGA4+ITGB1)	SPP1	PMID: 21907263
137	Kidney Epithelium	CD4+ Cells	SPP1	ITGA4_ITGB1	0.0095359	0	SPP1_ITGA4_ITGB1	SPP1 - (ITGA4+ITGB1)	SPP1	PMID: 21907263
138	Tumor	CD4+ Cells	SPP1	ITGA4_ITGB1	0.124576	0	SPP1_ITGA4_ITGB1	SPP1 - (ITGA4+ITGB1)	SPP1	PMID: 21907263
139	Endothelial Cells	CD8+ Cells	SPP1	ITGA4_ITGB1	0.00708153	0	SPP1_ITGA4_ITGB1	SPP1 - (ITGA4+ITGB1)	SPP1	PMID: 21907263
140	Kidney Epithelium	CD8+ Cells	SPP1	ITGA4_ITGB1	0.0100432	0	SPP1_ITGA4_ITGB1	SPP1 - (ITGA4+ITGB1)	SPP1	PMID: 21907263
141	Tumor	CD8+ Cells	SPP1	ITGA4_ITGB1	0.130397	0	SPP1_ITGA4_ITGB1	SPP1 - (ITGA4+ITGB1)	SPP1	PMID: 21907263
142	Endothelial Cells	Myeloid Cells	SPP1	ITGA4_ITGB1	0.00268926	0	SPP1_ITGA4_ITGB1	SPP1 - (ITGA4+ITGB1)	SPP1	PMID: 21907263
143	Kidney Epithelium	Myeloid Cells	SPP1	ITGA4_ITGB1	0.00382103	0.01	SPP1_ITGA4_ITGB1	SPP1 - (ITGA4+ITGB1)	SPP1	PMID: 21907263
144	Tumor	Myeloid Cells	SPP1	ITGA4_ITGB1	0.0536519	0	SPP1_ITGA4_ITGB1	SPP1 - (ITGA4+ITGB1)	SPP1	PMID: 21907263
145	Endothelial Cells	NK Cells	SPP1	ITGA4_ITGB1	0.003663	0	SPP1_ITGA4_ITGB1	SPP1 - (ITGA4+ITGB1)	SPP1	PMID: 21907263
146	Kidney Epithelium	NK Cells	SPP1	ITGA4_ITGB1	0.00520242	0.01	SPP1_ITGA4_ITGB1	SPP1 - (ITGA4+ITGB1)	SPP1	PMID: 21907263
147	Tumor	NK Cells	SPP1	ITGA4_ITGB1	0.0717508	0	SPP1_ITGA4_ITGB1	SPP1 - (ITGA4+ITGB1)	SPP1	PMID: 21907263
148	Endothelial Cells	Endothelial Cells	SPP1	ITGA8_ITGB1	0.00420453	0	SPP1_ITGA8_ITGB1	SPP1 - (ITGA8+ITGB1)	SPP1	PMID: 21907263
149	Kidney Epithelium	Endothelial Cells	SPP1	ITGA8_ITGB1	0.00597018	0	SPP1_ITGA8_ITGB1	SPP1 - (ITGA8+ITGB1)	SPP1	PMID: 21907263
150	Tumor	Endothelial Cells	SPP1	ITGA8_ITGB1	0.0815346	0	SPP1_ITGA8_ITGB1	SPP1 - (ITGA8+ITGB1)	SPP1	PMID: 21907263
151	Endothelial Cells	Endothelial Cells	SPP1	ITGA5_ITGB1	0.00915147	0	SPP1_ITGA5_ITGB1	SPP1 - (ITGA5+ITGB1)	SPP1	PMID: 21907263
152	Kidney Epithelium	Endothelial Cells	SPP1	ITGA5_ITGB1	0.0129675	0	SPP1_ITGA5_ITGB1	SPP1 - (ITGA5+ITGB1)	SPP1	PMID: 21907263
153	Tumor	Endothelial Cells	SPP1	ITGA5_ITGB1	0.162609	0	SPP1_ITGA5_ITGB1	SPP1 - (ITGA5+ITGB1)	SPP1	PMID: 21907263
154	Endothelial Cells	Endothelial Cells	NAMPT	INSR	0.0292126	0	NAMPT_INSR	NAMPT - INSR	VISFATIN	PMID: 28490838
155	Myeloid Cells	Endothelial Cells	NAMPT	INSR	0.228064	0	NAMPT_INSR	NAMPT - INSR	VISFATIN	PMID: 28490838
156	Tumor	Endothelial Cells	NAMPT	INSR	0.0686892	0	NAMPT_INSR	NAMPT - INSR	VISFATIN	PMID: 28490838
157	Endothelial Cells	Tumor	NAMPT	INSR	0.00113268	0	NAMPT_INSR	NAMPT - INSR	VISFATIN	PMID: 28490838
158	Myeloid Cells	Tumor	NAMPT	INSR	0.0110109	0	NAMPT_INSR	NAMPT - INSR	VISFATIN	PMID: 28490838
159	Tumor	Tumor	NAMPT	INSR	0.00277168	0	NAMPT_INSR	NAMPT - INSR	VISFATIN	PMID: 28490838
160	Endothelial Cells	Endothelial Cells	NAMPT	ITGA5_ITGB1	0.0195586	0	NAMPT_ITGA5_ITGB1	NAMPT - (ITGA5+ITGB1)	VISFATIN	PMID: 28490838
161	Myeloid Cells	Endothelial Cells	NAMPT	ITGA5_ITGB1	0.163782	0	NAMPT_ITGA5_ITGB1	NAMPT - (ITGA5+ITGB1)	VISFATIN	PMID: 28490838
162	Tumor	Endothelial Cells	NAMPT	ITGA5_ITGB1	0.0466158	0	NAMPT_ITGA5_ITGB1	NAMPT - (ITGA5+ITGB1)	VISFATIN	PMID: 28490838
163	Endothelial Cells	Endothelial Cells	ANGPTL2	ITGA5_ITGB1	0.0108134	0	ANGPTL2_ITGA5_ITGB1	ANGPTL2 - (ITGA5+ITGB1)	ANGPTL	PMID: 24478758
164	Endothelial Cells	Myeloid Cells	ANGPTL2	LILRB3	0.00167487	0	ANGPTL2_PIRB	ANGPTL2 - PIRB	ANGPTL	PMID: 24478758
165	Tumor	Endothelial Cells	ANGPTL4	ITGA5_ITGB1	0.0919083	0	ANGPTL4_ITGA5_ITGB1	ANGPTL4 - (ITGA5+ITGB1)	ANGPTL	PMID: 30049845
166	Tumor	Endothelial Cells	ANGPTL4	CDH5	0.0663847	0	ANGPTL4_CDH5	ANGPTL4 - CDH5	ANGPTL	PMID: 30049845
167	Tumor	Kidney Epithelium	ANGPTL4	SDC2	0.00647921	0	ANGPTL4_SDC2	ANGPTL4 - SDC2	ANGPTL	PMID: 29017031
168	Tumor	Tumor	ANGPTL4	SDC2	0.0106962	0	ANGPTL4_SDC2	ANGPTL4 - SDC2	ANGPTL	PMID: 29017031
169	Tumor	Tumor	ANGPTL4	SDC4	0.00820745	0	ANGPTL4_SDC4	ANGPTL4 - SDC4	ANGPTL	PMID: 29017031
170	Endothelial Cells	Endothelial Cells	ANGPT2	TEK	0.0112277	0	ANGPT2_TEK	ANGPT2 - TEK	ANGPT	PMID: 20651738
171	Endothelial Cells	Endothelial Cells	ANGPT2	ITGA5_ITGB1	0.0548574	0	ANGPT2_ITGA5_ITGB1	ANGPT2 - (ITGA5+ITGB1)	ANGPT	PMID: 20651738; PMID: 25635707
172	Tumor	Kidney Epithelium	MDK	SDC2	0.000687519	0	MDK_SDC2	MDK - SDC2	MK	PMID: 28356350
173	Tumor	Tumor	MDK	SDC2	0.00113931	0	MDK_SDC2	MDK - SDC2	MK	PMID: 28356350
174	Tumor	Tumor	MDK	SDC4	0.000872263	0	MDK_SDC4	MDK - SDC4	MK	PMID: 28356350
175	Tumor	B Cells	MDK	ITGA4_ITGB1	0.00535259	0	MDK_ITGA4_ITGB1	MDK - (ITGA4+ITGB1)	MK	PMID: 28356350
176	Tumor	CD4+ Cells	MDK	ITGA4_ITGB1	0.00776387	0	MDK_ITGA4_ITGB1	MDK - (ITGA4+ITGB1)	MK	PMID: 28356350
177	Tumor	CD8+ Cells	MDK	ITGA4_ITGB1	0.00817765	0	MDK_ITGA4_ITGB1	MDK - (ITGA4+ITGB1)	MK	PMID: 28356350
178	Tumor	Myeloid Cells	MDK	ITGA4_ITGB1	0.00310765	0	MDK_ITGA4_ITGB1	MDK - (ITGA4+ITGB1)	MK	PMID: 28356350
179	Tumor	NK Cells	MDK	ITGA4_ITGB1	0.00423223	0	MDK_ITGA4_ITGB1	MDK - (ITGA4+ITGB1)	MK	PMID: 28356350
180	Tumor	Endothelial Cells	MDK	ITGA6_ITGB1	0.0141876	0	MDK_ITGA6_ITGB1	MDK - (ITGA6+ITGB1)	MK	PMID: 28356350
181	Tumor	Tumor	MDK	ITGA6_ITGB1	0.00159196	0	MDK_ITGA6_ITGB1	MDK - (ITGA6+ITGB1)	MK	PMID: 28356350
182	Tumor	Myeloid Cells	MDK	LRP1	0.00149984	0	MDK_LRP1	MDK - LRP1	MK	PMID: 28356350
183	Tumor	Tumor	MDK	LRP1	0.000534385	0	MDK_LRP1	MDK - LRP1	MK	PMID: 28356350
184	Tumor	B Cells	MDK	NCL	0.00716292	0	MDK_NCL	MDK - NCL	MK	PMID: 28356350
185	Tumor	CD4+ Cells	MDK	NCL	0.0064816	0	MDK_NCL	MDK - NCL	MK	PMID: 28356350
186	Tumor	CD8+ Cells	MDK	NCL	0.00857059	0	MDK_NCL	MDK - NCL	MK	PMID: 28356350
187	Tumor	Endothelial Cells	MDK	NCL	0.00713431	0	MDK_NCL	MDK - NCL	MK	PMID: 28356350
188	Tumor	Kidney Epithelium	MDK	NCL	0.00179257	0	MDK_NCL	MDK - NCL	MK	PMID: 28356350
189	Tumor	Mast Cells	MDK	NCL	0.00726639	0	MDK_NCL	MDK - NCL	MK	PMID: 28356350
190	Tumor	Myeloid Cells	MDK	NCL	0.00544004	0	MDK_NCL	MDK - NCL	MK	PMID: 28356350
191	Tumor	NK Cells	MDK	NCL	0.00917852	0	MDK_NCL	MDK - NCL	MK	PMID: 28356350
192	Tumor	Tumor	MDK	NCL	0.00853101	0	MDK_NCL	MDK - NCL	MK	PMID: 28356350
193	Tumor	Endothelial Cells	EDN1	EDNRB	0.00616587	0	EDN1_EDNRB	EDN1 - EDNRB	EDN	KEGG: hsa04080
194	Mast Cells	CD8+ Cells	CTSG	F2R	0.0377073	0	CTSG_F2R	CTSG - F2R	PARs	KEGG: hsa04080
195	Mast Cells	Endothelial Cells	CTSG	F2R	0.111625	0	CTSG_F2R	CTSG - F2R	PARs	KEGG: hsa04080
196	CD4+ Cells	CD8+ Cells	GZMA	F2R	0.00656843	0.01	GZMA_F2R	GZMA - F2R	PARs	KEGG: hsa04080
197	CD8+ Cells	CD8+ Cells	GZMA	F2R	0.0379956	0	GZMA_F2R	GZMA - F2R	PARs	KEGG: hsa04080
198	Kidney Epithelium	CD8+ Cells	GZMA	F2R	0.00078593	0.01	GZMA_F2R	GZMA - F2R	PARs	KEGG: hsa04080
199	NK Cells	CD8+ Cells	GZMA	F2R	0.0357329	0	GZMA_F2R	GZMA - F2R	PARs	KEGG: hsa04080
200	CD8+ Cells	Endothelial Cells	GZMA	F2R	0.112413	0	GZMA_F2R	GZMA - F2R	PARs	KEGG: hsa04080
201	NK Cells	Endothelial Cells	GZMA	F2R	0.106208	0	GZMA_F2R	GZMA - F2R	PARs	KEGG: hsa04080
202	Mast Cells	Endothelial Cells	CTSG	F2RL3	0.0451481	0	CTSG_F2RL3	CTSG - F2RL3	PARs	KEGG: hsa04080
203	CD4+ Cells	Endothelial Cells	GZMA	F2RL3	0.00791511	0	GZMA_F2RL3	GZMA - F2RL3	PARs	KEGG: hsa04080
204	CD8+ Cells	Endothelial Cells	GZMA	F2RL3	0.0454905	0	GZMA_F2RL3	GZMA - F2RL3	PARs	KEGG: hsa04080
205	Kidney Epithelium	Endothelial Cells	GZMA	F2RL3	0.000948196	0	GZMA_F2RL3	GZMA - F2RL3	PARs	KEGG: hsa04080
206	NK Cells	Endothelial Cells	GZMA	F2RL3	0.0428014	0	GZMA_F2RL3	GZMA - F2RL3	PARs	KEGG: hsa04080
207	Endothelial Cells	Endothelial Cells	SEMA3F	NRP2_PLXNA2	0.0200666	0	SEMA3F_NRP2_PLXNA2	SEMA3F - (NRP2+PLXNA2)	SEMA3	PMID: 27533782
208	Endothelial Cells	Endothelial Cells	SEMA3G	NRP2_PLXNA2	0.00709404	0	SEMA3G_NRP2_PLXNA2	SEMA3G - (NRP2+PLXNA2)	SEMA3	PMID: 27533782
209	Tumor	Endothelial Cells	ADM	CALCRL	0.0519335	0	ADM_CALCRL	ADM - CALCRL	CALCR	KEGG: hsa04080
210	CD4+ Cells	Myeloid Cells	ANXA1	FPR1	0.0354407	0	ANXA1_FPR1	ANXA1 - FPR1	ANNEXIN	PMID: 23230437
211	Endothelial Cells	Myeloid Cells	ANXA1	FPR1	0.0213452	0	ANXA1_FPR1	ANXA1 - FPR1	ANNEXIN	PMID: 23230437
212	Mast Cells	Myeloid Cells	ANXA1	FPR1	0.0730034	0	ANXA1_FPR1	ANXA1 - FPR1	ANNEXIN	PMID: 23230437
213	Myeloid Cells	Myeloid Cells	ANXA1	FPR1	0.0268838	0	ANXA1_FPR1	ANXA1 - FPR1	ANNEXIN	PMID: 23230437
214	NK Cells	Myeloid Cells	ANXA1	FPR1	0.0240917	0	ANXA1_FPR1	ANXA1 - FPR1	ANNEXIN	PMID: 23230437
215	Endothelial Cells	B Cells	LGALS9	PTPRC	0.0106128	0	LGALS9_CD45	LGALS9 - CD45	GALECTIN	PMID: 30120235
216	Myeloid Cells	B Cells	LGALS9	PTPRC	0.0378913	0	LGALS9_CD45	LGALS9 - CD45	GALECTIN	PMID: 30120235
217	Endothelial Cells	CD4+ Cells	LGALS9	PTPRC	0.0181105	0	LGALS9_CD45	LGALS9 - CD45	GALECTIN	PMID: 30120235
218	Myeloid Cells	CD4+ Cells	LGALS9	PTPRC	0.0634255	0	LGALS9_CD45	LGALS9 - CD45	GALECTIN	PMID: 30120235
219	Endothelial Cells	CD8+ Cells	LGALS9	PTPRC	0.0181103	0	LGALS9_CD45	LGALS9 - CD45	GALECTIN	PMID: 30120235
220	Myeloid Cells	CD8+ Cells	LGALS9	PTPRC	0.0634248	0	LGALS9_CD45	LGALS9 - CD45	GALECTIN	PMID: 30120235
221	Endothelial Cells	Mast Cells	LGALS9	PTPRC	0.00696923	0	LGALS9_CD45	LGALS9 - CD45	GALECTIN	PMID: 30120235
222	Myeloid Cells	Mast Cells	LGALS9	PTPRC	0.0251204	0	LGALS9_CD45	LGALS9 - CD45	GALECTIN	PMID: 30120235
223	Endothelial Cells	Myeloid Cells	LGALS9	PTPRC	0.0160816	0	LGALS9_CD45	LGALS9 - CD45	GALECTIN	PMID: 30120235
224	Myeloid Cells	Myeloid Cells	LGALS9	PTPRC	0.0566126	0	LGALS9_CD45	LGALS9 - CD45	GALECTIN	PMID: 30120235
225	Endothelial Cells	NK Cells	LGALS9	PTPRC	0.017313	0	LGALS9_CD45	LGALS9 - CD45	GALECTIN	PMID: 30120235
226	Myeloid Cells	NK Cells	LGALS9	PTPRC	0.060756	0	LGALS9_CD45	LGALS9 - CD45	GALECTIN	PMID: 30120235
227	Myeloid Cells	NK Cells	BAG6	NCR3	0.000285124	0	BAG6_NCR3-PS	BAG6 - NCR3-PS	BAG	PMID: 30021652
228	Endothelial Cells	CD8+ Cells	LGALS9	HAVCR2	0.00623291	0	LGALS9_HAVCR2	LGALS9 - HAVCR2	GALECTIN	PMID: 27192565
229	Myeloid Cells	CD8+ Cells	LGALS9	HAVCR2	0.0225098	0	LGALS9_HAVCR2	LGALS9 - HAVCR2	GALECTIN	PMID: 27192565
230	Endothelial Cells	Myeloid Cells	LGALS9	HAVCR2	0.00146224	0	LGALS9_HAVCR2	LGALS9 - HAVCR2	GALECTIN	PMID: 27192565
231	Myeloid Cells	Myeloid Cells	LGALS9	HAVCR2	0.00534783	0	LGALS9_HAVCR2	LGALS9 - HAVCR2	GALECTIN	PMID: 27192565
232	Endothelial Cells	NK Cells	LGALS9	HAVCR2	0.00234574	0	LGALS9_HAVCR2	LGALS9 - HAVCR2	GALECTIN	PMID: 27192565
233	Myeloid Cells	NK Cells	LGALS9	HAVCR2	0.00855891	0	LGALS9_HAVCR2	LGALS9 - HAVCR2	GALECTIN	PMID: 27192565
234	Endothelial Cells	B Cells	LGALS9	CD44	0.00827048	0	LGALS9_CD44	LGALS9 - CD44	GALECTIN	PMID: 25065622
235	Myeloid Cells	B Cells	LGALS9	CD44	0.0297093	0	LGALS9_CD44	LGALS9 - CD44	GALECTIN	PMID: 25065622
236	Endothelial Cells	CD4+ Cells	LGALS9	CD44	0.0129652	0	LGALS9_CD44	LGALS9 - CD44	GALECTIN	PMID: 25065622
237	Myeloid Cells	CD4+ Cells	LGALS9	CD44	0.0460091	0	LGALS9_CD44	LGALS9 - CD44	GALECTIN	PMID: 25065622
238	Endothelial Cells	CD8+ Cells	LGALS9	CD44	0.00829984	0	LGALS9_CD44	LGALS9 - CD44	GALECTIN	PMID: 25065622
239	Myeloid Cells	CD8+ Cells	LGALS9	CD44	0.0298124	0	LGALS9_CD44	LGALS9 - CD44	GALECTIN	PMID: 25065622
240	Endothelial Cells	Mast Cells	LGALS9	CD44	0.0175369	0	LGALS9_CD44	LGALS9 - CD44	GALECTIN	PMID: 25065622
241	Myeloid Cells	Mast Cells	LGALS9	CD44	0.0615066	0	LGALS9_CD44	LGALS9 - CD44	GALECTIN	PMID: 25065622
242	Endothelial Cells	Myeloid Cells	LGALS9	CD44	0.0104708	0	LGALS9_CD44	LGALS9 - CD44	GALECTIN	PMID: 25065622
243	Myeloid Cells	Myeloid Cells	LGALS9	CD44	0.0373983	0	LGALS9_CD44	LGALS9 - CD44	GALECTIN	PMID: 25065622
244	Endothelial Cells	NK Cells	LGALS9	CD44	0.00895964	0	LGALS9_CD44	LGALS9 - CD44	GALECTIN	PMID: 25065622
245	Myeloid Cells	NK Cells	LGALS9	CD44	0.032127	0	LGALS9_CD44	LGALS9 - CD44	GALECTIN	PMID: 25065622
