# Supplementary material for: Cell–cell communications shape tumor microenvironment and predict clinical outcomes in clear cell renal carcinoma
Source: J Transl Med. 2023 Feb 10;21:113. doi: 10.1186/s12967-022-03858-x (PMC9921120; doi:10.1186/s12967-022-03858-x)
Supplement: Supplementary file 4 — Additional file 4: List of GO pathways with differential activity in highly ligand-expressing tumor subgroups. [file 12967_2022_3858_MOESM4_ESM.xlsx]

## Sheet: Diff GSVA pathways
	logFC	AveExpr	t	P.Value	adj.P.Val	B
GOBP_METANEPHRIC_TUBULE_FORMATION	0.576464	-0.46148	19.8042	1.35215e-73	1.03358e-69	156.762
GOBP_PRONEPHROS_DEVELOPMENT	0.349331	-0.454406	19.7304	3.84079e-73	1.46795e-69	155.725
GOBP_REGULATION_OF_BRANCHING_INVOLVED_IN_URETERIC_BUD_MORPHOGENESIS	0.309008	-0.315001	19.5048	9.22609e-72	2.35081e-68	152.57
GOBP_MESENCHYMAL_STEM_CELL_MAINTENANCE_INVOLVED_IN_NEPHRON_MORPHOGENESIS	0.461345	-0.486346	19.4151	3.25129e-71	4.97057e-68	151.319
GOBP_NEGATIVE_REGULATION_OF_SOMATIC_STEM_CELL_POPULATION_MAINTENANCE	0.461345	-0.486346	19.4151	3.25129e-71	4.97057e-68	151.319
GOBP_METANEPHRIC_DISTAL_TUBULE_DEVELOPMENT	0.405799	-0.461259	18.9524	2.06829e-68	2.63501e-65	144.911
GOBP_DISTAL_TUBULE_DEVELOPMENT	0.289908	-0.195531	18.6792	9.04227e-67	9.87416e-64	141.161
GOBP_ACUTE_PHASE_RESPONSE	0.153913	-0.269412	18.6265	1.86931e-66	1.78613e-63	140.44
GOBP_NEGATIVE_REGULATION_OF_APOPTOTIC_PROCESS_INVOLVED_IN_DEVELOPMENT	0.322885	-0.133439	18.52	8.08784e-66	6.86927e-63	138.987
GOBP_LEUKOTRIENE_TRANSPORT	0.312102	-0.430293	17.8324	9.3416e-62	7.14072e-59	129.702
GOBP_CYTOPLASMIC_TRANSLATION	-0.205086	-0.56187	-17.751	2.79559e-61	1.94268e-58	128.614
GOBP_METANEPHRIC_NEPHRON_TUBULE_EPITHELIAL_CELL_DIFFERENTIATION	0.414736	-0.490003	17.669	8.41381e-61	5.3596e-58	127.521
GOBP_MESENCHYMAL_CELL_APOPTOTIC_PROCESS	0.262462	-0.264546	17.6548	1.01743e-60	5.98251e-58	127.332
GOBP_REGULATION_OF_THYROID_HORMONE_GENERATION	0.515335	-0.440431	17.6123	1.79896e-60	9.82233e-58	126.767
GOBP_B_CELL_MEDIATED_IMMUNITY	0.0521084	-0.570684	17.5517	4.0475e-60	2.06261e-57	125.962
GOBP_PEPTIDE_BIOSYNTHETIC_PROCESS	-0.0943273	-0.390309	-17.4151	2.50428e-59	1.19642e-56	124.153
GOBP_NEGATIVE_REGULATION_OF_MESENCHYMAL_CELL_APOPTOTIC_PROCESS	0.302892	-0.339625	17.1945	4.68213e-58	2.10531e-55	121.247
GOBP_HUMORAL_IMMUNE_RESPONSE_MEDIATED_BY_CIRCULATING_IMMUNOGLOBULIN	0.0866564	-0.455296	16.676	4.21774e-55	1.79113e-52	114.497
GOBP_COCHLEA_MORPHOGENESIS	0.202755	0.0602469	16.5815	1.44055e-54	5.79555e-52	113.278
GOBP_MYOBLAST_PROLIFERATION	0.374428	0.0216611	16.4882	4.81796e-54	1.84142e-51	112.08
GOBP_MODULATION_OF_PROCESS_OF_ANOTHER_ORGANISM	0.282667	-0.348528	16.3483	2.92899e-53	1.06615e-50	110.289
GOBP_REGULATION_OF_KIDNEY_DEVELOPMENT	0.189255	-0.23355	15.9328	5.92108e-51	2.05731e-48	105.023
GOBP_AMIDE_BIOSYNTHETIC_PROCESS	-0.0788394	-0.373205	-15.808	2.87206e-50	9.54522e-48	103.456
GOBP_CELL_MORPHOGENESIS	0.0459946	-0.187508	15.7799	4.09554e-50	1.30443e-47	103.104
GOBP_CIRCULATORY_SYSTEM_PROCESS	0.0508552	-0.129301	15.7011	1.10525e-49	3.3794e-47	102.12
GOBP_ADAPTIVE_IMMUNE_RESPONSE_BASED_ON_SOMATIC_RECOMBINATION_OF_IMMUNE_RECEPTORS_BUILT_FROM_IMMUNOGLOBULIN_SUPERFAMILY_DOMAINS	0.0363374	-0.495153	15.6504	2.0905e-49	6.14607e-47	101.488
GOBP_POSITIVE_REGULATION_OF_EPITHELIAL_CELL_DIFFERENTIATION_INVOLVED_IN_KIDNEY_DEVELOPMENT	0.368891	-0.459332	15.3046	1.55701e-47	4.40807e-45	97.2124
GOBP_REGULATION_OF_MYOBLAST_PROLIFERATION	0.463223	-0.20785	15.2817	2.06904e-47	5.64847e-45	96.9304
GOBP_REGULATION_OF_ANATOMICAL_STRUCTURE_MORPHOGENESIS	0.0424633	-0.164591	15.2766	2.20289e-47	5.80651e-45	96.8683
GOBP_METANEPHRIC_S_SHAPED_BODY_MORPHOGENESIS	0.282933	-0.145995	15.2017	5.5539e-47	1.41513e-44	95.9512
GOBP_POSITIVE_REGULATION_OF_MYOBLAST_PROLIFERATION	0.464568	-0.213191	15.1953	6.01432e-47	1.48301e-44	95.8722
GOBP_CARDIAC_MUSCLE_MYOBLAST_PROLIFERATION	0.564764	-0.177194	15.1306	1.33329e-46	3.18489e-44	95.0828
GOBP_RETINAL_PIGMENT_EPITHELIUM_DEVELOPMENT	0.390285	-0.292009	15.1184	1.55026e-46	3.59097e-44	94.9333
GOBP_CARBOHYDRATE_TRANSPORT	0.0801231	-0.183004	15.0296	4.60885e-46	1.03618e-43	93.8528
GOBP_ACUTE_INFLAMMATORY_RESPONSE	0.0940363	-0.251645	15.0058	6.16939e-46	1.34739e-43	93.5637
GOBP_EPITHELIAL_CELL_MORPHOGENESIS	0.193425	-0.40012	14.9577	1.11063e-45	2.35824e-43	92.9807
GOBP_CELLULAR_RESPONSE_TO_HISTAMINE	0.264493	-0.253513	14.9365	1.43854e-45	2.97195e-43	92.7242
GOBP_OTIC_VESICLE_DEVELOPMENT	0.18032	0.064992	14.909	2.01211e-45	4.04752e-43	92.3915
GOBP_CELLULAR_MACROMOLECULE_BIOSYNTHETIC_PROCESS	-0.0543408	-0.314215	-14.8917	2.48271e-45	4.86612e-43	92.1831
GOBP_TUBE_MORPHOGENESIS	0.055223	-0.208213	14.8803	2.85272e-45	5.45154e-43	92.0453
GOBP_ZINC_ION_IMPORT_ACROSS_PLASMA_MEMBRANE	0.271527	-0.488424	14.3895	1.05549e-42	1.96784e-40	86.1826
GOBP_PEPTIDE_METABOLIC_PROCESS	-0.0683365	-0.382721	-14.38	1.18099e-42	2.14941e-40	86.0712
GOBP_REGULATION_OF_SOMATIC_STEM_CELL_POPULATION_MAINTENANCE	0.272909	-0.375453	14.3772	1.22172e-42	2.17183e-40	86.0376
GOBP_REGULATION_OF_SYSTEMIC_ARTERIAL_BLOOD_PRESSURE_MEDIATED_BY_A_CHEMICAL_SIGNAL	0.190515	-0.199523	14.3482	1.7253e-42	2.99731e-40	85.6955
GOBP_CARBOXYLIC_ACID_TRANSPORT	0.0590235	-0.111926	14.2966	3.18659e-42	5.41296e-40	85.0873
GOBP_REGULATION_OF_MEMBRANE_INVAGINATION	0.209887	0.0374594	14.2864	3.59668e-42	5.97675e-40	84.9673
GOBP_REGULATION_OF_KIDNEY_SIZE	0.342891	-0.492269	14.2536	5.30667e-42	8.63067e-40	84.5818
GOBP_PEPTIDE_CATABOLIC_PROCESS	0.119563	-0.0514357	14.2306	6.96703e-42	1.1095e-39	84.312
GOBP_REGULATION_OF_MESENCHYMAL_TO_EPITHELIAL_TRANSITION_INVOLVED_IN_METANEPHROS_MORPHOGENESIS	0.339786	-0.539245	14.1876	1.15794e-41	1.80638e-39	83.8084
GOBP_NEGATIVE_REGULATION_OF_STEM_CELL_POPULATION_MAINTENANCE	0.316032	-0.431523	14.1542	1.71738e-41	2.62553e-39	83.4177
GOBP_BIOLOGICAL_ADHESION	0.0338921	-0.243555	14.0236	7.97922e-41	1.18967e-38	81.8953
GOBP_RESPONSE_TO_HISTAMINE	0.20734	-0.294257	14.0224	8.09298e-41	1.18967e-38	81.8813
GOBP_TUBE_DEVELOPMENT	0.0476459	-0.214063	13.9142	2.86685e-40	4.13475e-38	80.6278
GOBP_ANION_TRANSPORT	0.0464706	-0.169955	13.9014	3.3293e-40	4.71282e-38	80.4796
GOBP_CELL_DIFFERENTIATION_INVOLVED_IN_METANEPHROS_DEVELOPMENT	0.158581	-0.242036	13.8884	3.8725e-40	5.38207e-38	80.3298
GOBP_REGULATION_OF_CELL_ADHESION	0.0390907	-0.33826	13.8767	4.43717e-40	6.05674e-38	80.1949
GOBP_REGULATION_OF_UBIQUITIN_PROTEIN_LIGASE_ACTIVITY	-0.203392	-0.382589	-13.8397	6.82178e-40	9.14837e-38	79.7687
GOBP_LYMPHOCYTE_MEDIATED_IMMUNITY	0.0307269	-0.520051	13.8361	7.11532e-40	9.37751e-38	79.7269
GOBP_STEROL_METABOLIC_PROCESS	0.0771244	-0.325914	13.8226	8.32414e-40	1.07847e-37	79.5714
GOBP_MESENCHYMAL_TO_EPITHELIAL_TRANSITION_INVOLVED_IN_METANEPHROS_MORPHOGENESIS	0.236395	-0.377708	13.7945	1.15258e-39	1.46839e-37	79.249
GOBP_URONIC_ACID_METABOLIC_PROCESS	0.219706	-0.017609	13.7675	1.5771e-39	1.97628e-37	78.9382
GOBP_COMPLEMENT_ACTIVATION_ALTERNATIVE_PATHWAY	0.109104	-0.548203	13.6898	3.87097e-39	4.77253e-37	78.0485
GOBP_VASCULAR_TRANSPORT	0.0890856	-0.186998	13.6846	4.11255e-39	4.98989e-37	77.9885
GOBP_URETER_DEVELOPMENT	0.212549	-0.0404711	13.5982	1.11103e-38	1.32698e-36	77.0037
GOBP_POSITIVE_REGULATION_OF_G_PROTEIN_COUPLED_RECEPTOR_SIGNALING_PATHWAY	0.215041	0.00968473	13.5894	1.22934e-38	1.44571e-36	76.9035
GOBP_THYROID_HORMONE_GENERATION	0.17325	-0.0362785	13.5208	2.6975e-38	3.12419e-36	76.1249
GOBP_BRANCHING_MORPHOGENESIS_OF_AN_EPITHELIAL_TUBE	0.0626461	-0.176923	13.4883	3.91287e-38	4.46417e-36	75.7563
GOBP_MICROGLIAL_CELL_PROLIFERATION	0.30707	-0.327538	13.4823	4.18815e-38	4.70797e-36	75.689
GOBP_HUMORAL_IMMUNE_RESPONSE	0.0589253	-0.429521	13.445	6.41657e-38	7.10845e-36	75.2663
GOBP_RIBOSOMAL_LARGE_SUBUNIT_BIOGENESIS	-0.146374	-0.422497	-13.4158	8.94162e-38	9.76425e-36	74.9376
GOBP_REGULATION_OF_APOPTOTIC_PROCESS_INVOLVED_IN_DEVELOPMENT	0.225936	-0.21628	13.4037	1.02694e-37	1.10563e-35	74.8004
GOBP_REGULATION_OF_EPITHELIAL_CELL_DIFFERENTIATION_INVOLVED_IN_KIDNEY_DEVELOPMENT	0.184671	-0.331203	13.3151	2.80623e-37	2.97928e-35	73.8045
GOBP_PROTEIN_DE_ADP_RIBOSYLATION	0.282445	-0.273779	13.3057	3.12124e-37	3.26833e-35	73.6991
GOBP_POSITIVE_REGULATION_OF_HYPERSENSITIVITY	0.243019	-0.668913	13.2432	6.32476e-37	6.5333e-35	72.9995
GOBP_POSITIVE_REGULATION_OF_APOPTOTIC_CELL_CLEARANCE	0.0665677	-0.633568	13.1901	1.14969e-36	1.17176e-34	72.4076
GOBP_METANEPHRIC_RENAL_VESICLE_MORPHOGENESIS	0.185876	-0.34841	13.1831	1.24427e-36	1.25147e-34	72.3293
GOBP_RENAL_VESICLE_DEVELOPMENT	0.160439	-0.250319	13.1122	2.75825e-36	2.73819e-34	71.5408
GOBP_CELLULAR_COMPONENT_MORPHOGENESIS	0.0379759	-0.149011	13.092	3.45752e-36	3.38837e-34	71.317
GOBP_INORGANIC_ANION_TRANSPORT	0.0597331	-0.143957	13.0762	4.12752e-36	3.99377e-34	71.1415
GOBP_TYPE_II_HYPERSENSITIVITY	0.201809	-0.630851	13.06	4.94708e-36	4.72694e-34	70.9621
GOBP_LIPID_METABOLIC_PROCESS	0.0406152	-0.240798	13.0507	5.48864e-36	5.17965e-34	70.8592
GOBP_GLYCOSIDE_TRANSPORT	0.317516	-0.457526	13.0431	5.97404e-36	5.56897e-34	70.7753
GOBP_COMPLEMENT_ACTIVATION	0.0687185	-0.451011	13.0284	7.03826e-36	6.48198e-34	70.6129
GOBP_NEGATIVE_REGULATION_OF_PEPTIDYL_CYSTEINE_S_NITROSYLATION	0.306286	-0.365108	12.9741	1.28886e-35	1.17286e-33	70.0138
GOBP_XENOBIOTIC_TRANSMEMBRANE_TRANSPORT	0.252374	-0.164695	12.9729	1.30629e-35	1.17474e-33	70.0005
GOBP_METANEPHRIC_NEPHRON_TUBULE_MORPHOGENESIS	0.317986	-0.422524	12.9233	2.26766e-35	1.99241e-33	69.4542
GOBP_METANEPHRIC_TUBULE_MORPHOGENESIS	0.317986	-0.422524	12.9233	2.26766e-35	1.99241e-33	69.4542
GOBP_POSITIVE_REGULATION_OF_MORPHOGENESIS_OF_AN_EPITHELIUM	0.119018	-0.0401317	12.9217	2.30645e-35	2.00347e-33	69.4374
GOBP_NEURON_REMODELING	0.255489	-0.287486	12.9008	2.90869e-35	2.49821e-33	69.2077
GOBP_SODIUM_ION_TRANSPORT	0.0534643	-0.0319535	12.8629	4.42546e-35	3.75869e-33	68.7921
GOBP_POSITIVE_REGULATION_OF_CELL_ADHESION	0.0341647	-0.415018	12.8386	5.7886e-35	4.86242e-33	68.5262
GOBP_INORGANIC_ION_IMPORT_ACROSS_PLASMA_MEMBRANE	0.0746053	0.00668609	12.8283	6.48179e-35	5.38552e-33	68.4141
GOBP_PATTERN_SPECIFICATION_PROCESS	0.0479516	-0.112786	12.7675	1.26666e-34	1.04111e-32	67.7507
GOBP_IMMUNOLOGICAL_MEMORY_PROCESS	0.0850754	-0.620385	12.7645	1.30908e-34	1.06453e-32	67.7181
GOBP_CENTRAL_NERVOUS_SYSTEM_MYELIN_MAINTENANCE	0.379959	-0.52183	12.7538	1.47265e-34	1.18494e-32	67.6015
GOBP_SECONDARY_ALCOHOL_METABOLIC_PROCESS	0.0793981	-0.320641	12.7413	1.6894e-34	1.34519e-32	67.4655
GOBP_REGULATION_OF_SYSTEMIC_ARTERIAL_BLOOD_PRESSURE	0.096058	-0.161409	12.7373	1.76634e-34	1.39195e-32	67.4214
GOBP_NEGATIVE_REGULATION_OF_CELLULAR_RESPONSE_TO_OXIDATIVE_STRESS	0.41231	-0.587691	12.7221	2.08584e-34	1.62696e-32	67.2568
GOBP_RIBOSOME_ASSEMBLY	-0.139664	-0.454888	-12.7148	2.26108e-34	1.74583e-32	67.1769
GOBP_REGULATION_OF_METANEPHROS_DEVELOPMENT	0.357382	-0.293483	12.6817	3.24797e-34	2.48275e-32	66.8183
GOBP_NEPHRIC_DUCT_FORMATION	0.251103	-0.368171	12.6787	3.35667e-34	2.54043e-32	66.7857
GOBP_CELL_PROJECTION_ORGANIZATION	0.0304503	-0.193098	12.6185	6.48061e-34	4.85665e-32	66.1343
GOBP_POSITIVE_REGULATION_OF_AMYLOID_PRECURSOR_PROTEIN_CATABOLIC_PROCESS	0.0981358	-0.427682	12.613	6.88484e-34	5.10949e-32	66.0744
GOBP_ADAPTIVE_IMMUNE_RESPONSE	0.0197529	-0.460258	12.6108	7.047e-34	5.13551e-32	66.0514
GOBP_METANEPHRIC_COLLECTING_DUCT_DEVELOPMENT	0.219769	-0.293812	12.6107	7.05427e-34	5.13551e-32	66.0504
GOBP_G1_TO_G0_TRANSITION_INVOLVED_IN_CELL_DIFFERENTIATION	0.158381	0.293056	12.5795	9.91447e-34	7.14964e-32	65.7134
GOBP_XENOBIOTIC_TRANSPORT	0.134286	-0.243076	12.5457	1.43259e-33	1.02343e-31	65.349
GOBP_VESTIBULOCOCHLEAR_NERVE_FORMATION	0.306547	-0.042702	12.5429	1.47586e-33	1.04458e-31	65.3195
GOBP_COLLECTING_DUCT_DEVELOPMENT	0.214772	-0.2848	12.5366	1.5801e-33	1.1081e-31	65.2519
GOBP_IMPORT_INTO_CELL	0.0558729	-0.228606	12.4998	2.35514e-33	1.63661e-31	64.8568
GOBP_UROGENITAL_SYSTEM_DEVELOPMENT	0.0502038	-0.187648	12.49	2.61985e-33	1.80416e-31	64.7514
GOBP_LEUKOCYTE_MEDIATED_IMMUNITY	0.0298854	-0.472645	12.4874	2.69521e-33	1.83948e-31	64.7233
GOBP_REGULATION_OF_SMALL_GTPASE_MEDIATED_SIGNAL_TRANSDUCTION	0.0445118	-0.202625	12.4836	2.80835e-33	1.89974e-31	64.6826
GOBP_BILE_ACID_AND_BILE_SALT_TRANSPORT	0.121303	0.0635841	12.4745	3.09731e-33	2.07683e-31	64.5856
GOBP_MESENCHYMAL_TO_EPITHELIAL_TRANSITION	0.160859	-0.255938	12.4733	3.14014e-33	2.08724e-31	64.572
GOBP_FIBRINOLYSIS	0.13321	0.0458413	12.4681	3.32014e-33	2.18786e-31	64.5169
GOBP_MESONEPHROS_DEVELOPMENT	0.0816743	-0.0836148	12.433	4.85111e-33	3.16939e-31	64.1415
GOBP_NEPHRON_TUBULE_EPITHELIAL_CELL_DIFFERENTIATION	0.181298	-0.321191	12.4262	5.22166e-33	3.38258e-31	64.0686
GOBP_SEQUESTERING_OF_EXTRACELLULAR_LIGAND_FROM_RECEPTOR	0.214402	-0.0943223	12.4007	6.87726e-33	4.41763e-31	63.796
GOBP_THYROID_HORMONE_METABOLIC_PROCESS	0.118411	0.14383	12.3822	8.39243e-33	5.34598e-31	63.5989
GOBP_COBALAMIN_TRANSPORT	0.290461	-0.606854	12.3379	1.35107e-32	8.53516e-31	63.1276
GOBP_SYNAPSE_PRUNING	0.214366	-0.218873	12.3354	1.3883e-32	8.69853e-31	63.1006
GOBP_METANEPHRIC_EPITHELIUM_DEVELOPMENT	0.155417	-0.279615	12.295	2.13933e-32	1.32951e-30	62.6726
GOBP_OVIDUCT_DEVELOPMENT	0.499726	-0.567091	12.277	2.59521e-32	1.59982e-30	62.4814
GOBP_NEGATIVE_REGULATION_OF_UBIQUITIN_PROTEIN_TRANSFERASE_ACTIVITY	-0.18317	-0.332921	-12.2732	2.7034e-32	1.65318e-30	62.441
GOBP_CELL_MORPHOGENESIS_INVOLVED_IN_DIFFERENTIATION	0.0388983	-0.143004	12.2566	3.22745e-32	1.95799e-30	62.2656
GOBP_POSITIVE_REGULATION_OF_AMYLOID_BETA_FORMATION	0.147504	-0.381063	12.2391	3.88923e-32	2.34089e-30	62.081
GOBP_METANEPHRIC_TUBULE_DEVELOPMENT	0.168759	-0.307637	12.2347	4.07635e-32	2.43434e-30	62.0345
GOBP_LOCOMOTION	0.0316559	-0.177285	12.2166	4.9449e-32	2.93014e-30	61.8433
GOBP_MACROPHAGE_PROLIFERATION	0.212653	-0.39342	12.2142	5.0735e-32	2.98322e-30	61.8179
GOBP_ANATOMICAL_STRUCTURE_FORMATION_INVOLVED_IN_MORPHOGENESIS	0.0362031	-0.218931	12.2133	5.12183e-32	2.98865e-30	61.8085
GOBP_REGULATION_OF_CELLULAR_COMPONENT_MOVEMENT	0.0382039	-0.20267	12.1783	7.43597e-32	4.30611e-30	61.4396
GOBP_REGULATION_OF_GLOMERULUS_DEVELOPMENT	0.362375	-0.339609	12.1346	1.1829e-31	6.79856e-30	60.9801
GOBP_REGULATION_OF_CARDIAC_MUSCLE_TISSUE_DEVELOPMENT	0.322908	-0.388371	12.1268	1.28513e-31	7.33101e-30	60.8981
GOBP_AXON_DEVELOPMENT	0.043695	-0.134732	12.1146	1.46189e-31	8.27754e-30	60.7706
GOBP_APOPTOTIC_PROCESS_INVOLVED_IN_MORPHOGENESIS	0.149849	-0.142391	12.1099	1.53697e-31	8.6387e-30	60.721
GOBP_POSITIVE_REGULATION_OF_SPROUTING_ANGIOGENESIS	0.181335	-0.276764	12.1052	1.61628e-31	9.01815e-30	60.6712
GOBP_MODIFIED_AMINO_ACID_TRANSPORT	0.168295	-0.245826	12.0882	1.93396e-31	1.07125e-29	60.4936
GOBP_POSITIVE_REGULATION_OF_CYTOKINE_PRODUCTION	0.0319815	-0.374802	12.0874	1.95116e-31	1.073e-29	60.4849
GOBP_ORGANONITROGEN_COMPOUND_BIOSYNTHETIC_PROCESS	-0.0420406	-0.316913	-12.0386	3.26684e-31	1.7837e-29	59.9748
GOBP_CELL_CELL_ADHESION	0.030325	-0.306327	12.0367	3.33339e-31	1.80712e-29	59.9549
GOBP_REGULATION_OF_MORPHOGENESIS_OF_A_BRANCHING_STRUCTURE	0.112357	-0.292293	11.9834	5.8377e-31	3.14249e-29	59.4004
GOBP_ANIMAL_ORGAN_MORPHOGENESIS	0.038496	-0.122636	11.879	1.74366e-30	9.32066e-29	58.3177
GOBP_ENDOTHELIAL_CELL_DEVELOPMENT	0.0960662	-0.330557	11.8648	2.02205e-30	1.07337e-28	58.1711
GOBP_RIBOSOME_BIOGENESIS	-0.0722466	-0.406215	-11.8467	2.44287e-30	1.28781e-28	57.9841
GOBP_SPECIFICATION_OF_ANIMAL_ORGAN_IDENTITY	0.105191	0.166752	11.8328	2.82255e-30	1.47778e-28	57.8412
GOBP_PATTERN_SPECIFICATION_INVOLVED_IN_KIDNEY_DEVELOPMENT	0.32272	-0.423266	11.8103	3.56813e-30	1.85543e-28	57.6093
GOBP_CELL_JUNCTION_ORGANIZATION	0.0364923	-0.205084	11.7832	4.73177e-30	2.44389e-28	57.33
GOBP_REGULATION_OF_NUCLEOTIDE_BINDING_OLIGOMERIZATION_DOMAIN_CONTAINING_SIGNALING_PATHWAY	0.108994	-0.591665	11.7155	9.5382e-30	4.89329e-28	56.6365
GOBP_REGULATION_OF_BLOOD_PRESSURE	0.0660311	-0.166512	11.7006	1.11245e-29	5.66903e-28	56.4844
GOBP_NEGATIVE_REGULATION_OF_NON_CANONICAL_WNT_SIGNALING_PATHWAY	0.271581	-0.0743394	11.6869	1.282e-29	6.48979e-28	56.344
GOBP_EXTERNAL_ENCAPSULATING_STRUCTURE_ORGANIZATION	0.0449126	-0.10735	11.6623	1.65206e-29	8.3081e-28	56.0932
GOBP_NEGATIVE_REGULATION_OF_RESPONSE_TO_STIMULUS	0.0299814	-0.272224	11.6452	1.96915e-29	9.83802e-28	55.9195
GOBP_OPTIC_NERVE_MORPHOGENESIS	0.182837	0.279519	11.6367	2.15007e-29	1.06721e-27	55.8325
GOBP_CYTOLYSIS_BY_HOST_OF_SYMBIONT_CELLS	0.319888	0.0312888	11.5787	3.89893e-29	1.9228e-27	55.2438
GOBP_CELL_CELL_ADHESION_MEDIATED_BY_CADHERIN	0.0805347	-0.500248	11.5679	4.35598e-29	2.13443e-27	55.1342
GOBP_CHLORIDE_TRANSMEMBRANE_TRANSPORT	0.0640545	0.163299	11.5451	5.50198e-29	2.6788e-27	54.9032
GOBP_NEGATIVE_REGULATION_OF_PEPTIDASE_ACTIVITY	0.0788871	-0.28077	11.5304	6.39542e-29	3.09409e-27	54.7544
GOBP_NEGATIVE_REGULATION_OF_ACTIN_FILAMENT_DEPOLYMERIZATION	0.135768	-0.420517	11.5286	6.51608e-29	3.13263e-27	54.7359
GOBP_ORGANIC_HYDROXY_COMPOUND_METABOLIC_PROCESS	0.0412876	-0.221404	11.5042	8.35445e-29	3.99134e-27	54.4901
GOBP_INORGANIC_ANION_TRANSMEMBRANE_TRANSPORT	0.068011	-0.0198155	11.4975	8.94556e-29	4.2472e-27	54.4225
GOBP_PROTEIN_EXIT_FROM_ENDOPLASMIC_RETICULUM	0.145991	-0.353494	11.4707	1.17568e-28	5.54745e-27	54.1522
GOBP_CELL_MIGRATION	0.0332856	-0.195061	11.4664	1.2284e-28	5.76067e-27	54.1088
GOBP_HOMOPHILIC_CELL_ADHESION_VIA_PLASMA_MEMBRANE_ADHESION_MOLECULES	0.0321442	0.266059	11.4518	1.42528e-28	6.6432e-27	53.9618
GOBP_NEGATIVE_REGULATION_OF_PLASMINOGEN_ACTIVATION	0.25117	-0.58119	11.4469	1.49704e-28	6.93538e-27	53.9133
GOBP_NEGATIVE_REGULATION_OF_WOUND_HEALING	0.0786614	-0.0609642	11.4359	1.67407e-28	7.70878e-27	53.8027
GOBP_IMMUNE_COMPLEX_CLEARANCE	0.441435	-0.0163185	11.3988	2.43982e-28	1.11676e-26	53.4302
GOBP_RESPONSE_TO_GRAVITY	-0.236917	0.446192	-11.3859	2.7804e-28	1.26508e-26	53.301
GOBP_CYTOSKELETON_ORGANIZATION	0.0320318	-0.243385	11.3776	3.02468e-28	1.36808e-26	53.2178
GOBP_IMPORT_ACROSS_PLASMA_MEMBRANE	0.0626784	-0.170348	11.3658	3.40674e-28	1.53183e-26	53.1001
GOBP_POSITIVE_REGULATION_OF_TRANSFORMING_GROWTH_FACTOR_BETA_PRODUCTION	0.142748	-0.323291	11.3437	4.25758e-28	1.90321e-26	52.8797
GOBP_MORPHOGENESIS_OF_A_BRANCHING_STRUCTURE	0.0609565	-0.20091	11.3402	4.41178e-28	1.96068e-26	52.8445
GOBP_SUPRAMOLECULAR_FIBER_ORGANIZATION	0.0368479	-0.252497	11.336	4.60255e-28	2.03364e-26	52.8027
GOBP_NEGATIVE_REGULATION_OF_PROTEIN_CONTAINING_COMPLEX_DISASSEMBLY	0.0948217	-0.290462	11.3332	4.73381e-28	2.07961e-26	52.7748
GOBP_NEUTRAL_AMINO_ACID_TRANSPORT	0.114745	-0.139764	11.3184	5.49446e-28	2.39998e-26	52.6275
GOBP_CRANIAL_NERVE_FORMATION	0.17379	0.114553	11.3157	5.65119e-28	2.45442e-26	52.5997
GOBP_CIRCULATORY_SYSTEM_DEVELOPMENT	0.043349	-0.168973	11.3005	6.58485e-28	2.84376e-26	52.4485
GOBP_EPITHELIUM_DEVELOPMENT	0.0333139	-0.186882	11.2825	7.89125e-28	3.3888e-26	52.2696
GOBP_LIPID_BIOSYNTHETIC_PROCESS	0.0339041	-0.24858	11.2373	1.24253e-27	5.30611e-26	51.8207
GOBP_REGULATION_OF_INFLAMMATORY_RESPONSE_TO_ANTIGENIC_STIMULUS	0.102456	-0.491884	11.2314	1.31822e-27	5.59803e-26	51.7623
GOBP_SEQUESTERING_OF_BMP_IN_EXTRACELLULAR_MATRIX	0.141115	0.222558	11.2086	1.65546e-27	6.99135e-26	51.537
GOBP_CELL_PROLIFERATION_IN_FOREBRAIN	0.166978	-0.172052	11.1954	1.88971e-27	7.93678e-26	51.4062
GOBP_ORGANIC_ANION_TRANSPORT	0.0402771	-0.150202	11.1922	1.95131e-27	8.15071e-26	51.3745
GOBP_CADMIUM_ION_TRANSMEMBRANE_TRANSPORT	0.323314	-0.375623	11.1768	2.27526e-27	9.45223e-26	51.2227
GOBP_RIBONUCLEOPROTEIN_COMPLEX_BIOGENESIS	-0.0590649	-0.430459	-11.1672	2.50405e-27	1.03465e-25	51.1279
GOBP_POSITIVE_REGULATION_OF_GLUCOSE_TRANSMEMBRANE_TRANSPORT	0.117122	-0.211954	11.1439	3.15846e-27	1.29267e-25	50.8984
GOBP_GLAND_DEVELOPMENT	0.0492237	-0.196577	11.1438	3.16235e-27	1.29267e-25	50.8972
GOBP_REGIONALIZATION	0.0452539	-0.114989	11.1406	3.26408e-27	1.32716e-25	50.8659
GOBP_MONOCARBOXYLIC_ACID_TRANSPORT	0.0665367	-0.162737	11.124	3.85066e-27	1.55738e-25	50.7025
GOBP_CELLULAR_AMIDE_METABOLIC_PROCESS	-0.0465101	-0.35814	-11.1073	4.54506e-27	1.82855e-25	50.5386
GOBP_REGULATION_OF_SMOOTHENED_SIGNALING_PATHWAY	0.0862503	-0.210295	11.1061	4.59982e-27	1.84089e-25	50.5268
GOBP_STEROID_METABOLIC_PROCESS	0.0539841	-0.265333	11.0906	5.36554e-27	2.13615e-25	50.3746
GOBP_GLAND_MORPHOGENESIS	0.0673361	-0.234484	11.0859	5.6213e-27	2.22639e-25	50.3286
GOBP_POSITIVE_REGULATION_OF_BLOOD_VESSEL_ENDOTHELIAL_CELL_PROLIFERATION_INVOLVED_IN_SPROUTING_ANGIOGENESIS	0.312434	0.0351212	11.0646	6.94379e-27	2.736e-25	50.1197
GOBP_CELL_CELL_JUNCTION_ORGANIZATION	0.0625291	-0.224189	11.0553	7.61267e-27	2.98417e-25	50.0288
GOBP_EXTRACELLULAR_REGULATION_OF_SIGNAL_TRANSDUCTION	0.193116	-0.114509	11.0289	9.88485e-27	3.85509e-25	49.7706
GOBP_WOUND_HEALING	0.0425781	-0.208435	11.0125	1.16148e-26	4.5068e-25	49.6112
GOBP_NEURON_MATURATION	0.117141	-0.189482	11.0067	1.23013e-26	4.74903e-25	49.5545
GOBP_NEGATIVE_REGULATION_OF_RESPONSE_TO_WOUNDING	0.0754407	-0.04432	11.0046	1.25584e-26	4.82395e-25	49.534
GOBP_METANEPHRIC_MESENCHYMAL_CELL_DIFFERENTIATION	0.259844	-0.342487	11.0002	1.3122e-26	5.01524e-25	49.4906
GOBP_IMMUNE_EFFECTOR_PROCESS	0.0256547	-0.415591	10.9881	1.4788e-26	5.62384e-25	49.3725
GOBP_LEUKOCYTE_PROLIFERATION	0.0325501	-0.376621	10.9694	1.77704e-26	6.72459e-25	49.1909
GOBP_NEGATIVE_REGULATION_OF_HYDROLASE_ACTIVITY	0.0606783	-0.295255	10.949	2.17232e-26	8.17993e-25	48.9924
GOBP_REGULATION_OF_SYSTEMIC_ARTERIAL_BLOOD_PRESSURE_BY_RENIN_ANGIOTENSIN	0.201031	-0.334656	10.9215	2.84444e-26	1.06583e-24	48.726
GOBP_CELL_MORPHOGENESIS_INVOLVED_IN_NEURON_DIFFERENTIATION	0.0343271	-0.114276	10.9059	3.31411e-26	1.23576e-24	48.575
GOBP_STRIATED_MUSCLE_CELL_DIFFERENTIATION	0.0543998	-0.232914	10.8996	3.52448e-26	1.30782e-24	48.5142
GOBP_REGULATION_OF_PROTEIN_DEPOLYMERIZATION	0.097074	-0.235538	10.8952	3.68094e-26	1.35928e-24	48.4713
GOBP_VASCULAR_PROCESS_IN_CIRCULATORY_SYSTEM	0.0470683	-0.141908	10.8702	4.70167e-26	1.72786e-24	48.2294
GOBP_CARBOHYDRATE_TRANSMEMBRANE_TRANSPORT	0.0651049	-0.194177	10.8636	5.01608e-26	1.82862e-24	48.1654
GOBP_POSITIVE_REGULATION_OF_TRANSLATION	-0.0741435	-0.367274	-10.8634	5.02367e-26	1.82862e-24	48.1639
GOBP_CELLULAR_LIPID_METABOLIC_PROCESS	0.0347753	-0.258159	10.8625	5.06741e-26	1.8358e-24	48.1554
GOBP_ESTABLISHMENT_OF_BLOOD_BRAIN_BARRIER	0.164036	-0.375474	10.8316	6.85412e-26	2.47136e-24	47.8569
GOBP_REGULATION_OF_CELL_CELL_ADHESION	0.0303174	-0.431687	10.8084	8.58634e-26	3.06817e-24	47.6343
GOBP_AXON_ENSHEATHMENT_IN_CENTRAL_NERVOUS_SYSTEM	0.135214	-0.0489673	10.8084	8.5896e-26	3.06817e-24	47.6339
GOBP_REGULATION_OF_IMMUNE_RESPONSE	0.0258518	-0.34077	10.8063	8.76714e-26	3.11702e-24	47.6137
GOBP_CERAMIDE_METABOLIC_PROCESS	0.059388	-0.256517	10.8002	9.30202e-26	3.29188e-24	47.5552
GOBP_CELLULAR_GLUCOSE_HOMEOSTASIS	0.0686903	-0.257571	10.7718	1.22538e-25	4.3165e-24	47.2829
GOBP_POSITIVE_REGULATION_OF_INFLAMMATORY_RESPONSE_TO_ANTIGENIC_STIMULUS	0.118902	-0.62336	10.769	1.25914e-25	4.41508e-24	47.256
GOBP_PEPTIDYL_SERINE_MODIFICATION	0.0473073	-0.208402	10.7621	1.34671e-25	4.70056e-24	47.1896
GOBP_ACTIVATION_OF_IMMUNE_RESPONSE	0.0322104	-0.361758	10.7301	1.8352e-25	6.37649e-24	46.8838
GOBP_RESPONSE_TO_THYROID_HORMONE	0.111864	-0.442337	10.7098	2.2349e-25	7.73013e-24	46.6891
GOBP_CELL_PART_MORPHOGENESIS	0.0327669	-0.154887	10.6987	2.48752e-25	8.56302e-24	46.5833
GOBP_POLYOL_TRANSPORT	0.187233	0.00518552	10.6982	2.49811e-25	8.56302e-24	46.5791
GOBP_PROTEIN_TARGETING_TO_VACUOLE	0.132149	-0.350758	10.6804	2.96819e-25	1.0129e-23	46.4088
GOBP_RESPONSE_TO_HYDROPEROXIDE	0.128868	-0.458525	10.6659	3.41325e-25	1.1596e-23	46.2708
GOBP_MESONEPHRIC_TUBULE_MORPHOGENESIS	0.0824855	-0.11914	10.6468	4.0987e-25	1.3863e-23	46.09
GOBP_IMMUNOLOGICAL_MEMORY_FORMATION_PROCESS	0.067075	-0.646312	10.6332	4.67256e-25	1.57344e-23	45.9605
GOBP_STRIATED_MUSCLE_CELL_DEVELOPMENT	0.0964649	-0.155739	10.6324	4.70797e-25	1.57841e-23	45.9531
GOBP_NEGATIVE_REGULATION_OF_FATTY_ACID_OXIDATION	0.140975	0.101882	10.615	5.56402e-25	1.85727e-23	45.788
GOBP_ACTIN_FILAMENT_BASED_PROCESS	0.035851	-0.236779	10.6139	5.62236e-25	1.86858e-23	45.7777
GOBP_AMYLOID_BETA_CLEARANCE	0.1179	-0.439913	10.6113	5.76377e-25	1.90728e-23	45.7532
GOBP_REGULATION_OF_EXTRACELLULAR_MATRIX_ORGANIZATION	0.0676535	-0.345825	10.6098	5.8507e-25	1.92771e-23	45.7384
GOBP_NEGATIVE_REGULATION_OF_FIBRINOLYSIS	0.130123	-0.149244	10.5859	7.35566e-25	2.41316e-23	45.5123
GOBP_SODIUM_ION_TRANSMEMBRANE_TRANSPORT	0.0506828	-0.0183205	10.562	9.24543e-25	3.02017e-23	45.2864
GOBP_REGULATION_OF_COMPLEMENT_ACTIVATION	0.237724	-0.334932	10.555	9.88479e-25	3.21529e-23	45.2204
GOBP_POSITIVE_REGULATION_OF_MULTICELLULAR_ORGANISMAL_PROCESS	0.0252114	-0.253863	10.5531	1.00649e-24	3.26002e-23	45.2025
GOBP_NEGATIVE_REGULATION_OF_UBIQUITIN_PROTEIN_LIGASE_ACTIVITY	-0.220419	-0.55324	-10.5464	1.07341e-24	3.46209e-23	45.139
GOBP_LEUKOTRIENE_B4_CATABOLIC_PROCESS	0.0585058	0.522239	10.5303	1.25119e-24	4.01854e-23	44.9876
GOBP_URATE_TRANSPORT	0.271608	-0.128651	10.5198	1.38306e-24	4.42347e-23	44.8886
GOBP_RIBOSOMAL_LARGE_SUBUNIT_ASSEMBLY	-0.1536	-0.485519	-10.5182	1.40383e-24	4.47121e-23	44.8739
GOBP_REGULATION_OF_HYPERSENSITIVITY	0.228425	-0.48561	10.5101	1.51676e-24	4.81083e-23	44.7975
GOBP_B_CELL_CHEMOTAXIS	0.213561	-0.153994	10.4979	1.70299e-24	5.37918e-23	44.6831
GOBP_REGULATION_OF_UBIQUITIN_PROTEIN_TRANSFERASE_ACTIVITY	-0.0985863	-0.286575	-10.4788	2.04257e-24	6.42528e-23	44.5035
GOBP_POSITIVE_REGULATION_OF_OSTEOBLAST_PROLIFERATION	0.214352	-0.300552	10.4748	2.12187e-24	6.64736e-23	44.4659
GOBP_CELL_CELL_ADHESION_VIA_PLASMA_MEMBRANE_ADHESION_MOLECULES	0.039112	0.143345	10.4718	2.18314e-24	6.81141e-23	44.4378
GOBP_INTESTINAL_ABSORPTION	0.0961662	-0.188657	10.4637	2.3577e-24	7.32613e-23	44.3618
GOBP_NEPHRON_TUBULE_FORMATION	0.186134	-0.390469	10.4574	2.50301e-24	7.74615e-23	44.3028
GOBP_POSITIVE_REGULATION_OF_LEUKOCYTE_PROLIFERATION	0.0367868	-0.450364	10.452	2.63427e-24	8.1195e-23	44.2523
GOBP_CELLULAR_RESPONSE_TO_CARBOHYDRATE_STIMULUS	0.0676914	-0.263836	10.4421	2.8944e-24	8.88546e-23	44.1593
GOBP_URETER_MORPHOGENESIS	0.326014	-0.160528	10.4376	3.01896e-24	9.23079e-23	44.1177
GOBP_NEURAL_PRECURSOR_CELL_PROLIFERATION	0.0692628	-0.163366	10.4199	3.57067e-24	1.08742e-22	43.9519
GOBP_DEFENSE_RESPONSE	0.0246111	-0.317356	10.4158	3.70969e-24	1.12527e-22	43.9142
GOBP_PROTEIN_RETENTION_IN_GOLGI_APPARATUS	0.201222	-0.456203	10.4072	4.02349e-24	1.21564e-22	43.834
GOBP_RETINAL_GANGLION_CELL_AXON_GUIDANCE	0.124852	0.0401336	10.4023	4.21627e-24	1.26887e-22	43.7878
GOBP_RENAL_WATER_TRANSPORT	0.341169	-0.390003	10.4007	4.27867e-24	1.28259e-22	43.7733
GOBP_NEGATIVE_REGULATION_OF_PROTEOLYSIS	0.0567905	-0.300105	10.3618	6.17776e-24	1.84464e-22	43.4106
GOBP_BLOOD_VESSEL_MORPHOGENESIS	0.0472756	-0.16568	10.348	7.03545e-24	2.09257e-22	43.2822
GOBP_BRUSH_BORDER_ASSEMBLY	0.194075	-0.42733	10.3417	7.46311e-24	2.20939e-22	43.224
GOBP_EPITHELIAL_CELL_DIFFERENTIATION	0.0402565	-0.187405	10.3414	7.48603e-24	2.20939e-22	43.2209
GOBP_NEURONAL_SIGNAL_TRANSDUCTION	0.201608	0.202588	10.3157	9.53031e-24	2.80191e-22	42.9825
GOBP_NEGATIVE_REGULATION_OF_T_CELL_PROLIFERATION	0.0470733	-0.393661	10.3115	9.90588e-24	2.90117e-22	42.9444
GOBP_POSITIVE_REGULATION_OF_ASPARTIC_TYPE_PEPTIDASE_ACTIVITY	0.142336	-0.549842	10.3072	1.03157e-23	3.00965e-22	42.9044
GOBP_NEGATIVE_REGULATION_OF_COLLAGEN_METABOLIC_PROCESS	0.21042	0.338145	10.3062	1.04145e-23	3.02693e-22	42.8949
GOBP_MITOCHONDRIAL_ADP_TRANSMEMBRANE_TRANSPORT	-0.433268	-0.357578	-10.2957	1.14913e-23	3.32724e-22	42.7978
GOBP_CARBOHYDRATE_DERIVATIVE_TRANSPORT	0.0720827	-0.277779	10.2826	1.2996e-23	3.74873e-22	42.6763
GOBP_CYTOSOLIC_TRANSPORT	0.0684342	-0.375682	10.2804	1.32574e-23	3.80975e-22	42.6567
GOBP_MUSCLE_CELL_DIFFERENTIATION	0.0465867	-0.225279	10.2783	1.35248e-23	3.87203e-22	42.6369
GOBP_REGULATION_OF_CELL_PROJECTION_SIZE	0.180994	-0.192861	10.2727	1.42578e-23	4.06666e-22	42.5848
GOBP_TISSUE_DEVELOPMENT	0.0280151	-0.18766	10.2698	1.46491e-23	4.16273e-22	42.5581
GOBP_NEGATIVE_REGULATION_OF_LOCOMOTION	0.0374854	-0.207548	10.2545	1.68957e-23	4.78335e-22	42.4172
GOBP_HEXOSE_PHOSPHATE_TRANSPORT	0.186877	-0.496639	10.247	1.81206e-23	5.11123e-22	42.3481
GOBP_REGULATION_OF_LEUKOCYTE_PROLIFERATION	0.0308544	-0.424273	10.245	1.84563e-23	5.18677e-22	42.33
GOBP_GLYCEROL_TRANSPORT	0.264021	-0.126599	10.2351	2.02501e-23	5.67002e-22	42.2384
GOBP_RESPONSE_TO_ERYTHROPOIETIN	-0.390675	0.132265	-10.2344	2.03905e-23	5.68851e-22	42.2316
GOBP_POSITIVE_REGULATION_OF_IMMUNE_RESPONSE	0.0263325	-0.364611	10.2266	2.19141e-23	6.09132e-22	42.1605
GOBP_CYTOKINE_PRODUCTION	0.0260551	-0.335146	10.2237	2.25162e-23	6.236e-22	42.1337
GOBP_REGULATION_OF_SPROUTING_ANGIOGENESIS	0.119157	-0.341548	10.2175	2.38617e-23	6.58479e-22	42.0764
GOBP_EXTRACELLULAR_MATRIX_DISASSEMBLY	0.0543261	-0.315812	10.2082	2.60151e-23	7.15321e-22	41.9911
GOBP_MUSCLE_CELL_DEVELOPMENT	0.0613605	-0.18431	10.2011	2.78066e-23	7.6184e-22	41.9254
GOBP_CHONDROCYTE_DIFFERENTIATION	0.0644351	0.0955276	10.1513	4.41324e-23	1.20482e-21	41.4694
GOBP_PROTEIN_LOCALIZATION_TO_VACUOLE	0.105448	-0.348133	10.15	4.46562e-23	1.21478e-21	41.4578
GOBP_NEGATIVE_REGULATION_OF_POSTTRANSCRIPTIONAL_GENE_SILENCING	0.0882309	-0.517659	10.1369	5.04218e-23	1.36675e-21	41.3379
GOBP_REGULATION_OF_VASCULATURE_DEVELOPMENT	0.0506003	-0.214059	10.0708	9.28205e-23	2.50714e-21	40.7356
GOBP_CERAMIDE_BIOSYNTHETIC_PROCESS	0.0824302	-0.179267	10.0507	1.11716e-22	3.00299e-21	40.5527
GOBP_LIVER_MORPHOGENESIS	0.119363	-0.321956	10.0504	1.11964e-22	3.00299e-21	40.5505
GOBP_ANTIGEN_PROCESSING_AND_PRESENTATION_OF_EXOGENOUS_PEPTIDE_ANTIGEN_VIA_MHC_CLASS_II	0.0408127	-0.787874	10.0421	1.20825e-22	3.22934e-21	40.4754
GOBP_NEGATIVE_REGULATION_OF_CELL_ADHESION	0.0449332	-0.225495	10.0356	1.2835e-22	3.4185e-21	40.4157
GOBP_NOTCH_SIGNALING_PATHWAY	0.0472734	-0.0926201	10.0328	1.31604e-22	3.49299e-21	40.391
GOBP_ANTIGEN_PROCESSING_AND_PRESENTATION_OF_PEPTIDE_OR_POLYSACCHARIDE_ANTIGEN_VIA_MHC_CLASS_II	0.0404073	-0.770037	10.0234	1.43438e-22	3.79392e-21	40.3061
GOBP_TRANSFORMING_GROWTH_FACTOR_BETA_PRODUCTION	0.079639	-0.301485	10.0108	1.61136e-22	4.24733e-21	40.1913
GOBP_POSITIVE_REGULATION_OF_COMPLEMENT_ACTIVATION	0.461643	-0.472094	9.98502	2.03932e-22	5.35689e-21	39.9588
GOBP_REGULATION_OF_MORPHOGENESIS_OF_AN_EPITHELIUM	0.0576315	-0.127113	9.98056	2.12421e-22	5.56078e-21	39.9186
GOBP_METANEPHRIC_NEPHRON_MORPHOGENESIS	0.117289	-0.271772	9.97926	2.14968e-22	5.60824e-21	39.9068
GOBP_POSITIVE_REGULATION_OF_LYMPHOCYTE_MEDIATED_IMMUNITY	0.0317532	-0.496427	9.97685	2.19756e-22	5.71365e-21	39.8851
GOBP_EPITHELIAL_CELL_DIFFERENTIATION_INVOLVED_IN_KIDNEY_DEVELOPMENT	0.0786893	-0.149059	9.97156	2.30632e-22	5.97609e-21	39.8374
GOBP_COCHLEA_DEVELOPMENT	0.0748088	0.0509442	9.95439	2.6978e-22	6.96688e-21	39.6827
GOBP_NEUROGENESIS	0.026018	-0.190849	9.93587	3.19378e-22	8.21994e-21	39.5162
GOBP_NONRIBOSOMAL_PEPTIDE_BIOSYNTHETIC_PROCESS	0.145724	-0.276214	9.93398	3.24921e-22	8.33455e-21	39.4992
GOBP_ANATOMICAL_STRUCTURE_MATURATION	0.0471591	-0.13682	9.93077	3.3457e-22	8.55336e-21	39.4703
GOBP_REGULATION_OF_HUMORAL_IMMUNE_RESPONSE	0.128285	-0.381344	9.91856	3.73897e-22	9.5269e-21	39.3607
GOBP_ANTIGEN_PROCESSING_AND_PRESENTATION_OF_PEPTIDE_ANTIGEN	0.0341718	-0.77177	9.91594	3.82918e-22	9.72434e-21	39.3372
GOBP_ALCOHOL_METABOLIC_PROCESS	0.0446042	-0.249829	9.87254	5.67851e-22	1.4373e-20	38.9484
GOBP_POSITIVE_REGULATION_OF_BLOOD_PRESSURE_BY_EPINEPHRINE_NOREPINEPHRINE	0.501093	-0.304154	9.85319	6.76597e-22	1.7069e-20	38.7755
GOBP_ENDOTHELIAL_CELL_MORPHOGENESIS	0.162296	-0.49592	9.84538	7.26088e-22	1.82573e-20	38.7059
GOBP_ADP_TRANSPORT	-0.268709	-0.212121	-9.84193	7.49148e-22	1.87242e-20	38.675
GOBP_NEURON_DEVELOPMENT	0.0248624	-0.184709	9.84187	7.49554e-22	1.87242e-20	38.6745
GOBP_POSITIVE_REGULATION_OF_ACTIVATED_T_CELL_PROLIFERATION	-0.0783581	-0.148211	-9.83106	8.26429e-22	2.05773e-20	38.5782
GOBP_ANTIGEN_PROCESSING_AND_PRESENTATION_OF_EXOGENOUS_PEPTIDE_ANTIGEN	0.0314287	-0.799872	9.82958	8.37601e-22	2.07877e-20	38.5649
GOBP_NEGATIVE_REGULATION_OF_CELLULAR_SENESCENCE	-0.135604	0.128934	-9.82899	8.42054e-22	2.08306e-20	38.5597
GOBP_ANTIBACTERIAL_HUMORAL_RESPONSE	0.0691045	-0.528294	9.8285	8.4575e-22	2.08546e-20	38.5554
GOBP_RIBOSOMAL_SMALL_SUBUNIT_BIOGENESIS	-0.0786321	-0.50103	-9.797	1.12367e-21	2.76184e-20	38.2751
GOBP_POSITIVE_REGULATION_OF_HISTONE_DEACETYLASE_ACTIVITY	0.273617	-0.35497	9.79619	1.13187e-21	2.77308e-20	38.2679
GOBP_PROTEIN_LOCALIZATION_TO_PERINUCLEAR_REGION_OF_CYTOPLASM	0.206563	-0.509838	9.78472	1.25497e-21	3.06485e-20	38.1661
GOBP_REGULATION_OF_LEUKOCYTE_MEDIATED_IMMUNITY	0.0298343	-0.385673	9.77019	1.43026e-21	3.48181e-20	38.0371
GOBP_MEDIUM_CHAIN_FATTY_ACYL_COA_METABOLIC_PROCESS	0.230911	-0.413925	9.76478	1.50142e-21	3.64345e-20	37.9892
GOBP_MESENCHYMAL_CELL_DIFFERENTIATION_INVOLVED_IN_KIDNEY_DEVELOPMENT	0.175099	-0.0513408	9.75461	1.645e-21	3.97923e-20	37.8991
GOBP_TRANSLATIONAL_ELONGATION	-0.0922536	-0.300009	-9.75347	1.66192e-21	4.00404e-20	37.889
GOBP_NEGATIVE_REGULATION_OF_RESPONSE_TO_EXTERNAL_STIMULUS	0.0295797	-0.346111	9.75322	1.66573e-21	4.00404e-20	37.8868
GOBP_POSITIVE_REGULATION_OF_LEUKOCYTE_MEDIATED_IMMUNITY	0.0319932	-0.460294	9.73821	1.90567e-21	4.56643e-20	37.7541
GOBP_POSITIVE_REGULATION_OF_MEMORY_T_CELL_DIFFERENTIATION	0.0641786	-0.70304	9.73018	2.04787e-21	4.89186e-20	37.6831
GOBP_SLEEP	-0.11011	0.236182	-9.72741	2.09938e-21	4.99927e-20	37.6586
GOBP_REGULATION_OF_MICROVILLUS_LENGTH	0.236692	-0.372699	9.71779	2.28823e-21	5.43206e-20	37.5736
GOBP_CALCIUM_INDEPENDENT_CELL_CELL_ADHESION_VIA_PLASMA_MEMBRANE_CELL_ADHESION_MOLECULES	0.120296	-0.184464	9.71668	2.31093e-21	5.46896e-20	37.5639
GOBP_EPITHELIAL_CILIUM_MOVEMENT_INVOLVED_IN_DETERMINATION_OF_LEFT_RIGHT_ASYMMETRY	0.188148	-0.226336	9.71013	2.45052e-21	5.7814e-20	37.506
GOBP_HYPERSENSITIVITY	0.161327	-0.424558	9.70952	2.46381e-21	5.79487e-20	37.5007
GOBP_MYOTUBE_DIFFERENTIATION	0.0628571	-0.271412	9.70719	2.51588e-21	5.89919e-20	37.4801
GOBP_EPITHELIAL_CELL_DEVELOPMENT	0.057702	-0.217729	9.69968	2.69051e-21	6.28937e-20	37.4139
GOBP_REGULATION_OF_SYSTEMIC_ARTERIAL_BLOOD_PRESSURE_BY_NOREPINEPHRINE_EPINEPHRINE	0.43654	-0.249005	9.69758	2.74145e-21	6.38892e-20	37.3954
GOBP_POSITIVE_REGULATION_OF_RESPONSE_TO_CYTOKINE_STIMULUS	0.0587717	-0.44048	9.68495	3.06855e-21	7.12948e-20	37.2842
GOBP_POSITIVE_REGULATION_OF_ENDOCYTOSIS	0.0644273	-0.304373	9.67443	3.37072e-21	7.8078e-20	37.1916
GOBP_TRANSLATIONAL_INITIATION	-0.103086	-0.383355	-9.67382	3.38904e-21	7.82652e-20	37.1863
GOBP_POSITIVE_REGULATION_OF_ADAPTIVE_IMMUNE_RESPONSE	0.0341371	-0.49457	9.66611	3.63006e-21	8.35788e-20	37.1185
GOBP_HEMIDESMOSOME_ASSEMBLY	0.162623	-0.0848065	9.66455	3.68099e-21	8.4497e-20	37.1048
GOBP_REGULATION_OF_ANIMAL_ORGAN_MORPHOGENESIS	0.0522846	-0.0304952	9.66117	3.79339e-21	8.68164e-20	37.0751
GOBP_FATTY_ACID_METABOLIC_PROCESS	0.0531006	-0.25956	9.65868	3.87857e-21	8.85008e-20	37.0532
GOBP_PROTEIN_LOCALIZATION_TO_LYSOSOME	0.131637	-0.33641	9.65481	4.01439e-21	9.13273e-20	37.0193
GOBP_ESTABLISHMENT_OF_PROTEIN_LOCALIZATION_TO_VACUOLE	0.10846	-0.385154	9.65278	4.08756e-21	9.2716e-20	37.0014
GOBP_CELL_JUNCTION_ASSEMBLY	0.0350553	-0.173328	9.65155	4.13253e-21	9.34588e-20	36.9907
GOBP_HARD_PALATE_DEVELOPMENT	0.140721	-0.0368373	9.64574	4.35177e-21	9.81265e-20	36.9397
GOBP_MICROTUBULE_ANCHORING	0.10645	-0.192684	9.63626	4.73448e-21	1.06442e-19	36.8566
GOBP_ACTIVATION_OF_TRANSMEMBRANE_RECEPTOR_PROTEIN_TYROSINE_KINASE_ACTIVITY	0.0628375	0.26637	9.63085	4.96769e-21	1.11358e-19	36.8091
GOBP_REGULATION_OF_MICROVILLUS_ORGANIZATION	0.147357	-0.204988	9.62658	5.16004e-21	1.15331e-19	36.7717
GOBP_VASCULAR_ENDOTHELIAL_GROWTH_FACTOR_PRODUCTION	0.0755122	-0.105707	9.60757	6.10814e-21	1.36124e-19	36.6053
GOBP_CELLULAR_RESPONSE_TO_HYDROPEROXIDE	0.120612	-0.653866	9.60202	6.41638e-21	1.42578e-19	36.5568
GOBP_T_CELL_DIFFERENTIATION_INVOLVED_IN_IMMUNE_RESPONSE	0.0521174	-0.317678	9.59983	6.54172e-21	1.44942e-19	36.5377
GOBP_CELLULAR_COMPONENT_ASSEMBLY_INVOLVED_IN_MORPHOGENESIS	0.0704789	-0.0887661	9.58689	7.3361e-21	1.62073e-19	36.4247
GOBP_REGULATION_OF_MRNA_BINDING	-0.253317	-0.250531	-9.58436	7.50276e-21	1.65277e-19	36.4026
GOBP_ANTIGEN_PROCESSING_AND_PRESENTATION	0.0312435	-0.696876	9.55313	9.88737e-21	2.17181e-19	36.1304
GOBP_NEUROMUSCULAR_JUNCTION_DEVELOPMENT	0.0959751	-0.0700924	9.55163	1.00191e-20	2.19057e-19	36.1174
GOBP_CENTRAL_NERVOUS_SYSTEM_DEVELOPMENT	0.0270706	-0.216985	9.55151	1.00301e-20	2.19057e-19	36.1163
GOBP_NEGATIVE_REGULATION_OF_RESPONSE_TO_ENDOPLASMIC_RETICULUM_STRESS	0.0987919	-0.526089	9.53479	1.16229e-20	2.53121e-19	35.971
GOBP_T_CELL_RECEPTOR_SIGNALING_PATHWAY	0.0395513	-0.38124	9.52706	1.24426e-20	2.70202e-19	35.9038
GOBP_APOPTOTIC_PROCESS_INVOLVED_IN_DEVELOPMENT	0.0789716	0.0262741	9.5257	1.25922e-20	2.72677e-19	35.892
GOBP_KIDNEY_EPITHELIUM_DEVELOPMENT	0.0538124	-0.0994457	9.52399	1.27835e-20	2.76038e-19	35.8772
GOBP_RENAL_CONTROL_OF_PERIPHERAL_VASCULAR_RESISTANCE_INVOLVED_IN_REGULATION_OF_SYSTEMIC_ARTERIAL_BLOOD_PRESSURE	0.25699	-0.587981	9.51084	1.43522e-20	3.09038e-19	35.7631
GOBP_LIPID_LOCALIZATION	0.0333336	-0.153197	9.51051	1.43938e-20	3.09062e-19	35.7602
GOBP_MESODERMAL_CELL_FATE_SPECIFICATION	0.0922684	0.225983	9.50974	1.44911e-20	3.10281e-19	35.7536
GOBP_ACTIN_FILAMENT_DEPOLYMERIZATION	0.09873	-0.359943	9.50442	1.51846e-20	3.24221e-19	35.7075
GOBP_NEGATIVE_REGULATION_OF_CELL_AGING	-0.112774	-0.134938	-9.4993	1.58834e-20	3.38198e-19	35.6631
GOBP_B_CELL_PROLIFERATION	0.0655199	-0.14014	9.4986	1.59819e-20	3.39348e-19	35.657
GOBP_NEGATIVE_REGULATION_OF_SIGNALING	0.0279131	-0.259654	9.49416	1.66172e-20	3.51861e-19	35.6186
GOBP_MANGANESE_ION_TRANSMEMBRANE_TRANSPORT	0.153169	0.00781606	9.49031	1.71896e-20	3.62976e-19	35.5852
GOBP_POSITIVE_REGULATION_OF_RESPONSE_TO_WOUNDING	0.0795474	-0.198359	9.47978	1.88531e-20	3.97007e-19	35.4941
GOBP_RIBONUCLEOPROTEIN_COMPLEX_SUBUNIT_ORGANIZATION	-0.0542442	-0.45915	-9.47722	1.92807e-20	4.04895e-19	35.472
GOBP_XENOBIOTIC_EXPORT	0.153983	-0.335748	9.47431	1.97799e-20	4.1424e-19	35.4468
GOBP_MANGANESE_ION_TRANSPORT	0.147595	0.0156254	9.46161	2.2109e-20	4.61751e-19	35.3371
GOBP_SPHINGOLIPID_BIOSYNTHETIC_PROCESS	0.0633708	-0.197416	9.4491	2.46668e-20	5.13768e-19	35.2292
GOBP_PRESYNAPTIC_MODULATION_OF_CHEMICAL_SYNAPTIC_TRANSMISSION	-0.121062	0.118697	-9.43925	2.68858e-20	5.58464e-19	35.1443
GOBP_REGULATION_OF_ENDODEOXYRIBONUCLEASE_ACTIVITY	-0.271018	-0.363919	-9.4366	2.75164e-20	5.70015e-19	35.1214
GOBP_POSITIVE_REGULATION_OF_MAPK_CASCADE	0.031498	-0.214628	9.43185	2.86815e-20	5.92544e-19	35.0805
GOBP_RESPONSE_TO_MONOSACCHARIDE	0.0546667	-0.208858	9.4309	2.89203e-20	5.95868e-19	35.0724
GOBP_CEREBRAL_CORTEX_REGIONALIZATION	0.352001	-0.473706	9.42956	2.92601e-20	6.01247e-19	35.0609
GOBP_RENAL_TUBULE_DEVELOPMENT	0.0640782	-0.140424	9.42355	3.08387e-20	6.31987e-19	35.0091
GOBP_NEGATIVE_REGULATION_OF_PROTEIN_MATURATION	0.130311	-0.414427	9.40549	3.60978e-20	7.37785e-19	34.8539
GOBP_REGULATION_OF_LYMPHOCYTE_MEDIATED_IMMUNITY	0.0261446	-0.456873	9.40504	3.6242e-20	7.38757e-19	34.8499
GOBP_NEURON_DIFFERENTIATION	0.0248705	-0.179516	9.39904	3.81852e-20	7.76297e-19	34.7985
GOBP_MULTICELLULAR_ORGANISM_GROWTH	0.0565687	-0.171987	9.39746	3.8717e-20	7.85021e-19	34.7848
GOBP_RESPONSE_TO_THYROXINE	0.315213	-0.583499	9.3964	3.90735e-20	7.90152e-19	34.7758
GOBP_POSITIVE_REGULATION_OF_RECEPTOR_CLUSTERING	0.230232	-0.131843	9.38011	4.50256e-20	9.08116e-19	34.636
GOBP_POSITIVE_REGULATION_OF_ALPHA_BETA_T_CELL_ACTIVATION	0.0456021	-0.478279	9.36148	5.29407e-20	1.06494e-18	34.4764
GOBP_POSITIVE_REGULATION_OF_HUMORAL_IMMUNE_RESPONSE	0.117769	-0.540752	9.35784	5.46388e-20	1.09622e-18	34.4453
GOBP_POSITIVE_REGULATION_OF_STRESS_ACTIVATED_PROTEIN_KINASE_SIGNALING_CASCADE	0.056163	-0.233662	9.35289	5.70346e-20	1.14129e-18	34.403
GOBP_REGULATION_OF_PROTEIN_CATABOLIC_PROCESS_IN_THE_VACUOLE	0.162837	-0.395994	9.33321	6.76473e-20	1.35012e-18	34.2349
GOBP_IMMUNE_RESPONSE	0.0189547	-0.345214	9.33123	6.88165e-20	1.36988e-18	34.218
GOBP_RIBOSOMAL_SMALL_SUBUNIT_EXPORT_FROM_NUCLEUS	-0.260671	-0.260995	-9.32406	7.32245e-20	1.45384e-18	34.1568
GOBP_ORGANIC_ACID_TRANSPORT	0.0365423	-0.0995269	9.31819	7.70405e-20	1.52564e-18	34.1067
GOBP_REGULATION_OF_HISTONE_DEACETYLASE_ACTIVITY	0.20078	-0.371861	9.29751	9.21147e-20	1.81944e-18	33.9306
GOBP_REGULATION_OF_FIBRINOLYSIS	0.0811935	0.10845	9.2817	1.0558e-19	2.08004e-18	33.7962
GOBP_GOLGI_ORGANIZATION	0.0679873	-0.294993	9.28129	1.05956e-19	2.08207e-18	33.7927
GOBP_REGULATION_OF_AXONOGENESIS	0.0450014	-0.0328228	9.25917	1.28191e-19	2.51254e-18	33.605
GOBP_FOREBRAIN_REGIONALIZATION	0.181621	-0.152017	9.25756	1.29984e-19	2.54118e-18	33.5913
GOBP_POSITIVE_REGULATION_OF_REGULATORY_T_CELL_DIFFERENTIATION	0.0464305	-0.734548	9.24513	1.4464e-19	2.82049e-18	33.486
GOBP_RESPONSE_TO_L_PHENYLALANINE_DERIVATIVE	0.264625	-0.479733	9.24478	1.45078e-19	2.82182e-18	33.483
GOBP_REGULATION_OF_CELL_CELL_ADHESION_MEDIATED_BY_CADHERIN	0.0573429	-0.515504	9.24235	1.48147e-19	2.8742e-18	33.4624
GOBP_POSITIVE_REGULATION_OF_HEPATOCYTE_PROLIFERATION	0.126967	-0.477239	9.23999	1.51182e-19	2.92567e-18	33.4424
GOBP_LYMPHOCYTE_CHEMOTAXIS	0.0504744	-0.238384	9.23439	1.58623e-19	3.06191e-18	33.3951
GOBP_NEPHRIC_DUCT_MORPHOGENESIS	0.108662	-0.00627465	9.22617	1.70216e-19	3.2774e-18	33.3256
GOBP_REGULATION_OF_T_CELL_PROLIFERATION	0.0296055	-0.4831	9.22136	1.77395e-19	3.40705e-18	33.2849
GOBP_POSITIVE_REGULATION_OF_RNA_BINDING	-0.262668	-0.211768	-9.21988	1.79666e-19	3.44202e-18	33.2724
GOBP_TRIGLYCERIDE_BIOSYNTHETIC_PROCESS	0.078358	-0.146026	9.21783	1.82839e-19	3.49405e-18	33.2551
GOBP_REGULATION_OF_VIRAL_INDUCED_CYTOPLASMIC_PATTERN_RECOGNITION_RECEPTOR_SIGNALING_PATHWAY	0.112544	-0.410082	9.1986	2.15593e-19	4.1097e-18	33.0928
GOBP_CD4_POSITIVE_ALPHA_BETA_T_CELL_DIFFERENTIATION	0.0475697	-0.300419	9.18975	2.32544e-19	4.42181e-18	33.0182
GOBP_GLYCOSPHINGOLIPID_METABOLIC_PROCESS	0.0517346	-0.310497	9.18446	2.43301e-19	4.61487e-18	32.9737
GOBP_TUBE_FORMATION	0.0536354	-0.245879	9.17998	2.5281e-19	4.78337e-18	32.9359
GOBP_PROTEIN_TARGETING_TO_LYSOSOME	0.148475	-0.380886	9.17859	2.5583e-19	4.82856e-18	32.9242
GOBP_FATTY_ACID_DERIVATIVE_METABOLIC_PROCESS	0.0644792	-0.124145	9.17638	2.60715e-19	4.90863e-18	32.9056
GOBP_TISSUE_MORPHOGENESIS	0.0283224	-0.14633	9.1727	2.69025e-19	5.05264e-18	32.8746
GOBP_POSITIVE_REGULATION_OF_IMMUNE_EFFECTOR_PROCESS	0.0307353	-0.404934	9.1667	2.83167e-19	5.30522e-18	32.8242
GOBP_REGULATION_OF_APOPTOTIC_CELL_CLEARANCE	0.0812025	-0.60237	9.15587	3.10568e-19	5.79089e-18	32.7332
GOBP_POSITIVE_REGULATION_OF_VASCULAR_ENDOTHELIAL_GROWTH_FACTOR_PRODUCTION	0.10904	0.0201	9.15583	3.10673e-19	5.79089e-18	32.7329
GOBP_NEGATIVE_REGULATION_OF_VASCULAR_ASSOCIATED_SMOOTH_MUSCLE_CELL_PROLIFERATION	0.120383	-0.187227	9.15557	3.11363e-19	5.79089e-18	32.7307
GOBP_REGULATION_OF_ANATOMICAL_STRUCTURE_SIZE	0.0345246	-0.228665	9.15163	3.22019e-19	5.97454e-18	32.6975
GOBP_RRNA_METABOLIC_PROCESS	-0.0544382	-0.417643	-9.14075	3.53302e-19	6.53908e-18	32.6062
GOBP_PROTEIN_DEPOLYMERIZATION	0.068796	-0.21817	9.1272	3.96481e-19	7.32053e-18	32.4926
GOBP_WALKING_BEHAVIOR	0.124445	-0.295911	9.12114	4.17436e-19	7.68887e-18	32.4419
GOBP_REGULATION_OF_ADAPTIVE_IMMUNE_RESPONSE	0.0275927	-0.436519	9.11493	4.4004e-19	8.08573e-18	32.3899
GOBP_REGULATION_OF_HEPATOCYTE_PROLIFERATION	0.113968	-0.430657	9.11406	4.43335e-19	8.12674e-18	32.3826
GOBP_VESTIBULOCOCHLEAR_NERVE_DEVELOPMENT	0.201251	-0.283645	9.10574	4.7578e-19	8.67986e-18	32.313
GOBP_VESTIBULOCOCHLEAR_NERVE_MORPHOGENESIS	0.201251	-0.283645	9.10574	4.7578e-19	8.67986e-18	32.313
GOBP_REGULATION_OF_ADHERENS_JUNCTION_ORGANIZATION	0.354955	-0.412461	9.09657	5.14285e-19	9.34496e-18	32.2364
GOBP_EMBRYONIC_CAMERA_TYPE_EYE_FORMATION	0.117496	0.232275	9.09648	5.14682e-19	9.34496e-18	32.2356
GOBP_T_CELL_PROLIFERATION	0.029116	-0.443453	9.08994	5.44002e-19	9.85391e-18	32.181
GOBP_INTERMEDIATE_FILAMENT_ORGANIZATION	0.0981361	0.0946565	9.08727	5.56481e-19	1.00561e-17	32.1587
GOBP_FOREBRAIN_CELL_MIGRATION	0.0784989	-0.263325	9.08392	5.72505e-19	1.03146e-17	32.1307
GOBP_OPTIC_CUP_MORPHOGENESIS_INVOLVED_IN_CAMERA_TYPE_EYE_DEVELOPMENT	0.118051	0.234162	9.08371	5.7348e-19	1.03146e-17	32.1291
GOBP_RESPONSE_TO_MINERALOCORTICOID	-0.169334	-0.208922	-9.08335	5.75259e-19	1.03223e-17	32.126
GOBP_DEVELOPMENTAL_GROWTH	0.0341519	-0.174071	9.06795	6.55363e-19	1.17321e-17	31.9976
GOBP_POSITIVE_REGULATION_OF_I_KAPPAB_KINASE_NF_KAPPAB_SIGNALING	0.0482552	-0.286338	9.06728	6.59098e-19	1.17644e-17	31.992
GOBP_DEVELOPMENTAL_MATURATION	0.0356535	-0.109629	9.06707	6.60249e-19	1.17644e-17	31.9903
GOBP_REGULATION_OF_B_CELL_MEDIATED_IMMUNITY	0.061113	-0.334673	9.06174	6.90713e-19	1.22786e-17	31.9459
GOBP_ANTIGEN_PROCESSING_AND_PRESENTATION_OF_EXOGENOUS_ANTIGEN	0.028772	-0.774049	9.05301	7.4362e-19	1.31885e-17	31.8732
GOBP_TELENCEPHALON_REGIONALIZATION	0.276218	-0.364995	9.0525	7.46788e-19	1.3214e-17	31.869
GOBP_REGULATION_OF_ENDOPLASMIC_RETICULUM_STRESS_INDUCED_INTRINSIC_APOPTOTIC_SIGNALING_PATHWAY	0.11797	-0.536622	9.04783	7.76856e-19	1.37143e-17	31.8301
GOBP_MONOCARBOXYLIC_ACID_BIOSYNTHETIC_PROCESS	0.043619	-0.241926	9.02728	9.2388e-19	1.62722e-17	31.6594
GOBP_REGULATION_OF_PROTEIN_EXIT_FROM_ENDOPLASMIC_RETICULUM	0.123594	-0.446503	9.02001	9.82301e-19	1.72614e-17	31.5991
GOBP_REGULATION_OF_NITRIC_OXIDE_MEDIATED_SIGNAL_TRANSDUCTION	0.165684	0.0904813	9.01913	9.89605e-19	1.73499e-17	31.5918
GOBP_TRANSMEMBRANE_TRANSPORT	0.0219149	-0.167321	9.01879	9.92409e-19	1.73592e-17	31.589
GOBP_IRON_IMPORT_INTO_CELL	0.200995	-0.177467	9.01246	1.04672e-18	1.82674e-17	31.5365
GOBP_APICAL_JUNCTION_ASSEMBLY	0.0643721	-0.283251	9.00956	1.07263e-18	1.86769e-17	31.5124
GOBP_NEPHRIC_DUCT_DEVELOPMENT	0.0953379	0.0148717	9.00564	1.10856e-18	1.92587e-17	31.48
GOBP_RETINA_MORPHOGENESIS_IN_CAMERA_TYPE_EYE	0.0499765	-0.285196	8.99411	1.22145e-18	2.11719e-17	31.3845
GOBP_SPROUTING_ANGIOGENESIS	0.0573264	-0.107494	8.99282	1.23475e-18	2.1354e-17	31.3738
GOBP_NEGATIVE_REGULATION_OF_RELAXATION_OF_MUSCLE	0.280908	-0.521429	8.98862	1.27904e-18	2.2032e-17	31.3391
GOBP_POSITIVE_REGULATION_OF_METALLOPEPTIDASE_ACTIVITY	0.232053	-0.509393	8.98856	1.27972e-18	2.2032e-17	31.3386
GOBP_RIBOSOMAL_SMALL_SUBUNIT_ASSEMBLY	-0.128496	-0.550523	-8.9872	1.29444e-18	2.22353e-17	31.3273
GOBP_REGULATION_OF_GLUCOSE_TRANSMEMBRANE_TRANSPORT	0.066596	-0.258209	8.98531	1.31507e-18	2.2539e-17	31.3118
GOBP_NEGATIVE_REGULATION_OF_ENDOPLASMIC_RETICULUM_STRESS_INDUCED_INTRINSIC_APOPTOTIC_SIGNALING_PATHWAY	0.125728	-0.581396	8.97275	1.46132e-18	2.49896e-17	31.2079
GOBP_POSITIVE_REGULATION_OF_SIGNAL_TRANSDUCTION_BY_P53_CLASS_MEDIATOR	-0.10678	-0.43738	-8.97114	1.48121e-18	2.52299e-17	31.1946
GOBP_RESPONSE_TO_INTERLEUKIN_3	-0.30257	-0.0257394	-8.97108	1.48197e-18	2.52299e-17	31.1941
GOBP_REGULATION_OF_SECRETION	0.0270832	-0.170446	8.95274	1.72805e-18	2.93021e-17	31.0429
GOBP_SARCOMERE_ORGANIZATION	0.110298	-0.0894322	8.95269	1.72884e-18	2.93021e-17	31.0424
GOBP_REGULATION_OF_IMMUNE_EFFECTOR_PROCESS	0.0286855	-0.359422	8.9426	1.88108e-18	3.18119e-17	30.9593
GOBP_ACTOMYOSIN_STRUCTURE_ORGANIZATION	0.0478123	-0.21415	8.93512	2.00239e-18	3.37887e-17	30.8978
GOBP_CELLULAR_RESPONSE_TO_GONADOTROPIN_STIMULUS	0.124428	-0.0638115	8.9302	2.0865e-18	3.51305e-17	30.8573
GOBP_REGULATION_OF_HYDROLASE_ACTIVITY	0.0301837	-0.281007	8.92955	2.09787e-18	3.52442e-17	30.8519
GOBP_TUBE_LUMEN_CAVITATION	0.31433	-0.384806	8.92569	2.16659e-18	3.63057e-17	30.8202
GOBP_SULFUR_AMINO_ACID_TRANSPORT	0.317239	-0.1828	8.92547	2.17056e-18	3.63057e-17	30.8184
GOBP_ESTABLISHMENT_OF_PLANAR_POLARITY_OF_EMBRYONIC_EPITHELIUM	0.128473	-0.15771	8.92249	2.22529e-18	3.714e-17	30.7939
GOBP_CELL_MATRIX_ADHESION	0.0353745	-0.247914	8.91689	2.33175e-18	3.88321e-17	30.7479
GOBP_CAMP_CATABOLIC_PROCESS	0.11459	-0.0608285	8.91143	2.44042e-18	4.05534e-17	30.703
GOBP_POSITIVE_REGULATION_OF_VASCULATURE_DEVELOPMENT	0.0622186	-0.186184	8.89773	2.73565e-18	4.53608e-17	30.5906
GOBP_DETERMINATION_OF_ADULT_LIFESPAN	0.120803	-0.319685	8.89495	2.79966e-18	4.63217e-17	30.5678
GOBP_NEPHRON_EPITHELIUM_DEVELOPMENT	0.0553215	-0.104052	8.89223	2.86384e-18	4.72813e-17	30.5455
GOBP_PROTEIN_POLY_ADP_RIBOSYLATION	0.144598	-0.332036	8.89162	2.87821e-18	4.7416e-17	30.5406
GOBP_REGULATION_OF_TRANSPORT	0.0238391	-0.229229	8.88948	2.92997e-18	4.81649e-17	30.523
GOBP_NEGATIVE_REGULATION_OF_LEUKOCYTE_DEGRANULATION	0.0772921	-0.639995	8.87714	3.24686e-18	5.32596e-17	30.422
GOBP_OSTEOCLAST_FUSION	0.237639	-0.427514	8.87354	3.34534e-18	5.47575e-17	30.3925
GOBP_POSITIVE_REGULATION_OF_PROTEIN_CATABOLIC_PROCESS_IN_THE_VACUOLE	0.201184	-0.354765	8.86912	3.47055e-18	5.66856e-17	30.3564
GOBP_METANEPHROS_MORPHOGENESIS	0.089282	-0.138421	8.86	3.7434e-18	6.10118e-17	30.2819
GOBP_REGULATION_OF_CELL_PROJECTION_ORGANIZATION	0.0273856	-0.160226	8.8596	3.75596e-18	6.10863e-17	30.2786
GOBP_REGULATION_OF_RESPONSE_TO_WOUNDING	0.056536	-0.109808	8.83227	4.71111e-18	7.6458e-17	30.0555
GOBP_NEPHRON_MORPHOGENESIS	0.0659187	-0.0813546	8.82356	5.06292e-18	8.19936e-17	29.9847
GOBP_BARBED_END_ACTIN_FILAMENT_CAPPING	0.135561	-0.423117	8.82067	5.18532e-18	8.37982e-17	29.9612
GOBP_POSITIVE_REGULATION_OF_HISTONE_DEACETYLATION	0.123268	-0.365555	8.80841	5.73862e-18	9.25444e-17	29.8614
GOBP_SMALL_GTPASE_MEDIATED_SIGNAL_TRANSDUCTION	0.028153	-0.218486	8.80613	5.84754e-18	9.41022e-17	29.8429
GOBP_CELL_CELL_JUNCTION_ASSEMBLY	0.0533755	-0.231491	8.80484	5.91014e-18	9.49099e-17	29.8324
GOBP_NEPHRON_DEVELOPMENT	0.0511128	-0.133758	8.80446	5.92887e-18	9.50111e-17	29.8293
GOBP_VASCULATURE_DEVELOPMENT	0.0399301	-0.165736	8.80313	5.9943e-18	9.58587e-17	29.8185
GOBP_POSITIVE_REGULATION_OF_MUSCLE_TISSUE_DEVELOPMENT	0.0623254	-0.528096	8.79938	6.18257e-18	9.8663e-17	29.788
GOBP_TRNA_TRANSPORT	-0.352876	-0.171118	-8.79778	6.26494e-18	9.97691e-17	29.775
GOBP_REGULATION_OF_TRIGLYCERIDE_METABOLIC_PROCESS	0.0702131	-0.356992	8.79589	6.3634e-18	1.01126e-16	29.7597
GOBP_NEGATIVE_REGULATION_OF_COAGULATION	0.0913348	0.0293808	8.79309	6.5119e-18	1.03272e-16	29.7369
GOBP_ESTABLISHMENT_OF_ENDOTHELIAL_BARRIER	0.0751656	-0.285717	8.79168	6.58823e-18	1.04266e-16	29.7255
GOBP_ENTRY_INTO_HOST	0.0521105	-0.362515	8.78859	6.75822e-18	1.06735e-16	29.7004
GOBP_SEQUESTERING_OF_METAL_ION	-0.177572	-0.361288	-8.78588	6.91098e-18	1.08923e-16	29.6784
GOBP_POSITIVE_REGULATION_BY_SYMBIONT_OF_ENTRY_INTO_HOST	0.144733	-0.616807	8.77874	7.32934e-18	1.15279e-16	29.6206
GOBP_REGULATION_OF_DEOXYRIBONUCLEASE_ACTIVITY	-0.210559	-0.444058	-8.77307	7.67994e-18	1.20545e-16	29.5746
GOBP_ENDOCRINE_PROCESS	0.0624075	-0.108379	8.76848	7.97579e-18	1.24932e-16	29.5374
GOBP_FATTY_ACID_BIOSYNTHETIC_PROCESS	0.0452555	-0.273179	8.75505	8.90649e-18	1.39225e-16	29.4288
GOBP_DIGESTIVE_SYSTEM_PROCESS	0.0506929	-0.182599	8.7523	9.1102e-18	1.42119e-16	29.4065
GOBP_REGULATION_OF_SODIUM_ION_TRANSPORT	0.0551335	-0.170115	8.74553	9.63089e-18	1.49936e-16	29.3518
GOBP_REGULATION_OF_TRIGLYCERIDE_BIOSYNTHETIC_PROCESS	0.101205	-0.199393	8.73832	1.02182e-17	1.58756e-16	29.2936
GOBP_CELL_SUBSTRATE_ADHESION	0.0327889	-0.221611	8.73795	1.02498e-17	1.58924e-16	29.2905
GOBP_L_AMINO_ACID_TRANSPORT	0.075242	-0.17916	8.72216	1.16665e-17	1.80523e-16	29.1631
GOBP_INTERLEUKIN_4_MEDIATED_SIGNALING_PATHWAY	0.159553	-0.311683	8.72076	1.18006e-17	1.82229e-16	29.1519
GOBP_PYRIMIDINE_NUCLEOBASE_TRANSPORT	0.179961	0.069126	8.71861	1.201e-17	1.8509e-16	29.1346
GOBP_CYTOPLASMIC_MICROTUBULE_ORGANIZATION	0.0820347	-0.290435	8.69454	1.46236e-17	2.24915e-16	28.9409
GOBP_MULTINUCLEAR_OSTEOCLAST_DIFFERENTIATION	0.200841	-0.338201	8.69234	1.48896e-17	2.28546e-16	28.9231
GOBP_ICOSANOID_CATABOLIC_PROCESS	0.0453809	-0.210329	8.68908	1.52916e-17	2.34246e-16	28.8969
GOBP_ADULT_LOCOMOTORY_BEHAVIOR	0.0682207	-0.184683	8.68611	1.56664e-17	2.39508e-16	28.8731
GOBP_POSITIVE_REGULATION_OF_CELL_CELL_ADHESION	0.0231644	-0.513826	8.68086	1.63529e-17	2.49504e-16	28.8309
GOBP_INNATE_IMMUNE_RESPONSE	0.024271	-0.363903	8.67931	1.6561e-17	2.52176e-16	28.8184
GOBP_T_CELL_MEDIATED_IMMUNITY	0.0262597	-0.557256	8.6712	1.76934e-17	2.68883e-16	28.7534
GOBP_PROTEIN_LOCALIZATION_TO_GOLGI_APPARATUS	0.129676	-0.367765	8.66776	1.81966e-17	2.75982e-16	28.7258
GOBP_REGULATION_OF_COMPLEMENT_ACTIVATION_ALTERNATIVE_PATHWAY	0.162531	0.0831474	8.66014	1.93619e-17	2.93074e-16	28.6647
GOBP_REGULATION_OF_CELL_SHAPE	0.0452039	-0.236526	8.65842	1.9635e-17	2.9662e-16	28.6509
GOBP_PEPTIDE_ANTIGEN_ASSEMBLY_WITH_MHC_PROTEIN_COMPLEX	0.0338233	-0.849688	8.64911	2.11803e-17	3.19334e-16	28.5764
GOBP_CELLULAR_RESPONSE_TO_THYROID_HORMONE_STIMULUS	0.138088	-0.361418	8.64457	2.19773e-17	3.30698e-16	28.5401
GOBP_PROTEIN_LOCALIZATION_TO_PLASMA_MEMBRANE	0.0485908	-0.262828	8.64429	2.20263e-17	3.30784e-16	28.5379
GOBP_POSITIVE_REGULATION_OF_ALPHA_BETA_T_CELL_DIFFERENTIATION	0.0516047	-0.412931	8.64288	2.22803e-17	3.33943e-16	28.5266
GOBP_ELASTIN_CATABOLIC_PROCESS	0.448617	-0.415719	8.63368	2.40099e-17	3.59163e-16	28.453
GOBP_INFLAMMATORY_RESPONSE_TO_ANTIGENIC_STIMULUS	0.073099	-0.40639	8.62989	2.4762e-17	3.69689e-16	28.4227
GOBP_POSITIVE_REGULATION_OF_MONOCYTE_DIFFERENTIATION	0.126382	-0.596161	8.62273	2.62436e-17	3.91046e-16	28.3655
GOBP_SPHINGOLIPID_METABOLIC_PROCESS	0.0509226	-0.25776	8.61349	2.82869e-17	4.20672e-16	28.2918
GOBP_EPITHELIAL_TUBE_MORPHOGENESIS	0.0300297	-0.237782	8.60933	2.92558e-17	4.34235e-16	28.2586
GOBP_POSITIVE_REGULATION_OF_B_CELL_MEDIATED_IMMUNITY	0.0638959	-0.373462	8.60907	2.93185e-17	4.34322e-16	28.2565
GOBP_PYRIMIDINE_NUCLEOSIDE_TRANSPORT	0.172956	-0.0142631	8.60819	2.95277e-17	4.36575e-16	28.2495
GOBP_ACTIN_FILAMENT_ORGANIZATION	0.0362325	-0.267868	8.60003	3.1546e-17	4.65517e-16	28.1845
GOBP_POSITIVE_REGULATION_OF_SIGNALING	0.0208383	-0.242801	8.59186	3.3702e-17	4.96374e-16	28.1195
GOBP_ORGANIC_ACID_TRANSMEMBRANE_TRANSPORT	0.05459	-0.163745	8.58042	3.69672e-17	5.43419e-16	28.0285
GOBP_ACETATE_ESTER_TRANSPORT	-0.0400106	-0.484431	-8.57705	3.79896e-17	5.57375e-16	28.0017
GOBP_REGULATION_OF_INFLAMMATORY_RESPONSE	0.0362626	-0.286687	8.56318	4.24911e-17	6.22226e-16	27.8915
GOBP_MAINTENANCE_OF_PROTEIN_LOCATION_IN_EXTRACELLULAR_REGION	0.0874495	0.286576	8.56265	4.26718e-17	6.23677e-16	27.8874
GOBP_NEGATIVE_REGULATION_OF_MAST_CELL_DEGRANULATION	0.306128	-0.327512	8.56098	4.32521e-17	6.30953e-16	27.8741
GOBP_MICROTUBULE_NUCLEATION	0.0646575	-0.432505	8.5592	4.38745e-17	6.3773e-16	27.86
GOBP_COMPLEMENT_DEPENDENT_CYTOTOXICITY	0.159427	-0.317249	8.55918	4.38836e-17	6.3773e-16	27.8598
GOBP_MORPHOGENESIS_OF_AN_EPITHELIUM	0.028657	-0.174048	8.55262	4.62681e-17	6.71107e-16	27.8078
GOBP_ENDOCARDIAL_CUSHION_TO_MESENCHYMAL_TRANSITION	0.264358	-0.0757753	8.5515	4.66863e-17	6.75891e-16	27.7989
GOBP_CYTOPLASMIC_PATTERN_RECOGNITION_RECEPTOR_SIGNALING_PATHWAY	0.055479	-0.415207	8.54803	4.80092e-17	6.93728e-16	27.7715
GOBP_REGULATION_OF_RECEPTOR_CLUSTERING	0.169958	-0.212262	8.54237	5.02495e-17	7.23737e-16	27.7266
GOBP_REGULATION_OF_T_HELPER_CELL_DIFFERENTIATION	0.0476221	-0.467636	8.5423	5.02753e-17	7.23737e-16	27.7261
GOBP_CELL_PROJECTION_ASSEMBLY	0.0297245	-0.221572	8.54038	5.10586e-17	7.33632e-16	27.7109
GOBP_MEMBRANE_DISRUPTION_IN_ANOTHER_ORGANISM	0.184669	-0.623864	8.53931	5.15001e-17	7.38587e-16	27.7024
GOBP_REGULATION_OF_BICELLULAR_TIGHT_JUNCTION_ASSEMBLY	0.0695517	-0.351306	8.53647	5.26925e-17	7.54272e-16	27.6799
GOBP_REGULATION_OF_ASPARTIC_TYPE_PEPTIDASE_ACTIVITY	0.122167	-0.49094	8.52926	5.584e-17	7.97834e-16	27.6229
GOBP_NEUTRAL_LIPID_BIOSYNTHETIC_PROCESS	0.0703232	-0.126699	8.51963	6.03339e-17	8.60434e-16	27.5467
GOBP_ALPHA_BETA_T_CELL_ACTIVATION	0.0335732	-0.351134	8.50278	6.90708e-17	9.83198e-16	27.4137
GOBP_POSITIVE_REGULATION_OF_DEACETYLASE_ACTIVITY	0.192512	-0.394383	8.49976	7.0763e-17	1.00541e-15	27.3899
GOBP_GOLGI_TO_ENDOSOME_TRANSPORT	0.106206	-0.404206	8.49828	7.16112e-17	1.01558e-15	27.3782
GOBP_ORGANIC_ACID_BIOSYNTHETIC_PROCESS	0.041691	-0.247125	8.48799	7.77646e-17	1.1008e-15	27.2972
GOBP_SYNAPTIC_VESICLE_ENDOSOMAL_PROCESSING	0.115737	-0.402578	8.48749	7.8073e-17	1.10312e-15	27.2933
GOBP_REFLEX	0.135132	-0.0267171	8.48348	8.06204e-17	1.13701e-15	27.2617
GOBP_POSITIVE_REGULATION_OF_PEPTIDYL_TYROSINE_PHOSPHORYLATION	0.0367826	-0.143234	8.47958	8.31784e-17	1.17093e-15	27.231
GOBP_NEGATIVE_REGULATION_OF_ENDOTHELIAL_CELL_DIFFERENTIATION	0.11881	-0.243575	8.47348	8.73409e-17	1.22727e-15	27.183
GOBP_POSITIVE_REGULATION_OF_COAGULATION	0.0921226	-0.147979	8.47199	8.83879e-17	1.2397e-15	27.1713
GOBP_WATER_TRANSPORT	0.0815001	0.22535	8.46981	8.99427e-17	1.2592e-15	27.1541
GOBP_ESTABLISHMENT_OF_CENTROSOME_LOCALIZATION	0.192676	-0.264699	8.46888	9.06134e-17	1.26627e-15	27.1468
GOBP_LYSOSOMAL_TRANSPORT	0.0694253	-0.40711	8.46757	9.15658e-17	1.27724e-15	27.1365
GOBP_OLIGODENDROCYTE_DEVELOPMENT	0.073966	-0.0482126	8.46651	9.23448e-17	1.28576e-15	27.1282
GOBP_CARBOHYDRATE_HOMEOSTASIS	0.0438639	-0.256798	8.46319	9.48309e-17	1.31798e-15	27.1021
GOBP_REGULATION_OF_MULTICELLULAR_ORGANISMAL_DEVELOPMENT	0.0252036	-0.198866	8.46207	9.56764e-17	1.32732e-15	27.0933
GOBP_IMMUNOGLOBULIN_PRODUCTION_INVOLVED_IN_IMMUNOGLOBULIN_MEDIATED_IMMUNE_RESPONSE	0.0250311	-0.640749	8.46116	9.63749e-17	1.33458e-15	27.0862
GOBP_RESPONSE_TO_ELECTRICAL_STIMULUS	0.0561608	-0.33466	8.45785	9.89563e-17	1.36785e-15	27.0602
GOBP_REGULATION_OF_NEURON_MIGRATION	0.0750002	0.0871932	8.45191	1.03764e-16	1.43172e-15	27.0136
GOBP_NEGATIVE_REGULATION_OF_CYCLIC_NUCLEOTIDE_PHOSPHODIESTERASE_ACTIVITY	0.228882	-0.456434	8.45136	1.04217e-16	1.43538e-15	27.0093
GOBP_ESTABLISHMENT_OF_PLANAR_POLARITY_INVOLVED_IN_NEURAL_TUBE_CLOSURE	0.132666	-0.0903991	8.45107	1.04463e-16	1.43618e-15	27.007
GOBP_REGULATION_OF_CELLULAR_MACROMOLECULE_BIOSYNTHETIC_PROCESS	-0.0376542	-0.312672	-8.45027	1.05132e-16	1.44278e-15	27.0007
GOBP_REGULATION_OF_CELL_MORPHOGENESIS	0.0381135	-0.223517	8.44509	1.09569e-16	1.50098e-15	26.96
GOBP_POSITIVE_REGULATION_OF_AXONOGENESIS	0.051712	-0.218104	8.44433	1.10232e-16	1.50736e-15	26.9541
GOBP_RESPONSE_TO_CARBOHYDRATE	0.0474607	-0.20848	8.44288	1.1151e-16	1.52212e-15	26.9428
GOBP_REGULATION_OF_SYSTEMIC_ARTERIAL_BLOOD_PRESSURE_BY_HORMONE	0.116603	-0.154881	8.43429	1.19412e-16	1.62706e-15	26.8755
GOBP_CILIUM_ORGANIZATION	0.0345511	-0.21366	8.43167	1.21936e-16	1.6585e-15	26.8549
GOBP_INTERFERON_GAMMA_PRODUCTION	0.0249494	-0.445141	8.42997	1.23592e-16	1.67805e-15	26.8416
GOBP_SALIVARY_GLAND_DEVELOPMENT	0.0779289	-0.267774	8.42787	1.25684e-16	1.70342e-15	26.8251
GOBP_POSITIVE_REGULATION_OF_POTASSIUM_ION_TRANSPORT	0.0899726	-0.126428	8.4267	1.26861e-16	1.71633e-15	26.816
GOBP_POSITIVE_REGULATION_OF_NUCLEOTIDE_BINDING_OLIGOMERIZATION_DOMAIN_CONTAINING_2_SIGNALING_PATHWAY	0.0527575	-0.715092	8.42038	1.33402e-16	1.79783e-15	26.7665
GOBP_POSITIVE_REGULATION_OF_NUCLEOTIDE_BINDING_OLIGOMERIZATION_DOMAIN_CONTAINING_SIGNALING_PATHWAY	0.0527575	-0.715092	8.42038	1.33402e-16	1.79783e-15	26.7665
GOBP_WATER_HOMEOSTASIS	0.067409	-0.0759145	8.4202	1.33591e-16	1.79783e-15	26.7651
GOBP_REGULATION_OF_LIPID_METABOLIC_PROCESS	0.0404488	-0.211084	8.41751	1.36481e-16	1.8335e-15	26.7441
GOBP_KIDNEY_MORPHOGENESIS	0.0614586	-0.0657635	8.40484	1.50946e-16	2.02427e-15	26.6451
GOBP_REGULATION_OF_MICROTUBULE_NUCLEATION	0.0602788	-0.626001	8.39957	1.57389e-16	2.10697e-15	26.604
GOBP_POSITIVE_REGULATION_OF_CD4_POSITIVE_ALPHA_BETA_T_CELL_ACTIVATION	0.0499505	-0.459134	8.39521	1.6293e-16	2.17733e-15	26.57
GOBP_SIALIC_ACID_TRANSPORT	0.23144	-0.225463	8.38602	1.75257e-16	2.33799e-15	26.4983
GOBP_RESPONSE_TO_NUTRIENT	0.0494566	-0.087651	8.37657	1.8888e-16	2.51533e-15	26.4247
GOBP_CD4_POSITIVE_ALPHA_BETA_T_CELL_ACTIVATION	0.0394523	-0.303971	8.3763	1.89279e-16	2.51626e-15	26.4226
GOBP_UREA_TRANSMEMBRANE_TRANSPORT	0.206682	0.0860446	8.37536	1.90694e-16	2.53067e-15	26.4153
GOBP_ACTIN_FILAMENT_BUNDLE_ORGANIZATION	0.0492972	-0.241646	8.37296	1.94364e-16	2.5749e-15	26.3966
GOBP_NOTOCHORD_MORPHOGENESIS	0.164939	0.0423377	8.36798	2.02172e-16	2.67371e-15	26.3578
GOBP_POSITIVE_REGULATION_OF_MICROTUBULE_NUCLEATION	0.0641505	-0.689233	8.36731	2.0325e-16	2.68333e-15	26.3526
GOBP_REGULATION_OF_DEFENSE_RESPONSE	0.027709	-0.305365	8.33146	2.69781e-16	3.55553e-15	26.0743
GOBP_POTASSIUM_ION_IMPORT_ACROSS_PLASMA_MEMBRANE	0.0679022	0.137281	8.32321	2.87919e-16	3.78805e-15	26.0103
GOBP_REGULATION_OF_RIG_I_SIGNALING_PATHWAY	0.111291	-0.402457	8.3139	3.09822e-16	4.06921e-15	25.9383
GOBP_GLUTAMINE_TRANSPORT	0.173359	-0.209475	8.30917	3.21554e-16	4.21605e-15	25.9017
GOBP_AMINO_ACID_TRANSPORT	0.0432347	-0.116304	8.30729	3.26341e-16	4.27051e-15	25.8872
GOBP_POSITIVE_REGULATION_OF_ACUTE_INFLAMMATORY_RESPONSE_TO_ANTIGENIC_STIMULUS	0.158092	-0.563808	8.30711	3.26824e-16	4.27051e-15	25.8858
GOBP_MICROTUBULE_ORGANIZING_CENTER_LOCALIZATION	0.10216	-0.242514	8.29932	3.47467e-16	4.53249e-15	25.8256
GOBP_L_CYSTINE_TRANSPORT	0.372478	-0.222037	8.29707	3.53661e-16	4.60543e-15	25.8082
GOBP_NEGATIVE_REGULATION_OF_DEFENSE_RESPONSE	0.0322902	-0.399056	8.29635	3.55656e-16	4.62353e-15	25.8027
GOBP_NEGATIVE_REGULATION_OF_MULTICELLULAR_ORGANISMAL_PROCESS	0.0211282	-0.196888	8.29326	3.6441e-16	4.72928e-15	25.7788
GOBP_AMIDE_TRANSPORT	0.0291878	-0.233796	8.28139	3.99993e-16	5.18229e-15	25.6872
GOBP_POSITIVE_REGULATION_OF_BICELLULAR_TIGHT_JUNCTION_ASSEMBLY	0.15012	-0.131916	8.27175	4.31375e-16	5.57941e-15	25.613
GOBP_PROTEIN_LOCALIZATION_TO_EXTRACELLULAR_REGION	0.0287969	-0.138437	8.26751	4.45978e-16	5.75854e-15	25.5803
GOBP_POSITIVE_REGULATION_OF_LOCOMOTION	0.0322927	-0.219535	8.2671	4.47383e-16	5.76695e-15	25.5772
GOBP_MONOCYTE_ACTIVATION	0.112618	-0.311834	8.2649	4.55183e-16	5.85761e-15	25.5602
GOBP_RESPONSE_TO_GONADOTROPIN	0.0933454	-0.162003	8.26334	4.60773e-16	5.91958e-15	25.5482
GOBP_PHAGOCYTOSIS_RECOGNITION	-0.0300317	-0.350215	-8.26013	4.72499e-16	6.05158e-15	25.5235
GOBP_POST_EMBRYONIC_DEVELOPMENT	0.0793841	-0.179319	8.26009	4.72631e-16	6.05158e-15	25.5232
GOBP_REGULATION_OF_DEACETYLASE_ACTIVITY	0.154876	-0.398566	8.25186	5.04092e-16	6.44361e-15	25.4599
GOBP_POSITIVE_REGULATION_OF_INTRINSIC_APOPTOTIC_SIGNALING_PATHWAY	-0.0835647	-0.362038	-8.24513	5.31329e-16	6.78044e-15	25.4082
GOBP_CELLULAR_MODIFIED_AMINO_ACID_METABOLIC_PROCESS	0.0550279	-0.233793	8.24306	5.39999e-16	6.87959e-15	25.3923
GOBP_HEART_DEVELOPMENT	0.032311	-0.113934	8.24129	5.47488e-16	6.96339e-15	25.3788
GOBP_NEURON_PROJECTION_EXTENSION_INVOLVED_IN_NEURON_PROJECTION_GUIDANCE	0.046063	0.0234007	8.23881	5.58234e-16	7.08828e-15	25.3597
GOBP_CRANIAL_NERVE_STRUCTURAL_ORGANIZATION	0.125144	-0.247476	8.23439	5.778e-16	7.32454e-15	25.3258
GOBP_I_KAPPAB_KINASE_NF_KAPPAB_SIGNALING	0.0354911	-0.288376	8.2264	6.14983e-16	7.783e-15	25.2646
GOBP_CYSTEINE_METABOLIC_PROCESS	0.153131	-0.303325	8.2161	6.66429e-16	8.42013e-15	25.1856
GOBP_EXPORT_FROM_CELL	0.0215068	-0.186213	8.21355	6.79805e-16	8.57496e-15	25.1661
GOBP_CEREBELLAR_CORTEX_DEVELOPMENT	0.0832329	-0.167543	8.20991	6.99372e-16	8.80725e-15	25.1382
GOBP_METENCEPHALON_DEVELOPMENT	0.0557292	-0.228204	8.18902	8.22769e-16	1.03442e-14	24.9786
GOBP_POSITIVE_REGULATION_OF_T_CELL_PROLIFERATION	0.0286361	-0.536084	8.18572	8.4411e-16	1.0595e-14	24.9534
GOBP_SKELETAL_MUSCLE_TISSUE_REGENERATION	0.11499	-0.0717895	8.17994	8.82913e-16	1.10639e-14	24.9093
GOBP_RESPONSE_TO_WOUNDING	0.0300334	-0.214312	8.17749	8.99877e-16	1.1258e-14	24.8906
GOBP_PRODUCTION_OF_MOLECULAR_MEDIATOR_OF_IMMUNE_RESPONSE	0.0234813	-0.515337	8.17051	9.49951e-16	1.18651e-14	24.8374
GOBP_CARTILAGE_DEVELOPMENT	0.0421196	0.0324559	8.16674	9.78094e-16	1.21967e-14	24.8087
GOBP_INTERMEDIATE_FILAMENT_BASED_PROCESS	0.0702799	0.00470564	8.16648	9.80117e-16	1.2202e-14	24.8067
GOBP_MONOCYTE_DIFFERENTIATION	0.0941606	-0.368226	8.15765	1.04954e-15	1.3045e-14	24.7394
GOBP_PHOSPHATIDYLGLYCEROL_ACYL_CHAIN_REMODELING	0.158505	-0.578798	8.15583	1.06436e-15	1.32078e-14	24.7257
GOBP_HIPPO_SIGNALING	0.0708314	-0.208881	8.14952	1.11769e-15	1.38345e-14	24.6776
GOBP_DIGESTION	0.0406131	-0.0973033	8.14943	1.11848e-15	1.38345e-14	24.677
GOBP_EXTRINSIC_APOPTOTIC_SIGNALING_PATHWAY	0.0442417	-0.33429	8.14574	1.15089e-15	1.42123e-14	24.6489
GOBP_POSITIVE_REGULATION_OF_NEURON_PROJECTION_REGENERATION	0.149216	-0.363861	8.14242	1.18081e-15	1.45582e-14	24.6237
GOBP_COMPLEMENT_ACTIVATION_LECTIN_PATHWAY	0.188589	-0.0376854	8.14141	1.19005e-15	1.46486e-14	24.616
GOBP_CELL_JUNCTION_DISASSEMBLY	0.100894	-0.206647	8.14108	1.19307e-15	1.46621e-14	24.6135
GOBP_REGULATION_OF_PROTEIN_CONTAINING_COMPLEX_DISASSEMBLY	0.0601184	-0.270807	8.13983	1.20465e-15	1.47807e-14	24.6041
GOBP_NEGATIVE_REGULATION_OF_IMMUNE_RESPONSE	0.0345491	-0.433769	8.13078	1.29194e-15	1.58262e-14	24.5353
GOBP_HEART_VALVE_FORMATION	0.110948	0.165194	8.12845	1.31544e-15	1.60884e-14	24.5176
GOBP_REGULATORY_T_CELL_DIFFERENTIATION	0.0351652	-0.583602	8.12783	1.32174e-15	1.61396e-14	24.5129
GOBP_ELASTIN_METABOLIC_PROCESS	0.276468	-0.329557	8.12557	1.34498e-15	1.63972e-14	24.4958
GOBP_VACUOLAR_TRANSPORT	0.0628751	-0.405435	8.12431	1.35812e-15	1.6531e-14	24.4863
GOBP_AMINO_ACID_TRANSMEMBRANE_TRANSPORT	0.055762	-0.126943	8.11826	1.42308e-15	1.72941e-14	24.4404
GOBP_NEGATIVE_REGULATION_OF_LEUKOCYTE_PROLIFERATION	0.0330793	-0.415198	8.11775	1.42868e-15	1.73346e-14	24.4365
GOBP_REGULATION_OF_BLOOD_VESSEL_REMODELING	0.2161	-0.275253	8.1159	1.44926e-15	1.75565e-14	24.4225
GOBP_REGULATION_OF_ACTIN_FILAMENT_BASED_PROCESS	0.0361011	-0.269388	8.10388	1.58996e-15	1.92304e-14	24.3315
GOBP_POSITIVE_REGULATION_OF_CELLULAR_AMIDE_METABOLIC_PROCESS	-0.0515987	-0.350903	-8.10341	1.59569e-15	1.92693e-14	24.3279
GOBP_REGULATION_OF_MEMBRANE_DEPOLARIZATION_DURING_ACTION_POTENTIAL	0.195602	-0.334217	8.09576	1.6925e-15	2.04061e-14	24.2701
GOBP_MEMBRANE_LIPID_METABOLIC_PROCESS	0.0450544	-0.24491	8.0906	1.76109e-15	2.11997e-14	24.2311
GOBP_HINDBRAIN_DEVELOPMENT	0.0458544	-0.163682	8.09026	1.76558e-15	2.12203e-14	24.2286
GOBP_REGULATION_OF_JNK_CASCADE	0.0443631	-0.259259	8.07793	1.94119e-15	2.32943e-14	24.1355
GOBP_FOREBRAIN_VENTRICULAR_ZONE_PROGENITOR_CELL_DIVISION	0.196503	-0.368688	8.07659	1.96133e-15	2.34973e-14	24.1253
GOBP_PHOSPHATIDYLCHOLINE_CATABOLIC_PROCESS	-0.0920982	0.209122	-8.07639	1.96425e-15	2.34973e-14	24.1239
GOBP_RECEPTOR_MEDIATED_VIRION_ATTACHMENT_TO_HOST_CELL	0.24592	-0.396061	8.07465	1.99068e-15	2.37761e-14	24.1107
GOBP_MEMBRANE_LIPID_BIOSYNTHETIC_PROCESS	0.0502989	-0.220292	8.07435	1.99526e-15	2.37937e-14	24.1085
GOBP_REGULATION_OF_ALPHA_BETA_T_CELL_ACTIVATION	0.0329673	-0.436933	8.06401	2.16007e-15	2.5719e-14	24.0305
GOBP_TRANSITION_METAL_ION_TRANSPORT	0.0558174	-0.301802	8.05017	2.40196e-15	2.85545e-14	23.9263
GOBP_LIPOPROTEIN_LOCALIZATION	0.144027	-0.390001	8.04837	2.43527e-15	2.89055e-14	23.9128
GOBP_REGULATION_OF_SYSTEMIC_ARTERIAL_BLOOD_PRESSURE_BY_CIRCULATORY_RENIN_ANGIOTENSIN	0.164345	-0.231418	8.0417	2.56287e-15	3.03594e-14	23.8626
GOBP_NEGATIVE_REGULATION_OF_COMPLEMENT_ACTIVATION	0.221141	-0.239375	8.04155	2.5657e-15	3.03594e-14	23.8616
GOBP_POSITIVE_REGULATION_OF_LIPID_STORAGE	0.146258	-0.218422	8.04015	2.59346e-15	3.06188e-14	23.851
GOBP_NEGATIVE_REGULATION_OF_DEVELOPMENTAL_PROCESS	0.0264921	-0.177757	8.04004	2.59563e-15	3.06188e-14	23.8502
GOBP_REGULATION_OF_RNA_BINDING	-0.201055	-0.210287	-8.03708	2.65508e-15	3.12719e-14	23.8279
GOBP_REGULATION_OF_DNA_BINDING	-0.0515486	-0.25315	-8.02878	2.82892e-15	3.32681e-14	23.7657
GOBP_REGULATION_OF_CALCIUM_ION_IMPORT	-0.0606585	-0.154827	-8.02476	2.91727e-15	3.42544e-14	23.7355
GOBP_UREA_TRANSPORT	0.124714	0.298695	8.02417	2.93028e-15	3.43544e-14	23.7311
GOBP_ACTIN_CYTOSKELETON_REORGANIZATION	0.0524224	-0.222432	8.0186	3.0577e-15	3.57933e-14	23.6893
GOBP_POSITIVE_REGULATION_OF_CELL_CELL_ADHESION_MEDIATED_BY_CADHERIN	0.0543814	-0.573639	8.00529	3.38454e-15	3.95588e-14	23.5896
GOBP_REGULATION_OF_RESPONSE_TO_EXTERNAL_STIMULUS	0.0228948	-0.284076	7.99905	3.54948e-15	4.14232e-14	23.5429
GOBP_RESPONSE_TO_CORTICOSTERONE	-0.224669	-0.132277	-7.99778	3.58373e-15	4.17592e-14	23.5335
GOBP_NEGATIVE_REGULATION_OF_EXTRINSIC_APOPTOTIC_SIGNALING_PATHWAY_VIA_DEATH_DOMAIN_RECEPTORS	0.10288	-0.269784	7.98861	3.84314e-15	4.47138e-14	23.4649
GOBP_NUCLEOSIDE_TRANSMEMBRANE_TRANSPORT	0.120279	0.103902	7.98532	3.94058e-15	4.57778e-14	23.4403
GOBP_NEGATIVE_REGULATION_OF_RNA_CATABOLIC_PROCESS	-0.0777325	-0.267402	-7.98001	4.10281e-15	4.75901e-14	23.4007
GOBP_ZINC_ION_TRANSPORT	0.077075	-0.427538	7.97522	4.25504e-15	4.92811e-14	23.3649
GOBP_REGULATION_OF_ENDOTHELIAL_CELL_DEVELOPMENT	0.0888961	-0.29161	7.9665	4.54652e-15	5.25773e-14	23.2999
GOBP_SECRETION	0.0203335	-0.187858	7.96189	4.70816e-15	5.43644e-14	23.2656
GOBP_REGULATION_OF_THE_FORCE_OF_HEART_CONTRACTION_BY_CHEMICAL_SIGNAL	-0.261586	0.159977	-7.95853	4.82987e-15	5.56856e-14	23.2405
GOBP_REGULATION_OF_MYELOID_LEUKOCYTE_MEDIATED_IMMUNITY	0.0751965	-0.265882	7.95229	5.06379e-15	5.82946e-14	23.1941
GOBP_POSITIVE_REGULATION_OF_DNA_BIOSYNTHETIC_PROCESS	-0.0597608	-0.255793	-7.95058	5.12979e-15	5.89656e-14	23.1814
GOBP_HISTONE_H3_K9_DEMETHYLATION	0.108904	-0.103421	7.9502	5.14479e-15	5.90492e-14	23.1785
GOBP_NOTOCHORD_DEVELOPMENT	0.0778188	-0.0217156	7.94317	5.42603e-15	6.21838e-14	23.1263
GOBP_GROWTH	0.0267997	-0.21752	7.94225	5.46421e-15	6.25276e-14	23.1194
GOBP_POSITIVE_REGULATION_OF_SMOOTHENED_SIGNALING_PATHWAY	0.0906001	-0.181132	7.93745	5.66653e-15	6.47458e-14	23.0837
GOBP_REGULATION_OF_MEMBRANE_DEPOLARIZATION_DURING_CARDIAC_MUSCLE_CELL_ACTION_POTENTIAL	0.199019	-0.336429	7.93623	5.71882e-15	6.52458e-14	23.0747
GOBP_HEPATICOBILIARY_SYSTEM_DEVELOPMENT	0.0591023	-0.241389	7.92789	6.09156e-15	6.93947e-14	23.0127
GOBP_LIPID_DROPLET_FORMATION	0.156719	-0.177873	7.9215	6.39286e-15	7.27188e-14	22.9653
GOBP_ENDOCYTOSIS	0.0276697	-0.281379	7.91868	6.53034e-15	7.41722e-14	22.9444
GOBP_REGULATION_OF_GTPASE_ACTIVITY	0.0268599	-0.210796	7.91274	6.83015e-15	7.74624e-14	22.9004
GOBP_REGULATION_OF_NON_CANONICAL_WNT_SIGNALING_PATHWAY	0.0909013	0.0232028	7.91015	6.96494e-15	7.8874e-14	22.8812
GOBP_REGULATION_OF_CELL_MATRIX_ADHESION	0.047626	-0.286948	7.90207	7.40233e-15	8.37032e-14	22.8214
GOBP_CARDIAC_MUSCLE_TISSUE_DEVELOPMENT	0.0434292	-0.111589	7.88732	8.27268e-15	9.34067e-14	22.7123
GOBP_POSITIVE_REGULATION_OF_JNK_CASCADE	0.0489926	-0.244164	7.88703	8.29048e-15	9.34697e-14	22.7102
GOBP_SYNAPTIC_VESICLE_RECYCLING_VIA_ENDOSOME	0.127429	-0.461577	7.88343	8.51865e-15	9.59007e-14	22.6836
GOBP_PROTEIN_LOCALIZATION_TO_CELL_PERIPHERY	0.0396217	-0.263234	7.86558	9.74168e-15	1.09508e-13	22.5519
GOBP_REGULATION_OF_FLAGELLATED_SPERM_MOTILITY	0.162726	-0.171516	7.86404	9.85502e-15	1.10619e-13	22.5406
GOBP_GLYCOPROTEIN_CATABOLIC_PROCESS	0.0894292	-0.302581	7.85633	1.04424e-14	1.17041e-13	22.4838
GOBP_GLYCEROPHOSPHOLIPID_CATABOLIC_PROCESS	-0.0650787	-0.138068	-7.85067	1.08951e-14	1.21936e-13	22.4421
GOBP_DENTATE_GYRUS_DEVELOPMENT	0.126529	-0.409212	7.84863	1.10632e-14	1.23636e-13	22.4271
GOBP_POSITIVE_REGULATION_OF_PROTEIN_LOCALIZATION_TO_MEMBRANE	0.0559813	-0.265567	7.8234	1.33636e-14	1.49126e-13	22.2418
GOBP_REGULATION_OF_STRESS_ACTIVATED_PROTEIN_KINASE_SIGNALING_CASCADE	0.0429594	-0.258642	7.82311	1.33926e-14	1.49232e-13	22.2396
GOBP_QUINONE_CATABOLIC_PROCESS	0.117584	0.284532	7.82069	1.36364e-14	1.51728e-13	22.2219
GOBP_CARBOHYDRATE_DERIVATIVE_CATABOLIC_PROCESS	0.0414451	-0.306442	7.81892	1.38181e-14	1.53525e-13	22.2089
GOBP_ANION_TRANSMEMBRANE_TRANSPORT	0.0383014	-0.172141	7.81769	1.39457e-14	1.54718e-13	22.1999
GOBP_POSITIVE_REGULATION_OF_INTERFERON_GAMMA_PRODUCTION	0.0241185	-0.499379	7.80374	1.54766e-14	1.71453e-13	22.0977
GOBP_CELL_GROWTH	0.0293045	-0.248779	7.78727	1.74981e-14	1.93567e-13	21.9773
GOBP_NUCLEOTIDE_BINDING_DOMAIN_LEUCINE_RICH_REPEAT_CONTAINING_RECEPTOR_SIGNALING_PATHWAY	0.0663489	-0.42398	7.76689	2.03618e-14	2.24922e-13	21.8286
GOBP_TIGHT_JUNCTION_ORGANIZATION	0.047694	-0.222278	7.76369	2.08516e-14	2.3e-13	21.8053
GOBP_RESPONSE_TO_CISPLATIN	0.141596	-0.215666	7.74953	2.31632e-14	2.55129e-13	21.7022
GOBP_CELL_MATURATION	0.0419452	-0.154679	7.73954	2.4944e-14	2.74348e-13	21.6295
GOBP_NEGATIVE_REGULATION_OF_HUMORAL_IMMUNE_RESPONSE	0.191489	-0.267143	7.73438	2.59152e-14	2.8462e-13	21.5921
GOBP_AMINO_ACID_BETAINE_TRANSPORT	0.188397	-0.356594	7.72838	2.70911e-14	2.97108e-13	21.5485
GOBP_REGULATION_OF_RESPONSE_TO_STRESS	0.0235516	-0.29218	7.7166	2.95584e-14	3.23703e-13	21.4631
GOBP_ENDOPLASMIC_RETICULUM_CALCIUM_ION_HOMEOSTASIS	0.151276	-0.268676	7.71118	3.0764e-14	3.36423e-13	21.4239
GOBP_NUCLEOSIDE_TRANSPORT	0.103842	0.179641	7.70783	3.15344e-14	3.44356e-13	21.3996
GOBP_ADHERENS_JUNCTION_ORGANIZATION	0.080246	-0.235049	7.70756	3.15971e-14	3.44548e-13	21.3977
GOBP_REGULATION_OF_INTRACELLULAR_SIGNAL_TRANSDUCTION	0.0196326	-0.258348	7.70694	3.17428e-14	3.45644e-13	21.3931
GOBP_POSITIVE_REGULATION_OF_OSTEOCLAST_DIFFERENTIATION	-0.083072	-0.156057	-7.70655	3.18356e-14	3.45961e-13	21.3903
GOBP_SMOOTHENED_SIGNALING_PATHWAY	0.0515046	-0.213733	7.70643	3.18625e-14	3.45961e-13	21.3895
GOBP_PROTEIN_LOCALIZATION_TO_ENDOPLASMIC_RETICULUM_EXIT_SITE	0.182626	-0.538311	7.70244	3.2815e-14	3.55798e-13	21.3606
GOBP_REGULATION_OF_CYTOSKELETON_ORGANIZATION	0.0289262	-0.280956	7.69953	3.35266e-14	3.62999e-13	21.3395
GOBP_CYTOPLASMIC_PATTERN_RECOGNITION_RECEPTOR_SIGNALING_PATHWAY_IN_RESPONSE_TO_VIRUS	0.0781458	-0.449391	7.69302	3.51753e-14	3.80311e-13	21.2925
GOBP_POSITIVE_REGULATION_OF_TYPE_2_IMMUNE_RESPONSE	0.0911549	0.0843899	7.68541	3.72045e-14	4.01682e-13	21.2375
GOBP_REGULATION_OF_RESPONSE_TO_ENDOPLASMIC_RETICULUM_STRESS	0.0600262	-0.451109	7.68508	3.72944e-14	4.02085e-13	21.2351
GOBP_ALPHA_BETA_T_CELL_DIFFERENTIATION	0.0368345	-0.256	7.67883	3.90509e-14	4.20429e-13	21.19
GOBP_POSITIVE_REGULATION_OF_KIDNEY_DEVELOPMENT	0.182778	-0.331706	7.66761	4.24099e-14	4.55952e-13	21.109
GOBP_CHLORIDE_TRANSPORT	0.0383304	-0.091729	7.66725	4.25222e-14	4.56516e-13	21.1065
GOBP_DEFENSE_RESPONSE_TO_OTHER_ORGANISM	0.0201151	-0.346827	7.66694	4.26175e-14	4.56898e-13	21.1043
GOBP_REGULATION_OF_B_CELL_PROLIFERATION	0.0567012	-0.125168	7.66497	4.32395e-14	4.62917e-13	21.0901
GOBP_CELL_CELL_SIGNALING	0.0153617	-0.164187	7.6645	4.33876e-14	4.63853e-13	21.0867
GOBP_GOLGI_TO_PLASMA_MEMBRANE_PROTEIN_TRANSPORT	0.0966057	-0.410942	7.662	4.41927e-14	4.718e-13	21.0687
GOBP_POSITIVE_REGULATION_OF_CD4_POSITIVE_ALPHA_BETA_T_CELL_DIFFERENTIATION	0.0461996	-0.515635	7.65349	4.70431e-14	5.0153e-13	21.0074
GOBP_CONNECTIVE_TISSUE_DEVELOPMENT	0.0358932	-0.0153948	7.6488	4.86902e-14	5.18367e-13	20.9736
GOBP_MONOCARBOXYLIC_ACID_METABOLIC_PROCESS	0.0408552	-0.240241	7.64523	4.99811e-14	5.31371e-13	20.948
GOBP_MYOBLAST_FUSION	0.0730472	-0.457055	7.64481	5.01342e-14	5.32258e-13	20.945
GOBP_RNA_STABILIZATION	-0.0821784	-0.246725	-7.64261	5.09496e-14	5.40165e-13	20.9292
GOBP_T_CELL_ACTIVATION_INVOLVED_IN_IMMUNE_RESPONSE	0.0350803	-0.349249	7.63155	5.52485e-14	5.8493e-13	20.8498
GOBP_POSITIVE_REGULATION_OF_RECEPTOR_MEDIATED_ENDOCYTOSIS	0.0751346	-0.164489	7.62462	5.81201e-14	6.14481e-13	20.8001
GOBP_PROTEIN_LOCALIZATION_TO_CYTOPLASMIC_STRESS_GRANULE	-0.213565	-0.310598	-7.62413	5.83322e-14	6.15872e-13	20.7965
GOBP_REGULATION_OF_ACTIN_FILAMENT_BUNDLE_ASSEMBLY	0.0547928	-0.266135	7.61682	6.15321e-14	6.48761e-13	20.7442
GOBP_POSITIVE_REGULATION_OF_BINDING	-0.0449909	-0.281139	-7.6089	6.51953e-14	6.86437e-13	20.6875
GOBP_NEGATIVE_REGULATION_OF_INFLAMMATORY_RESPONSE_TO_ANTIGENIC_STIMULUS	0.094186	-0.40767	7.60326	6.79369e-14	7.14319e-13	20.6471
GOBP_MONOCYTE_CHEMOTAXIS	-0.0495636	-0.353486	-7.59866	7.02567e-14	7.37695e-13	20.6142
GOBP_PROTEIN_CATABOLIC_PROCESS_IN_THE_VACUOLE	0.109045	-0.417649	7.59771	7.07431e-14	7.41783e-13	20.6074
GOBP_INFLAMMATORY_RESPONSE	0.0240393	-0.243803	7.59697	7.11236e-14	7.44751e-13	20.6022
GOBP_ENDOMEMBRANE_SYSTEM_ORGANIZATION	0.0371768	-0.315473	7.59593	7.16659e-14	7.49404e-13	20.5947
GOBP_S_SHAPED_BODY_MORPHOGENESIS	0.157391	-0.26305	7.59565	7.18162e-14	7.49949e-13	20.5927
GOBP_REGULATION_OF_ANGIOTENSIN_LEVELS_IN_BLOOD	0.199887	-0.304298	7.58628	7.68888e-14	8.01825e-13	20.5258
GOBP_DETECTION_OF_BIOTIC_STIMULUS	0.0391948	-0.618116	7.57382	8.41858e-14	8.76725e-13	20.4369
GOBP_REGULATION_OF_SIGNAL_TRANSDUCTION_BY_P53_CLASS_MEDIATOR	-0.048384	-0.324091	-7.57203	8.52907e-14	8.87023e-13	20.4241
GOBP_POST_GOLGI_VESICLE_MEDIATED_TRANSPORT	0.062153	-0.370742	7.56522	8.96181e-14	9.30762e-13	20.3756
GOBP_ACYLGLYCEROL_HOMEOSTASIS	0.0956238	-0.142271	7.56393	9.04618e-14	9.38249e-13	20.3664
GOBP_MAINTENANCE_OF_SISTER_CHROMATID_COHESION	0.12908	-0.389517	7.55861	9.40222e-14	9.73856e-13	20.3286
GOBP_NEGATIVE_REGULATION_OF_MRNA_CATABOLIC_PROCESS	-0.0843171	-0.214196	-7.55755	9.4752e-14	9.80087e-13	20.321
GOBP_COLLAGEN_FIBRIL_ORGANIZATION	0.0436514	-0.0396015	7.55572	9.6015e-14	9.91809e-13	20.308
GOBP_PROSTATE_GLAND_GROWTH	0.10894	-0.219168	7.55525	9.63475e-14	9.939e-13	20.3046
GOBP_ANIMAL_ORGAN_MATURATION	0.0981973	-0.0983318	7.55315	9.78264e-14	1.0078e-12	20.2897
GOBP_INORGANIC_ION_TRANSMEMBRANE_TRANSPORT	0.0255278	-0.127914	7.55117	9.92369e-14	1.02095e-12	20.2757
GOBP_NEGATIVE_REGULATION_OF_MORPHOGENESIS_OF_AN_EPITHELIUM	0.0270967	-0.273781	7.54813	1.01448e-13	1.04229e-12	20.2541
GOBP_NEGATIVE_REGULATION_OF_MYELOID_LEUKOCYTE_MEDIATED_IMMUNITY	0.131343	-0.0304081	7.54711	1.02202e-13	1.04864e-12	20.2468
GOBP_POSITIVE_REGULATION_OF_ACUTE_INFLAMMATORY_RESPONSE	0.0777373	-0.415038	7.53531	1.11327e-13	1.14073e-12	20.163
GOBP_VESICLE_MEDIATED_TRANSPORT	0.024545	-0.301383	7.53249	1.13621e-13	1.16268e-12	20.143
GOBP_POSITIVE_REGULATION_OF_P38MAPK_CASCADE	0.0908918	-0.33831	7.53145	1.14482e-13	1.16992e-12	20.1356
GOBP_EPITHELIAL_TUBE_BRANCHING_INVOLVED_IN_LUNG_MORPHOGENESIS	0.0661267	-0.332771	7.53082	1.15007e-13	1.17372e-12	20.1311
GOBP_CGMP_METABOLIC_PROCESS	0.0866398	0.34053	7.52401	1.20807e-13	1.23079e-12	20.0829
GOBP_NEGATIVE_REGULATION_OF_MONOOXYGENASE_ACTIVITY	-0.102734	0.241393	-7.52388	1.20921e-13	1.23079e-12	20.082
GOBP_REGULATION_OF_CD4_POSITIVE_CD25_POSITIVE_ALPHA_BETA_REGULATORY_T_CELL_DIFFERENTIATION	0.0499729	-0.847126	7.51959	1.24735e-13	1.26792e-12	20.0516
GOBP_MIRNA_METABOLIC_PROCESS	0.0996741	-0.344806	7.51583	1.28167e-13	1.30108e-12	20.025
GOBP_SMALL_MOLECULE_METABOLIC_PROCESS	0.0294605	-0.258632	7.50883	1.34818e-13	1.36555e-12	19.9754
GOBP_REGULATION_OF_WNT_SIGNALING_PATHWAY	0.0362296	-0.208589	7.50877	1.34876e-13	1.36555e-12	19.975
GOBP_FATTY_ACYL_COA_METABOLIC_PROCESS	0.0846822	-0.23119	7.50821	1.35419e-13	1.36924e-12	19.971
GOBP_MICROTUBULE_BASED_PROCESS	0.0233105	-0.218435	7.5053	1.38293e-13	1.39645e-12	19.9505
GOBP_LYMPHOCYTE_MIGRATION	0.0319597	-0.26513	7.50469	1.389e-13	1.40073e-12	19.9462
GOBP_REGULATION_OF_CARBOHYDRATE_METABOLIC_PROCESS	0.0466995	-0.200154	7.49689	1.46941e-13	1.47986e-12	19.891
GOBP_REGULATION_OF_CELLULAR_COMPONENT_SIZE	0.034255	-0.256784	7.49555	1.48371e-13	1.4923e-12	19.8815
GOBP_PHENOL_CONTAINING_COMPOUND_METABOLIC_PROCESS	0.0419301	-0.0111386	7.49405	1.49979e-13	1.50649e-12	19.871
GOBP_REGULATION_OF_TRAIL_ACTIVATED_APOPTOTIC_SIGNALING_PATHWAY	-0.197386	-0.508578	-7.49387	1.50178e-13	1.50651e-12	19.8697
GOBP_NERVOUS_SYSTEM_PROCESS	0.0156989	-0.0623299	7.49305	1.51068e-13	1.51346e-12	19.8639
GOBP_REGULATION_OF_WOUND_HEALING	0.0508961	-0.0993078	7.49231	1.51879e-13	1.51958e-12	19.8586
GOBP_REGULATION_OF_TRANSLATIONAL_INITIATION	-0.0802317	-0.368059	-7.48739	1.57351e-13	1.57227e-12	19.824
GOBP_COLLAGEN_CATABOLIC_PROCESS	0.0708822	0.0217431	7.47012	1.78173e-13	1.778e-12	19.7022
GOBP_ENDOPLASMIC_RETICULUM_TO_CYTOSOL_TRANSPORT	0.118873	-0.355361	7.4658	1.83778e-13	1.83155e-12	19.6719
GOBP_REGULATION_OF_P38MAPK_CASCADE	0.084165	-0.246974	7.46409	1.86052e-13	1.8518e-12	19.6598
GOBP_DEFENSE_RESPONSE_TO_FUNGUS	-0.0946383	-0.276445	-7.46391	1.86295e-13	1.8518e-12	19.6585
GOBP_PHOSPHATE_ION_TRANSPORT	0.106244	-0.237865	7.45643	1.96577e-13	1.95147e-12	19.6059
GOBP_GLYCEROLIPID_BIOSYNTHETIC_PROCESS	0.0279984	-0.258598	7.45458	1.99202e-13	1.97425e-12	19.5929
GOBP_REGULATION_OF_ACUTE_INFLAMMATORY_RESPONSE_TO_ANTIGENIC_STIMULUS	0.159952	-0.427321	7.45429	1.99617e-13	1.97425e-12	19.5909
GOBP_TROPHECTODERMAL_CELL_DIFFERENTIATION	-0.108571	-0.325881	-7.45427	1.99646e-13	1.97425e-12	19.5907
GOBP_REGULATION_OF_PROTEIN_SECRETION	0.0315124	-0.174636	7.44945	2.0667e-13	2.04106e-12	19.5568
GOBP_POSITIVE_REGULATION_OF_PROTEIN_DEACETYLATION	0.0936384	-0.366896	7.44847	2.08116e-13	2.05269e-12	19.55
GOBP_INTERLEUKIN_6_PRODUCTION	0.0285427	-0.303281	7.44818	2.08556e-13	2.05439e-12	19.5479
GOBP_CD4_POSITIVE_CD25_POSITIVE_ALPHA_BETA_REGULATORY_T_CELL_DIFFERENTIATION	0.0520315	-0.758826	7.44692	2.10445e-13	2.07032e-12	19.5391
GOBP_EOSINOPHIL_MIGRATION	-0.0772993	-0.501493	-7.44394	2.14986e-13	2.11228e-12	19.5182
GOBP_RETINA_VASCULATURE_MORPHOGENESIS_IN_CAMERA_TYPE_EYE	0.119912	0.0682248	7.43804	2.24271e-13	2.20068e-12	19.4768
GOBP_COBALT_ION_TRANSPORT	0.149927	-0.455713	7.43619	2.27258e-13	2.22713e-12	19.4638
GOBP_POSITIVE_REGULATION_OF_UBIQUITIN_PROTEIN_LIGASE_ACTIVITY	-0.133171	-0.100336	-7.434	2.30853e-13	2.25947e-12	19.4484
GOBP_REGULATION_OF_BLOOD_BRAIN_BARRIER_PERMEABILITY	0.139627	-0.244594	7.42378	2.4835e-13	2.42761e-12	19.3769
GOBP_NEGATIVE_REGULATION_OF_CELL_CYCLE_G1_S_PHASE_TRANSITION	0.0663274	-0.378682	7.42194	2.51647e-13	2.45669e-12	19.364
GOBP_POSITIVE_REGULATION_OF_WOUND_HEALING	0.0680474	-0.168046	7.41018	2.73694e-13	2.66851e-12	19.2817
GOBP_NEGATIVE_REGULATION_OF_CYTOSKELETON_ORGANIZATION	0.0409867	-0.25766	7.40957	2.74887e-13	2.67674e-12	19.2774
GOBP_ACTIVATED_T_CELL_PROLIFERATION	-0.0405889	-0.153526	-7.40407	2.85894e-13	2.78038e-12	19.239
GOBP_MICROVILLUS_ORGANIZATION	0.0929123	-0.262671	7.40327	2.87526e-13	2.79269e-12	19.2334
GOBP_SENSORY_PERCEPTION_OF_SWEET_TASTE	0.102563	-0.207615	7.40109	2.92026e-13	2.82921e-12	19.2182
GOBP_SENSORY_PERCEPTION_OF_UMAMI_TASTE	0.102563	-0.207615	7.40109	2.92026e-13	2.82921e-12	19.2182
GOBP_RESPONSE_TO_VITAMIN	0.0661832	-0.0102519	7.40056	2.93133e-13	2.83634e-12	19.2145
GOBP_GOLGI_RIBBON_FORMATION	0.129106	-0.350344	7.39665	3.01416e-13	2.9128e-12	19.1872
GOBP_CARDIOLIPIN_BIOSYNTHETIC_PROCESS	0.140887	-0.512477	7.38651	3.23982e-13	3.12691e-12	19.1165
GOBP_NEGATIVE_REGULATION_OF_CELL_DIFFERENTIATION	0.0283555	-0.206063	7.38118	3.36515e-13	3.24378e-12	19.0793
GOBP_POSITIVE_REGULATION_OF_SIGNALING_RECEPTOR_ACTIVITY	-0.0659091	-0.139686	-7.37808	3.44019e-13	3.31194e-12	19.0577
GOBP_CELL_DIFFERENTIATION_INVOLVED_IN_EMBRYONIC_PLACENTA_DEVELOPMENT	0.098378	-0.209311	7.3723	3.58437e-13	3.4464e-12	19.0175
GOBP_POSITIVE_REGULATION_OF_DENDRITIC_CELL_DIFFERENTIATION	-0.147023	-0.590729	-7.36695	3.72339e-13	3.57558e-12	18.9803
GOBP_POSITIVE_REGULATION_OF_DNA_BINDING	-0.0838045	-0.153522	-7.35789	3.97073e-13	3.80831e-12	18.9173
GOBP_VENTRICULAR_CARDIAC_MUSCLE_TISSUE_MORPHOGENESIS	0.0899012	-0.0797528	7.35713	3.99194e-13	3.82386e-12	18.9121
GOBP_REGULATION_OF_HISTONE_DEACETYLATION	0.073537	-0.341102	7.35607	4.02211e-13	3.84793e-12	18.9047
GOBP_REGULATION_OF_PROTEIN_KINASE_C_ACTIVITY	0.177796	0.168976	7.35383	4.0867e-13	3.90484e-12	18.8891
GOBP_POSITIVE_REGULATION_OF_NITRIC_OXIDE_MEDIATED_SIGNAL_TRANSDUCTION	0.168485	0.266264	7.35196	4.14119e-13	3.95197e-12	18.8761
GOBP_NEGATIVE_REGULATION_OF_INTRACELLULAR_SIGNAL_TRANSDUCTION	0.0271427	-0.285115	7.35122	4.16289e-13	3.96772e-12	18.871
GOBP_CYCLIC_NUCLEOTIDE_CATABOLIC_PROCESS	0.0769702	-0.052301	7.35086	4.17368e-13	3.97305e-12	18.8685
GOBP_REGULATION_OF_CELLULAR_AMIDE_METABOLIC_PROCESS	-0.0382276	-0.32852	-7.34785	4.26357e-13	4.05357e-12	18.8476
GOBP_COMMISSURAL_NEURON_AXON_GUIDANCE	0.11639	-0.110099	7.34725	4.2816e-13	4.06566e-12	18.8435
GOBP_DENDRITIC_CELL_ANTIGEN_PROCESSING_AND_PRESENTATION	0.0679866	-0.70951	7.3415	4.45963e-13	4.22945e-12	18.8036
GOBP_RECEPTOR_MEDIATED_ENDOCYTOSIS	0.0416901	-0.290601	7.33966	4.51821e-13	4.2797e-12	18.7908
GOBP_BLOOD_VESSEL_ENDOTHELIAL_CELL_PROLIFERATION_INVOLVED_IN_SPROUTING_ANGIOGENESIS	0.0886092	0.0707379	7.32747	4.92509e-13	4.65662e-12	18.7064
GOBP_ATP_TRANSPORT	-0.116635	-0.348951	-7.32737	4.92832e-13	4.65662e-12	18.7057
GOBP_REGULATION_OF_SUPRAMOLECULAR_FIBER_ORGANIZATION	0.0317128	-0.333432	7.32471	5.02189e-13	4.73918e-12	18.6873
GOBP_ION_TRANSMEMBRANE_TRANSPORT	0.0216632	-0.147414	7.32339	5.06917e-13	4.7779e-12	18.6781
GOBP_CYCLIC_NUCLEOTIDE_METABOLIC_PROCESS	0.0331453	0.267898	7.32253	5.10001e-13	4.80104e-12	18.6722
GOBP_REGULATION_OF_ACTIN_FILAMENT_ORGANIZATION	0.0386135	-0.327289	7.32226	5.10987e-13	4.80441e-12	18.6703
GOBP_REGULATION_OF_METALLOPEPTIDASE_ACTIVITY	0.120425	-0.44741	7.31196	5.49501e-13	5.16018e-12	18.5992
GOBP_NEGATIVE_REGULATION_OF_IMMUNE_SYSTEM_PROCESS	0.0238128	-0.317164	7.30891	5.61468e-13	5.26608e-12	18.5781
GOBP_CALCIUM_ION_IMPORT	-0.0368564	-0.222093	-7.3087	5.6229e-13	5.26733e-12	18.5766
GOBP_REGULATION_OF_IMMUNE_SYSTEM_PROCESS	0.0178972	-0.324959	7.3085	5.63074e-13	5.26822e-12	18.5753
GOBP_EPIBOLY	0.0638129	-0.359402	7.30297	5.85481e-13	5.47117e-12	18.5371
GOBP_CELLULAR_RESPONSE_TO_COCAINE	0.0881782	-0.575661	7.30211	5.89034e-13	5.49765e-12	18.5312
GOBP_ATTACHMENT_OF_GPI_ANCHOR_TO_PROTEIN	0.143576	-0.379603	7.30025	5.96798e-13	5.56333e-12	18.5183
GOBP_ACIDIC_AMINO_ACID_TRANSPORT	0.0512822	-0.239118	7.29694	6.10907e-13	5.68791e-12	18.4955
GOBP_OSSIFICATION_INVOLVED_IN_BONE_REMODELING	0.186885	-0.2138	7.2933	6.26749e-13	5.82831e-12	18.4704
GOBP_INTESTINAL_LIPID_ABSORPTION	0.109661	-0.25677	7.29141	6.35126e-13	5.89903e-12	18.4574
GOBP_EOSINOPHIL_CHEMOTAXIS	-0.0801862	-0.538533	-7.28798	6.50658e-13	6.03596e-12	18.4338
GOBP_RESPONSE_TO_ENDOGENOUS_STIMULUS	0.025907	-0.233776	7.28691	6.55557e-13	6.07404e-12	18.4264
GOBP_NEGATIVE_REGULATION_OF_WNT_SIGNALING_PATHWAY	0.0400959	-0.146462	7.28259	6.7582e-13	6.25419e-12	18.3966
GOBP_POSITIVE_REGULATION_OF_VIRAL_LIFE_CYCLE	0.0996302	-0.512354	7.27254	7.2523e-13	6.70334e-12	18.3275
GOBP_REGULATION_OF_PROTEIN_LOCALIZATION	0.0282475	-0.254008	7.26611	7.58714e-13	7.00436e-12	18.2834
GOBP_SEQUESTERING_OF_IRON_ION	-0.260611	-0.356517	-7.26463	7.66651e-13	7.0691e-12	18.2732
GOBP_REGULATION_OF_CELL_SUBSTRATE_ADHESION	0.0371775	-0.207169	7.26097	7.86591e-13	7.24422e-12	18.248
GOBP_STEROL_BIOSYNTHETIC_PROCESS	0.0664499	-0.330834	7.25839	8.00981e-13	7.36787e-12	18.2303
GOBP_RESPONSE_TO_MOLECULE_OF_BACTERIAL_ORIGIN	-0.0278748	-0.205636	-7.25711	8.08167e-13	7.42503e-12	18.2216
GOBP_REGULATION_OF_COLLAGEN_FIBRIL_ORGANIZATION	0.0686286	-0.466176	7.24892	8.55885e-13	7.854e-12	18.1654
GOBP_APOPTOTIC_PROCESS_IN_BONE_MARROW_CELL	0.196777	-0.449601	7.24776	8.6291e-13	7.90897e-12	18.1574
GOBP_NEGATIVE_REGULATION_OF_CARDIOCYTE_DIFFERENTIATION	0.0870115	0.248452	7.24737	8.6526e-13	7.92102e-12	18.1547
GOBP_ASPARTATE_TRANSMEMBRANE_TRANSPORT	0.135698	0.115241	7.247	8.67485e-13	7.93189e-12	18.1522
GOBP_COBALAMIN_METABOLIC_PROCESS	0.130076	-0.510884	7.24651	8.70464e-13	7.94962e-12	18.1489
GOBP_POSITIVE_REGULATION_OF_CYTOPLASMIC_TRANSLATION	-0.154429	-0.430029	-7.24517	8.78677e-13	8.01504e-12	18.1397
GOBP_CEREBELLAR_PURKINJE_CELL_LAYER_FORMATION	0.135351	-0.32446	7.24279	8.93448e-13	8.14007e-12	18.1234
GOBP_CALMODULIN_DEPENDENT_KINASE_SIGNALING_PATHWAY	0.15399	-0.285329	7.24233	8.96319e-13	8.1565e-12	18.1202
GOBP_LIPOPROTEIN_CATABOLIC_PROCESS	0.124568	-0.367337	7.24103	9.04543e-13	8.2176e-12	18.1113
GOBP_MENAQUINONE_METABOLIC_PROCESS	0.0472977	0.5566	7.24092	9.05183e-13	8.2176e-12	18.1106
GOBP_JNK_CASCADE	0.0339698	-0.262812	7.23909	9.16883e-13	8.31394e-12	18.098
GOBP_POSITIVE_REGULATION_OF_DEVELOPMENTAL_PROCESS	0.0226084	-0.208459	7.23838	9.2145e-13	8.34545e-12	18.0932
GOBP_ION_TRANSPORT	0.0173494	-0.157024	7.23814	9.23014e-13	8.34973e-12	18.0915
GOBP_MORPHOGENESIS_OF_AN_EPITHELIAL_SHEET	0.0503617	-0.238351	7.23217	9.62308e-13	8.6949e-12	18.0507
GOBP_REGULATION_OF_MEMBRANE_REPOLARIZATION_DURING_CARDIAC_MUSCLE_CELL_ACTION_POTENTIAL	0.146673	0.0398105	7.231	9.70237e-13	8.75619e-12	18.0427
GOBP_PEPTIDE_ANTIGEN_ASSEMBLY_WITH_MHC_CLASS_II_PROTEIN_COMPLEX	0.0241403	-0.872167	7.22953	9.80264e-13	8.83625e-12	18.0326
GOBP_REGULATION_OF_RAS_PROTEIN_SIGNAL_TRANSDUCTION	0.0296132	-0.225584	7.22901	9.83799e-13	8.85766e-12	18.0291
GOBP_ENSHEATHMENT_OF_NEURONS	0.0376224	-0.162898	7.22641	1.00182e-12	9.00928e-12	18.0113
GOBP_CEREBELLAR_PURKINJE_CELL_LAYER_DEVELOPMENT	0.110237	-0.22384	7.22339	1.02322e-12	9.19094e-12	17.9906
GOBP_POSITIVE_REGULATION_OF_T_CELL_MEDIATED_IMMUNITY	0.0291627	-0.63716	7.21943	1.05184e-12	9.43692e-12	17.9636
GOBP_CELLULAR_RESPONSE_TO_ACID_CHEMICAL	0.054621	-0.227279	7.21914	1.05401e-12	9.44528e-12	17.9616
GOBP_CEREBELLAR_PURKINJE_CELL_LAYER_MORPHOGENESIS	0.113703	-0.245622	7.21354	1.09597e-12	9.80979e-12	17.9234
GOBP_POSITIVE_REGULATION_OF_B_CELL_PROLIFERATION	0.0641043	-0.218718	7.21248	1.10415e-12	9.87149e-12	17.9161
GOBP_COLLAGEN_METABOLIC_PROCESS	0.0434709	-0.0873215	7.21209	1.10717e-12	9.88157e-12	17.9135
GOBP_MONOCARBOXYLIC_ACID_CATABOLIC_PROCESS	0.0675514	-0.256137	7.212	1.10786e-12	9.88157e-12	17.9129
GOBP_REGULATION_OF_BONE_MINERALIZATION_INVOLVED_IN_BONE_MATURATION	0.104294	-0.503662	7.17893	1.39446e-12	1.24233e-11	17.6877
GOBP_T_CELL_PROLIFERATION_INVOLVED_IN_IMMUNE_RESPONSE	-0.0618671	-0.603462	-7.17786	1.40489e-12	1.25018e-11	17.6804
GOBP_REGULATION_OF_DEVELOPMENTAL_GROWTH	0.0310219	-0.116204	7.17488	1.43424e-12	1.2748e-11	17.6602
GOBP_CELL_DIFFERENTIATION_INVOLVED_IN_KIDNEY_DEVELOPMENT	0.0530969	-0.101852	7.15613	1.63339e-12	1.45013e-11	17.533
GOBP_NEGATIVE_REGULATION_OF_FAT_CELL_DIFFERENTIATION	0.049986	-0.191475	7.15151	1.68643e-12	1.49548e-11	17.5018
GOBP_DEVELOPMENTAL_PROCESS_INVOLVED_IN_REPRODUCTION	0.0188777	-0.179437	7.15021	1.70174e-12	1.50731e-11	17.4929
GOBP_CELLULAR_MONOVALENT_INORGANIC_CATION_HOMEOSTASIS	0.0555844	-0.238594	7.14927	1.71284e-12	1.51539e-11	17.4866
GOBP_URATE_METABOLIC_PROCESS	0.160789	-0.206899	7.14798	1.72822e-12	1.52723e-11	17.4778
GOBP_LIPID_DROPLET_ORGANIZATION	0.0963796	-0.158292	7.1445	1.7703e-12	1.5626e-11	17.4543
GOBP_REGULATION_OF_MITOCHONDRIAL_ATP_SYNTHESIS_COUPLED_ELECTRON_TRANSPORT	-0.231778	-0.26056	-7.13132	1.93906e-12	1.70959e-11	17.3652
GOBP_NEGATIVE_REGULATION_OF_TRANSMEMBRANE_TRANSPORT	-0.0458389	-0.186534	-7.12639	2.00627e-12	1.76681e-11	17.3319
GOBP_CELLULAR_RESPONSE_TO_GROWTH_HORMONE_STIMULUS	0.115138	-0.378495	7.12615	2.00959e-12	1.7677e-11	17.3303
GOBP_NEGATIVE_REGULATION_OF_VOLTAGE_GATED_POTASSIUM_CHANNEL_ACTIVITY	-0.151873	0.168908	-7.11772	2.12982e-12	1.8713e-11	17.2734
GOBP_ADENYLATE_CYCLASE_ACTIVATING_ADRENERGIC_RECEPTOR_SIGNALING_PATHWAY_INVOLVED_IN_HEART_PROCESS	0.135839	-0.322022	7.10737	2.28722e-12	2.00729e-11	17.2037
GOBP_REGULATION_OF_CELL_POPULATION_PROLIFERATION	0.0196208	-0.255978	7.10571	2.3136e-12	2.02729e-11	17.1925
GOBP_COMMA_SHAPED_BODY_MORPHOGENESIS	0.205143	-0.389788	7.1056	2.31531e-12	2.02729e-11	17.1917
GOBP_REGULATION_OF_GLUCOSE_METABOLIC_PROCESS	0.0494742	-0.222334	7.09977	2.41004e-12	2.10734e-11	17.1525
GOBP_CELL_SURFACE_RECEPTOR_SIGNALING_PATHWAY_INVOLVED_IN_CELL_CELL_SIGNALING	0.0260833	-0.184551	7.09964	2.41225e-12	2.10734e-11	17.1516
GOBP_POSITIVE_REGULATION_OF_PROTEIN_PHOSPHORYLATION	0.0206985	-0.229743	7.09723	2.45259e-12	2.14014e-11	17.1354
GOBP_NEGATIVE_REGULATION_OF_MAST_CELL_ACTIVATION_INVOLVED_IN_IMMUNE_RESPONSE	0.183216	-0.305454	7.09689	2.45832e-12	2.14269e-11	17.1331
GOBP_NEGATIVE_REGULATION_OF_THYMOCYTE_APOPTOTIC_PROCESS	0.182408	-0.104109	7.09091	2.56137e-12	2.22997e-11	17.093
GOBP_NEGATIVE_REGULATION_OF_CELL_CELL_ADHESION	0.0357956	-0.258124	7.08208	2.72153e-12	2.36671e-11	17.0337
GOBP_NEGATIVE_REGULATION_OF_DENDRITIC_SPINE_MORPHOGENESIS	0.127536	-0.469728	7.07585	2.84041e-12	2.46728e-11	16.9918
GOBP_POSTTRANSCRIPTIONAL_REGULATION_OF_GENE_EXPRESSION	-0.0370554	-0.329922	-7.07491	2.85883e-12	2.48047e-11	16.9855
GOBP_BIOLOGICAL_PROCESS_INVOLVED_IN_SYMBIOTIC_INTERACTION	0.035249	-0.352622	7.06591	3.04076e-12	2.63532e-11	16.9252
GOBP_POSITIVE_REGULATION_OF_CELL_MIGRATION_INVOLVED_IN_SPROUTING_ANGIOGENESIS	0.0976145	0.0204067	7.06276	3.10705e-12	2.68973e-11	16.9041
GOBP_POSITIVE_REGULATION_OF_GLYCOLYTIC_PROCESS	0.137647	-0.201257	7.06046	3.15631e-12	2.72928e-11	16.8887
GOBP_REGULATION_OF_CELLULAR_PH	0.0591078	-0.275936	7.05725	3.22641e-12	2.78674e-11	16.8672
GOBP_NEGATIVE_REGULATION_OF_CELL_DEVELOPMENT	0.0336835	-0.131355	7.05332	3.31433e-12	2.85945e-11	16.841
GOBP_CELL_ADHESION_MEDIATED_BY_INTEGRIN	0.0484086	-0.212015	7.04946	3.40293e-12	2.93258e-11	16.8152
GOBP_ANATOMICAL_STRUCTURE_ARRANGEMENT	0.123452	-0.128111	7.04831	3.42994e-12	2.95253e-11	16.8074
GOBP_EMBRYONIC_PROCESS_INVOLVED_IN_FEMALE_PREGNANCY	-0.293038	-0.239558	-7.04578	3.48977e-12	3.00065e-11	16.7905
GOBP_REGULATION_OF_PEPTIDASE_ACTIVITY	0.0371832	-0.31676	7.04519	3.50379e-12	3.00932e-11	16.7866
GOBP_SMALL_MOLECULE_BIOSYNTHETIC_PROCESS	0.0297213	-0.25145	7.04137	3.59643e-12	3.08542e-11	16.7611
GOBP_TROPHOBLAST_GIANT_CELL_DIFFERENTIATION	-0.109707	0.00257952	-7.0409	3.60806e-12	3.09193e-11	16.7579
GOBP_AMYLOID_BETA_FORMATION	0.0759848	-0.272881	7.03919	3.65039e-12	3.1247e-11	16.7465
GOBP_INTRACELLULAR_RECEPTOR_SIGNALING_PATHWAY	0.0356488	-0.344728	7.03828	3.67304e-12	3.14057e-11	16.7405
GOBP_NEGATIVE_REGULATION_OF_CELL_ACTIVATION	0.0240434	-0.289835	7.0286	3.92389e-12	3.35131e-11	16.6759
GOBP_PROTEIN_NEDDYLATION	-0.11119	-0.373719	-7.02259	4.08807e-12	3.48764e-11	16.6358
GOBP_REGULATION_OF_SALIVA_SECRETION	0.168895	-0.414456	7.01994	4.16241e-12	3.5471e-11	16.6182
GOBP_REGULATION_OF_COMPLEMENT_ACTIVATION_CLASSICAL_PATHWAY	0.180335	-0.107129	7.01917	4.18416e-12	3.56166e-11	16.6131
GOBP_SECONDARY_PALATE_DEVELOPMENT	0.0476441	0.258704	7.01662	4.25746e-12	3.62003e-11	16.5961
GOBP_INTRINSIC_APOPTOTIC_SIGNALING_PATHWAY_IN_RESPONSE_TO_ENDOPLASMIC_RETICULUM_STRESS	0.0660525	-0.450469	7.01146	4.40976e-12	3.74535e-11	16.5618
GOBP_ICOSANOID_METABOLIC_PROCESS	0.0497766	-0.132754	7.01117	4.41836e-12	3.7485e-11	16.5599
GOBP_MORPHOGENESIS_OF_EMBRYONIC_EPITHELIUM	0.0371678	-0.227556	7.00767	4.525e-12	3.83471e-11	16.5365
GOBP_MICROTUBULE_ANCHORING_AT_MICROTUBULE_ORGANIZING_CENTER	0.104007	-0.274595	7.00226	4.69437e-12	3.97384e-11	16.5006
GOBP_ESTABLISHMENT_OR_MAINTENANCE_OF_BIPOLAR_CELL_POLARITY	0.0809222	-0.247347	7.00085	4.7398e-12	4.00786e-11	16.4912
GOBP_REPLICATION_FORK_PROTECTION	-0.139123	-0.0394431	-7.00039	4.75442e-12	4.01577e-11	16.4882
GOBP_EXOCRINE_SYSTEM_DEVELOPMENT	0.0659538	-0.237539	6.99708	4.8628e-12	4.10279e-11	16.4662
GOBP_SENSORY_PERCEPTION_OF_LIGHT_STIMULUS	0.0286415	0.0199467	6.98981	5.10881e-12	4.30559e-11	16.4179
GOBP_DETECTION_OF_OTHER_ORGANISM	0.039407	-0.746551	6.98533	5.26653e-12	4.43363e-11	16.3882
GOBP_ANTIGEN_RECEPTOR_MEDIATED_SIGNALING_PATHWAY	0.0212264	-0.351349	6.98386	5.31924e-12	4.47307e-11	16.3785
GOBP_NERVOUS_SYSTEM_PROCESS_INVOLVED_IN_REGULATION_OF_SYSTEMIC_ARTERIAL_BLOOD_PRESSURE	0.165448	-0.245206	6.98362	5.32784e-12	4.47538e-11	16.3769
GOBP_REGULATION_OF_INFLAMMATORY_RESPONSE_TO_WOUNDING	0.183966	-0.502855	6.98148	5.40554e-12	4.53567e-11	16.3627
GOBP_NEGATIVE_REGULATION_OF_LEUKOCYTE_MEDIATED_IMMUNITY	0.0272854	-0.578315	6.98016	5.45419e-12	4.57148e-11	16.354
GOBP_CELLULAR_RESPONSE_TO_SALT	-0.0665333	-0.547994	-6.97891	5.50074e-12	4.60544e-11	16.3457
GOBP_POSITIVE_REGULATION_OF_GTPASE_ACTIVITY	0.0269189	-0.209028	6.97533	5.63585e-12	4.71339e-11	16.322
GOBP_ESTABLISHMENT_OR_MAINTENANCE_OF_CELL_POLARITY	0.0397197	-0.22561	6.95883	6.30127e-12	5.26414e-11	16.2129
GOBP_REGULATION_OF_MRNA_CATABOLIC_PROCESS	-0.0502683	-0.260369	-6.95695	6.38207e-12	5.32582e-11	16.2004
GOBP_REGULATION_OF_CELL_DIFFERENTIATION	0.0215742	-0.2216	6.95522	6.45694e-12	5.38242e-11	16.189
GOBP_GROWTH_HORMONE_RECEPTOR_SIGNALING_PATHWAY_VIA_JAK_STAT	0.171674	-0.420732	6.94416	6.95757e-12	5.79343e-11	16.1161
GOBP_NCRNA_PROCESSING	-0.0352593	-0.396223	-6.94246	7.03823e-12	5.85421e-11	16.1048
GOBP_LIPOPROTEIN_METABOLIC_PROCESS	0.040444	-0.298537	6.94005	7.15314e-12	5.94332e-11	16.089
GOBP_REGULATION_OF_CARBOHYDRATE_BIOSYNTHETIC_PROCESS	0.0464286	-0.145567	6.93837	7.23508e-12	6.00488e-11	16.0778
GOBP_NEGATIVE_REGULATION_OF_NITRIC_OXIDE_SYNTHASE_ACTIVITY	-0.16573	-0.0778677	-6.93785	7.2602e-12	6.0192e-11	16.0744
GOBP_NEGATIVE_REGULATION_OF_IMMUNE_EFFECTOR_PROCESS	0.0340508	-0.49378	6.93705	7.29939e-12	6.04513e-11	16.0692
GOBP_BASEMENT_MEMBRANE_ASSEMBLY	0.104293	-0.178441	6.93689	7.3075e-12	6.04529e-11	16.0681
GOBP_TRANSCYTOSIS	0.0929291	-0.455647	6.93294	7.50473e-12	6.20084e-11	16.0421
GOBP_POSITIVE_REGULATION_OF_CELL_MIGRATION_BY_VASCULAR_ENDOTHELIAL_GROWTH_FACTOR_SIGNALING_PATHWAY	0.164111	-0.198535	6.9328	7.51174e-12	6.20084e-11	16.0412
GOBP_POSITIVE_REGULATION_OF_MYELOID_LEUKOCYTE_MEDIATED_IMMUNITY	0.0862724	-0.499879	6.92681	7.82098e-12	6.44915e-11	16.0017
GOBP_NCRNA_METABOLIC_PROCESS	-0.0304715	-0.369352	-6.91941	8.22013e-12	6.77098e-11	15.9531
GOBP_RETROGRADE_TRANSPORT_ENDOSOME_TO_GOLGI	0.054693	-0.375872	6.91581	8.42179e-12	6.92962e-11	15.9294
GOBP_INNER_EAR_MORPHOGENESIS	0.0360708	-0.00395398	6.91152	8.66835e-12	7.12482e-11	15.9012
GOBP_INTEGRIN_MEDIATED_SIGNALING_PATHWAY	0.0447006	-0.22541	6.90863	8.83801e-12	7.25647e-11	15.8823
GOBP_ESTABLISHMENT_OF_CELL_POLARITY	0.0418456	-0.188597	6.90754	8.90291e-12	7.30192e-11	15.8751
GOBP_NEGATIVE_REGULATION_OF_PINOCYTOSIS	-0.171643	-0.0982891	-6.90656	8.96185e-12	7.34238e-11	15.8687
GOBP_REGULATION_OF_ASPARTIC_TYPE_ENDOPEPTIDASE_ACTIVITY_INVOLVED_IN_AMYLOID_PRECURSOR_PROTEIN_CATABOLIC_PROCESS	0.0935272	-0.487943	6.90479	9.06914e-12	7.42232e-11	15.8571
GOBP_INTERLEUKIN_4_PRODUCTION	0.0663513	-0.435199	6.90163	9.26313e-12	7.57298e-11	15.8364
GOBP_METANEPHRIC_GLOMERULUS_VASCULATURE_DEVELOPMENT	-0.150694	0.297029	-6.90135	9.28081e-12	7.57933e-11	15.8345
GOBP_REGULATION_OF_NUCLEAR_TRANSCRIBED_MRNA_CATABOLIC_PROCESS_DEADENYLATION_DEPENDENT_DECAY	-0.111604	-0.352311	-6.89936	9.40553e-12	7.67299e-11	15.8215
GOBP_LEUKOCYTE_CELL_CELL_ADHESION	0.0214699	-0.431281	6.8989	9.43455e-12	7.68845e-11	15.8185
GOBP_NEGATIVE_REGULATION_OF_EXTRACELLULAR_MATRIX_ORGANIZATION	0.119356	0.00312124	6.89814	9.48321e-12	7.71988e-11	15.8134
GOBP_RENAL_SYSTEM_PROCESS_INVOLVED_IN_REGULATION_OF_SYSTEMIC_ARTERIAL_BLOOD_PRESSURE	0.0824698	0.0171492	6.89592	9.62496e-12	7.82694e-11	15.799
GOBP_POSITIVE_REGULATION_OF_RUFFLE_ASSEMBLY	0.105112	-0.442756	6.89157	9.91002e-12	8.05018e-11	15.7704
GOBP_POSITIVE_REGULATION_OF_ENDOTHELIAL_CELL_CHEMOTAXIS_BY_VEGF_ACTIVATED_VASCULAR_ENDOTHELIAL_GROWTH_FACTOR_RECEPTOR_SIGNALING_PATHWAY	0.217442	-0.160311	6.88904	1.00796e-11	8.17926e-11	15.7539
GOBP_RECEPTOR_CLUSTERING	0.0522755	-0.155861	6.88603	1.02849e-11	8.33239e-11	15.7342
GOBP_RESPONSE_TO_GROWTH_HORMONE	0.083511	-0.2515	6.88595	1.02901e-11	8.33239e-11	15.7337
GOBP_RESPONSE_TO_HORMONE	0.0296493	-0.258174	6.87442	1.11164e-11	8.9919e-11	15.6582
GOBP_POSITIVE_REGULATION_OF_TELOMERASE_ACTIVITY	-0.0808791	-0.303084	-6.87273	1.12424e-11	9.08423e-11	15.6472
GOBP_REGULATION_OF_WATER_LOSS_VIA_SKIN	0.0725035	-0.175013	6.86545	1.18032e-11	9.52731e-11	15.5997
GOBP_CHOLESTEROL_EFFLUX	-0.0665294	-0.222688	-6.86525	1.18192e-11	9.53017e-11	15.5983
GOBP_REGULATION_OF_CD4_POSITIVE_ALPHA_BETA_T_CELL_ACTIVATION	0.0328412	-0.400448	6.86392	1.19244e-11	9.60485e-11	15.5897
GOBP_MESENCHYME_DEVELOPMENT	0.0325047	-0.0809002	6.86196	1.20814e-11	9.72107e-11	15.5769
GOBP_SENSORY_PERCEPTION	0.0185576	-0.0306883	6.86145	1.21224e-11	9.74383e-11	15.5736
GOBP_NEGATIVE_REGULATION_OF_VIRAL_TRANSCRIPTION	-0.077016	-0.387875	-6.85908	1.23156e-11	9.8887e-11	15.5581
GOBP_METAL_ION_TRANSPORT	0.0170555	-0.134648	6.85745	1.24506e-11	9.98661e-11	15.5475
GOBP_POST_CHAPERONIN_TUBULIN_FOLDING_PATHWAY	-0.197744	-0.286491	-6.85272	1.285e-11	1.02962e-10	15.5167
GOBP_REGULATION_OF_RHO_PROTEIN_SIGNAL_TRANSDUCTION	0.0418849	-0.225911	6.84029	1.39603e-11	1.11741e-10	15.4357
GOBP_ESTABLISHMENT_OF_PROTEIN_LOCALIZATION_TO_PLASMA_MEMBRANE	0.0716762	-0.372969	6.83731	1.42393e-11	1.13855e-10	15.4164
GOBP_INTERMEDIATE_FILAMENT_BUNDLE_ASSEMBLY	0.123469	-0.125837	6.837	1.42692e-11	1.13974e-10	15.4143
GOBP_AGGREPHAGY	0.120982	-0.496781	6.83451	1.45075e-11	1.15757e-10	15.3982
GOBP_REGULATION_OF_CILIUM_MOVEMENT	0.0490625	0.00381793	6.83179	1.47725e-11	1.17749e-10	15.3805
GOBP_POSITIVE_REGULATION_OF_LYMPHOCYTE_DIFFERENTIATION	0.0354649	-0.342385	6.82847	1.51022e-11	1.20251e-10	15.3589
GOBP_CEREBRAL_CORTEX_CELL_MIGRATION	0.0611037	-0.278433	6.82616	1.53357e-11	1.21984e-10	15.3439
GOBP_GOLGI_TO_PLASMA_MEMBRANE_TRANSPORT	0.0722078	-0.374342	6.82513	1.54413e-11	1.22696e-10	15.3372
GOBP_AMYLOID_BETA_METABOLIC_PROCESS	0.0685891	-0.283646	6.82387	1.55717e-11	1.23603e-10	15.329
GOBP_METANEPHRIC_GLOMERULAR_MESANGIUM_DEVELOPMENT	-0.180979	0.22251	-6.81704	1.62942e-11	1.29204e-10	15.2847
GOBP_REGULATION_OF_ALPHA_BETA_T_CELL_DIFFERENTIATION	0.0384345	-0.346765	6.81624	1.63804e-11	1.29753e-10	15.2796
GOBP_REGULATION_OF_MEMBRANE_DEPOLARIZATION	0.0711693	-0.176175	6.81341	1.66917e-11	1.32082e-10	15.2612
GOBP_PROTEIN_LOCALIZATION_TO_BASOLATERAL_PLASMA_MEMBRANE	-0.157601	-0.425235	-6.80067	1.81627e-11	1.43573e-10	15.1787
GOBP_SKIN_DEVELOPMENT	0.0331217	-0.10403	6.79949	1.83063e-11	1.44559e-10	15.171
GOBP_POSITIVE_REGULATION_OF_PODOSOME_ASSEMBLY	0.105022	-0.511593	6.79787	1.85038e-11	1.45968e-10	15.1606
GOBP_GLYCEROLIPID_METABOLIC_PROCESS	0.0218212	-0.22858	6.79185	1.9256e-11	1.51745e-10	15.1217
GOBP_POSITIVE_REGULATION_OF_CELL_PROJECTION_ORGANIZATION	0.0259217	-0.161354	6.78198	2.05546e-11	1.61812e-10	15.0579
GOBP_REGULATION_OF_CELL_AGING	-0.0519776	-0.319288	-6.78119	2.06617e-11	1.62488e-10	15.0529
GOBP_BIOLOGICAL_PROCESS_INVOLVED_IN_INTRASPECIES_INTERACTION_BETWEEN_ORGANISMS	0.0366372	-0.166254	6.77755	2.11648e-11	1.66156e-10	15.0294
GOBP_REGULATION_OF_AEROBIC_RESPIRATION	-0.100943	-0.381987	-6.77751	2.11716e-11	1.66156e-10	15.0291
GOBP_L_GLUTAMATE_TRANSMEMBRANE_TRANSPORT	0.0855456	-0.317165	6.77059	2.21614e-11	1.73745e-10	14.9844
GOBP_REGULATION_OF_OSTEOBLAST_PROLIFERATION	0.116515	-0.277298	6.76525	2.29551e-11	1.79783e-10	14.9501
GOBP_ACTIN_FILAMENT_BASED_TRANSPORT	0.0805582	-0.379596	6.75758	2.41461e-11	1.88918e-10	14.9007
GOBP_REGULATION_OF_NUCLEAR_TRANSCRIBED_MRNA_CATABOLIC_PROCESS_NONSENSE_MEDIATED_DECAY	-0.145813	-0.392901	-6.75142	2.5147e-11	1.96548e-10	14.8611
GOBP_POSITIVE_REGULATION_OF_PROTEIN_TYROSINE_KINASE_ACTIVITY	0.0432234	-0.145022	6.74841	2.56503e-11	2.00277e-10	14.8417
GOBP_RIBOSOMAL_LARGE_SUBUNIT_EXPORT_FROM_NUCLEUS	-0.180793	-0.35596	-6.73876	2.7331e-11	2.13182e-10	14.7798
GOBP_REGULATION_OF_BODY_FLUID_LEVELS	0.0276275	-0.168332	6.72416	3.00813e-11	2.34395e-10	14.6862
GOBP_ONE_CARBON_COMPOUND_TRANSPORT	0.0878225	0.182244	6.72148	3.06138e-11	2.38301e-10	14.6691
GOBP_POSITIVE_REGULATION_OF_PHOSPHORUS_METABOLIC_PROCESS	0.0185182	-0.231674	6.72109	3.0693e-11	2.38675e-10	14.6665
GOBP_IMMUNOGLOBULIN_PRODUCTION	0.0216284	-0.557917	6.71483	3.19791e-11	2.48329e-10	14.6265
GOBP_ORGANIC_ACID_METABOLIC_PROCESS	0.0321594	-0.253438	6.71473	3.19995e-11	2.48329e-10	14.6258
GOBP_CELLULAR_RESPONSE_TO_VASCULAR_ENDOTHELIAL_GROWTH_FACTOR_STIMULUS	0.0538033	-0.0326621	6.71051	3.2896e-11	2.55028e-10	14.5989
GOBP_L_ALPHA_AMINO_ACID_TRANSMEMBRANE_TRANSPORT	0.0608822	-0.168115	6.70693	3.36778e-11	2.60824e-10	14.576
GOBP_REGULATION_OF_CARDIAC_MUSCLE_CELL_MEMBRANE_REPOLARIZATION	0.067074	0.0465279	6.70516	3.40693e-11	2.63589e-10	14.5647
GOBP_DETECTION_OF_EXTERNAL_BIOTIC_STIMULUS	0.0334837	-0.722026	6.70403	3.43229e-11	2.65282e-10	14.5574
GOBP_EPOXIDE_METABOLIC_PROCESS	0.136019	-0.596132	6.69829	3.5635e-11	2.75145e-10	14.5208
GOBP_REGULATION_OF_COLLAGEN_METABOLIC_PROCESS	0.0723668	0.00167145	6.69409	3.66285e-11	2.82531e-10	14.494
GOBP_NEGATIVE_REGULATION_OF_NUCLEAR_TRANSCRIBED_MRNA_CATABOLIC_PROCESS_DEADENYLATION_DEPENDENT_DECAY	-0.168055	-0.416997	-6.69328	3.68226e-11	2.83742e-10	14.4888
GOBP_REGULATION_OF_MONOCYTE_DIFFERENTIATION	0.0729491	-0.495385	6.69032	3.7542e-11	2.88994e-10	14.47
GOBP_CHEMICAL_HOMEOSTASIS	0.0196796	-0.198838	6.68935	3.77802e-11	2.90535e-10	14.4638
GOBP_UNSATURATED_FATTY_ACID_METABOLIC_PROCESS	0.0481148	-0.162364	6.6889	3.7891e-11	2.91094e-10	14.4609
GOBP_POSITIVE_REGULATION_OF_CYTOPLASMIC_TRANSPORT	0.150323	-0.249403	6.68682	3.84086e-11	2.94774e-10	14.4477
GOBP_REGULATION_OF_RUFFLE_ASSEMBLY	0.0813751	-0.452477	6.68444	3.9011e-11	2.99098e-10	14.4325
GOBP_NEGATIVE_REGULATION_OF_TISSUE_REMODELING	0.0861966	-0.098244	6.67891	4.04456e-11	3.09786e-10	14.3973
GOBP_NEUROBLAST_PROLIFERATION	0.0620044	-0.0992055	6.67019	4.28112e-11	3.27576e-10	14.3418
GOBP_RESPONSE_TO_FIBROBLAST_GROWTH_FACTOR	-0.0548326	-0.111629	-6.66855	4.32705e-11	3.30759e-10	14.3314
GOBP_MICROTUBULE_BASED_MOVEMENT	0.0254198	-0.135468	6.66702	4.37044e-11	3.33743e-10	14.3217
GOBP_RETINA_LAYER_FORMATION	0.0508631	-0.367902	6.66238	4.50437e-11	3.43627e-10	14.2922
GOBP_LIPID_MODIFICATION	0.0331483	-0.191472	6.66221	4.50926e-11	3.43657e-10	14.2911
GOBP_RESPONSE_TO_FUNGUS	-0.0698204	-0.236008	-6.65693	4.66698e-11	3.55323e-10	14.2576
GOBP_NEGATIVE_REGULATION_OF_MAST_CELL_ACTIVATION	0.10844	-0.124476	6.65507	4.72378e-11	3.5929e-10	14.2458
GOBP_NEGATIVE_REGULATION_OF_VASCULAR_ASSOCIATED_SMOOTH_MUSCLE_CELL_MIGRATION	0.190811	-0.231633	6.65408	4.75417e-11	3.61241e-10	14.2395
GOBP_NEGATIVE_REGULATION_OF_GENE_EXPRESSION_EPIGENETIC	0.0447214	-0.277808	6.65061	4.86283e-11	3.69131e-10	14.2175
GOBP_CYTOPLASMIC_TRANSLATIONAL_INITIATION	-0.102127	-0.444042	-6.64899	4.91413e-11	3.72655e-10	14.2073
GOBP_MATURATION_OF_LSU_RRNA_FROM_TRICISTRONIC_RRNA_TRANSCRIPT_SSU_RRNA_5_8S_RRNA_LSU_RRNA	-0.111508	-0.476441	-6.64794	4.94788e-11	3.74842e-10	14.2006
GOBP_NEGATIVE_REGULATION_OF_STEROL_TRANSPORT	-0.119378	0.423913	-6.64538	5.03073e-11	3.80742e-10	14.1844
GOBP_SPERM_CAPACITATION	0.102492	-0.0917077	6.64401	5.07589e-11	3.8378e-10	14.1757
GOBP_TISSUE_REGENERATION	0.0660186	-0.106778	6.63742	5.29766e-11	4.00152e-10	14.1339
GOBP_POSITIVE_REGULATION_OF_HYDROGEN_PEROXIDE_METABOLIC_PROCESS	0.224179	-0.208692	6.63523	5.37332e-11	4.05465e-10	14.1201
GOBP_REGULATION_OF_PEPTIDYL_TYROSINE_PHOSPHORYLATION	0.0280358	-0.194609	6.6323	5.47659e-11	4.12851e-10	14.1015
GOBP_NEGATIVE_REGULATION_OF_INFLAMMATORY_RESPONSE	0.0362538	-0.257279	6.63131	5.51175e-11	4.15092e-10	14.0953
GOBP_REGULATION_OF_AMYLOID_PRECURSOR_PROTEIN_CATABOLIC_PROCESS	0.0665833	-0.322557	6.62635	5.69183e-11	4.28232e-10	14.0639
GOBP_PEPTIDE_TRANSPORT	0.0228885	-0.25662	6.6219	5.85819e-11	4.40315e-10	14.0358
GOBP_ADENYLATE_CYCLASE_INHIBITING_DOPAMINE_RECEPTOR_SIGNALING_PATHWAY	0.128103	-0.430824	6.61969	5.94258e-11	4.46219e-10	14.0219
GOBP_POSITIVE_REGULATION_OF_INTERLEUKIN_6_PRODUCTION	0.0335032	-0.323254	6.61938	5.95435e-11	4.46664e-10	14.02
GOBP_REGULATION_OF_SMOOTH_MUSCLE_CONTRACTION	-0.0510792	0.0444233	-6.61102	6.28536e-11	4.71032e-10	13.9672
GOBP_MICROTUBULE_CYTOSKELETON_ORGANIZATION	0.0222497	-0.221883	6.61045	6.30863e-11	4.72313e-10	13.9636
GOBP_SYNAPSE_ORGANIZATION	0.0222834	-0.152075	6.60504	6.53294e-11	4.88628e-10	13.9295
GOBP_NEGATIVE_REGULATION_OF_KERATINOCYTE_PROLIFERATION	0.090415	-0.305468	6.6024	6.64538e-11	4.96552e-10	13.9129
GOBP_POSITIVE_REGULATION_OF_TUMOR_NECROSIS_FACTOR_MEDIATED_SIGNALING_PATHWAY	0.0666421	-0.652093	6.60176	6.67293e-11	4.98124e-10	13.9088
GOBP_NEURON_PROJECTION_ARBORIZATION	0.0775019	-0.101066	6.59983	6.75663e-11	5.0388e-10	13.8967
GOBP_NEGATIVE_REGULATION_OF_SMAD_PROTEIN_SIGNAL_TRANSDUCTION	0.144374	-0.357819	6.59697	6.88242e-11	5.1276e-10	13.8787
GOBP_REGULATION_OF_CELLULAR_RESPONSE_TO_HYPOXIA	-0.125249	-0.223326	-6.5868	7.34887e-11	5.46979e-10	13.8147
GOBP_MOLTING_CYCLE	0.0386433	-0.166311	6.58455	7.45622e-11	5.54429e-10	13.8006
GOBP_CRD_MEDIATED_MRNA_STABILIZATION	-0.177004	-0.389359	-6.58201	7.57922e-11	5.63027e-10	13.7846
GOBP_CARDIAC_ATRIUM_MORPHOGENESIS	-0.0756829	0.199823	-6.58138	7.61009e-11	5.64448e-10	13.7807
GOBP_VITAMIN_BIOSYNTHETIC_PROCESS	0.052048	-0.0940632	6.58132	7.6131e-11	5.64448e-10	13.7803
GOBP_GLYCOSYLCERAMIDE_BIOSYNTHETIC_PROCESS	0.170448	-0.449589	6.57545	7.90639e-11	5.85624e-10	13.7434
GOBP_POSITIVE_REGULATION_OF_CREB_TRANSCRIPTION_FACTOR_ACTIVITY	0.0953519	0.0845891	6.57346	8.00824e-11	5.92594e-10	13.7309
GOBP_CELL_PROLIFERATION_INVOLVED_IN_METANEPHROS_DEVELOPMENT	-0.130232	0.0657793	-6.57225	8.0706e-11	5.96631e-10	13.7234
GOBP_REGULATION_OF_INCLUSION_BODY_ASSEMBLY	0.0691848	-0.621734	6.56715	8.33959e-11	6.15921e-10	13.6914
GOBP_LIPOSACCHARIDE_METABOLIC_PROCESS	0.036354	-0.268292	6.56699	8.34828e-11	6.15968e-10	13.6904
GOBP_NEGATIVE_REGULATION_OF_PHOSPHOLIPID_METABOLIC_PROCESS	-0.137704	-0.244232	-6.56654	8.37242e-11	6.17153e-10	13.6876
GOBP_CELL_CELL_SIGNALING_BY_WNT	0.0281395	-0.214543	6.55928	8.77241e-11	6.46014e-10	13.6421
GOBP_POSITIVE_REGULATION_OF_LEUKOCYTE_CELL_CELL_ADHESION	0.01997	-0.514911	6.55577	8.97207e-11	6.60082e-10	13.6201
GOBP_PHOSPHATIDYLGLYCEROL_BIOSYNTHETIC_PROCESS	0.108631	-0.451766	6.54427	9.65849e-11	7.09899e-10	13.5482
GOBP_POSITIVE_REGULATION_OF_CELLULAR_COMPONENT_ORGANIZATION	0.0190328	-0.268473	6.54209	9.79445e-11	7.19201e-10	13.5346
GOBP_NEUROTRANSMITTER_TRANSPORT	0.0244632	-0.12848	6.5401	9.92038e-11	7.27749e-10	13.5222
GOBP_PHOSPHOLIPID_EFFLUX	-0.147016	0.0282128	-6.53981	9.93898e-11	7.28414e-10	13.5203
GOBP_NEGATIVE_REGULATION_OF_CELLULAR_MACROMOLECULE_BIOSYNTHETIC_PROCESS	-0.0365953	-0.294809	-6.53479	1.02631e-10	7.51446e-10	13.4891
GOBP_REGULATION_OF_RECEPTOR_MEDIATED_ENDOCYTOSIS	0.0440263	-0.270521	6.53381	1.03281e-10	7.55482e-10	13.4829
GOBP_REGULATION_OF_POLYSACCHARIDE_METABOLIC_PROCESS	0.0657507	-0.124942	6.53099	1.05158e-10	7.68476e-10	13.4653
GOBP_VIRAL_TRANSLATIONAL_TERMINATION_REINITIATION	-0.243745	-0.363477	-6.53076	1.05311e-10	7.68861e-10	13.4639
GOBP_BINDING_OF_SPERM_TO_ZONA_PELLUCIDA	-0.0740173	-0.358126	-6.5261	1.085e-10	7.91391e-10	13.4348
GOBP_GALACTOLIPID_BIOSYNTHETIC_PROCESS	0.237012	-0.40332	6.52463	1.09523e-10	7.98085e-10	13.4257
GOBP_NEGATIVE_REGULATION_OF_PROTEIN_TARGETING_TO_MITOCHONDRION	0.147661	-0.0307391	6.51827	1.14067e-10	8.30411e-10	13.3861
GOBP_COHESIN_LOADING	0.124176	-0.388107	6.51156	1.19058e-10	8.65915e-10	13.3443
GOBP_REGULATION_OF_STEM_CELL_POPULATION_MAINTENANCE	0.0663009	-0.380473	6.51124	1.19299e-10	8.66849e-10	13.3423
GOBP_MEMBRANE_TO_MEMBRANE_DOCKING	0.196176	-0.457445	6.50908	1.20953e-10	8.78026e-10	13.3289
GOBP_NEGATIVE_REGULATION_OF_RESPONSE_TO_DNA_DAMAGE_STIMULUS	0.0320725	-0.38762	6.50674	1.2277e-10	8.90077e-10	13.3144
GOBP_CARDIAC_CHAMBER_DEVELOPMENT	0.0392517	-0.0505849	6.50665	1.22846e-10	8.90077e-10	13.3138
GOBP_MESENCHYMAL_CELL_DIFFERENTIATION	0.0327559	-0.136865	6.50347	1.2536e-10	9.07436e-10	13.294
GOBP_REGULATION_OF_RETROGRADE_TRANSPORT_ENDOSOME_TO_GOLGI	0.135404	-0.348295	6.50024	1.27965e-10	9.25414e-10	13.274
GOBP_SEMI_LUNAR_VALVE_DEVELOPMENT	0.0407205	0.230603	6.49642	1.31116e-10	9.47307e-10	13.2503
GOBP_REGULATION_OF_FATTY_ACID_OXIDATION	0.0711391	-0.047507	6.49586	1.31583e-10	9.49784e-10	13.2468
GOBP_EPITHELIAL_TUBE_FORMATION	0.0352313	-0.235979	6.4951	1.3222e-10	9.53482e-10	13.2421
GOBP_POSITIVE_REGULATION_OF_PROTEIN_LOCALIZATION_TO_EARLY_ENDOSOME	0.157269	-0.0402956	6.49332	1.33728e-10	9.63448e-10	13.2311
GOBP_PRESYNAPTIC_ACTIVE_ZONE_ORGANIZATION	0.211945	-0.255656	6.48782	1.3849e-10	9.96818e-10	13.197
GOBP_PRIMITIVE_HEMOPOIESIS	0.130454	0.107565	6.4863	1.39834e-10	1.00554e-09	13.1876
GOBP_HEAD_DEVELOPMENT	0.0203112	-0.201893	6.48508	1.40927e-10	1.01245e-09	13.18
GOBP_AMYLOID_PRECURSOR_PROTEIN_CATABOLIC_PROCESS	0.0598161	-0.333612	6.48049	1.45102e-10	1.0405e-09	13.1515
GOBP_GLYCOSPHINGOLIPID_BIOSYNTHETIC_PROCESS	0.0653322	-0.0267646	6.48048	1.45104e-10	1.0405e-09	13.1515
GOBP_CARDIAC_MUSCLE_TISSUE_MORPHOGENESIS	0.0631179	0.0543244	6.4793	1.46199e-10	1.04737e-09	13.1442
GOBP_NEGATIVE_REGULATION_OF_TRANSLATIONAL_INITIATION	-0.115553	-0.315167	-6.47895	1.46523e-10	1.04871e-09	13.142
GOBP_MYELOID_LEUKOCYTE_ACTIVATION	0.0268437	-0.249846	6.47625	1.49059e-10	1.06587e-09	13.1253
GOBP_CELL_CELL_RECOGNITION	-0.0634064	-0.320621	-6.47575	1.49529e-10	1.06823e-09	13.1222
GOBP_SIGNAL_TRANSDUCTION_IN_ABSENCE_OF_LIGAND	0.0475952	-0.416321	6.4665	1.58576e-10	1.13179e-09	13.065
GOBP_MUSCLE_ORGAN_MORPHOGENESIS	0.060899	-0.0383415	6.46594	1.59137e-10	1.13474e-09	13.0615
GOBP_MAST_CELL_CYTOKINE_PRODUCTION	0.136825	-0.230011	6.46117	1.64026e-10	1.16851e-09	13.0321
GOBP_REGULATION_OF_RELAXATION_OF_CARDIAC_MUSCLE	0.115712	-0.211066	6.45971	1.65544e-10	1.17823e-09	13.0231
GOBP_PYRIMIDINE_CONTAINING_COMPOUND_TRANSMEMBRANE_TRANSPORT	0.0555525	-0.495959	6.45463	1.70956e-10	1.21562e-09	12.9917
GOBP_REGULATION_OF_PROTEIN_LOCALIZATION_TO_MEMBRANE	0.0426935	-0.284544	6.45431	1.71305e-10	1.21696e-09	12.9897
GOBP_REGULATION_OF_PHOSPHOLIPID_CATABOLIC_PROCESS	-0.165213	0.0507567	-6.4528	1.72946e-10	1.22749e-09	12.9805
GOBP_GLUTAMINE_FAMILY_AMINO_ACID_METABOLIC_PROCESS	0.0415618	-0.300659	6.44915	1.76988e-10	1.255e-09	12.9579
GOBP_SKELETAL_MYOFIBRIL_ASSEMBLY	0.149483	-0.2657	6.44827	1.77976e-10	1.26084e-09	12.9525
GOBP_NITRIC_OXIDE_MEDIATED_SIGNAL_TRANSDUCTION	0.0572079	-0.395403	6.44802	1.78258e-10	1.26167e-09	12.951
GOBP_GASTRIC_MOTILITY	0.294192	-0.0922127	6.4438	1.83082e-10	1.29462e-09	12.925
GOBP_REGULATION_OF_AMYLOID_BETA_CLEARANCE	0.0891616	-0.46204	6.44352	1.83407e-10	1.29572e-09	12.9232
GOBP_MDA_5_SIGNALING_PATHWAY	0.105965	-0.438127	6.44262	1.84452e-10	1.30113e-09	12.9177
GOBP_INTESTINAL_HEXOSE_ABSORPTION	0.24852	-0.151902	6.44257	1.84515e-10	1.30113e-09	12.9174
GOBP_EYE_MORPHOGENESIS	0.0293928	-0.0756865	6.44111	1.86226e-10	1.31199e-09	12.9084
GOBP_LENS_FIBER_CELL_DEVELOPMENT	-0.130497	0.101359	-6.43695	1.91182e-10	1.34567e-09	12.8828
GOBP_REGULATION_OF_T_CELL_MEDIATED_IMMUNITY	0.022889	-0.592686	6.43189	1.97396e-10	1.38812e-09	12.8516
GOBP_RESPONSE_TO_GRANULOCYTE_MACROPHAGE_COLONY_STIMULATING_FACTOR	-0.26646	-0.283381	-6.43148	1.97895e-10	1.39036e-09	12.8492
GOBP_WHITE_FAT_CELL_DIFFERENTIATION	0.116992	-0.365593	6.42962	2.00242e-10	1.40556e-09	12.8377
GOBP_NEGATIVE_REGULATION_OF_CELL_SUBSTRATE_ADHESION	0.0455347	-0.160492	6.42618	2.04635e-10	1.43507e-09	12.8165
GOBP_REGULATION_OF_THYMOCYTE_APOPTOTIC_PROCESS	0.0996727	0.0256466	6.4247	2.0655e-10	1.44717e-09	12.8075
GOBP_POSITIVE_REGULATION_OF_INTERFERON_BETA_PRODUCTION	0.0569339	-0.415626	6.41648	2.17534e-10	1.52274e-09	12.757
GOBP_INTERFERON_BETA_PRODUCTION	0.0450735	-0.385249	6.41483	2.198e-10	1.53719e-09	12.7469
GOBP_NEGATIVE_REGULATION_OF_EPITHELIAL_TO_MESENCHYMAL_TRANSITION	0.0550833	-0.107153	6.4035	2.36042e-10	1.64928e-09	12.6774
GOBP_TUBULIN_COMPLEX_ASSEMBLY	-0.160059	-0.383837	-6.40153	2.38984e-10	1.6683e-09	12.6654
GOBP_REGULATION_OF_TRANSMISSION_OF_NERVE_IMPULSE	0.0948016	0.045466	6.395	2.49003e-10	1.73666e-09	12.6254
GOBP_BODY_MORPHOGENESIS	0.0658838	-0.214586	6.3943	2.5009e-10	1.74265e-09	12.6211
GOBP_REGULATION_OF_LIPID_BIOSYNTHETIC_PROCESS	0.0413902	-0.214585	6.39165	2.54289e-10	1.7703e-09	12.6049
GOBP_NEGATIVE_REGULATION_OF_NEURAL_PRECURSOR_CELL_PROLIFERATION	0.0835511	-0.201189	6.38241	2.69462e-10	1.87422e-09	12.5485
GOBP_ACTIVATION_OF_GTPASE_ACTIVITY	0.0323048	-0.116324	6.37847	2.76207e-10	1.91939e-09	12.5244
GOBP_NEGATIVE_REGULATION_OF_MRNA_METABOLIC_PROCESS	-0.0544672	-0.371784	-6.37188	2.87834e-10	1.99837e-09	12.4842
GOBP_DENDRITE_SELF_AVOIDANCE	0.152954	0.00667729	6.37053	2.90272e-10	2.01346e-09	12.476
GOBP_DENDRITE_MORPHOGENESIS	0.0349743	-0.191498	6.37029	2.90718e-10	2.01473e-09	12.4745
GOBP_CELLULAR_RESPONSE_TO_ORGANIC_CYCLIC_COMPOUND	0.0281817	-0.269436	6.36912	2.9286e-10	2.02774e-09	12.4674
GOBP_RESPONSE_TO_UV_B	0.106257	-0.349499	6.36748	2.95877e-10	2.04677e-09	12.4574
GOBP_OXALATE_TRANSPORT	-0.0167583	0.659249	-6.36431	3.01807e-10	2.08591e-09	12.4381
GOBP_BASIC_AMINO_ACID_TRANSPORT	0.184361	-0.38681	6.35926	3.11474e-10	2.15077e-09	12.4074
GOBP_REGULATION_OF_ESTABLISHMENT_OF_PROTEIN_LOCALIZATION	0.0266698	-0.266189	6.35589	3.18101e-10	2.19455e-09	12.3869
GOBP_PROTEOLYSIS	0.0226289	-0.295554	6.35535	3.19182e-10	2.20002e-09	12.3836
GOBP_EXTRACELLULAR_MATRIX_ASSEMBLY	0.0518667	-0.273005	6.35509	3.19703e-10	2.20163e-09	12.382
GOBP_REGULATION_OF_DNA_DAMAGE_RESPONSE_SIGNAL_TRANSDUCTION_BY_P53_CLASS_MEDIATOR_RESULTING_IN_TRANSCRIPTION_OF_P21_CLASS_MEDIATOR	-0.132658	-0.500723	-6.34524	3.39965e-10	2.33906e-09	12.3221
GOBP_MICROGLIAL_CELL_ACTIVATION	0.0400272	-0.484438	6.34286	3.45064e-10	2.37201e-09	12.3077
GOBP_CARDIAC_CELL_DEVELOPMENT	0.0539283	-0.239692	6.34264	3.45524e-10	2.37303e-09	12.3064
GOBP_EPITHELIAL_CELL_PROLIFERATION	0.0306908	-0.17764	6.33926	3.52876e-10	2.42135e-09	12.2859
GOBP_NEGATIVE_REGULATION_OF_ACTIN_FILAMENT_BUNDLE_ASSEMBLY	0.0693327	-0.232135	6.33621	3.59667e-10	2.46574e-09	12.2673
GOBP_THIOESTER_METABOLIC_PROCESS	0.0536435	-0.227982	6.33574	3.60717e-10	2.47072e-09	12.2645
GOBP_REGULATION_OF_INTRACELLULAR_PROTEIN_TRANSPORT	0.0352819	-0.308325	6.33173	3.69829e-10	2.53086e-09	12.2402
GOBP_NUCLEAR_TRANSCRIBED_MRNA_CATABOLIC_PROCESS_DEADENYLATION_DEPENDENT_DECAY	-0.0603744	-0.357843	-6.3289	3.76395e-10	2.57349e-09	12.223
GOBP_GALACTOSE_CATABOLIC_PROCESS	0.142635	-0.419853	6.32217	3.92508e-10	2.68126e-09	12.1822
GOBP_SPONTANEOUS_NEUROTRANSMITTER_SECRETION	0.0591007	-0.330874	6.32194	3.93052e-10	2.68258e-09	12.1809
GOBP_MAMMARY_GLAND_EPITHELIUM_DEVELOPMENT	0.0427644	-0.220912	6.31779	4.03319e-10	2.7502e-09	12.1558
GOBP_MACROPHAGE_FUSION	0.175506	-0.624277	6.31446	4.11749e-10	2.80518e-09	12.1356
GOBP_REGULATION_OF_T_CELL_ACTIVATION	0.0190077	-0.447027	6.31331	4.14702e-10	2.82278e-09	12.1287
GOBP_INOSITOL_LIPID_MEDIATED_SIGNALING	0.0275321	-0.110696	6.31288	4.15809e-10	2.8278e-09	12.1261
GOBP_REGULATION_OF_PEPTIDE_TRANSPORT	0.0284687	-0.193824	6.3104	4.22279e-10	2.86924e-09	12.1111
GOBP_REGULATION_OF_EXTRACELLULAR_MATRIX_DISASSEMBLY	0.0536372	-0.355438	6.30928	4.25213e-10	2.88661e-09	12.1043
GOBP_REGULATION_OF_VASCULAR_ASSOCIATED_SMOOTH_MUSCLE_CELL_DEDIFFERENTIATION	-0.0209407	0.692745	-6.30646	4.3272e-10	2.93497e-09	12.0873
GOBP_PHOSPHATIDYLSERINE_METABOLIC_PROCESS	0.0783545	-0.439285	6.30492	4.36881e-10	2.96056e-09	12.078
GOBP_CILIUM_MOVEMENT	0.0246026	0.0771849	6.29875	4.53921e-10	3.07331e-09	12.0407
GOBP_REGULATION_OF_LYSOSOMAL_PROTEIN_CATABOLIC_PROCESS	0.111754	-0.376457	6.29366	4.68454e-10	3.1689e-09	12.0101
GOBP_REGULATION_OF_ADIPONECTIN_SECRETION	0.0917818	-0.305576	6.29144	4.74928e-10	3.20986e-09	11.9967
GOBP_MYELOID_DENDRITIC_CELL_DIFFERENTIATION	0.0863321	-0.235821	6.28698	4.88213e-10	3.29673e-09	11.9698
GOBP_CYTOPLASMIC_SEQUESTERING_OF_NF_KAPPAB	-0.124536	-0.311632	-6.28672	4.89014e-10	3.29922e-09	11.9682
GOBP_POSITIVE_REGULATION_OF_SUPRAMOLECULAR_FIBER_ORGANIZATION	0.0314987	-0.378804	6.28631	4.90264e-10	3.30474e-09	11.9658
GOBP_BIOLOGICAL_PROCESS_INVOLVED_IN_INTERSPECIES_INTERACTION_BETWEEN_ORGANISMS	0.0167381	-0.336263	6.28469	4.95196e-10	3.33504e-09	11.956
GOBP_CELL_DIFFERENTIATION_IN_HINDBRAIN	0.0780292	0.126473	6.28046	5.08303e-10	3.4203e-09	11.9306
GOBP_NEGATIVE_REGULATION_OF_INCLUSION_BODY_ASSEMBLY	0.0605558	-0.681585	6.27993	5.09998e-10	3.42869e-09	11.9274
GOBP_NEGATIVE_REGULATION_OF_EXTRINSIC_APOPTOTIC_SIGNALING_PATHWAY	0.0419703	-0.356818	6.27851	5.14478e-10	3.45577e-09	11.9188
GOBP_NEGATIVE_REGULATION_OF_RESPONSE_TO_INTERFERON_GAMMA	0.152471	-0.502636	6.27728	5.18413e-10	3.47915e-09	11.9114
GOBP_POSITIVE_REGULATION_OF_INTRACELLULAR_SIGNAL_TRANSDUCTION	0.0176987	-0.254599	6.27124	5.38102e-10	3.60812e-09	11.8752
GOBP_NEGATIVE_REGULATION_OF_SYSTEMIC_ARTERIAL_BLOOD_PRESSURE	0.0633307	-0.395073	6.26422	5.61934e-10	3.76461e-09	11.833
GOBP_POSITIVE_REGULATION_OF_IMMUNE_SYSTEM_PROCESS	0.0157131	-0.355518	6.25996	5.76889e-10	3.86142e-09	11.8074
GOBP_MATURATION_OF_LSU_RRNA	-0.0927296	-0.409857	-6.25525	5.93879e-10	3.97166e-09	11.7792
GOBP_NEGATIVE_REGULATION_OF_HUMORAL_IMMUNE_RESPONSE_MEDIATED_BY_CIRCULATING_IMMUNOGLOBULIN	0.144467	-0.223463	6.25379	5.99236e-10	4.00399e-09	11.7704
GOBP_SENSORY_PERCEPTION_OF_SOUR_TASTE	-0.0203217	0.88039	-6.25246	6.04147e-10	4.03327e-09	11.7625
GOBP_CYTOPLASMIC_TRANSLATIONAL_ELONGATION	-0.129778	-0.2087	-6.2508	6.10378e-10	4.07132e-09	11.7525
GOBP_NEGATIVE_REGULATION_OF_T_CELL_MIGRATION	-0.0641216	0.337454	-6.2472	6.24052e-10	4.1589e-09	11.731
GOBP_POSITIVE_REGULATION_OF_SODIUM_ION_TRANSPORT	0.0638357	-0.288157	6.24672	6.2587e-10	4.16738e-09	11.7281
GOBP_CALCIUM_DEPENDENT_CELL_CELL_ADHESION_VIA_PLASMA_MEMBRANE_CELL_ADHESION_MOLECULES	0.0507467	0.146166	6.24567	6.29949e-10	4.19089e-09	11.7218
GOBP_SINOATRIAL_NODE_CELL_DEVELOPMENT	-0.0202784	0.815266	-6.24421	6.3561e-10	4.22488e-09	11.7131
GOBP_SYNCYTIUM_FORMATION	0.0542229	-0.420549	6.24164	6.45735e-10	4.28503e-09	11.6977
GOBP_MELANOCYTE_PROLIFERATION	-0.0205491	0.772869	-6.24163	6.45782e-10	4.28503e-09	11.6977
GOBP_PROTEIN_AUTOPHOSPHORYLATION	0.0302413	-0.178363	6.24123	6.4736e-10	4.29178e-09	11.6953
GOBP_CELLULAR_RESPONSE_TO_ESTRADIOL_STIMULUS	0.0501108	-0.0658202	6.23941	6.54666e-10	4.33646e-09	11.6844
GOBP_RESPONSE_TO_PROGESTERONE	-0.0852042	-0.227831	-6.23138	6.8775e-10	4.55165e-09	11.6364
GOBP_ORGANIC_HYDROXY_COMPOUND_BIOSYNTHETIC_PROCESS	0.0302282	-0.183848	6.2266	7.0822e-10	4.68308e-09	11.6079
GOBP_REGULATION_OF_SYSTEMIC_ARTERIAL_BLOOD_PRESSURE_BY_VASOPRESSIN	-0.0202089	0.786286	-6.22542	7.1339e-10	4.71318e-09	11.6008
GOBP_CELL_PROLIFERATION_IN_HINDBRAIN	0.0781407	0.149796	6.224	7.19627e-10	4.75029e-09	11.5923
GOBP_ASTROCYTE_ACTIVATION	0.0436016	-0.412516	6.22369	7.20991e-10	4.75518e-09	11.5905
GOBP_NEGATIVE_REGULATION_OF_SPROUTING_ANGIOGENESIS	0.104498	-0.612701	6.22223	7.27464e-10	4.79374e-09	11.5818
GOBP_REGULATION_OF_GLYCOGEN_METABOLIC_PROCESS	0.0734508	-0.163376	6.21942	7.40098e-10	4.87279e-09	11.565
GOBP_CELL_ACTIVATION_INVOLVED_IN_IMMUNE_RESPONSE	0.0223689	-0.265076	6.21927	7.40797e-10	4.8732e-09	11.5641
GOBP_RIBOSOMAL_SUBUNIT_EXPORT_FROM_NUCLEUS	-0.125866	-0.311113	-6.21515	7.59724e-10	4.99341e-09	11.5396
GOBP_POSITIVE_REGULATION_OF_BASEMENT_MEMBRANE_ASSEMBLY_INVOLVED_IN_EMBRYONIC_BODY_MORPHOGENESIS	0.129981	-0.238029	6.20816	7.92934e-10	5.20721e-09	11.498
GOBP_REGULATION_OF_GROWTH	0.0215884	-0.231704	6.20512	8.07811e-10	5.29766e-09	11.4799
GOBP_NEGATIVE_REGULATION_OF_CELL_POPULATION_PROLIFERATION	0.0185419	-0.276034	6.20501	8.08399e-10	5.29766e-09	11.4792
GOBP_COMMON_MYELOID_PROGENITOR_CELL_PROLIFERATION	-0.124426	0.0345566	-6.20493	8.08788e-10	5.29766e-09	11.4787
GOBP_XENOBIOTIC_GLUCURONIDATION	-0.0202037	0.680057	-6.20433	8.11739e-10	5.31244e-09	11.4752
GOBP_EPITHELIAL_CELL_DIFFERENTIATION_INVOLVED_IN_PROSTATE_GLAND_DEVELOPMENT	0.15045	-0.24814	6.20417	8.12541e-10	5.31314e-09	11.4742
GOBP_REGULATION_OF_HOMOTYPIC_CELL_CELL_ADHESION	0.0431199	-0.443801	6.20337	8.16539e-10	5.33472e-09	11.4694
GOBP_ACUTE_INFLAMMATORY_RESPONSE_TO_ANTIGENIC_STIMULUS	0.0984965	-0.287887	6.19906	8.38317e-10	5.47233e-09	11.4438
GOBP_PROTEIN_PROCESSING	0.036152	-0.282428	6.19703	8.48763e-10	5.53579e-09	11.4318
GOBP_POSITIVE_REGULATION_OF_GROWTH	0.0309883	-0.211119	6.19658	8.51137e-10	5.54654e-09	11.4291
GOBP_POSITIVE_REGULATION_OF_GUANYLATE_CYCLASE_ACTIVITY	-0.020668	0.720045	-6.19378	8.65809e-10	5.63734e-09	11.4124
GOBP_DNA_REPLICATION_CHECKPOINT_SIGNALING	-0.0635266	0.0423112	-6.19077	8.81844e-10	5.73686e-09	11.3946
GOBP_PROTEIN_MONO_ADP_RIBOSYLATION	0.111507	-0.283118	6.19051	8.83255e-10	5.74116e-09	11.393
GOBP_SENSORY_ORGAN_MORPHOGENESIS	0.0229579	-0.0951432	6.18832	8.9512e-10	5.81334e-09	11.3801
GOBP_POSITIVE_REGULATION_OF_POTASSIUM_ION_TRANSMEMBRANE_TRANSPORTER_ACTIVITY	0.136936	-0.231235	6.18628	9.06365e-10	5.88137e-09	11.3679
GOBP_LABYRINTHINE_LAYER_BLOOD_VESSEL_DEVELOPMENT	-0.101658	-0.271386	-6.18434	9.17124e-10	5.94614e-09	11.3564
GOBP_RESPONSE_TO_L_ASCORBIC_ACID	0.241816	-0.410323	6.18328	9.23118e-10	5.97992e-09	11.3501
GOBP_LYTIC_VACUOLE_ORGANIZATION	0.0599778	-0.394301	6.18284	9.25594e-10	5.99089e-09	11.3475
GOBP_POSITIVE_REGULATION_OF_PROTEIN_LOCALIZATION_TO_CELL_PERIPHERY	0.0558115	-0.259468	6.17858	9.49941e-10	6.14328e-09	11.3222
GOBP_POSITIVE_REGULATION_OF_DENDRITIC_CELL_ANTIGEN_PROCESSING_AND_PRESENTATION	0.157131	-0.0470381	6.17502	9.70728e-10	6.2724e-09	11.3012
GOBP_INFLAMMATORY_RESPONSE_TO_WOUNDING	0.109195	-0.350097	6.1734	9.80347e-10	6.3292e-09	11.2916
GOBP_PHOSPHOLIPID_CATABOLIC_PROCESS	-0.0426061	-0.103661	-6.17204	9.8854e-10	6.37671e-09	11.2835
GOBP_NEGATIVE_REGULATION_OF_GLUTAMATE_SECRETION	-0.0199303	0.553672	-6.17069	9.96653e-10	6.42362e-09	11.2756
GOBP_REGULATION_OF_PROTEIN_LOCALIZATION_TO_ENDOSOME	0.113897	0.0431943	6.16799	1.01319e-09	6.52468e-09	11.2596
GOBP_REGULATION_OF_CD4_POSITIVE_ALPHA_BETA_T_CELL_DIFFERENTIATION	0.0355499	-0.415258	6.1666	1.02179e-09	6.57457e-09	11.2513
GOBP_ADRENERGIC_RECEPTOR_SIGNALING_PATHWAY	0.081395	-0.286486	6.16631	1.02361e-09	6.58074e-09	11.2496
GOBP_POSITIVE_REGULATION_OF_MELANOCYTE_DIFFERENTIATION	0.161595	-0.451192	6.16537	1.02945e-09	6.61269e-09	11.2441
GOBP_DETECTION_OF_STIMULUS	0.0224067	-0.258809	6.16061	1.0597e-09	6.8013e-09	11.2159
GOBP_INTERLEUKIN_10_PRODUCTION	0.0345116	-0.40096	6.15828	1.07483e-09	6.89262e-09	11.2021
GOBP_RESPONSE_TO_TYPE_I_INTERFERON	0.0546845	-0.356668	6.15249	1.11327e-09	7.13312e-09	11.168
GOBP_RESPONSE_TO_ISOQUINOLINE_ALKALOID	-0.0560861	-0.408142	-6.14824	1.14235e-09	7.31334e-09	11.1429
GOBP_NEGATIVE_REGULATION_OF_ACTIN_FILAMENT_POLYMERIZATION	0.0550894	-0.374724	6.14801	1.14397e-09	7.31758e-09	11.1415
GOBP_IMMATURE_B_CELL_DIFFERENTIATION	0.10029	-0.0662126	6.14677	1.15256e-09	7.36638e-09	11.1342
GOBP_FLAVONOID_GLUCURONIDATION	-0.0203391	0.680096	-6.1461	1.15726e-09	7.39023e-09	11.1303
GOBP_XENOPHAGY	0.0983809	-0.341206	6.1381	1.21475e-09	7.75088e-09	11.0832
GOBP_POSITIVE_REGULATION_OF_T_HELPER_2_CELL_CYTOKINE_PRODUCTION	0.0829241	0.128411	6.13771	1.21763e-09	7.76277e-09	11.0809
GOBP_CARDIAC_MUSCLE_CELL_DIFFERENTIATION	0.0460957	-0.206121	6.13692	1.22347e-09	7.79348e-09	11.0762
GOBP_UTERUS_MORPHOGENESIS	0.174636	-0.493341	6.13662	1.22575e-09	7.80156e-09	11.0744
GOBP_EPHRIN_RECEPTOR_SIGNALING_PATHWAY	0.0403137	0.0392687	6.13416	1.24412e-09	7.91186e-09	11.0599
GOBP_PHENYLPROPANOID_METABOLIC_PROCESS	-0.0105257	-0.591942	-6.13284	1.2541e-09	7.96867e-09	11.0522
GOBP_POSITIVE_REGULATION_OF_PROTEIN_KINASE_C_SIGNALING	0.111396	0.167839	6.13049	1.27209e-09	8.07627e-09	11.0383
GOBP_NEGATIVE_REGULATION_OF_NEUTROPHIL_ACTIVATION	0.274404	-0.342496	6.12267	1.3337e-09	8.46042e-09	10.9923
GOBP_PROTEIN_FOLDING_IN_ENDOPLASMIC_RETICULUM	0.191792	-0.319507	6.12023	1.3535e-09	8.57893e-09	10.978
GOBP_CELLULAR_RESPONSE_TO_ENDOGENOUS_STIMULUS	0.0224221	-0.236799	6.11928	1.36125e-09	8.62086e-09	10.9725
GOBP_RESPONSE_TO_MANGANESE_ION	0.138967	-0.327361	6.11581	1.39016e-09	8.79665e-09	10.952
GOBP_ORGANIC_ACID_CATABOLIC_PROCESS	0.0424485	-0.291876	6.11561	1.39178e-09	8.79962e-09	10.9509
GOBP_NEGATIVE_REGULATION_OF_CELLULAR_RESPONSE_TO_TRANSFORMING_GROWTH_FACTOR_BETA_STIMULUS	0.399436	-0.523037	6.10968	1.44252e-09	9.1129e-09	10.9161
GOBP_ANTIGEN_PROCESSING_AND_PRESENTATION_OF_ENDOGENOUS_ANTIGEN	0.0249508	-0.817388	6.10857	1.45224e-09	9.16676e-09	10.9096
GOBP_NUCLEOSIDE_BISPHOSPHATE_METABOLIC_PROCESS	0.0410729	-0.227198	6.10518	1.48223e-09	9.34831e-09	10.8897
GOBP_DNA_DAMAGE_RESPONSE_SIGNAL_TRANSDUCTION_BY_P53_CLASS_MEDIATOR_RESULTING_IN_CELL_CYCLE_ARREST	0.0819904	-0.447456	6.10388	1.49389e-09	9.4141e-09	10.8821
GOBP_REGULATION_OF_PROTEIN_TARGETING_TO_MEMBRANE	0.0634736	-0.271528	6.10312	1.50069e-09	9.44914e-09	10.8777
GOBP_REGULATION_OF_NEURON_DIFFERENTIATION	0.0332587	-0.0670562	6.0998	1.53108e-09	9.63256e-09	10.8582
GOBP_CORONARY_ARTERY_MORPHOGENESIS	0.17888	-0.346304	6.09903	1.53814e-09	9.66901e-09	10.8537
GOBP_NEGATIVE_REGULATION_OF_LYMPHOCYTE_ACTIVATION	0.0221576	-0.354151	6.09366	1.58871e-09	9.9739e-09	10.8223
GOBP_KILLING_OF_CELLS_OF_ANOTHER_ORGANISM	-0.106361	-0.405776	-6.09361	1.58925e-09	9.9739e-09	10.8219
GOBP_SPERM_EGG_RECOGNITION	-0.0701677	-0.366343	-6.08963	1.62769e-09	1.02068e-08	10.7987
GOBP_PHOTORECEPTOR_CELL_DIFFERENTIATION	0.0431223	-0.277569	6.08555	1.66814e-09	1.04518e-08	10.7749
GOBP_CORONARY_VASCULATURE_MORPHOGENESIS	0.0986571	-0.088569	6.08333	1.69062e-09	1.05841e-08	10.7618
GOBP_CELLULAR_RESPONSE_TO_HYPEROXIA	-0.288991	-0.280875	-6.08308	1.69316e-09	1.05912e-08	10.7604
GOBP_GALACTOLIPID_METABOLIC_PROCESS	0.186963	-0.3494	6.08129	1.71148e-09	1.06971e-08	10.7499
GOBP_POSITIVE_REGULATION_OF_GASTRULATION	-0.0200769	0.729292	-6.08075	1.71702e-09	1.0723e-08	10.7468
GOBP_FATTY_ACID_BETA_OXIDATION	0.0683279	-0.315571	6.0661	1.87484e-09	1.1699e-08	10.6613
GOBP_REGULATION_OF_NEURON_PROJECTION_REGENERATION	0.0767132	-0.248001	6.06401	1.89847e-09	1.18368e-08	10.6492
GOBP_REGULATION_OF_COAGULATION	0.0594326	0.0255834	6.06263	1.91426e-09	1.19255e-08	10.6411
GOBP_REGENERATION	0.0405066	-0.191927	6.05906	1.95563e-09	1.21733e-08	10.6204
GOBP_CELLULAR_RESPONSE_TO_MAGNESIUM_ION	0.157269	-0.442771	6.05786	1.96972e-09	1.22511e-08	10.6134
GOBP_REGULATION_OF_ACUTE_INFLAMMATORY_RESPONSE	0.0642388	-0.289615	6.05726	1.97676e-09	1.22848e-08	10.6099
GOBP_OSTEOBLAST_DEVELOPMENT	-0.0433837	0.340721	-6.05711	1.97853e-09	1.22858e-08	10.609
GOBP_CELL_DIFFERENTIATION_INVOLVED_IN_PHENOTYPIC_SWITCHING	0.350154	-0.275351	6.05528	2.00043e-09	1.24118e-08	10.5984
GOBP_ECTODERM_DEVELOPMENT	-0.0886329	-0.250043	-6.04777	2.09228e-09	1.29711e-08	10.5547
GOBP_POSITIVE_REGULATION_OF_MIRNA_TRANSCRIPTION	-0.0736423	-0.208413	-6.04548	2.12118e-09	1.31396e-08	10.5414
GOBP_REGULATION_OF_ACTOMYOSIN_STRUCTURE_ORGANIZATION	0.0452895	-0.278452	6.04531	2.12332e-09	1.31398e-08	10.5404
GOBP_LIPID_HOMEOSTASIS	0.0354746	-0.255817	6.04511	2.12583e-09	1.31398e-08	10.5393
GOBP_POSITIVE_REGULATION_OF_INTRINSIC_APOPTOTIC_SIGNALING_PATHWAY_BY_P53_CLASS_MEDIATOR	-0.109871	-0.59914	-6.04507	2.12636e-09	1.31398e-08	10.539
GOBP_REGULATION_OF_SODIUM_ION_TRANSMEMBRANE_TRANSPORT	0.0431948	-0.185133	6.03178	2.30195e-09	1.42134e-08	10.462
GOBP_PEPTIDYL_TYROSINE_MODIFICATION	0.0219459	-0.189434	6.03152	2.3056e-09	1.42244e-08	10.4604
GOBP_POSITIVE_REGULATION_OF_TUMOR_NECROSIS_FACTOR_SUPERFAMILY_CYTOKINE_PRODUCTION	0.0348648	-0.322334	6.02446	2.40472e-09	1.48239e-08	10.4195
GOBP_HISTONE_SERINE_PHOSPHORYLATION	0.0830244	-0.0568578	6.0215	2.44751e-09	1.50756e-08	10.4024
GOBP_CELLULAR_RESPONSE_TO_SODIUM_ARSENITE	-0.0674968	-0.620781	-6.0173	2.50951e-09	1.5445e-08	10.3781
GOBP_PEPTIDE_MODIFICATION	0.188206	-0.456503	6.01665	2.51921e-09	1.54922e-08	10.3744
GOBP_REGULATION_OF_REACTIVE_OXYGEN_SPECIES_BIOSYNTHETIC_PROCESS	0.0688108	-0.277294	6.01033	2.6158e-09	1.60733e-08	10.3378
GOBP_LEUKOTRIENE_METABOLIC_PROCESS	0.0512832	0.0396155	6.00873	2.64081e-09	1.62139e-08	10.3286
GOBP_POSITIVE_REGULATION_OF_EPITHELIAL_CELL_PROLIFERATION	0.0354726	-0.129286	6.00763	2.65807e-09	1.63068e-08	10.3222
GOBP_FEMALE_MEIOSIS_I	-0.0804093	0.169315	-6.00469	2.70491e-09	1.65808e-08	10.3053
GOBP_LACTATE_METABOLIC_PROCESS	-0.109647	-0.415598	-6.00153	2.75618e-09	1.68816e-08	10.287
GOBP_CATION_TRANSMEMBRANE_TRANSPORT	0.0193494	-0.141496	5.99835	2.80873e-09	1.71897e-08	10.2687
GOBP_INSULIN_LIKE_GROWTH_FACTOR_RECEPTOR_SIGNALING_PATHWAY	0.0708092	-0.175078	5.99554	2.85597e-09	1.74648e-08	10.2525
GOBP_POSITIVE_REGULATION_OF_CELLULAR_COMPONENT_BIOGENESIS	0.0204052	-0.259989	5.99088	2.93605e-09	1.79402e-08	10.2257
GOBP_REPRODUCTIVE_SYSTEM_DEVELOPMENT	0.0287688	-0.178494	5.98666	3.01038e-09	1.83797e-08	10.2014
GOBP_REGULATION_OF_TRANSLATIONAL_FIDELITY	-0.0470298	-0.618771	-5.98476	3.04455e-09	1.85735e-08	10.1904
GOBP_RRNA_TRANSPORT	-0.198171	-0.363245	-5.98257	3.0842e-09	1.88003e-08	10.1779
GOBP_DETERMINATION_OF_LIVER_LEFT_RIGHT_ASYMMETRY	0.123535	-0.269559	5.98044	3.12341e-09	1.90242e-08	10.1656
GOBP_REGULATION_OF_CELLULAR_COMPONENT_BIOGENESIS	0.0183167	-0.271848	5.97907	3.1489e-09	1.91642e-08	10.1577
GOBP_REGULATION_OF_LEUKOCYTE_MEDIATED_CYTOTOXICITY	0.0178415	-0.598685	5.97873	3.15518e-09	1.91871e-08	10.1558
GOBP_SPLICEOSOMAL_SNRNP_ASSEMBLY	-0.0500232	-0.537797	-5.97539	3.21822e-09	1.95549e-08	10.1365
GOBP_REGULATION_OF_NATURAL_KILLER_CELL_CHEMOTAXIS	-0.0560978	-0.503516	-5.97329	3.2583e-09	1.97827e-08	10.1245
GOBP_REGULATION_OF_HEART_MORPHOGENESIS	-0.0285916	0.580478	-5.97131	3.29668e-09	1.99909e-08	10.1132
GOBP_LEUKOCYTE_AGGREGATION	-0.10761	-0.253161	-5.97117	3.29955e-09	1.99909e-08	10.1123
GOBP_ADENYLATE_CYCLASE_INHIBITING_G_PROTEIN_COUPLED_GLUTAMATE_RECEPTOR_SIGNALING_PATHWAY	-0.0198181	0.678296	-5.97112	3.30044e-09	1.99909e-08	10.1121
GOBP_DIADENOSINE_POLYPHOSPHATE_CATABOLIC_PROCESS	0.147888	-0.568022	5.97042	3.31411e-09	2.0042e-08	10.108
GOBP_DIADENOSINE_POLYPHOSPHATE_METABOLIC_PROCESS	0.147888	-0.568022	5.97042	3.31411e-09	2.0042e-08	10.108
GOBP_REGULATION_OF_MELANOCYTE_DIFFERENTIATION	0.152844	-0.427237	5.97017	3.319e-09	2.00557e-08	10.1066
GOBP_PROTEIN_LOCALIZATION_TO_MICROTUBULE_ORGANIZING_CENTER	0.06268	-0.293445	5.96311	3.46052e-09	2.08943e-08	10.0661
GOBP_ADENYLATE_CYCLASE_ACTIVATING_ADRENERGIC_RECEPTOR_SIGNALING_PATHWAY	0.0870062	-0.260692	5.96214	3.48038e-09	2.09976e-08	10.0605
GOBP_POSITIVE_REGULATION_OF_EPITHELIAL_TUBE_FORMATION	-0.0189174	0.611625	-5.96139	3.49583e-09	2.10742e-08	10.0562
GOBP_NEGATIVE_REGULATION_OF_ION_TRANSMEMBRANE_TRANSPORTER_ACTIVITY	-0.0524337	-0.106056	-5.95922	3.5408e-09	2.13285e-08	10.0438
GOBP_NEGATIVE_REGULATION_OF_TELOMERE_CAPPING	0.125332	-0.442362	5.95886	3.54843e-09	2.13576e-08	10.0417
GOBP_GLYCOSYLCERAMIDE_METABOLIC_PROCESS	0.0929737	-0.34659	5.95786	3.56948e-09	2.14674e-08	10.036
GOBP_CANONICAL_WNT_SIGNALING_PATHWAY	0.0295352	-0.182848	5.95588	3.6113e-09	2.17019e-08	10.0247
GOBP_NEGATIVE_REGULATION_OF_TRANSFERASE_ACTIVITY	-0.0258979	-0.267809	-5.95435	3.64418e-09	2.18823e-08	10.0159
GOBP_POSITIVE_REGULATION_OF_CELL_POPULATION_PROLIFERATION	0.0180118	-0.250925	5.95272	3.6793e-09	2.20758e-08	10.0066
GOBP_PROTEIN_LOCALIZATION_TO_EARLY_ENDOSOME	0.119548	-0.148061	5.95147	3.70652e-09	2.22217e-08	9.9994
GOBP_REGULATION_OF_DIGESTIVE_SYSTEM_PROCESS	0.0532109	-0.092131	5.94919	3.75672e-09	2.24908e-08	9.98634
GOBP_NITROGEN_COMPOUND_TRANSPORT	0.0212377	-0.293457	5.94916	3.7573e-09	2.24908e-08	9.98619
GOBP_BRAIN_MORPHOGENESIS	0.0457035	-0.221414	5.94733	3.79804e-09	2.27169e-08	9.97572
GOBP_MACROPHAGE_DIFFERENTIATION	0.0497814	-0.22888	5.94685	3.80884e-09	2.27637e-08	9.97297
GOBP_SPERM_MITOCHONDRIAL_SHEATH_ASSEMBLY	-0.0197382	0.5988	-5.94227	3.91287e-09	2.33672e-08	9.94681
GOBP_REGULATION_OF_PLASMINOGEN_ACTIVATION	0.117678	-0.476596	5.94212	3.91631e-09	2.33695e-08	9.94596
GOBP_NEGATIVE_REGULATION_OF_VASCULAR_WOUND_HEALING	0.0470298	-0.620175	5.93625	4.05403e-09	2.41724e-08	9.91241
GOBP_NEGATIVE_REGULATION_OF_HEPATOCYTE_APOPTOTIC_PROCESS	0.153103	-0.510949	5.93542	4.07396e-09	2.42534e-08	9.90765
GOBP_REGULATION_OF_HEPATOCYTE_APOPTOTIC_PROCESS	0.153103	-0.510949	5.93542	4.07396e-09	2.42534e-08	9.90765
GOBP_NEGATIVE_REGULATION_OF_HIPPO_SIGNALING	0.0686551	-0.288669	5.93424	4.10242e-09	2.44038e-08	9.90089
GOBP_SPHINGOID_METABOLIC_PROCESS	0.0771753	-0.300882	5.93373	4.11459e-09	2.44572e-08	9.89802
GOBP_CALCIUM_ION_TRANSPORT	-0.0199338	-0.158176	-5.92754	4.26717e-09	2.53444e-08	9.86268
GOBP_LUNG_VASCULATURE_DEVELOPMENT	0.427378	-0.118947	5.92608	4.30376e-09	2.55419e-08	9.85439
GOBP_NEGATIVE_REGULATION_OF_NEURON_APOPTOTIC_PROCESS	0.0395302	-0.24136	5.92056	4.44566e-09	2.63635e-08	9.82291
GOBP_REGULATION_OF_LYSOSOME_ORGANIZATION	0.14632	-0.530399	5.91894	4.48812e-09	2.65947e-08	9.81368
GOBP_LUNG_MORPHOGENESIS	0.0506401	-0.279822	5.9163	4.55814e-09	2.69887e-08	9.79866
GOBP_MAMMARY_GLAND_DEVELOPMENT	0.0330886	-0.127863	5.91172	4.6821e-09	2.76976e-08	9.77262
GOBP_CAMP_METABOLIC_PROCESS	0.02311	0.214916	5.91161	4.68511e-09	2.76976e-08	9.772
GOBP_AMYLOID_PRECURSOR_PROTEIN_METABOLIC_PROCESS	0.0476556	-0.311029	5.90859	4.76879e-09	2.81705e-08	9.75482
GOBP_MITOTIC_SISTER_CHROMATID_COHESION	0.0694152	-0.361498	5.90629	4.83347e-09	2.85305e-08	9.74174
GOBP_VENTRICULAR_CARDIAC_MUSCLE_TISSUE_DEVELOPMENT	0.0708376	-0.11477	5.90042	5.00243e-09	2.95051e-08	9.7084
GOBP_REGULATION_OF_NEUTROPHIL_ACTIVATION	0.0560286	-0.396962	5.89775	5.08128e-09	2.99471e-08	9.69323
GOBP_POSITIVE_REGULATION_OF_EARLY_ENDOSOME_TO_LATE_ENDOSOME_TRANSPORT	0.163026	-0.287716	5.89746	5.09002e-09	2.99754e-08	9.69156
GOBP_REGULATION_OF_ORGANELLE_ASSEMBLY	0.0295038	-0.367143	5.89345	5.21053e-09	3.06615e-08	9.66886
GOBP_POSITIVE_REGULATION_OF_UNSATURATED_FATTY_ACID_BIOSYNTHETIC_PROCESS	0.179209	-0.094957	5.88932	5.33785e-09	3.13865e-08	9.64543
GOBP_NEGATIVE_REGULATION_OF_OSTEOCLAST_DEVELOPMENT	0.0367443	-0.663084	5.88463	5.48601e-09	3.2233e-08	9.61887
GOBP_NEGATIVE_REGULATION_OF_CELL_MORPHOGENESIS_INVOLVED_IN_DIFFERENTIATION	0.0819933	-0.38154	5.88417	5.50075e-09	3.22948e-08	9.61626
GOBP_POSITIVE_REGULATION_OF_TYPE_I_INTERFERON_MEDIATED_SIGNALING_PATHWAY	0.0661036	-0.355154	5.88401	5.50603e-09	3.23009e-08	9.61533
GOBP_REGULATION_OF_HYDROGEN_PEROXIDE_BIOSYNTHETIC_PROCESS	0.123068	-0.474726	5.88386	5.5109e-09	3.23047e-08	9.61448
GOBP_INTERCELLULAR_TRANSPORT	-0.0320217	0.522891	-5.88269	5.54864e-09	3.2501e-08	9.60785
GOBP_INSULIN_SECRETION_INVOLVED_IN_CELLULAR_RESPONSE_TO_GLUCOSE_STIMULUS	0.053209	-0.226544	5.88216	5.56584e-09	3.25768e-08	9.60485
GOBP_PROGESTERONE_BIOSYNTHETIC_PROCESS	-0.239938	-0.0586176	-5.88157	5.58495e-09	3.26612e-08	9.60153
GOBP_CELLULAR_RESPONSE_TO_NITROGEN_COMPOUND	0.0237808	-0.24615	5.88145	5.58881e-09	3.26612e-08	9.60086
GOBP_POSITIVE_REGULATION_OF_AUTOPHAGY_OF_MITOCHONDRION	-0.167067	-0.337455	-5.87791	5.70549e-09	3.33176e-08	9.58081
GOBP_REGULATION_OF_NUCLEOTIDE_BINDING_OLIGOMERIZATION_DOMAIN_CONTAINING_2_SIGNALING_PATHWAY	0.0443206	-0.671134	5.87739	5.72272e-09	3.33875e-08	9.57788
GOBP_RESPONSE_TO_SYMBIONT	0.187183	-0.264004	5.87729	5.72619e-09	3.33875e-08	9.5773
GOBP_VIRAL_TRANSLATION	-0.124862	-0.385701	-5.87547	5.78724e-09	3.37178e-08	9.56701
GOBP_NEGATIVE_REGULATION_OF_RUFFLE_ASSEMBLY	0.121408	-0.485365	5.8744	5.82366e-09	3.39041e-08	9.56092
GOBP_PERIPHERAL_NERVOUS_SYSTEM_AXON_REGENERATION	0.178488	-0.18306	5.87314	5.86643e-09	3.41271e-08	9.55382
GOBP_NEGATIVE_REGULATION_OF_SUPRAMOLECULAR_FIBER_ORGANIZATION	0.0327068	-0.288484	5.87107	5.93748e-09	3.45141e-08	9.54215
GOBP_PHOTORECEPTOR_CELL_OUTER_SEGMENT_ORGANIZATION	0.0710119	-0.0943795	5.86617	6.10951e-09	3.54871e-08	9.51444
GOBP_REGULATION_OF_PROTEIN_MATURATION	0.0594462	-0.327982	5.85949	6.35166e-09	3.68657e-08	9.47673
GOBP_RENAL_WATER_HOMEOSTASIS	0.0835284	0.0444675	5.85562	6.49614e-09	3.76756e-08	9.45492
GOBP_METHYLGUANOSINE_CAP_DECAPPING	-0.101727	-0.130485	-5.8516	6.64979e-09	3.85375e-08	9.43224
GOBP_FATTY_ACID_DERIVATIVE_BIOSYNTHETIC_PROCESS	0.0468444	-0.059563	5.85098	6.67367e-09	3.86466e-08	9.42877
GOBP_CEREBRAL_CORTEX_TANGENTIAL_MIGRATION	-0.0195599	0.645015	-5.85059	6.68867e-09	3.87041e-08	9.42659
GOBP_NEGATIVE_REGULATION_OF_PROTEIN_MODIFICATION_BY_SMALL_PROTEIN_CONJUGATION_OR_REMOVAL	-0.0374967	-0.36949	-5.84813	6.78487e-09	3.92286e-08	9.41274
GOBP_MAINTENANCE_OF_CENTROSOME_LOCATION	0.156401	-0.267083	5.84792	6.79333e-09	3.92286e-08	9.41153
GOBP_CALCIUM_MEDIATED_SIGNALING_USING_INTRACELLULAR_CALCIUM_SOURCE	0.0638913	-0.0528931	5.84789	6.7947e-09	3.92286e-08	9.41133
GOBP_MODULATION_BY_HOST_OF_VIRAL_GENOME_REPLICATION	0.11262	-0.282464	5.84761	6.80555e-09	3.92616e-08	9.40979
GOBP_GANGLIOSIDE_METABOLIC_PROCESS	0.0308778	-0.438655	5.84532	6.89671e-09	3.97575e-08	9.39688
GOBP_SKIN_MORPHOGENESIS	0.109469	-0.0531396	5.84453	6.92832e-09	3.99096e-08	9.39245
GOBP_VASOCONSTRICTION	-0.0457219	0.0275358	-5.84387	6.95491e-09	4.00254e-08	9.38873
GOBP_FRUCTOSE_TRANSMEMBRANE_TRANSPORT	0.123953	-0.370042	5.84377	6.95889e-09	4.00254e-08	9.38818
GOBP_REGULATION_OF_GOLGI_ORGANIZATION	0.0849779	-0.371194	5.84149	7.05143e-09	4.05271e-08	9.37536
GOBP_NEGATIVE_REGULATION_OF_TRANSMEMBRANE_RECEPTOR_PROTEIN_SERINE_THREONINE_KINASE_SIGNALING_PATHWAY	0.0335267	-0.196655	5.84122	7.06282e-09	4.05622e-08	9.3738
GOBP_SODIUM_INDEPENDENT_ORGANIC_ANION_TRANSPORT	0.0878015	-0.0530155	5.8394	7.13765e-09	4.09611e-08	9.36358
GOBP_REGULATION_OF_MYOBLAST_FUSION	0.0517652	-0.551883	5.83864	7.16925e-09	4.11116e-08	9.35929
GOBP_REGULATION_OF_PODOSOME_ASSEMBLY	0.0829079	-0.459572	5.83776	7.20588e-09	4.12906e-08	9.35435
GOBP_PEPTIDYL_AMINO_ACID_MODIFICATION	0.0164086	-0.246987	5.83718	7.23005e-09	4.13981e-08	9.3511
GOBP_REGULATION_OF_EXTENT_OF_CELL_GROWTH	0.0363584	-0.109589	5.83253	7.42762e-09	4.24975e-08	9.32496
GOBP_POSITIVE_REGULATION_OF_PROTEIN_EXIT_FROM_ENDOPLASMIC_RETICULUM	0.10809	-0.399054	5.83176	7.46057e-09	4.26541e-08	9.32067
GOBP_CORTICAL_ACTIN_CYTOSKELETON_ORGANIZATION	0.0645448	-0.29037	5.82632	7.69925e-09	4.39859e-08	9.29013
GOBP_POSITIVE_REGULATION_OF_PROTEIN_MODIFICATION_PROCESS	0.0175204	-0.258631	5.82062	7.95733e-09	4.54174e-08	9.25816
GOBP_NEGATIVE_REGULATION_OF_SMALL_GTPASE_MEDIATED_SIGNAL_TRANSDUCTION	0.0424493	-0.159769	5.82052	7.96196e-09	4.54174e-08	9.25759
GOBP_STRESS_ACTIVATED_PROTEIN_KINASE_SIGNALING_CASCADE	0.0286346	-0.25541	5.8204	7.96765e-09	4.54174e-08	9.2569
GOBP_REGULATION_OF_NEUROBLAST_PROLIFERATION	0.0699822	-0.0327118	5.8186	8.05112e-09	4.5859e-08	9.24679
GOBP_REGULATION_OF_RESPONSE_TO_EXTRACELLULAR_STIMULUS	-0.0724598	-0.15344	-5.81787	8.08505e-09	4.6018e-08	9.24272
GOBP_POSITIVE_REGULATION_OF_CILIUM_MOVEMENT	0.190109	-0.0273663	5.81471	8.23405e-09	4.68312e-08	9.22501
GOBP_RUFFLE_ORGANIZATION	0.048501	-0.401974	5.81091	8.41655e-09	4.78335e-08	9.20375
GOBP_NIK_NF_KAPPAB_SIGNALING	0.0368166	-0.30678	5.81071	8.42632e-09	4.78535e-08	9.20263
GOBP_SKIN_EPIDERMIS_DEVELOPMENT	0.0363783	-0.186384	5.80877	8.52137e-09	4.83573e-08	9.19175
GOBP_POSITIVE_REGULATION_OF_PROSTAGLANDIN_BIOSYNTHETIC_PROCESS	0.230609	-0.263724	5.80661	8.62797e-09	4.8926e-08	9.1797
GOBP_RESPONSE_TO_OXYGEN_CONTAINING_COMPOUND	0.0184941	-0.212419	5.80528	8.69466e-09	4.92676e-08	9.17223
GOBP_LOBAR_BRONCHUS_DEVELOPMENT	-0.0312437	0.696379	-5.80375	8.77146e-09	4.9666e-08	9.16371
GOBP_REGULATION_OF_CELL_KILLING	0.0180402	-0.561195	5.80314	8.80245e-09	4.98045e-08	9.16029
GOBP_REGULATION_OF_PROTEIN_DEACETYLATION	0.0498719	-0.360836	5.80221	8.85006e-09	5.00369e-08	9.15506
GOBP_POSITIVE_REGULATION_OF_DNA_LIGATION	-0.234081	-0.191092	-5.79983	8.97232e-09	5.06906e-08	9.14176
GOBP_FLAVONE_METABOLIC_PROCESS	-0.0203852	0.509562	-5.79498	9.22647e-09	5.2088e-08	9.11468
GOBP_REGULATION_OF_MAINTENANCE_OF_SISTER_CHROMATID_COHESION	0.127587	-0.439116	5.79479	9.23622e-09	5.21046e-08	9.11365
GOBP_POSITIVE_REGULATION_OF_B_CELL_RECEPTOR_SIGNALING_PATHWAY	0.0993291	-0.149638	5.78948	9.52304e-09	5.3683e-08	9.08401
GOBP_RESPONSE_TO_ENDOPLASMIC_RETICULUM_STRESS	0.0390447	-0.381991	5.78906	9.54612e-09	5.37475e-08	9.08166
GOBP_POSITIVE_REGULATION_OF_CIRCADIAN_RHYTHM	0.109412	-0.288907	5.78902	9.54854e-09	5.37475e-08	9.08142
GOBP_REGULATION_OF_SYNAPTIC_VESICLE_TRANSPORT	0.117583	-0.284229	5.7884	9.58251e-09	5.3899e-08	9.07797
GOBP_NEGATIVE_REGULATION_OF_SYNAPTIC_TRANSMISSION_GABAERGIC	-0.0448467	0.282736	-5.78702	9.65892e-09	5.42888e-08	9.07027
GOBP_MALE_GAMETE_GENERATION	0.0150949	-0.193442	5.7859	9.7213e-09	5.45386e-08	9.06403
GOBP_IMMUNE_RESPONSE_REGULATING_SIGNALING_PATHWAY	0.0142973	-0.336401	5.78585	9.72399e-09	5.45386e-08	9.06377
GOBP_CEREBRAL_CORTEX_DEVELOPMENT	0.0383783	-0.301242	5.78584	9.72477e-09	5.45386e-08	9.06369
GOBP_FAT_SOLUBLE_VITAMIN_METABOLIC_PROCESS	0.0394253	0.0510753	5.78202	9.94045e-09	5.57073e-08	9.04242
GOBP_LIPID_DIGESTION	0.0775458	-0.0669606	5.78038	1.00346e-08	5.61935e-08	9.03329
GOBP_PROTEIN_LOCALIZATION_TO_AXON	0.126766	-0.0719308	5.77739	1.02083e-08	5.71249e-08	9.01665
GOBP_POSITIVE_REGULATION_OF_T_CELL_MEDIATED_IMMUNE_RESPONSE_TO_TUMOR_CELL	0.0969731	-0.692035	5.77622	1.02772e-08	5.74682e-08	9.01013
GOBP_REGULATION_OF_GAP_JUNCTION_ASSEMBLY	-0.187533	-0.265887	-5.77311	1.04624e-08	5.84611e-08	8.99282
GOBP_REGULATION_OF_SKELETAL_MUSCLE_CELL_DIFFERENTIATION	0.138296	-0.17043	5.76765	1.07955e-08	6.0278e-08	8.96244
GOBP_ZYMOGEN_ACTIVATION	0.053095	-0.287995	5.76425	1.10078e-08	6.14187e-08	8.94357
GOBP_POSITIVE_REGULATION_OF_NF_KAPPAB_TRANSCRIPTION_FACTOR_ACTIVITY	0.0227529	-0.339422	5.76117	1.12039e-08	6.2467e-08	8.92646
GOBP_3_UTR_MEDIATED_MRNA_STABILIZATION	-0.113683	-0.139806	-5.75908	1.13389e-08	6.31741e-08	8.91484
GOBP_NUCLEAR_TRANSCRIBED_MRNA_CATABOLIC_PROCESS	-0.0436802	-0.391709	-5.75808	1.1404e-08	6.34902e-08	8.9093
GOBP_LOBAR_BRONCHUS_EPITHELIUM_DEVELOPMENT	-0.038397	0.784338	-5.75505	1.16036e-08	6.45548e-08	8.89248
GOBP_TRIVALENT_INORGANIC_ANION_HOMEOSTASIS	0.0623785	-0.106427	5.75395	1.16768e-08	6.49145e-08	8.88639
GOBP_NEGATIVE_REGULATION_OF_SISTER_CHROMATID_COHESION	0.142321	-0.497354	5.74817	1.20697e-08	6.705e-08	8.85432
GOBP_POSITIVE_REGULATION_OF_MONOCYTE_CHEMOTAXIS	-0.0540863	-0.474373	-5.74545	1.22591e-08	6.80529e-08	8.83923
GOBP_PROTEIN_LOCALIZATION_TO_MICROTUBULE_END	-0.0868363	0.132162	-5.74412	1.2352e-08	6.85188e-08	8.83191
GOBP_NEGATIVE_REGULATION_OF_POTASSIUM_ION_TRANSPORT	-0.0740912	0.10655	-5.74149	1.25396e-08	6.95088e-08	8.81731
GOBP_FOREBRAIN_NEURON_FATE_COMMITMENT	-0.0211759	0.594195	-5.7387	1.27405e-08	7.05712e-08	8.80191
GOBP_EPITHELIAL_TO_MESENCHYMAL_TRANSITION	0.032284	-0.143497	5.73796	1.27951e-08	7.08222e-08	8.79777
GOBP_VITAMIN_D3_METABOLIC_PROCESS	-0.0349429	0.728258	-5.73667	1.28892e-08	7.12918e-08	8.79066
GOBP_NEGATIVE_REGULATION_OF_DNA_DAMAGE_RESPONSE_SIGNAL_TRANSDUCTION_BY_P53_CLASS_MEDIATOR	0.0965817	-0.361867	5.72603	1.36957e-08	7.56976e-08	8.73186
GOBP_BIOLOGICAL_PROCESS_INVOLVED_IN_INTERACTION_WITH_HOST	0.031946	-0.384136	5.72526	1.37558e-08	7.59282e-08	8.72762
GOBP_SIGNAL_TRANSDUCTION_BY_P53_CLASS_MEDIATOR	-0.0306984	-0.347099	-5.72524	1.37573e-08	7.59282e-08	8.72752
GOBP_PYRIMIDINE_NUCLEOSIDE_MONOPHOSPHATE_CATABOLIC_PROCESS	0.128743	-0.288912	5.7245	1.38154e-08	7.61942e-08	8.72343
GOBP_NEGATIVE_REGULATION_OF_INNATE_IMMUNE_RESPONSE	0.0276767	-0.557095	5.72194	1.40187e-08	7.72598e-08	8.70927
GOBP_DEOXYRIBONUCLEOSIDE_MONOPHOSPHATE_CATABOLIC_PROCESS	0.102958	-0.19598	5.71506	1.45781e-08	8.02843e-08	8.67137
GOBP_REGULATION_OF_LEUKOCYTE_ADHESION_TO_ARTERIAL_ENDOTHELIAL_CELL	0.0540775	-0.639458	5.71457	1.46193e-08	8.04537e-08	8.66864
GOBP_REGULATION_OF_CANONICAL_WNT_SIGNALING_PATHWAY	0.0313515	-0.194826	5.71415	1.46544e-08	8.05888e-08	8.66631
GOBP_T_CELL_MEDIATED_CYTOTOXICITY	0.0189642	-0.687993	5.71378	1.4685e-08	8.06988e-08	8.66429
GOBP_GLIOGENESIS	0.0279295	-0.246745	5.70645	1.53094e-08	8.40699e-08	8.62396
GOBP_REGULATION_OF_AXON_GUIDANCE	0.128267	-0.177958	5.702	1.57016e-08	8.61617e-08	8.59945
GOBP_CYTOKINE_PRODUCTION_INVOLVED_IN_IMMUNE_RESPONSE	0.0213601	-0.448541	5.70161	1.57361e-08	8.6289e-08	8.59733
GOBP_G_PROTEIN_COUPLED_GLUTAMATE_RECEPTOR_SIGNALING_PATHWAY	-0.018442	0.260487	-5.7009	1.58004e-08	8.65795e-08	8.59338
GOBP_VITAMIN_METABOLIC_PROCESS	0.0403481	-0.175841	5.70039	1.58455e-08	8.67642e-08	8.59062
GOBP_REGULATION_OF_CELL_DEVELOPMENT	0.0211477	-0.164205	5.69852	1.60149e-08	8.76289e-08	8.58032
GOBP_NEGATIVE_REGULATION_OF_GONADOTROPIN_SECRETION	-0.0195943	0.530475	-5.69834	1.60316e-08	8.76577e-08	8.57931
GOBP_NEGATIVE_REGULATION_OF_ENDOCYTOSIS	-0.0613608	-0.160897	-5.69777	1.60835e-08	8.78786e-08	8.57618
GOBP_POSITIVE_REGULATION_OF_NUCLEOTIDE_BIOSYNTHETIC_PROCESS	-0.083914	-0.123558	-5.69702	1.61516e-08	8.81877e-08	8.57209
GOBP_SMOOTH_MUSCLE_CONTRACTION	-0.0331526	-0.0679767	-5.69469	1.63665e-08	8.92973e-08	8.55928
GOBP_TACHYKININ_RECEPTOR_SIGNALING_PATHWAY	-0.0198426	0.605445	-5.69197	1.66214e-08	9.06235e-08	8.54431
GOBP_PARACRINE_SIGNALING	-0.0217251	0.503508	-5.69096	1.67169e-08	9.10789e-08	8.53877
GOBP_REGULATION_OF_TRANSLATION_AT_SYNAPSE_MODULATING_SYNAPTIC_TRANSMISSION	-0.114225	-0.61761	-5.68831	1.69696e-08	9.23903e-08	8.52423
GOBP_DEVELOPMENTAL_CELL_GROWTH	0.0300838	-0.199768	5.68756	1.70417e-08	9.27166e-08	8.52013
GOBP_SEMICIRCULAR_CANAL_DEVELOPMENT	-0.020323	0.690341	-5.68611	1.7182e-08	9.34131e-08	8.51219
GOBP_POSITIVE_REGULATION_OF_MITOCHONDRION_ORGANIZATION	-0.0522802	-0.273842	-5.68284	1.75037e-08	9.50949e-08	8.49422
GOBP_REGULATION_OF_EPITHELIAL_CELL_DIFFERENTIATION	0.0431791	-0.0961072	5.67754	1.80361e-08	9.79178e-08	8.46521
GOBP_EARLY_ENDOSOME_TO_GOLGI_TRANSPORT	0.111645	-0.513385	5.67732	1.80592e-08	9.79733e-08	8.46397
GOBP_CELLULAR_MODIFIED_AMINO_ACID_BIOSYNTHETIC_PROCESS	0.0694917	-0.27534	5.67624	1.81697e-08	9.85029e-08	8.45806
GOBP_BIOLOGICAL_PROCESS_INVOLVED_IN_INTERACTION_WITH_SYMBIONT	0.043987	-0.296055	5.67394	1.84071e-08	9.9719e-08	8.44549
GOBP_NEGATIVE_REGULATION_OF_FIBROBLAST_MIGRATION	-0.122763	-0.0077372	-5.67276	1.85302e-08	1.00315e-07	8.43904
GOBP_PIGMENT_CELL_DIFFERENTIATION	0.0602491	-0.288704	5.66922	1.89053e-08	1.02273e-07	8.41963
GOBP_CERAMIDE_CATABOLIC_PROCESS	0.0426611	-0.595228	5.66886	1.8943e-08	1.02405e-07	8.4177
GOBP_RETINA_HOMEOSTASIS	-0.0449731	-0.173236	-5.66759	1.90793e-08	1.03069e-07	8.41076
GOBP_NEGATIVE_REGULATION_OF_NEURON_MIGRATION	0.0938144	0.029872	5.66327	1.95502e-08	1.05538e-07	8.38715
GOBP_DIPHOSPHOINOSITOL_POLYPHOSPHATE_METABOLIC_PROCESS	0.1713	-0.569533	5.65897	2.00312e-08	1.08058e-07	8.36361
GOBP_RESPONSE_TO_AMPHETAMINE	-0.0828072	-0.182431	-5.65851	2.00827e-08	1.08259e-07	8.36113
GOBP_ANTIGEN_PROCESSING_AND_PRESENTATION_OF_ENDOGENOUS_PEPTIDE_ANTIGEN	0.0217468	-0.849347	5.65639	2.0324e-08	1.09483e-07	8.34957
GOBP_PODOSOME_ASSEMBLY	0.0659281	-0.416954	5.65595	2.03753e-08	1.09682e-07	8.34712
GOBP_BLOOD_VESSEL_ENDOTHELIAL_CELL_MIGRATION	0.0329579	-0.242583	5.65532	2.04469e-08	1.0999e-07	8.34373
GOBP_NEGATIVE_REGULATION_OF_RESPONSE_TO_BIOTIC_STIMULUS	0.0226141	-0.524542	5.65414	2.0584e-08	1.1065e-07	8.33726
GOBP_CELLULAR_RESPONSE_TO_ETHANOL	0.106689	0.00936192	5.65093	2.09599e-08	1.12591e-07	8.31974
GOBP_RESPONSE_TO_MUSCLE_STRETCH	-0.101834	-0.232673	-5.6499	2.10817e-08	1.13166e-07	8.31413
GOBP_REGULATION_OF_CEREBELLAR_GRANULE_CELL_PRECURSOR_PROLIFERATION	-0.0174133	0.623049	-5.64641	2.14994e-08	1.15327e-07	8.29513
GOBP_NATURAL_KILLER_CELL_CHEMOTAXIS	-0.0481221	-0.46463	-5.6462	2.15249e-08	1.15383e-07	8.29399
GOBP_REGULATION_OF_ATRIAL_CARDIAC_MUSCLE_CELL_MEMBRANE_REPOLARIZATION	0.0721928	-0.187544	5.64413	2.17775e-08	1.16655e-07	8.28269
GOBP_NEGATIVE_REGULATION_OF_CATION_CHANNEL_ACTIVITY	-0.0672172	-0.15916	-5.64337	2.18704e-08	1.17071e-07	8.27857
GOBP_BLASTOCYST_FORMATION	-0.0636513	-0.287852	-5.64303	2.19127e-08	1.17164e-07	8.2767
GOBP_PHOSPHORYLATION	0.0136324	-0.242198	5.64298	2.19184e-08	1.17164e-07	8.27645
GOBP_NEGATIVE_REGULATION_OF_VASCULATURE_DEVELOPMENT	0.0326144	-0.191532	5.64164	2.20851e-08	1.17972e-07	8.26911
GOBP_SMOOTH_MUSCLE_ADAPTATION	0.204477	0.0301189	5.63971	2.23257e-08	1.19174e-07	8.25862
GOBP_REGULATION_OF_T_HELPER_17_CELL_LINEAGE_COMMITMENT	-0.0200349	0.49482	-5.6391	2.24028e-08	1.19502e-07	8.25529
GOBP_C_TERMINAL_PROTEIN_DEGLUTAMYLATION	-0.0567148	0.30123	-5.63305	2.31773e-08	1.23548e-07	8.22238
GOBP_GOLGI_VESICLE_TRANSPORT	0.0367627	-0.36198	5.6293	2.36706e-08	1.26089e-07	8.202
GOBP_VENOUS_BLOOD_VESSEL_DEVELOPMENT	0.0942989	0.069566	5.62663	2.40273e-08	1.279e-07	8.18752
GOBP_CELLULAR_RESPONSE_TO_ALKALOID	0.0272951	-0.396422	5.62512	2.42327e-08	1.28904e-07	8.17928
GOBP_REGULATION_OF_CAMP_DEPENDENT_PROTEIN_KINASE_ACTIVITY	0.0748031	-0.280916	5.62406	2.43763e-08	1.29577e-07	8.17357
GOBP_COPPER_ION_TRANSMEMBRANE_TRANSPORT	0.0822494	-0.0879429	5.62234	2.46126e-08	1.30743e-07	8.16423
GOBP_REGULATION_OF_EXTRINSIC_APOPTOTIC_SIGNALING_PATHWAY	0.0347763	-0.344716	5.61971	2.49781e-08	1.32592e-07	8.14996
GOBP_REGULATION_OF_RETINAL_GANGLION_CELL_AXON_GUIDANCE	0.160881	-0.136391	5.61819	2.51916e-08	1.33603e-07	8.14172
GOBP_REGULATION_OF_MULTICELLULAR_ORGANISM_GROWTH	0.0442578	-0.148574	5.61811	2.52036e-08	1.33603e-07	8.14126
GOBP_NEGATIVE_REGULATION_OF_PRODUCTION_OF_MOLECULAR_MEDIATOR_OF_IMMUNE_RESPONSE	0.0326136	-0.482569	5.61555	2.55683e-08	1.35443e-07	8.12736
GOBP_NEGATIVE_REGULATION_OF_RHO_PROTEIN_SIGNAL_TRANSDUCTION	0.0703114	-0.122328	5.61434	2.57412e-08	1.36264e-07	8.12084
GOBP_NEGATIVE_REGULATION_OF_VITAMIN_D_BIOSYNTHETIC_PROCESS	-0.0290008	0.649043	-5.61399	2.57924e-08	1.36441e-07	8.11891
GOBP_ENERGY_HOMEOSTASIS	0.0625758	-0.244381	5.61212	2.60629e-08	1.37777e-07	8.10881
GOBP_EXTRACELLULAR_TRANSPORT	0.0434682	0.0172597	5.6093	2.64778e-08	1.39873e-07	8.09353
GOBP_NEURON_PROJECTION_REGENERATION	0.0615668	-0.225939	5.60656	2.68875e-08	1.41939e-07	8.07867
GOBP_VASCULAR_ASSOCIATED_SMOOTH_MUSCLE_CELL_MIGRATION	0.0925393	-0.167853	5.60613	2.69518e-08	1.4218e-07	8.07636
GOBP_POSITIVE_REGULATION_OF_CEREBELLAR_GRANULE_CELL_PRECURSOR_PROLIFERATION	-0.0188617	0.621037	-5.60565	2.70244e-08	1.42465e-07	8.07376
GOBP_HETEROCHROMATIN_ORGANIZATION	0.0428285	-0.229231	5.60318	2.73998e-08	1.44345e-07	8.0604
GOBP_LOCOMOTORY_BEHAVIOR	0.0272886	-0.116221	5.60282	2.74555e-08	1.44539e-07	8.05844
GOBP_VENOUS_BLOOD_VESSEL_MORPHOGENESIS	0.142948	-0.00899716	5.60043	2.7825e-08	1.46383e-07	8.0455
GOBP_INCLUSION_BODY_ASSEMBLY	0.0508546	-0.611943	5.59808	2.81924e-08	1.48214e-07	8.03281
GOBP_LIPID_OXIDATION	0.0481899	-0.248628	5.59688	2.83814e-08	1.49105e-07	8.02635
GOBP_REGULATION_OF_PROTEIN_FOLDING	0.132795	-0.446732	5.59649	2.84447e-08	1.49334e-07	8.02419
GOBP_ANOIKIS	-0.0825802	-0.0529143	-5.59629	2.84753e-08	1.49393e-07	8.02315
GOBP_LYSOSOMAL_PROTEIN_CATABOLIC_PROCESS	0.0848715	-0.43899	5.59348	2.89264e-08	1.51655e-07	8.00794
GOBP_IRON_ION_TRANSPORT	0.0500582	-0.237552	5.5833	3.06161e-08	1.60404e-07	7.95301
GOBP_REGULATION_OF_INTRACELLULAR_TRANSPORT	0.0292155	-0.287668	5.57917	3.13286e-08	1.64024e-07	7.93075
GOBP_SEROTONIN_METABOLIC_PROCESS	0.092076	0.0604368	5.57257	3.25014e-08	1.70049e-07	7.8952
GOBP_DOUBLE_STRAND_BREAK_REPAIR_INVOLVED_IN_MEIOTIC_RECOMBINATION	-0.0183648	0.624341	-5.57032	3.2911e-08	1.72074e-07	7.88308
GOBP_ACTIVATION_OF_INNATE_IMMUNE_RESPONSE	-0.0559351	-0.169257	-5.56795	3.33464e-08	1.74231e-07	7.87037
GOBP_POSITIVE_REGULATION_OF_LONG_TERM_SYNAPTIC_POTENTIATION	0.0794157	-0.114391	5.56692	3.35392e-08	1.75118e-07	7.86479
GOBP_RESPONSE_TO_FRUCTOSE	0.131751	-0.226593	5.56468	3.39597e-08	1.77193e-07	7.85274
GOBP_CELL_REDOX_HOMEOSTASIS	-0.0808886	-0.273516	-5.56417	3.40559e-08	1.77574e-07	7.85
GOBP_CARDIAC_VENTRICLE_DEVELOPMENT	0.0371207	0.0111413	5.56343	3.41954e-08	1.7818e-07	7.84605
GOBP_ECTODERMAL_PLACODE_DEVELOPMENT	-0.0948082	-0.160356	-5.56269	3.43369e-08	1.78795e-07	7.84205
GOBP_KERATINOCYTE_DIFFERENTIATION	0.0470607	-0.0915134	5.56138	3.45875e-08	1.79978e-07	7.83502
GOBP_CEREBRAL_CORTEX_RADIALLY_ORIENTED_CELL_MIGRATION	0.0564037	-0.384057	5.56118	3.46254e-08	1.80052e-07	7.83396
GOBP_PHOSPHATE_ION_TRANSMEMBRANE_TRANSPORT	0.082939	-0.334781	5.5584	3.51641e-08	1.82729e-07	7.81903
GOBP_POSITIVE_REGULATION_OF_MULTICELLULAR_ORGANISM_GROWTH	0.0521235	-0.190223	5.55733	3.53733e-08	1.83691e-07	7.81329
GOBP_NEGATIVE_REGULATION_OF_CYTOKINE_PRODUCTION_INVOLVED_IN_IMMUNE_RESPONSE	0.0272531	-0.537806	5.55582	3.5671e-08	1.85112e-07	7.80518
GOBP_POSITIVE_REGULATION_OF_CARBOHYDRATE_METABOLIC_PROCESS	0.0453068	-0.078627	5.55563	3.57096e-08	1.85186e-07	7.80414
GOBP_GAMMA_DELTA_T_CELL_DIFFERENTIATION	-0.074417	0.154721	-5.55326	3.61827e-08	1.87427e-07	7.79141
GOBP_TETRAPYRROLE_METABOLIC_PROCESS	0.0627953	-0.361096	5.55322	3.61907e-08	1.87427e-07	7.79119
GOBP_NEGATIVE_REGULATION_OF_TRANSPORTER_ACTIVITY	-0.0466323	-0.116825	-5.5507	3.66996e-08	1.89934e-07	7.77769
GOBP_EMBRYONIC_BODY_MORPHOGENESIS	0.090694	-0.279931	5.55055	3.67304e-08	1.89964e-07	7.77688
GOBP_CAMERA_TYPE_EYE_MORPHOGENESIS	0.0279748	-0.13707	5.54927	3.69914e-08	1.91185e-07	7.77003
GOBP_NEGATIVE_REGULATION_OF_HAIR_FOLLICLE_DEVELOPMENT	-0.0182259	0.571996	-5.54897	3.70533e-08	1.91375e-07	7.76841
GOBP_NCRNA_EXPORT_FROM_NUCLEUS	-0.126506	-0.367864	-5.54859	3.71311e-08	1.91648e-07	7.76638
GOBP_PLASMA_MEMBRANE_ORGANIZATION	0.0329894	-0.293545	5.54791	3.72715e-08	1.92242e-07	7.76273
GOBP_NEGATIVE_REGULATION_OF_AUTOPHAGY	0.0378462	-0.359798	5.54359	3.81733e-08	1.96761e-07	7.73961
GOBP_STRESS_FIBER_ASSEMBLY	0.0406967	-0.255351	5.54273	3.83559e-08	1.97569e-07	7.73499
GOBP_REGULATION_OF_SYNAPTIC_VESICLE_MEMBRANE_ORGANIZATION	-0.021812	0.549614	-5.5424	3.84271e-08	1.9778e-07	7.7332
GOBP_NEUROTRANSMITTER_UPTAKE	0.0364617	-0.387606	5.5423	3.84485e-08	1.9778e-07	7.73266
GOBP_NEGATIVE_REGULATION_OF_GLUCONEOGENESIS	0.0740575	-0.228358	5.54144	3.86305e-08	1.98582e-07	7.7281
GOBP_POSITIVE_REGULATION_OF_GAP_JUNCTION_ASSEMBLY	-0.223649	-0.370937	-5.54072	3.8786e-08	1.99248e-07	7.72421
GOBP_POSITIVE_REGULATION_OF_INSULIN_LIKE_GROWTH_FACTOR_RECEPTOR_SIGNALING_PATHWAY	0.123763	-0.115726	5.53995	3.89519e-08	1.99965e-07	7.72008
GOBP_CELL_ACTIVATION	0.0133178	-0.324144	5.53837	3.92934e-08	2.01583e-07	7.71164
GOBP_RESPONSE_TO_PHEROMONE	-0.0310865	0.647644	-5.53428	4.01928e-08	2.06059e-07	7.68976
GOBP_GAS_TRANSPORT	-0.0995595	-0.0303979	-5.53366	4.03304e-08	2.06626e-07	7.68645
GOBP_INNER_CELL_MASS_CELL_DIFFERENTIATION	-0.0395786	0.352034	-5.53205	4.06916e-08	2.08337e-07	7.67783
GOBP_DNA_TEMPLATED_TRANSCRIPTION_INITIATION	-0.0380995	-0.371227	-5.52853	4.14915e-08	2.1229e-07	7.659
GOBP_SERINE_TRANSPORT	0.0812321	-0.149054	5.52354	4.26501e-08	2.18072e-07	7.63237
GOBP_RIBOFLAVIN_TRANSPORT	-0.027261	0.24382	-5.52137	4.31638e-08	2.20551e-07	7.6208
GOBP_MACROPHAGE_ACTIVATION	0.0274164	-0.315292	5.52102	4.32476e-08	2.20832e-07	7.61892
GOBP_POSITIVE_REGULATION_OF_UBIQUITIN_DEPENDENT_PROTEIN_CATABOLIC_PROCESS	0.0376044	-0.339699	5.51635	4.43748e-08	2.26436e-07	7.59404
GOBP_PROTEIN_DNA_COMPLEX_SUBUNIT_ORGANIZATION	-0.0267197	-0.344026	-5.51548	4.459e-08	2.27382e-07	7.58936
GOBP_REGULATION_OF_MICROTUBULE_BASED_PROCESS	0.0224252	-0.245001	5.51524	4.46492e-08	2.27532e-07	7.58808
GOBP_METANEPHRIC_MESENCHYME_DEVELOPMENT	0.0743637	-0.107748	5.51502	4.47012e-08	2.27645e-07	7.58696
GOBP_STABILIZATION_OF_MEMBRANE_POTENTIAL	-0.0720392	-0.0725935	-5.51459	4.48081e-08	2.28038e-07	7.58465
GOBP_MORPHOGENESIS_OF_AN_EPITHELIAL_FOLD	0.0666024	-0.0333297	5.51443	4.48481e-08	2.2809e-07	7.58379
GOBP_VESICLE_MEDIATED_TRANSPORT_BETWEEN_ENDOSOMAL_COMPARTMENTS	0.0606204	-0.421957	5.51368	4.50333e-08	2.28879e-07	7.5798
GOBP_BLOOD_VESSEL_REMODELING	0.0596502	-0.126115	5.51295	4.52146e-08	2.29648e-07	7.57592
GOBP_REGULATION_OF_GLUCAN_BIOSYNTHETIC_PROCESS	0.0679468	-0.14649	5.5117	4.55274e-08	2.31083e-07	7.56925
GOBP_CARDIAC_MUSCLE_CELL_CARDIAC_MUSCLE_CELL_ADHESION	0.085751	-0.368025	5.51017	4.59127e-08	2.32884e-07	7.5611
GOBP_NEGATIVE_REGULATION_OF_LAMELLIPODIUM_ASSEMBLY	-0.0438658	0.581532	-5.50963	4.60511e-08	2.33432e-07	7.55819
GOBP_SPHINGOSINE_BIOSYNTHETIC_PROCESS	0.0783021	-0.289583	5.50694	4.67377e-08	2.36755e-07	7.54389
GOBP_DIGESTIVE_TRACT_MORPHOGENESIS	0.056844	-0.0505906	5.50603	4.69708e-08	2.37778e-07	7.53907
GOBP_ATRIAL_SEPTUM_MORPHOGENESIS	-0.109757	0.110324	-5.50376	4.7563e-08	2.4059e-07	7.52696
GOBP_MICROTUBULE_ANCHORING_AT_CENTROSOME	0.0855422	-0.259404	5.50366	4.75892e-08	2.4059e-07	7.52643
GOBP_POSITIVE_REGULATION_OF_ORGANELLE_ASSEMBLY	0.0384539	-0.317792	5.50082	4.8339e-08	2.44219e-07	7.51132
GOBP_NEGATIVE_REGULATION_OF_ION_TRANSMEMBRANE_TRANSPORT	-0.0410809	-0.172541	-5.50017	4.85103e-08	2.44923e-07	7.5079
GOBP_POSITIVE_REGULATION_OF_LEUKOCYTE_TETHERING_OR_ROLLING	-0.0248924	0.594134	-5.49876	4.88876e-08	2.46665e-07	7.50041
GOBP_POLARIZED_EPITHELIAL_CELL_DIFFERENTIATION	0.0748477	-0.164034	5.49819	4.90412e-08	2.47276e-07	7.49738
GOBP_POSITIVE_REGULATION_OF_CELL_KILLING	0.0207731	-0.625065	5.49564	4.97347e-08	2.50597e-07	7.4838
GOBP_POSITIVE_REGULATION_OF_TELOMERE_MAINTENANCE_VIA_TELOMERE_LENGTHENING	-0.0644869	-0.347099	-5.49543	4.97923e-08	2.50597e-07	7.48268
GOBP_MEMBRANE_PROTEIN_INTRACELLULAR_DOMAIN_PROTEOLYSIS	0.0895351	-0.472102	5.49541	4.97981e-08	2.50597e-07	7.48257
GOBP_NEGATIVE_REGULATION_OF_LOW_DENSITY_LIPOPROTEIN_RECEPTOR_ACTIVITY	0.165133	-0.236751	5.49345	5.03379e-08	2.53147e-07	7.47215
GOBP_RESPONSE_TO_IONIZING_RADIATION	0.0364234	-0.242147	5.49289	5.04917e-08	2.53753e-07	7.4692
GOBP_REGULATION_OF_CILIUM_DEPENDENT_CELL_MOTILITY	0.0467157	-0.0276486	5.49258	5.05775e-08	2.54017e-07	7.46756
GOBP_TRANSCRIPTION_INITIATION_FROM_RNA_POLYMERASE_II_PROMOTER	-0.0452647	-0.349644	-5.49005	5.12852e-08	2.57402e-07	7.45413
GOBP_PROTEIN_DEGLUTAMYLATION	-0.042447	0.104416	-5.48983	5.1348e-08	2.57549e-07	7.45294
GOBP_LIPOXYGENASE_PATHWAY	0.128574	-0.296251	5.48726	5.20769e-08	2.61033e-07	7.43932
GOBP_NEGATIVE_REGULATION_OF_CANONICAL_WNT_SIGNALING_PATHWAY	0.0356926	-0.144536	5.48644	5.23115e-08	2.62038e-07	7.43497
GOBP_DEVELOPMENTAL_PIGMENTATION	0.051973	-0.255818	5.4824	5.34852e-08	2.67741e-07	7.41353
GOBP_REGULATION_OF_NEURON_PROJECTION_DEVELOPMENT	0.0197271	-0.130863	5.48215	5.35566e-08	2.67923e-07	7.41224
GOBP_ORGANIC_HYDROXY_COMPOUND_TRANSPORT	0.0254636	-0.153626	5.4814	5.37781e-08	2.68855e-07	7.40825
GOBP_HEAT_ACCLIMATION	0.0580159	-0.699232	5.4812	5.38379e-08	2.68978e-07	7.40718
GOBP_NUCLEOTIDE_TRANSMEMBRANE_TRANSPORT	-0.0872161	-0.179274	-5.47936	5.43825e-08	2.71522e-07	7.39745
GOBP_POSITIVE_REGULATION_OF_INTERLEUKIN_5_PRODUCTION	0.0624282	-0.00967022	5.47658	5.52172e-08	2.75509e-07	7.38273
GOBP_POSITIVE_REGULATION_OF_ESTABLISHMENT_OF_PROTEIN_LOCALIZATION_TO_TELOMERE	-0.141332	-0.489086	-5.47638	5.52776e-08	2.75631e-07	7.38167
GOBP_CELLULAR_RESPONSE_TO_HORMONE_STIMULUS	0.0265205	-0.275315	5.47535	5.55931e-08	2.77023e-07	7.37617
GOBP_PRESYNAPTIC_DENSE_CORE_VESICLE_EXOCYTOSIS	-0.0312151	0.588206	-5.47461	5.58182e-08	2.77964e-07	7.37227
GOBP_FAT_SOLUBLE_VITAMIN_BIOSYNTHETIC_PROCESS	0.0225712	-0.0736411	5.47386	5.60471e-08	2.78922e-07	7.36831
GOBP_IMMUNE_RESPONSE_REGULATING_CELL_SURFACE_RECEPTOR_SIGNALING_PATHWAY	0.0127114	-0.350901	5.47342	5.61819e-08	2.79411e-07	7.36599
GOBP_POSITIVE_REGULATION_OF_SODIUM_ION_TRANSMEMBRANE_TRANSPORTER_ACTIVITY	0.0797308	-0.367619	5.46946	5.74156e-08	2.85361e-07	7.345
GOBP_CYTOSOLIC_CALCIUM_ION_TRANSPORT	-0.0268197	-0.144449	-5.46715	5.81457e-08	2.88802e-07	7.33279
GOBP_LUNG_SECRETORY_CELL_DIFFERENTIATION	0.25671	-0.373325	5.46565	5.86244e-08	2.9099e-07	7.32486
GOBP_NEGATIVE_REGULATION_OF_CATALYTIC_ACTIVITY	0.0188456	-0.284356	5.46334	5.937e-08	2.945e-07	7.31265
GOBP_POSITIVE_REGULATION_OF_AXON_EXTENSION_INVOLVED_IN_AXON_GUIDANCE	0.165687	-0.266405	5.45904	6.07809e-08	3.01303e-07	7.28995
GOBP_ERAD_PATHWAY	0.0422658	-0.384505	5.4524	6.30257e-08	3.12228e-07	7.25491
GOBP_STEROID_BIOSYNTHETIC_PROCESS	0.032907	-0.284669	5.44933	6.40908e-08	3.17299e-07	7.23872
GOBP_RNA_CATABOLIC_PROCESS	-0.0296638	-0.341578	-5.44783	6.46155e-08	3.1969e-07	7.23084
GOBP_POSITIVE_REGULATION_OF_CD4_POSITIVE_ALPHA_BETA_T_CELL_PROLIFERATION	0.13883	-0.300514	5.44432	6.58651e-08	3.25662e-07	7.21234
GOBP_CHAPERONE_MEDIATED_AUTOPHAGY	0.0877884	-0.192909	5.44354	6.61459e-08	3.26839e-07	7.20823
GOBP_PERICARDIUM_MORPHOGENESIS	-0.0237541	0.460838	-5.44154	6.68691e-08	3.30198e-07	7.19772
GOBP_POSITIVE_REGULATION_OF_DEVELOPMENTAL_GROWTH	0.0304451	-0.175043	5.44114	6.70155e-08	3.30708e-07	7.19561
GOBP_MAINTENANCE_OF_PROTEIN_LOCATION_IN_NUCLEUS	-0.0746522	-0.384932	-5.43544	6.91298e-08	3.40921e-07	7.1656
GOBP_COPPER_ION_TRANSPORT	0.104418	-0.194646	5.42877	7.16839e-08	3.53289e-07	7.13055
GOBP_POSITIVE_REGULATION_OF_CALCIUM_ION_IMPORT	-0.0628369	-0.0217638	-5.42401	7.35611e-08	3.62307e-07	7.10558
GOBP_ADULT_BEHAVIOR	0.0286595	-0.176123	5.42124	7.4676e-08	3.67562e-07	7.09105
GOBP_VIRAL_PROTEIN_PROCESSING	0.0661204	-0.292685	5.41858	7.5765e-08	3.72682e-07	7.07707
GOBP_SKELETAL_MUSCLE_ATROPHY	0.141854	0.0873472	5.41646	7.66383e-08	3.76735e-07	7.066
GOBP_RESPONSE_TO_ESTRADIOL	0.0356754	-0.187207	5.4148	7.73313e-08	3.79898e-07	7.05731
GOBP_EAR_MORPHOGENESIS	0.0256584	-0.0199529	5.41266	7.82365e-08	3.84029e-07	7.04607
GOBP_DETECTION_OF_MECHANICAL_STIMULUS_INVOLVED_IN_SENSORY_PERCEPTION_OF_SOUND	0.0378181	-0.0314628	5.41257	7.82727e-08	3.84029e-07	7.04562
GOBP_T_HELPER_2_CELL_CYTOKINE_PRODUCTION	0.0682037	0.155032	5.41193	7.85445e-08	3.85115e-07	7.04227
GOBP_ANION_HOMEOSTASIS	0.0447986	-0.149062	5.41038	7.92093e-08	3.88125e-07	7.03413
GOBP_NEGATIVE_REGULATION_OF_LEUKOCYTE_CELL_CELL_ADHESION	0.0275269	-0.28512	5.40982	7.94507e-08	3.89059e-07	7.03119
GOBP_POSITIVE_REGULATION_OF_BLOOD_PRESSURE	0.0883753	-0.0531144	5.40748	8.04629e-08	3.93764e-07	7.01897
GOBP_FATTY_ACID_CATABOLIC_PROCESS	0.0539287	-0.288796	5.40556	8.13064e-08	3.97637e-07	7.0089
GOBP_DNA_DAMAGE_INDUCED_PROTEIN_PHOSPHORYLATION	0.0817914	-0.121664	5.40407	8.19622e-08	4.00588e-07	7.00114
GOBP_PLANAR_CELL_POLARITY_PATHWAY_INVOLVED_IN_AXIS_ELONGATION	-0.0191946	0.63268	-5.40174	8.30022e-08	4.05411e-07	6.98896
GOBP_RRNA_TRANSCRIPTION	-0.0692246	-0.382901	-5.40071	8.3469e-08	4.07431e-07	6.98355
GOBP_MICROTUBULE_BASED_TRANSPORT	0.0320181	-0.242922	5.3991	8.41992e-08	4.10733e-07	6.97513
GOBP_RESPONSE_TO_PEPTIDE_HORMONE	0.0292826	-0.208728	5.39821	8.4607e-08	4.12459e-07	6.97047
GOBP_GLIAL_CELL_DIFFERENTIATION	0.0278899	-0.229244	5.39723	8.50527e-08	4.14295e-07	6.9654
GOBP_NEGATIVE_REGULATION_OF_EXTRACELLULAR_MATRIX_DISASSEMBLY	0.152666	-0.151588	5.39715	8.5092e-08	4.14295e-07	6.96495
GOBP_NEGATIVE_REGULATION_OF_SMOOTHENED_SIGNALING_PATHWAY	0.0527123	-0.0583355	5.39433	8.63981e-08	4.20386e-07	6.95024
GOBP_REGULATION_OF_MICROGLIAL_CELL_ACTIVATION	0.0610823	-0.330317	5.39313	8.69597e-08	4.2285e-07	6.94398
GOBP_HISTONE_H4_K12_ACETYLATION	0.0913222	-0.282645	5.39256	8.72278e-08	4.23884e-07	6.94101
GOBP_LACTATE_TRANSMEMBRANE_TRANSPORT	0.129026	-0.379689	5.38971	8.85816e-08	4.29765e-07	6.92614
GOBP_POSITIVE_REGULATION_OF_SYNAPTIC_PLASTICITY	-0.0313199	0.420852	-5.38968	8.85996e-08	4.29765e-07	6.92594
GOBP_TISSUE_MIGRATION	0.0243105	-0.226419	5.38966	8.86067e-08	4.29765e-07	6.92587
GOBP_FILOPODIUM_ASSEMBLY	0.0409278	-0.0780236	5.38588	9.04367e-08	4.38363e-07	6.90613
GOBP_REGULATION_OF_INNATE_IMMUNE_RESPONSE	0.0235898	-0.368877	5.38525	9.07457e-08	4.39582e-07	6.90284
GOBP_REGULATION_OF_CELL_SIZE	0.0286892	-0.14798	5.38455	9.10867e-08	4.40954e-07	6.89921
GOBP_RETROGRADE_VESICLE_MEDIATED_TRANSPORT_GOLGI_TO_ENDOPLASMIC_RETICULUM	0.0554078	-0.406747	5.38433	9.11932e-08	4.4119e-07	6.89809
GOBP_CARDIAC_VASCULAR_SMOOTH_MUSCLE_CELL_DIFFERENTIATION	0.148005	-0.178879	5.38401	9.13509e-08	4.41674e-07	6.89642
GOBP_REGULATION_OF_HUMORAL_IMMUNE_RESPONSE_MEDIATED_BY_CIRCULATING_IMMUNOGLOBULIN	0.0439671	-0.471539	5.38021	9.3247e-08	4.50556e-07	6.87658
GOBP_REGULATION_OF_ANOIKIS	-0.105203	-0.172467	-5.37749	9.46238e-08	4.5692e-07	6.86243
GOBP_MYELIN_MAINTENANCE	0.0890316	-0.0794543	5.37519	9.58015e-08	4.62315e-07	6.85049
GOBP_POSITIVE_REGULATION_OF_AXON_EXTENSION	0.0558011	-0.346221	5.37507	9.58636e-08	4.62322e-07	6.84987
GOBP_POSITIVE_REGULATION_OF_RESPONSE_TO_TUMOR_CELL	0.0823968	-0.483911	5.37462	9.60969e-08	4.63156e-07	6.84752
GOBP_CELLULAR_RESPONSE_TO_VITAMIN	-0.0335446	0.302974	-5.374	9.64181e-08	4.64411e-07	6.8443
GOBP_REGULATION_OF_DNA_LIGATION	-0.204605	-0.172281	-5.36949	9.87916e-08	4.75544e-07	6.82082
GOBP_NEGATIVE_REGULATION_OF_PHAGOCYTOSIS	-0.0867552	-0.27686	-5.36934	9.88696e-08	4.75619e-07	6.82006
GOBP_CLATHRIN_DEPENDENT_ENDOCYTOSIS	0.0619317	-0.368019	5.36818	9.94907e-08	4.78306e-07	6.81401
GOBP_MAMMARY_GLAND_DUCT_MORPHOGENESIS	0.0278572	-0.347434	5.36688	1.00192e-07	4.81373e-07	6.80724
GOBP_AXONEMAL_CENTRAL_APPARATUS_ASSEMBLY	0.0512093	-0.127604	5.36604	1.00645e-07	4.83248e-07	6.80288
GOBP_VIRAL_LIFE_CYCLE	0.0290744	-0.346345	5.36042	1.0373e-07	4.97746e-07	6.77374
GOBP_ADAPTATION_OF_SIGNALING_PATHWAY	-0.0597569	-0.0106267	-5.35582	1.06325e-07	5.09882e-07	6.74988
GOBP_T_HELPER_17_CELL_DIFFERENTIATION	0.0507411	-0.0158618	5.3555	1.06511e-07	5.10449e-07	6.7482
GOBP_GLYCOLIPID_BIOSYNTHETIC_PROCESS	0.0427769	-0.201357	5.35355	1.07634e-07	5.15512e-07	6.73807
GOBP_POSITIVE_REGULATION_OF_PHAGOCYTOSIS	0.0333973	-0.281822	5.35313	1.07874e-07	5.16338e-07	6.73592
GOBP_REGULATION_OF_T_CELL_MEDIATED_CYTOTOXICITY	0.0189763	-0.735802	5.3489	1.10352e-07	5.27865e-07	6.71401
GOBP_T_CELL_ACTIVATION	0.0155022	-0.365459	5.34667	1.11683e-07	5.33898e-07	6.70244
GOBP_PRIMARY_AMINO_COMPOUND_METABOLIC_PROCESS	0.0775269	0.0537563	5.34499	1.1269e-07	5.38379e-07	6.69377
GOBP_ANTERIOR_COMMISSURE_MORPHOGENESIS	0.162114	-0.0529141	5.34352	1.13583e-07	5.42303e-07	6.68615
GOBP_HISTONE_CITRULLINATION	-0.0106066	-0.0826703	-5.34056	1.15402e-07	5.50643e-07	6.67082
GOBP_POSITIVE_REGULATION_OF_ENDOPLASMIC_RETICULUM_UNFOLDED_PROTEIN_RESPONSE	0.110962	-0.389674	5.33785	1.17086e-07	5.58096e-07	6.65684
GOBP_RHO_PROTEIN_SIGNAL_TRANSDUCTION	0.0284589	-0.20087	5.33782	1.1711e-07	5.58096e-07	6.65665
GOBP_L_SERINE_TRANSPORT	0.0815993	-0.122522	5.33252	1.2048e-07	5.73801e-07	6.62926
GOBP_PHARYNGEAL_SYSTEM_DEVELOPMENT	-0.0620506	0.139922	-5.32879	1.22904e-07	5.84978e-07	6.61005
GOBP_NEGATIVE_REGULATION_OF_ANOIKIS	-0.12714	-0.188712	-5.32681	1.24214e-07	5.90848e-07	6.59981
GOBP_POSITIVE_REGULATION_OF_ANTIGEN_PROCESSING_AND_PRESENTATION	0.111869	-0.0989886	5.32652	1.24405e-07	5.91388e-07	6.59833
GOBP_REGULATION_OF_HIPPO_SIGNALING	0.054943	-0.16159	5.32442	1.25811e-07	5.97701e-07	6.58749
GOBP_OXALOACETATE_METABOLIC_PROCESS	0.135018	-0.405677	5.32271	1.26967e-07	6.02669e-07	6.57867
GOBP_HEMOSTASIS	0.025508	-0.174184	5.32264	1.27015e-07	6.02669e-07	6.5783
GOBP_CELLULAR_CARBOHYDRATE_METABOLIC_PROCESS	0.0253064	-0.209609	5.3225	1.2711e-07	6.02749e-07	6.57758
GOBP_OXYGEN_TRANSPORT	-0.117255	0.0248516	-5.32194	1.27489e-07	6.04168e-07	6.57471
GOBP_RETINA_VASCULATURE_DEVELOPMENT_IN_CAMERA_TYPE_EYE	0.0539052	0.147979	5.31979	1.2896e-07	6.10761e-07	6.56364
GOBP_POSITIVE_REGULATION_OF_CELL_FATE_COMMITMENT	-0.016468	0.592886	-5.31646	1.31277e-07	6.2135e-07	6.54646
GOBP_PROTEIN_O_LINKED_GLYCOSYLATION_VIA_THREONINE	0.0851665	-0.126966	5.31517	1.3218e-07	6.25238e-07	6.53984
GOBP_REGULATION_OF_CHOLESTEROL_METABOLIC_PROCESS	0.0618907	-0.26704	5.31253	1.34061e-07	6.33741e-07	6.52621
GOBP_REGULATION_OF_PIGMENTATION	0.103154	-0.44666	5.31206	1.34397e-07	6.3494e-07	6.52379
GOBP_GAMMA_AMINOBUTYRIC_ACID_TRANSPORT	0.0703956	-0.470269	5.31138	1.3488e-07	6.36826e-07	6.52034
GOBP_MESODERMAL_CELL_DIFFERENTIATION	0.0513112	-0.210998	5.3062	1.38656e-07	6.54252e-07	6.4937
GOBP_POSITIVE_REGULATION_OF_RECEPTOR_SIGNALING_PATHWAY_VIA_STAT	-0.0420997	-0.240926	-5.30058	1.42872e-07	6.73641e-07	6.4648
GOBP_SPINDLE_ASSEMBLY	0.0260514	-0.40065	5.30037	1.43029e-07	6.73641e-07	6.46374
GOBP_ACTIVATION_OF_CYSTEINE_TYPE_ENDOPEPTIDASE_ACTIVITY_INVOLVED_IN_APOPTOTIC_PROCESS	-0.041471	-0.286534	-5.30037	1.4303e-07	6.73641e-07	6.46374
GOBP_SYMPATHETIC_NERVOUS_SYSTEM_DEVELOPMENT	-0.0935694	-0.0348742	-5.29733	1.45362e-07	6.84205e-07	6.44814
GOBP_POSITIVE_REGULATION_OF_T_CELL_MEDIATED_CYTOTOXICITY	0.0220948	-0.763285	5.29446	1.476e-07	6.94312e-07	6.4334
GOBP_POSITIVE_REGULATION_OF_HAIR_FOLLICLE_MATURATION	-0.0183597	0.590172	-5.29125	1.50141e-07	7.0583e-07	6.41694
GOBP_CARDIAC_CHAMBER_FORMATION	-0.105473	0.249014	-5.28813	1.52652e-07	7.17191e-07	6.40094
GOBP_ORGANIC_CATION_TRANSPORT	0.0413884	-0.385869	5.28354	1.56422e-07	7.34451e-07	6.37742
GOBP_REGULATION_OF_INSULIN_SECRETION_INVOLVED_IN_CELLULAR_RESPONSE_TO_GLUCOSE_STIMULUS	0.0530857	-0.249241	5.27827	1.60858e-07	7.5482e-07	6.35044
GOBP_REGULATION_OF_PRODUCTION_OF_MOLECULAR_MEDIATOR_OF_IMMUNE_RESPONSE	0.0207569	-0.379092	5.27194	1.66345e-07	7.80087e-07	6.3181
GOBP_TYPE_2_IMMUNE_RESPONSE	0.051079	0.0295239	5.26897	1.6898e-07	7.91956e-07	6.30295
GOBP_REGULATION_OF_SYNCYTIUM_FORMATION_BY_PLASMA_MEMBRANE_FUSION	0.0450547	-0.503901	5.26698	1.70774e-07	7.99875e-07	6.29276
GOBP_BEHAVIORAL_RESPONSE_TO_COCAINE	-0.0269756	-0.397149	-5.26402	1.73463e-07	8.11974e-07	6.2777
GOBP_REGULATION_OF_CHAPERONE_MEDIATED_AUTOPHAGY	0.0864562	-0.115543	5.26172	1.75588e-07	8.21415e-07	6.26596
GOBP_NUCLEAR_TRANSCRIBED_MRNA_CATABOLIC_PROCESS_NONSENSE_MEDIATED_DECAY	-0.0506631	-0.452936	-5.26124	1.7604e-07	8.23026e-07	6.26348
GOBP_POSITIVE_REGULATION_OF_DNA_METHYLATION_DEPENDENT_HETEROCHROMATIN_ASSEMBLY	0.0970249	-0.249165	5.26106	1.76208e-07	8.23307e-07	6.26256
GOBP_CELLULAR_RESPONSE_TO_REACTIVE_NITROGEN_SPECIES	0.0761175	-0.203522	5.26058	1.76656e-07	8.249e-07	6.26011
GOBP_GENE_SILENCING_BY_RNA	0.0354531	-0.320874	5.26017	1.77033e-07	8.26155e-07	6.25805
GOBP_INNER_MITOCHONDRIAL_MEMBRANE_ORGANIZATION	-0.0737486	-0.412288	-5.25745	1.79605e-07	8.37644e-07	6.24415
GOBP_CELLULAR_RESPONSE_TO_DEXAMETHASONE_STIMULUS	0.0815316	-0.310522	5.256	1.80979e-07	8.43538e-07	6.2368
GOBP_NON_CANONICAL_WNT_SIGNALING_PATHWAY	0.0406022	0.0317619	5.25562	1.81344e-07	8.44726e-07	6.23486
GOBP_REGULATION_OF_MITOPHAGY	-0.129916	-0.34334	-5.25529	1.81663e-07	8.45697e-07	6.23316
GOBP_POSITIVE_REGULATION_OF_DEFENSE_RESPONSE_TO_BACTERIUM	0.13561	0.0292163	5.25409	1.82817e-07	8.50549e-07	6.22706
GOBP_POSITIVE_REGULATION_OF_TRANSMEMBRANE_TRANSPORT	0.0326954	-0.189768	5.25242	1.84436e-07	8.57562e-07	6.21856
GOBP_PYRIMIDINE_CONTAINING_COMPOUND_CATABOLIC_PROCESS	0.0446793	-0.169036	5.24878	1.88019e-07	8.7369e-07	6.20001
GOBP_TRAIL_ACTIVATED_APOPTOTIC_SIGNALING_PATHWAY	-0.0951067	-0.4121	-5.24681	1.89983e-07	8.8228e-07	6.18999
GOBP_RNA_DEPENDENT_DNA_BIOSYNTHETIC_PROCESS	-0.0535784	-0.28534	-5.24648	1.90315e-07	8.83283e-07	6.18831
GOBP_REGULATION_OF_PROTEIN_TYROSINE_KINASE_ACTIVITY	0.0324813	-0.221195	5.24618	1.90608e-07	8.84105e-07	6.18683
GOBP_IRON_ION_TRANSMEMBRANE_TRANSPORT	0.0758683	-0.239158	5.24512	1.91682e-07	8.88551e-07	6.18141
GOBP_PROTEIN_LOCALIZATION_TO_CELL_CORTEX	0.0787412	0.0560139	5.23873	1.98246e-07	9.18421e-07	6.14895
GOBP_SEQUESTERING_OF_ZINC_ION	-0.14642	-0.41566	-5.23834	1.9866e-07	9.19494e-07	6.14694
GOBP_REGULATION_OF_RESPONSE_TO_BIOTIC_STIMULUS	0.018322	-0.352465	5.23828	1.98718e-07	9.19494e-07	6.14666
GOBP_REGULATION_OF_MYOTUBE_DIFFERENTIATION	0.0536721	-0.162861	5.23807	1.98942e-07	9.19974e-07	6.14557
GOBP_MITOCHONDRIAL_DEPOLARIZATION	0.0804087	-0.158977	5.23595	2.01176e-07	9.2974e-07	6.13481
GOBP_PROTEIN_LOCALIZATION_TO_CYTOSKELETON	0.0455514	-0.184962	5.23483	2.0236e-07	9.34647e-07	6.12916
GOBP_REGULATION_OF_NK_T_CELL_DIFFERENTIATION	0.113687	-0.130661	5.23174	2.05686e-07	9.49434e-07	6.11344
GOBP_RESPONSE_TO_FOLIC_ACID	0.139707	-0.350861	5.22923	2.08411e-07	9.61434e-07	6.10076
GOBP_DETERMINATION_OF_PANCREATIC_LEFT_RIGHT_ASYMMETRY	0.0888781	-0.0824454	5.22731	2.10531e-07	9.70625e-07	6.09101
GOBP_DEFENSE_RESPONSE_TO_BACTERIUM	0.0200375	-0.32167	5.22613	2.11846e-07	9.761e-07	6.085
GOBP_REGULATION_OF_PROTEIN_LOCALIZATION_TO_CHROMOSOME_TELOMERIC_REGION	-0.117942	-0.472956	-5.22599	2.12e-07	9.76223e-07	6.0843
GOBP_UBIQUITIN_DEPENDENT_ENDOCYTOSIS	0.120369	-0.512118	5.22455	2.13604e-07	9.83016e-07	6.07704
GOBP_RELAXATION_OF_CARDIAC_MUSCLE	0.0935139	-0.152726	5.224	2.14226e-07	9.85285e-07	6.07424
GOBP_POSITIVE_REGULATION_OF_CHROMATIN_ORGANIZATION	0.0890112	-0.256953	5.22117	2.17432e-07	9.99428e-07	6.05992
GOBP_SERTOLI_CELL_DEVELOPMENT	0.105664	-0.30314	5.22043	2.18286e-07	1.00275e-06	6.05614
GOBP_MYELOID_LEUKOCYTE_MEDIATED_IMMUNITY	0.0318367	-0.232822	5.21907	2.19847e-07	1.00932e-06	6.04928
GOBP_POSITIVE_REGULATION_OF_ALPHA_BETA_T_CELL_PROLIFERATION	0.0345068	-0.532403	5.21857	2.20426e-07	1.01137e-06	6.04674
GOBP_ALPHA_BETA_T_CELL_PROLIFERATION	0.0313054	-0.442807	5.21592	2.23514e-07	1.02492e-06	6.03334
GOBP_ACTIVATION_OF_PROTEIN_KINASE_B_ACTIVITY	-0.0762649	-0.0452628	-5.21159	2.28642e-07	1.04781e-06	6.01147
GOBP_REGULATION_OF_PROTEIN_TARGETING	0.0414819	-0.321232	5.20979	2.30817e-07	1.05714e-06	6.00235
GOBP_ESTABLISHMENT_OR_MAINTENANCE_OF_MONOPOLAR_CELL_POLARITY	0.0827913	-0.158464	5.20673	2.34545e-07	1.07357e-06	5.98692
GOBP_LEUKOCYTE_ADHESION_TO_ARTERIAL_ENDOTHELIAL_CELL	0.0468127	-0.5886	5.20644	2.3491e-07	1.0746e-06	5.98542
GOBP_NEGATIVE_REGULATION_OF_EXECUTION_PHASE_OF_APOPTOSIS	-0.106078	-0.371248	-5.2058	2.35695e-07	1.07754e-06	5.9822
GOBP_INTESTINE_SMOOTH_MUSCLE_CONTRACTION	-0.0431131	0.42852	-5.205	2.3668e-07	1.0814e-06	5.97818
GOBP_MATURATION_OF_SSU_RRNA_FROM_TRICISTRONIC_RRNA_TRANSCRIPT_SSU_RRNA_5_8S_RRNA_LSU_RRNA	-0.0403595	-0.478417	-5.20406	2.37854e-07	1.08612e-06	5.97342
GOBP_FEMALE_GAMETE_GENERATION	-0.0244246	-0.0519508	-5.20151	2.41055e-07	1.10007e-06	5.96054
GOBP_NUCLEOSOME_ORGANIZATION	-0.0282076	-0.36647	-5.20001	2.42945e-07	1.10804e-06	5.95301
GOBP_EOSINOPHIL_DIFFERENTIATION	-0.0382248	0.604293	-5.1979	2.45652e-07	1.11972e-06	5.94233
GOBP_POSITIVE_REGULATION_OF_MITOPHAGY	-0.212562	-0.446957	-5.19628	2.47741e-07	1.12857e-06	5.93418
GOBP_RESPONSE_TO_CATECHOLAMINE	0.0365583	-0.190321	5.1959	2.48232e-07	1.13013e-06	5.93227
GOBP_PROTEIN_IMPORT_INTO_MITOCHONDRIAL_MATRIX	-0.0908607	-0.379509	-5.19524	2.49089e-07	1.13336e-06	5.92895
GOBP_REGULATION_OF_CALCINEURIN_MEDIATED_SIGNALING	0.0568767	-0.272413	5.19377	2.51011e-07	1.14142e-06	5.92154
GOBP_REGULATION_OF_TRANSMEMBRANE_TRANSPORT	0.0173792	-0.125152	5.19199	2.53356e-07	1.1514e-06	5.91259
GOBP_FAT_SOLUBLE_VITAMIN_CATABOLIC_PROCESS	0.022493	0.650214	5.19132	2.5425e-07	1.15478e-06	5.90919
GOBP_RESPONSE_TO_CHEMOKINE	-0.0299208	-0.0506169	-5.18872	2.57722e-07	1.16985e-06	5.89613
GOBP_REGULATION_OF_HORMONE_SECRETION	0.0232569	-0.180052	5.18727	2.59678e-07	1.17803e-06	5.88884
GOBP_NEURON_PROJECTION_GUIDANCE	0.0176006	0.0902286	5.18629	2.61019e-07	1.18294e-06	5.88388
GOBP_REGULATION_OF_ATRIAL_CARDIAC_MUSCLE_CELL_MEMBRANE_DEPOLARIZATION	-0.0195947	0.434664	-5.18625	2.61069e-07	1.18294e-06	5.8837
GOBP_NEGATIVE_REGULATION_OF_CHROMATIN_ORGANIZATION	-0.0145711	0.532442	-5.18586	2.61598e-07	1.18463e-06	5.88175
GOBP_SENSORY_SYSTEM_DEVELOPMENT	0.0183755	-0.11946	5.18419	2.63895e-07	1.19432e-06	5.87333
GOBP_ASTRAL_MICROTUBULE_ORGANIZATION	0.140369	-0.263333	5.18243	2.66323e-07	1.2046e-06	5.8645
GOBP_G2_MI_TRANSITION_OF_MEIOTIC_CELL_CYCLE	-0.0241077	0.34751	-5.18145	2.67695e-07	1.21009e-06	5.85955
GOBP_MITOCHONDRION_DISTRIBUTION	0.0581581	-0.357798	5.18117	2.68083e-07	1.21113e-06	5.85816
GOBP_OLFACTORY_BULB_INTERNEURON_DIFFERENTIATION	-0.0272871	0.522903	-5.17812	2.72381e-07	1.22982e-06	5.84284
GOBP_ESTABLISHMENT_OF_PROTEIN_LOCALIZATION_TO_TELOMERE	-0.103967	-0.414638	-5.17756	2.73182e-07	1.23271e-06	5.84001
GOBP_POSITIVE_REGULATION_OF_NATURAL_KILLER_CELL_MEDIATED_IMMUNE_RESPONSE_TO_TUMOR_CELL	-0.023719	0.520628	-5.17491	2.76987e-07	1.24914e-06	5.82669
GOBP_TUMOR_NECROSIS_FACTOR_MEDIATED_SIGNALING_PATHWAY	0.0329752	-0.412725	5.17432	2.7784e-07	1.25224e-06	5.82373
GOBP_NEGATIVE_REGULATION_OF_VASCULAR_ASSOCIATED_SMOOTH_MUSCLE_CELL_APOPTOTIC_PROCESS	-0.0327141	0.756311	-5.17305	2.79681e-07	1.2598e-06	5.81736
GOBP_POSITIVE_CHEMOTAXIS	-0.0359012	-0.269466	-5.17235	2.80709e-07	1.26369e-06	5.81383
GOBP_MRNA_CATABOLIC_PROCESS	-0.0294345	-0.350505	-5.17166	2.81715e-07	1.26747e-06	5.81038
GOBP_PROTEIN_KINASE_C_SIGNALING	0.0412552	-0.363846	5.16815	2.86916e-07	1.29011e-06	5.79277
GOBP_PYRIMIDINE_NUCLEOTIDE_CATABOLIC_PROCESS	0.0659731	-0.336712	5.16399	2.93186e-07	1.31753e-06	5.77195
GOBP_AZOLE_TRANSMEMBRANE_TRANSPORT	0.0386175	-0.522609	5.16106	2.97692e-07	1.33699e-06	5.75726
GOBP_SYNAPTIC_VESICLE_RECYCLING	0.0354322	-0.230735	5.15985	2.99566e-07	1.34462e-06	5.75122
GOBP_MAPK_CASCADE	0.0156862	-0.202047	5.15437	3.08228e-07	1.38269e-06	5.72377
GOBP_G_PROTEIN_COUPLED_RECEPTOR_SIGNALING_PATHWAY	0.0141236	0.0238981	5.15322	3.10073e-07	1.39014e-06	5.71802
GOBP_CELLULAR_RESPONSE_TO_STEROID_HORMONE_STIMULUS	0.0348551	-0.302833	5.15167	3.12571e-07	1.40052e-06	5.71029
GOBP_REGULATION_OF_SMAD_PROTEIN_SIGNAL_TRANSDUCTION	0.0780117	-0.233565	5.15083	3.13933e-07	1.4058e-06	5.70611
GOBP_NEGATIVE_REGULATION_OF_SYNAPSE_ASSEMBLY	-0.034394	0.747344	-5.14895	3.17013e-07	1.41876e-06	5.69671
GOBP_REGULATION_OF_CELL_ACTIVATION	0.0125888	-0.374578	5.14791	3.18729e-07	1.42561e-06	5.69151
GOBP_CELLULAR_TRIVALENT_INORGANIC_ANION_HOMEOSTASIS	0.0690501	-0.145773	5.14646	3.21146e-07	1.43558e-06	5.68424
GOBP_MORPHOGENESIS_OF_A_POLARIZED_EPITHELIUM	0.0406812	-0.0610728	5.14364	3.25876e-07	1.45587e-06	5.67016
GOBP_DENSE_CORE_GRANULE_EXOCYTOSIS	-0.0273518	0.607767	-5.14195	3.28745e-07	1.46769e-06	5.66172
GOBP_REGULATION_OF_LYSOSOMAL_LUMEN_PH	0.0922347	-0.537523	5.14185	3.28905e-07	1.46769e-06	5.66125
GOBP_BLASTODERM_SEGMENTATION	-0.0338903	0.243522	-5.14137	3.29725e-07	1.47049e-06	5.65885
GOBP_NEGATIVE_REGULATION_OF_RESPONSE_TO_OXIDATIVE_STRESS	0.0808207	-0.291476	5.14063	3.30987e-07	1.47526e-06	5.65517
GOBP_REGULATION_OF_CHOLESTEROL_ESTERIFICATION	-0.155551	-0.33251	-5.13857	3.34552e-07	1.49028e-06	5.64486
GOBP_NEGATIVE_REGULATION_OF_SYNCYTIUM_FORMATION_BY_PLASMA_MEMBRANE_FUSION	0.179948	-0.193302	5.13751	3.36391e-07	1.49759e-06	5.63958
GOBP_POSITIVE_REGULATION_OF_AMPA_RECEPTOR_ACTIVITY	-0.0146944	0.535112	-5.1363	3.38494e-07	1.50608e-06	5.63358
GOBP_RESPONSE_TO_NITROGEN_COMPOUND	0.0205478	-0.254102	5.13479	3.4116e-07	1.51706e-06	5.62603
GOBP_CORTICOSPINAL_TRACT_MORPHOGENESIS	-0.0354323	0.391294	-5.13451	3.41656e-07	1.51838e-06	5.62463
GOBP_ENDOSOMAL_TRANSPORT	0.0343896	-0.351372	5.1338	3.42902e-07	1.52303e-06	5.62113
GOBP_NEGATIVE_REGULATION_OF_TORC1_SIGNALING	0.0570363	-0.107734	5.13299	3.44351e-07	1.5285e-06	5.61707
GOBP_INOSITOL_METABOLIC_PROCESS	0.0663107	-0.259012	5.13289	3.44533e-07	1.5285e-06	5.61656
GOBP_CERAMIDE_TRANSPORT	0.0966435	-0.157159	5.13206	3.46004e-07	1.53414e-06	5.61246
GOBP_MULTICELLULAR_ORGANISM_AGING	0.0598152	-0.266116	5.13101	3.47888e-07	1.5416e-06	5.60723
GOBP_POSITIVE_REGULATION_OF_DNA_DAMAGE_RESPONSE_SIGNAL_TRANSDUCTION_BY_P53_CLASS_MEDIATOR	-0.0813038	-0.183212	-5.12992	3.49871e-07	1.54949e-06	5.60176
GOBP_NEGATIVE_REGULATION_OF_INTRINSIC_APOPTOTIC_SIGNALING_PATHWAY_IN_RESPONSE_TO_DNA_DAMAGE	0.054475	-0.372308	5.12765	3.53998e-07	1.56686e-06	5.59047
GOBP_POSITIVE_REGULATION_OF_DEVELOPMENTAL_PIGMENTATION	0.115725	-0.550831	5.12725	3.54722e-07	1.56893e-06	5.5885
GOBP_REGULATION_OF_ESTABLISHMENT_OF_PROTEIN_LOCALIZATION_TO_CHROMOSOME	-0.119547	-0.480973	-5.1271	3.55002e-07	1.56893e-06	5.58775
GOBP_INDOLE_CONTAINING_COMPOUND_BIOSYNTHETIC_PROCESS	0.162298	-0.255505	5.12706	3.55082e-07	1.56893e-06	5.58753
GOBP_RAS_PROTEIN_SIGNAL_TRANSDUCTION	0.0176862	-0.234238	5.12345	3.61763e-07	1.59747e-06	5.56958
GOBP_REGULATION_OF_G_PROTEIN_COUPLED_RECEPTOR_SIGNALING_PATHWAY	0.0314448	-0.151926	5.12331	3.62018e-07	1.59747e-06	5.56891
GOBP_PROXIMAL_DISTAL_PATTERN_FORMATION	-0.0473747	-0.162087	-5.12323	3.62168e-07	1.59747e-06	5.56851
GOBP_RETINAL_METABOLIC_PROCESS	-0.0372154	-0.454155	-5.11928	3.69639e-07	1.62948e-06	5.54885
GOBP_POSITIVE_REGULATION_OF_RESPIRATORY_BURST	-0.0892928	-0.481935	-5.11914	3.69895e-07	1.62967e-06	5.54819
GOBP_SUCKLING_BEHAVIOR	0.0963376	0.0299559	5.11877	3.70604e-07	1.63185e-06	5.54634
GOBP_AMEBOIDAL_TYPE_CELL_MIGRATION	0.0225078	-0.210844	5.11756	3.72923e-07	1.64112e-06	5.54034
GOBP_NEGATIVE_REGULATION_OF_INTRINSIC_APOPTOTIC_SIGNALING_PATHWAY_BY_P53_CLASS_MEDIATOR	0.0563163	-0.461717	5.11713	3.73759e-07	1.64385e-06	5.53819
GOBP_COMPLEMENT_RECEPTOR_MEDIATED_SIGNALING_PATHWAY	-0.0351558	0.553088	-5.11692	3.74173e-07	1.64473e-06	5.53712
GOBP_REGULATION_OF_MOTOR_NEURON_APOPTOTIC_PROCESS	-0.0766671	0.129412	-5.11575	3.7644e-07	1.65374e-06	5.53131
GOBP_LYMPHOCYTE_ACTIVATION_INVOLVED_IN_IMMUNE_RESPONSE	0.0209607	-0.303959	5.11453	3.78816e-07	1.66322e-06	5.52525
GOBP_T_TUBULE_ORGANIZATION	0.0694761	0.0217587	5.10982	3.88123e-07	1.7031e-06	5.50189
GOBP_CELL_MIGRATION_INVOLVED_IN_SPROUTING_ANGIOGENESIS	0.04455	0.00671545	5.10614	3.95544e-07	1.73467e-06	5.48366
GOBP_CARDIAC_MUSCLE_CELL_MEMBRANE_REPOLARIZATION	0.0573306	-0.0538976	5.10122	4.05691e-07	1.77816e-06	5.45929
GOBP_SPINAL_CORD_OLIGODENDROCYTE_CELL_DIFFERENTIATION	0.100982	-0.334041	5.10046	4.07291e-07	1.78414e-06	5.4555
GOBP_RESPONSE_TO_MURAMYL_DIPEPTIDE	-0.0822737	-0.105021	-5.09823	4.11977e-07	1.80364e-06	5.44449
GOBP_POSITIVE_REGULATION_OF_NITRIC_OXIDE_SYNTHASE_BIOSYNTHETIC_PROCESS	0.0753241	-0.181299	5.09646	4.1576e-07	1.81916e-06	5.4357
GOBP_SCHWANN_CELL_DIFFERENTIATION	0.0458213	-0.0662044	5.09634	4.16013e-07	1.81923e-06	5.43511
GOBP_PYRIMIDINE_DEOXYRIBONUCLEOSIDE_MONOPHOSPHATE_METABOLIC_PROCESS	0.0841205	-0.441444	5.09617	4.16375e-07	1.81976e-06	5.43428
GOBP_FAT_CELL_DIFFERENTIATION	0.0252368	-0.24401	5.09033	4.29057e-07	1.87412e-06	5.40541
GOBP_POSITIVE_REGULATION_OF_OXIDATIVE_STRESS_INDUCED_INTRINSIC_APOPTOTIC_SIGNALING_PATHWAY	-0.185016	-0.375951	-5.08471	4.41618e-07	1.92789e-06	5.37765
GOBP_REGULATION_OF_FOREBRAIN_NEURON_DIFFERENTIATION	-0.125767	-0.3055	-5.0825	4.46649e-07	1.94873e-06	5.36675
GOBP_MAINTENANCE_OF_LENS_TRANSPARENCY	0.125577	-0.0839119	5.07923	4.54206e-07	1.98058e-06	5.35061
GOBP_REGULATION_OF_PROTEIN_TYROSINE_PHOSPHATASE_ACTIVITY	-0.106692	-0.404698	-5.07413	4.66244e-07	2.03191e-06	5.32544
GOBP_REGULATION_OF_TELOMERE_CAPPING	0.0525706	-0.277371	5.07312	4.68647e-07	2.04122e-06	5.3205
GOBP_B_CELL_APOPTOTIC_PROCESS	0.0551333	-0.383991	5.07179	4.71851e-07	2.054e-06	5.31394
GOBP_REPRODUCTION	0.0131143	-0.183331	5.07118	4.73327e-07	2.05926e-06	5.31094
GOBP_LONG_TERM_SYNAPTIC_DEPRESSION	0.0286301	-0.396252	5.06935	4.77793e-07	2.0775e-06	5.30191
GOBP_MITOCHONDRIAL_GENOME_MAINTENANCE	0.064362	-0.315538	5.06799	4.81135e-07	2.09085e-06	5.2952
GOBP_HISTONE_PHOSPHORYLATION	0.0477995	-0.241003	5.0668	4.84055e-07	2.10234e-06	5.28938
GOBP_TRIGLYCERIDE_RICH_LIPOPROTEIN_PARTICLE_CLEARANCE	-0.194993	0.0275512	-5.06645	4.84921e-07	2.1049e-06	5.28766
GOBP_GALACTOSE_METABOLIC_PROCESS	0.0865157	-0.446962	5.06463	4.89462e-07	2.12341e-06	5.2787
GOBP_STRIATED_MUSCLE_ATROPHY	0.122065	-0.0539604	5.06397	4.91112e-07	2.12936e-06	5.27546
GOBP_REGULATION_OF_ESTABLISHMENT_OR_MAINTENANCE_OF_CELL_POLARITY	0.0531166	-0.271436	5.06243	4.94999e-07	2.14499e-06	5.26788
GOBP_MACROMOLECULE_DEACYLATION	0.0320538	-0.354672	5.06151	4.97334e-07	2.15389e-06	5.26335
GOBP_DNA_DOUBLE_STRAND_BREAK_PROCESSING	-0.0541129	0.0124379	-5.0613	4.97864e-07	2.15497e-06	5.26233
GOBP_POSITIVE_REGULATION_OF_NUCLEAR_TRANSCRIBED_MRNA_CATABOLIC_PROCESS_DEADENYLATION_DEPENDENT_DECAY	-0.0944961	-0.375109	-5.06031	5.00392e-07	2.16468e-06	5.25746
GOBP_ENDOTHELIUM_DEVELOPMENT	0.02869	-0.274206	5.05955	5.02354e-07	2.17194e-06	5.25369
GOBP_CATECHOLAMINE_SECRETION	0.0332711	-0.0221389	5.05331	5.1862e-07	2.241e-06	5.22305
GOBP_CELL_SUBSTRATE_JUNCTION_ORGANIZATION	0.0362632	-0.26282	5.05232	5.21244e-07	2.25107e-06	5.21819
GOBP_CELLULAR_HYPOTONIC_RESPONSE	0.175781	-0.162061	5.051	5.24767e-07	2.26181e-06	5.21171
GOBP_ANTIBACTERIAL_PEPTIDE_PRODUCTION	-0.0222608	0.475754	-5.05083	5.25212e-07	2.26181e-06	5.2109
GOBP_ANTIMICROBIAL_PEPTIDE_PRODUCTION	-0.0222608	0.475754	-5.05083	5.25212e-07	2.26181e-06	5.2109
GOBP_POSITIVE_REGULATION_OF_ANTIBACTERIAL_PEPTIDE_PRODUCTION	-0.0222608	0.475754	-5.05083	5.25212e-07	2.26181e-06	5.2109
GOBP_POSITIVE_REGULATION_OF_ANTIMICROBIAL_HUMORAL_RESPONSE	-0.0222608	0.475754	-5.05083	5.25212e-07	2.26181e-06	5.2109
GOBP_GLYCOSYLATION	0.0230148	-0.154194	5.0469	5.35854e-07	2.30635e-06	5.19161
GOBP_REGULATION_OF_MESONEPHROS_DEVELOPMENT	-0.0389586	-0.0907379	-5.04616	5.37859e-07	2.31367e-06	5.18802
GOBP_NEGATIVE_REGULATION_OF_EPITHELIAL_CELL_APOPTOTIC_PROCESS	0.0557079	-0.197344	5.0453	5.40231e-07	2.32257e-06	5.18379
GOBP_ICOSANOID_TRANSPORT	0.0431531	-0.149777	5.04443	5.42628e-07	2.33156e-06	5.17953
GOBP_ACROSOME_REACTION	-0.0278102	0.206226	-5.04239	5.48313e-07	2.35466e-06	5.16951
GOBP_BONE_MINERALIZATION	-0.0271626	-0.0256669	-5.04177	5.50036e-07	2.36074e-06	5.16649
GOBP_REGULATION_OF_PHOSPHATIDYLINOSITOL_3_KINASE_ACTIVITY	-0.0358869	0.0977392	-5.04149	5.5083e-07	2.36282e-06	5.1651
GOBP_REGULATION_OF_UNSATURATED_FATTY_ACID_BIOSYNTHETIC_PROCESS	0.116128	-0.0905549	5.04124	5.51517e-07	2.36444e-06	5.16391
GOBP_LEUKOCYTE_MIGRATION_INVOLVED_IN_INFLAMMATORY_RESPONSE	-0.0490776	-0.283167	-5.04093	5.52396e-07	2.366e-06	5.16237
GOBP_SERINE_FAMILY_AMINO_ACID_METABOLIC_PROCESS	0.0523735	-0.285907	5.04089	5.525e-07	2.366e-06	5.16219
GOBP_PROTEIN_LOCALIZATION_TO_NUCLEOLUS	-0.122977	-0.294637	-5.04003	5.54938e-07	2.37511e-06	5.15796
GOBP_MITOCHONDRIAL_RESPIRASOME_ASSEMBLY	-0.148014	-0.281254	-5.03727	5.62797e-07	2.40655e-06	5.14444
GOBP_REGULATION_OF_THE_FORCE_OF_HEART_CONTRACTION	-0.0821152	0.0198	-5.03722	5.62914e-07	2.40655e-06	5.14424
GOBP_RIG_I_SIGNALING_PATHWAY	0.0617947	-0.422105	5.03685	5.63992e-07	2.40981e-06	5.1424
GOBP_POSITIVE_REGULATION_OF_RESPONSE_TO_ENDOPLASMIC_RETICULUM_STRESS	0.0519127	-0.409249	5.03532	5.68403e-07	2.4273e-06	5.13491
GOBP_POSITIVE_REGULATION_OF_CHOLESTEROL_ESTERIFICATION	-0.217375	-0.270565	-5.0344	5.71077e-07	2.43736e-06	5.1304
GOBP_CELLULAR_RESPONSE_TO_MECHANICAL_STIMULUS	0.0424957	-0.188954	5.0332	5.74573e-07	2.45091e-06	5.12453
GOBP_POSITIVE_REGULATION_OF_DNA_TEMPLATED_TRANSCRIPTION_INITIATION	-0.0485404	-0.314692	-5.03012	5.83625e-07	2.48814e-06	5.1095
GOBP_DETERMINATION_OF_DIGESTIVE_TRACT_LEFT_RIGHT_ASYMMETRY	0.0807018	-0.0690624	5.02934	5.85951e-07	2.49666e-06	5.10568
GOBP_NEGATIVE_REGULATION_OF_INSULIN_SECRETION_INVOLVED_IN_CELLULAR_RESPONSE_TO_GLUCOSE_STIMULUS	0.0956499	-0.540777	5.02867	5.87939e-07	2.50374e-06	5.10242
GOBP_TYPE_I_INTERFERON_PRODUCTION	0.0283669	-0.360038	5.02653	5.94387e-07	2.52978e-06	5.09193
GOBP_LEUKEMIA_INHIBITORY_FACTOR_SIGNALING_PATHWAY	0.08059	-0.245859	5.0264	5.94751e-07	2.52993e-06	5.09135
GOBP_REGULATION_OF_HORMONE_LEVELS	0.0170908	-0.18599	5.02548	5.97536e-07	2.54036e-06	5.08685
GOBP_POSITIVE_REGULATION_OF_MEMBRANE_DEPOLARIZATION	0.0944457	0.116915	5.02458	6.00278e-07	2.5506e-06	5.08245
GOBP_NON_CANONICAL_WNT_SIGNALING_PATHWAY_VIA_MAPK_CASCADE	-0.0238864	0.728816	-5.02445	6.00677e-07	2.55088e-06	5.08181
GOBP_REGULATION_OF_CELL_MIGRATION_INVOLVED_IN_SPROUTING_ANGIOGENESIS	0.0555617	-0.0605943	5.02323	6.04407e-07	2.56529e-06	5.07586
GOBP_POSITIVE_REGULATION_OF_LIPID_CATABOLIC_PROCESS	0.0465012	0.112821	5.02241	6.0694e-07	2.57461e-06	5.07184
GOBP_REVERSIBLE_DIFFERENTIATION	0.142316	0.317348	5.02219	6.07606e-07	2.57601e-06	5.07079
GOBP_POSITIVE_REGULATION_OF_HISTONE_MODIFICATION	0.0323624	-0.367149	5.02008	6.14156e-07	2.60121e-06	5.06048
GOBP_GLUTAMATE_METABOLIC_PROCESS	0.0578489	-0.283565	5.02006	6.14231e-07	2.60121e-06	5.06036
GOBP_POSITIVE_REGULATION_OF_PROTEIN_LOCALIZATION	0.0217846	-0.244536	5.01825	6.19887e-07	2.62371e-06	5.05155
GOBP_RECEPTOR_DIFFUSION_TRAPPING	-0.0284939	0.797217	-5.01584	6.27503e-07	2.65447e-06	5.03982
GOBP_REGULATION_OF_PATTERN_RECOGNITION_RECEPTOR_SIGNALING_PATHWAY	0.0218313	-0.405389	5.01245	6.38381e-07	2.699e-06	5.02329
GOBP_NUCLEOSOME_ASSEMBLY	-0.0359215	-0.39393	-5.01193	6.40081e-07	2.70469e-06	5.02074
GOBP_CARDIOCYTE_DIFFERENTIATION	0.034264	-0.199601	5.00615	6.59074e-07	2.7834e-06	4.99263
GOBP_REGULATION_OF_GONADOTROPIN_SECRETION	-0.0289595	0.421751	-5.00468	6.63997e-07	2.80265e-06	4.98548
GOBP_REGULATION_OF_CELLULAR_CARBOHYDRATE_METABOLIC_PROCESS	0.0322758	-0.194266	5.00452	6.64553e-07	2.80345e-06	4.98468
GOBP_SPERM_MOTILITY	0.0329951	0.0343499	5.00333	6.68546e-07	2.81874e-06	4.97892
GOBP_OLIGODENDROCYTE_PROGENITOR_PROLIFERATION	0.126822	-0.681807	5.00029	6.78903e-07	2.86e-06	4.96415
GOBP_SULFUR_COMPOUND_BIOSYNTHETIC_PROCESS	0.0362818	-0.229805	5.00024	6.79081e-07	2.86e-06	4.9639
GOBP_GLIAL_CELL_APOPTOTIC_PROCESS	0.0790886	-0.35876	4.99958	6.81361e-07	2.86802e-06	4.96067
GOBP_NUCLEOSIDE_MONOPHOSPHATE_CATABOLIC_PROCESS	0.0822094	-0.179256	4.99921	6.82638e-07	2.87181e-06	4.95887
GOBP_LIPID_CATABOLIC_PROCESS	0.0264939	-0.229085	4.99844	6.85299e-07	2.88142e-06	4.95514
GOBP_ASCENDING_AORTA_DEVELOPMENT	-0.19181	-0.303461	-4.99615	6.93275e-07	2.91336e-06	4.94402
GOBP_POSITIVE_REGULATION_OF_GASTRO_INTESTINAL_SYSTEM_SMOOTH_MUSCLE_CONTRACTION	-0.0321115	0.402939	-4.99528	6.96306e-07	2.92448e-06	4.93982
GOBP_PROTEIN_DNA_COMPLEX_ASSEMBLY	-0.0279886	-0.347455	-4.99501	6.97262e-07	2.92689e-06	4.9385
GOBP_SENSORY_PERCEPTION_OF_SMELL	-0.034635	-0.0735865	-4.99416	7.00262e-07	2.93707e-06	4.93438
GOBP_NEGATIVE_REGULATION_OF_TRANSCRIPTION_REGULATORY_REGION_DNA_BINDING	-0.0739881	-0.20912	-4.99411	7.00456e-07	2.93707e-06	4.93411
GOBP_POLYSACCHARIDE_METABOLIC_PROCESS	0.0359302	-0.184665	4.99373	7.01806e-07	2.94112e-06	4.93226
GOBP_CARBOHYDRATE_DERIVATIVE_METABOLIC_PROCESS	0.0176952	-0.23875	4.99341	7.02938e-07	2.94425e-06	4.93071
GOBP_GLUTAMATE_HOMEOSTASIS	0.106915	-0.190561	4.98924	7.17884e-07	3.00521e-06	4.9105
GOBP_NEGATIVE_REGULATION_OF_INTERLEUKIN_18_PRODUCTION	-0.0333743	0.496771	-4.98725	7.25126e-07	3.03386e-06	4.90085
GOBP_REGULATION_OF_GLIAL_CELL_APOPTOTIC_PROCESS	0.09685	-0.366386	4.98336	7.3948e-07	3.09222e-06	4.88202
GOBP_REGULATION_OF_SKELETAL_MUSCLE_CELL_PROLIFERATION	0.0957718	-0.0797047	4.98246	7.42851e-07	3.10462e-06	4.87765
GOBP_POSITIVE_REGULATION_OF_CATION_CHANNEL_ACTIVITY	-0.0496998	-0.0566072	-4.97545	7.69554e-07	3.21446e-06	4.84372
GOBP_NEGATIVE_REGULATION_OF_AMYLOID_PRECURSOR_PROTEIN_CATABOLIC_PROCESS	0.0781665	-0.227423	4.97401	7.75167e-07	3.23614e-06	4.83674
GOBP_TENDON_DEVELOPMENT	-0.0139932	0.64082	-4.97088	7.87445e-07	3.2856e-06	4.82164
GOBP_HEPATIC_STELLATE_CELL_ACTIVATION	0.102276	-0.347307	4.9706	7.88567e-07	3.28849e-06	4.82027
GOBP_ESTABLISHMENT_OF_PROTEIN_LOCALIZATION	0.0205457	-0.293288	4.96813	7.98437e-07	3.32784e-06	4.80833
GOBP_REGULATION_OF_TRIGLYCERIDE_CATABOLIC_PROCESS	0.0588166	0.200995	4.96644	8.05238e-07	3.35435e-06	4.80018
GOBP_MAINTENANCE_OF_BLOOD_BRAIN_BARRIER	0.0593694	-0.129934	4.9655	8.09064e-07	3.36845e-06	4.79563
GOBP_REGULATION_OF_SMALL_MOLECULE_METABOLIC_PROCESS	0.0244295	-0.199912	4.96452	8.13061e-07	3.38325e-06	4.79089
GOBP_PROTEIN_KINASE_A_SIGNALING	0.0644348	-0.233854	4.96397	8.15305e-07	3.39074e-06	4.78824
GOBP_NCRNA_3_END_PROCESSING	-0.0593994	-0.35763	-4.96382	8.15928e-07	3.39149e-06	4.78751
GOBP_POSITIVE_REGULATION_OF_MEMBRANE_POTENTIAL	-0.0961636	-0.26679	-4.96135	8.26089e-07	3.43186e-06	4.77562
GOBP_MYOTUBE_CELL_DEVELOPMENT	0.0524772	0.113885	4.96032	8.30364e-07	3.44775e-06	4.77066
GOBP_RESPONSE_TO_ACID_CHEMICAL	0.0345566	-0.2476	4.95937	8.34351e-07	3.46242e-06	4.76606
GOBP_REGULATION_OF_DNA_BIOSYNTHETIC_PROCESS	-0.0325229	-0.244888	-4.95792	8.40446e-07	3.48582e-06	4.75907
GOBP_REGULATION_OF_EXTRINSIC_APOPTOTIC_SIGNALING_PATHWAY_IN_ABSENCE_OF_LIGAND	0.0379523	-0.482201	4.95774	8.41199e-07	3.48705e-06	4.75821
GOBP_CARNITINE_TRANSPORT	0.152919	-0.320165	4.95757	8.41916e-07	3.48813e-06	4.75739
GOBP_POSITIVE_REGULATION_OF_GLUCOSE_IMPORT	0.0591317	-0.24928	4.95715	8.43684e-07	3.49356e-06	4.75538
GOBP_PROTEASOME_ASSEMBLY	-0.105076	-0.480308	-4.95626	8.47486e-07	3.50741e-06	4.75106
GOBP_REGULATION_OF_FATTY_ACID_BETA_OXIDATION	0.0513579	0.0532115	4.95413	8.5657e-07	3.54309e-06	4.74082
GOBP_POSITIVE_REGULATION_OF_CELL_GROWTH	0.0284858	-0.247345	4.95328	8.60218e-07	3.55625e-06	4.73674
GOBP_PRIMARY_AMINO_COMPOUND_BIOSYNTHETIC_PROCESS	0.128503	-0.180685	4.95125	8.69048e-07	3.59081e-06	4.72693
GOBP_POSITIVE_REGULATION_OF_DOPAMINE_RECEPTOR_SIGNALING_PATHWAY	0.161205	-0.425857	4.95054	8.72116e-07	3.60154e-06	4.72355
GOBP_PIRNA_METABOLIC_PROCESS	-0.00815617	0.393271	-4.94517	8.95934e-07	3.6979e-06	4.69767
GOBP_HISTONE_H3_K9_MODIFICATION	0.0351959	-0.234533	4.94495	8.96885e-07	3.69983e-06	4.69665
GOBP_ONCOSTATIN_M_MEDIATED_SIGNALING_PATHWAY	0.101904	-0.413389	4.94425	9.00037e-07	3.71083e-06	4.69329
GOBP_HAIR_FOLLICLE_PLACODE_FORMATION	-0.125365	-0.475703	-4.94359	9.03035e-07	3.72119e-06	4.69009
GOBP_PROTEIN_DNA_COMPLEX_DISASSEMBLY	-0.0648863	-0.350468	-4.94228	9.08964e-07	3.7436e-06	4.68381
GOBP_NEGATIVE_REGULATION_OF_ION_TRANSPORT	-0.0272106	-0.221331	-4.94196	9.10438e-07	3.74765e-06	4.68225
GOBP_EYE_PHOTORECEPTOR_CELL_DIFFERENTIATION	0.0339884	-0.297793	4.94003	9.19262e-07	3.78194e-06	4.67299
GOBP_REGULATION_OF_GENE_SILENCING_BY_RNA	0.0457188	-0.396635	4.93946	9.21875e-07	3.79065e-06	4.67026
GOBP_HISTONE_H3_K9_METHYLATION	0.0423581	-0.313886	4.93725	9.3211e-07	3.83067e-06	4.65966
GOBP_REGULATION_OF_CARBOHYDRATE_CATABOLIC_PROCESS	0.0579155	-0.298031	4.93533	9.41127e-07	3.86565e-06	4.65042
GOBP_REGULATION_OF_VASOCONSTRICTION	-0.0452505	0.118133	-4.93491	9.43105e-07	3.87169e-06	4.6484
GOBP_CELLULAR_RESPONSE_TO_INSULIN_STIMULUS	0.0312147	-0.216231	4.93476	9.43795e-07	3.87245e-06	4.6477
GOBP_POSITIVE_REGULATION_OF_CALCIUM_ION_TRANSPORT_INTO_CYTOSOL	-0.0701627	-0.123807	-4.93403	9.47274e-07	3.88463e-06	4.64417
GOBP_POSITIVE_REGULATION_OF_PROTEIN_LOCALIZATION_TO_CELL_CORTEX	0.073354	-0.191976	4.9299	9.6698e-07	3.96332e-06	4.6244
GOBP_CENTRAL_NERVOUS_SYSTEM_MYELIN_FORMATION	-0.0312635	0.557454	-4.92822	9.75149e-07	3.99466e-06	4.61632
GOBP_CELLULAR_RESPONSE_TO_MOLECULE_OF_BACTERIAL_ORIGIN	-0.0204278	-0.22909	-4.92511	9.90397e-07	4.05495e-06	4.60143
GOBP_TELOMERE_MAINTENANCE_VIA_TELOMERE_LENGTHENING	-0.0474267	-0.28978	-4.9224	1.00389e-06	4.10799e-06	4.58844
GOBP_REGULATION_OF_FATTY_ACID_METABOLIC_PROCESS	0.0438707	-0.18641	4.92012	1.01535e-06	4.15267e-06	4.57754
GOBP_OTIC_VESICLE_FORMATION	0.0811046	-0.0407443	4.91815	1.02537e-06	4.19139e-06	4.56812
GOBP_LYMPH_VESSEL_MORPHOGENESIS	0.0394109	0.272626	4.9173	1.02973e-06	4.20699e-06	4.56404
GOBP_CEREBELLAR_PURKINJE_CELL_GRANULE_CELL_PRECURSOR_CELL_SIGNALING_INVOLVED_IN_REGULATION_OF_GRANULE_CELL_PRECURSOR_CELL_PROLIFERATION	-0.018228	0.474832	-4.91436	1.0449e-06	4.26647e-06	4.55
GOBP_NEGATIVE_REGULATION_OF_PLASMA_MEMBRANE_BOUNDED_CELL_PROJECTION_ASSEMBLY	0.057432	-0.188756	4.91427	1.04541e-06	4.26647e-06	4.54954
GOBP_MONONUCLEAR_CELL_DIFFERENTIATION	0.0187108	-0.226734	4.90945	1.07075e-06	4.36754e-06	4.52655
GOBP_SENSORY_PERCEPTION_OF_MECHANICAL_STIMULUS	0.0264715	-0.119545	4.90424	1.09886e-06	4.47984e-06	4.50167
GOBP_HYPOTONIC_RESPONSE	0.133144	-0.0928874	4.90365	1.10209e-06	4.49059e-06	4.49886
GOBP_CARBOHYDRATE_METABOLIC_PROCESS	0.0198443	-0.216468	4.90185	1.11199e-06	4.52854e-06	4.49027
GOBP_NUCLEAR_TRANSCRIBED_MRNA_CATABOLIC_PROCESS_DEADENYLATION_INDEPENDENT_DECAY	-0.151384	-0.0929654	-4.90092	1.11716e-06	4.54718e-06	4.48582
GOBP_GRANZYME_MEDIATED_PROGRAMMED_CELL_DEATH_SIGNALING_PATHWAY	-0.130141	-0.320425	-4.90064	1.11868e-06	4.55094e-06	4.48452
GOBP_AORTIC_VALVE_MORPHOGENESIS	0.0252915	0.369502	4.89969	1.12401e-06	4.56825e-06	4.47995
GOBP_BILE_ACID_SECRETION	0.0355619	-0.529594	4.89967	1.12413e-06	4.56825e-06	4.47985
GOBP_POSITIVE_REGULATION_OF_INTRACELLULAR_TRANSPORT	0.0292503	-0.292334	4.89942	1.12548e-06	4.5713e-06	4.4787
GOBP_NEGATIVE_REGULATION_OF_CELL_SIZE	0.109193	-0.315881	4.89795	1.13374e-06	4.60241e-06	4.47168
GOBP_NEGATIVE_REGULATION_OF_CHOLESTEROL_EFFLUX	-0.0224984	0.529231	-4.89577	1.14607e-06	4.64998e-06	4.4613
GOBP_REGULATION_OF_MYELOID_DENDRITIC_CELL_ACTIVATION	-0.0437236	0.433251	-4.89523	1.14917e-06	4.66007e-06	4.45872
GOBP_PALLIUM_DEVELOPMENT	0.0283686	-0.267377	4.88771	1.19283e-06	4.83456e-06	4.42293
GOBP_NEGATIVE_REGULATION_OF_DNA_BINDING	-0.0547804	-0.19982	-4.88739	1.19474e-06	4.83974e-06	4.4214
GOBP_KILLING_BY_HOST_OF_SYMBIONT_CELLS	0.0771073	0.108572	4.88632	1.20108e-06	4.86285e-06	4.41632
GOBP_NEGATIVE_REGULATION_OF_INSULIN_LIKE_GROWTH_FACTOR_RECEPTOR_SIGNALING_PATHWAY	-0.0786977	0.149477	-4.88572	1.20466e-06	4.87475e-06	4.41346
GOBP_POSITIVE_REGULATION_OF_INHIBITORY_POSTSYNAPTIC_POTENTIAL	-0.0130238	0.141043	-4.88482	1.21004e-06	4.89395e-06	4.40919
GOBP_NEGATIVE_REGULATION_OF_LYMPHOCYTE_MEDIATED_IMMUNITY	0.0174322	-0.6164	4.88369	1.21679e-06	4.91865e-06	4.40385
GOBP_INTERLEUKIN_6_MEDIATED_SIGNALING_PATHWAY	0.0609556	-0.135422	4.88023	1.23783e-06	5.00104e-06	4.3874
GOBP_CARDIAC_VENTRICLE_FORMATION	-0.130208	0.0965342	-4.87821	1.25025e-06	5.04857e-06	4.37782
GOBP_REGULATION_OF_LIPID_STORAGE	0.0501165	-0.301958	4.87178	1.29066e-06	5.20899e-06	4.3473
GOBP_CELLULAR_GLUCAN_METABOLIC_PROCESS	0.0450395	-0.25574	4.87095	1.29598e-06	5.2277e-06	4.34336
GOBP_THORAX_AND_ANTERIOR_ABDOMEN_DETERMINATION	-0.0464277	0.412288	-4.86595	1.3284e-06	5.35479e-06	4.31966
GOBP_REGULATION_OF_T_CELL_DIFFERENTIATION	0.0224213	-0.288179	4.86587	1.32889e-06	5.35479e-06	4.31931
GOBP_CARDIAC_EPITHELIAL_TO_MESENCHYMAL_TRANSITION	0.0524477	-0.00272338	4.86424	1.33962e-06	5.39517e-06	4.31159
GOBP_POSITIVE_REGULATION_OF_NEURON_MIGRATION	0.0514795	-0.0971572	4.86352	1.34441e-06	5.41164e-06	4.30816
GOBP_MYOTUBE_DIFFERENTIATION_INVOLVED_IN_SKELETAL_MUSCLE_REGENERATION	0.171127	-0.329222	4.86222	1.35302e-06	5.44341e-06	4.30205
GOBP_REGULATION_OF_DNA_TEMPLATED_TRANSCRIPTION_INITIATION	-0.0457081	-0.320533	-4.86186	1.35548e-06	5.44819e-06	4.3003
GOBP_ANIMAL_ORGAN_FORMATION	0.0377497	0.0718731	4.86183	1.35563e-06	5.44819e-06	4.30019
GOBP_MAST_CELL_DIFFERENTIATION	-0.0157915	0.569012	-4.86058	1.36406e-06	5.47917e-06	4.29425
GOBP_REGULATION_OF_OXIDATIVE_PHOSPHORYLATION	-0.0741636	-0.414707	-4.86023	1.36639e-06	5.48567e-06	4.29261
GOBP_REGULATION_OF_B_CELL_APOPTOTIC_PROCESS	0.0571924	-0.411656	4.85755	1.38456e-06	5.55569e-06	4.27994
GOBP_REGULATION_OF_GLUCOSE_IMPORT	0.0389012	-0.264011	4.85544	1.39905e-06	5.61089e-06	4.26996
GOBP_ANTIGEN_PROCESSING_AND_PRESENTATION_OF_ENDOGENOUS_PEPTIDE_ANTIGEN_VIA_MHC_CLASS_I_VIA_ER_PATHWAY	0.0219283	-0.873864	4.85492	1.4026e-06	5.62215e-06	4.26753
GOBP_NEGATIVE_REGULATION_OF_CELL_ADHESION_MEDIATED_BY_INTEGRIN	0.0792924	-0.275519	4.85334	1.41357e-06	5.66318e-06	4.26005
GOBP_HISTONE_H3_K27_TRIMETHYLATION	-0.0114545	0.219874	-4.85276	1.4176e-06	5.67635e-06	4.25732
GOBP_POSITIVE_REGULATION_OF_TYPE_I_INTERFERON_PRODUCTION	0.0352044	-0.434505	4.85216	1.42181e-06	5.6902e-06	4.25448
GOBP_REGULATION_OF_CHROMATIN_ASSEMBLY	0.0514776	-0.149037	4.85097	1.4302e-06	5.7208e-06	4.24884
GOBP_CELLULAR_RESPONSE_TO_PEPTIDE_HORMONE_STIMULUS	0.0286037	-0.222911	4.84872	1.44611e-06	5.78141e-06	4.23823
GOBP_REGULATION_OF_MONOCYTE_CHEMOTAXIS	-0.0425689	-0.412286	-4.84647	1.4622e-06	5.84268e-06	4.22762
GOBP_PROTEIN_DEPHOSPHORYLATION	0.0196798	-0.303426	4.84476	1.47454e-06	5.88892e-06	4.21956
GOBP_REGULATION_OF_CELL_PROJECTION_ASSEMBLY	0.0249289	-0.217862	4.84226	1.49279e-06	5.95869e-06	4.20776
GOBP_AMINO_ACID_IMPORT	0.0439114	-0.269927	4.84079	1.50358e-06	5.99864e-06	4.20086
GOBP_SPECIFICATION_OF_SYMMETRY	0.0292098	-0.145216	4.84026	1.50752e-06	6.01122e-06	4.19835
GOBP_ESTABLISHMENT_OF_EPITHELIAL_CELL_APICAL_BASAL_POLARITY	0.0905343	-0.164181	4.83895	1.5173e-06	6.04704e-06	4.19215
GOBP_POSITIVE_REGULATION_OF_INFLAMMATORY_RESPONSE	0.0310501	-0.29126	4.8387	1.51916e-06	6.05131e-06	4.19097
GOBP_CORTICAL_CYTOSKELETON_ORGANIZATION	0.0468794	-0.297108	4.83626	1.53742e-06	6.12086e-06	4.17952
GOBP_IODIDE_TRANSPORT	-0.00976954	0.176031	-4.83596	1.53968e-06	6.12667e-06	4.17811
GOBP_NEGATIVE_REGULATION_OF_NERVOUS_SYSTEM_DEVELOPMENT	0.0248391	-0.102641	4.83451	1.55074e-06	6.16748e-06	4.17124
GOBP_SPINDLE_ASSEMBLY_INVOLVED_IN_FEMALE_MEIOSIS	-0.0224842	0.378537	-4.83344	1.5589e-06	6.19671e-06	4.16621
GOBP_AMINO_ACID_HOMEOSTASIS	0.0955428	-0.237095	4.83228	1.5678e-06	6.22881e-06	4.16076
GOBP_PROTEIN_LOCALIZATION_TO_NUCLEOPLASM	-0.110158	-0.450991	-4.83084	1.57889e-06	6.26962e-06	4.154
GOBP_MITOCHONDRIAL_GENE_EXPRESSION	-0.042712	-0.380885	-4.82646	1.61317e-06	6.40243e-06	4.13341
GOBP_SRP_DEPENDENT_COTRANSLATIONAL_PROTEIN_TARGETING_TO_MEMBRANE_TRANSLOCATION	0.121713	-0.244134	4.82486	1.62588e-06	6.44953e-06	4.12588
GOBP_RESPONSE_TO_CYCLOHEXIMIDE	0.0998973	-0.502566	4.82441	1.62946e-06	6.46037e-06	4.12378
GOBP_POSITIVE_REGULATION_OF_CHONDROCYTE_DIFFERENTIATION	0.0627633	0.116384	4.82351	1.63667e-06	6.4856e-06	4.11954
GOBP_REGULATION_OF_DNA_PRIMASE_ACTIVITY	-0.0279426	0.389945	-4.82216	1.64747e-06	6.525e-06	4.11324
GOBP_REGULATION_OF_NUCLEAR_TRANSCRIBED_MRNA_POLY_A_TAIL_SHORTENING	-0.0934086	-0.432819	-4.82109	1.65615e-06	6.55599e-06	4.1082
GOBP_MOTOR_NEURON_MIGRATION	0.220451	-0.499239	4.82034	1.66227e-06	6.57679e-06	4.10467
GOBP_POSITIVE_REGULATION_OF_AMYLOID_PRECURSOR_PROTEIN_BIOSYNTHETIC_PROCESS	0.085229	-0.319706	4.81995	1.66542e-06	6.58586e-06	4.10285
GOBP_GLOMERULUS_DEVELOPMENT	0.0410735	-0.107901	4.81925	1.67113e-06	6.60501e-06	4.09957
GOBP_REGULATION_OF_T_CELL_EXTRAVASATION	-0.0287037	-0.00603672	-4.81898	1.67333e-06	6.60851e-06	4.09831
GOBP_RNA_CAPPING	0.12229	-0.272224	4.81893	1.67374e-06	6.60851e-06	4.09807
GOBP_VITAMIN_TRANSPORT	0.0361634	-0.250581	4.81864	1.67612e-06	6.61448e-06	4.09671
GOBP_REGULATION_OF_GLUCONEOGENESIS	0.0414251	-0.244315	4.81825	1.67938e-06	6.62195e-06	4.09485
GOBP_REGULATION_OF_PH	0.0404632	-0.270868	4.8182	1.67974e-06	6.62195e-06	4.09464
GOBP_NEURONAL_ACTION_POTENTIAL_PROPAGATION	-0.0159265	0.527419	-4.81663	1.69271e-06	6.66964e-06	4.08727
GOBP_THYMOCYTE_APOPTOTIC_PROCESS	0.0663691	-0.0265503	4.81575	1.70003e-06	6.69502e-06	4.08313
GOBP_MYOBLAST_FUSION_INVOLVED_IN_SKELETAL_MUSCLE_REGENERATION	0.234868	-0.478427	4.81391	1.71533e-06	6.75181e-06	4.07455
GOBP_POSITIVE_REGULATION_OF_MRNA_METABOLIC_PROCESS	-0.0340394	-0.317254	-4.81343	1.71942e-06	6.7644e-06	4.07227
GOBP_CAVEOLIN_MEDIATED_ENDOCYTOSIS	-0.090592	-0.348117	-4.80949	1.75284e-06	6.89235e-06	4.05381
GOBP_REGULATION_OF_I_KAPPAB_PHOSPHORYLATION	0.0527123	-0.4891	4.80764	1.76877e-06	6.9514e-06	4.04514
GOBP_SKELETAL_MUSCLE_CELL_PROLIFERATION	0.0860779	-0.0888063	4.80561	1.78635e-06	7.01324e-06	4.03566
GOBP_PURINE_NUCLEOSIDE_METABOLIC_PROCESS	0.0689762	-0.299063	4.80545	1.7878e-06	7.01324e-06	4.03489
GOBP_NEGATIVE_REGULATION_OF_OXIDATIVE_STRESS_INDUCED_NEURON_INTRINSIC_APOPTOTIC_SIGNALING_PATHWAY	-0.161619	-0.370087	-4.80541	1.78811e-06	7.01324e-06	4.03472
GOBP_NEGATIVE_REGULATION_OF_MEIOTIC_CELL_CYCLE	-0.0695403	0.105508	-4.8054	1.78817e-06	7.01324e-06	4.03469
GOBP_BRANCHING_INVOLVED_IN_SALIVARY_GLAND_MORPHOGENESIS	0.039874	-0.339963	4.80278	1.81124e-06	7.09898e-06	4.0224
GOBP_INTERLEUKIN_1_MEDIATED_SIGNALING_PATHWAY	-0.052851	-0.103413	-4.8027	1.81189e-06	7.09898e-06	4.02206
GOBP_POSITIVE_REGULATION_OF_TELOMERASE_RNA_LOCALIZATION_TO_CAJAL_BODY	-0.104079	-0.441433	-4.80207	1.81752e-06	7.11737e-06	4.01909
GOBP_REGULATION_OF_EPITHELIAL_TO_MESENCHYMAL_TRANSITION	0.0278348	-0.0440676	4.79577	1.87417e-06	7.33546e-06	3.98968
GOBP_PROTEIN_LOCALIZATION_TO_NUCLEAR_BODY	-0.114926	-0.482373	-4.79382	1.89213e-06	7.40198e-06	3.98054
GOBP_FLUID_TRANSPORT	0.0562183	0.0752766	4.79318	1.89804e-06	7.42129e-06	3.97755
GOBP_AXIAL_MESODERM_DEVELOPMENT	-0.0895671	-0.268311	-4.79279	1.90162e-06	7.43149e-06	3.97574
GOBP_GLYCOPROTEIN_METABOLIC_PROCESS	0.0187634	-0.183605	4.7921	1.90805e-06	7.45282e-06	3.97251
GOBP_REGULATION_OF_CILIUM_ASSEMBLY	0.0381497	-0.249946	4.79118	1.91656e-06	7.48222e-06	3.96824
GOBP_UBIQUITIN_DEPENDENT_ERAD_PATHWAY	0.0413663	-0.41822	4.79063	1.92176e-06	7.49868e-06	3.96565
GOBP_CATION_TRANSPORT	0.012793	-0.16454	4.78942	1.93307e-06	7.53898e-06	3.96003
GOBP_NUCLEOBASE_CONTAINING_SMALL_MOLECULE_INTERCONVERSION	-0.116666	-0.442046	-4.7892	1.93519e-06	7.54246e-06	3.95898
GOBP_NEGATIVE_REGULATION_OF_CHONDROCYTE_PROLIFERATION	-0.0499563	0.375634	-4.78912	1.93594e-06	7.54246e-06	3.95861
GOBP_REGULATION_OF_VIRAL_TRANSCRIPTION	-0.0512438	-0.38816	-4.78731	1.95304e-06	7.6052e-06	3.95018
GOBP_REGULATION_OF_PROTEIN_NEDDYLATION	-0.0744679	-0.508659	-4.78498	1.9753e-06	7.688e-06	3.93932
GOBP_NEUTRAL_LIPID_CATABOLIC_PROCESS	0.0359246	-0.11516	4.78458	1.97912e-06	7.69892e-06	3.93747
GOBP_REGULATION_OF_POSTSYNAPTIC_CYTOSOLIC_CALCIUM_ION_CONCENTRATION	-0.0191401	0.689966	-4.7844	1.9809e-06	7.70192e-06	3.93661
GOBP_PROGESTERONE_METABOLIC_PROCESS	-0.105902	-0.0365669	-4.78361	1.98852e-06	7.72763e-06	3.93293
GOBP_POSITIVE_REGULATION_OF_CAMP_MEDIATED_SIGNALING	-0.0229887	0.591014	-4.78344	1.99018e-06	7.73016e-06	3.93213
GOBP_ANDROGEN_RECEPTOR_SIGNALING_PATHWAY	0.0469849	-0.339651	4.78044	2.01933e-06	7.83749e-06	3.9182
GOBP_FORELIMB_MORPHOGENESIS	0.0453205	-0.113063	4.78039	2.01987e-06	7.83749e-06	3.91795
GOBP_TYPE_B_PANCREATIC_CELL_PROLIFERATION	0.0961961	-0.143227	4.77959	2.0277e-06	7.8639e-06	3.91424
GOBP_ANTIGEN_PROCESSING_AND_PRESENTATION_ENDOGENOUS_LIPID_ANTIGEN_VIA_MHC_CLASS_IB	-0.0167809	0.522946	-4.77734	2.05005e-06	7.94257e-06	3.90374
GOBP_POSITIVE_REGULATION_OF_OPSONIZATION	-0.0389814	0.321761	-4.77723	2.0511e-06	7.94257e-06	3.90324
GOBP_REGULATION_OF_OPSONIZATION	-0.0389814	0.321761	-4.77723	2.0511e-06	7.94257e-06	3.90324
GOBP_INFLAMMASOME_COMPLEX_ASSEMBLY	-0.0434479	-0.132497	-4.77612	2.06218e-06	7.98144e-06	3.89808
GOBP_REGULATION_OF_CELLULAR_RESPIRATION	-0.0631804	-0.331098	-4.77583	2.06509e-06	7.98864e-06	3.89673
GOBP_MAINTENANCE_OF_ORGANELLE_LOCATION	0.0794998	0.0201567	4.77567	2.06667e-06	7.99072e-06	3.896
GOBP_ESTABLISHMENT_OF_SISTER_CHROMATID_COHESION	0.0772471	-0.359684	4.77248	2.09898e-06	8.11155e-06	3.88114
GOBP_REGULATION_OF_ANAPHASE_PROMOTING_COMPLEX_DEPENDENT_CATABOLIC_PROCESS	-0.0371379	0.407868	-4.77169	2.10706e-06	8.13862e-06	3.87746
GOBP_POSITIVE_REGULATION_OF_VASCULAR_ASSOCIATED_SMOOTH_MUSCLE_CELL_DIFFERENTIATION	0.127046	-0.0695245	4.77042	2.1201e-06	8.18485e-06	3.87155
GOBP_INTERLEUKIN_5_PRODUCTION	0.0361897	-0.135013	4.76804	2.14469e-06	8.27564e-06	3.8605
GOBP_RESPONSE_TO_COBALT_ION	-0.105638	-0.380546	-4.76792	2.14594e-06	8.27625e-06	3.85995
GOBP_RELAXATION_OF_VASCULAR_ASSOCIATED_SMOOTH_MUSCLE	-0.108503	0.205183	-4.76716	2.15378e-06	8.29941e-06	3.85645
GOBP_REGULATION_OF_OSSIFICATION	0.0272654	-0.0967933	4.76713	2.15411e-06	8.29941e-06	3.85631
GOBP_HOMEOSTATIC_PROCESS	0.0121657	-0.228096	4.76672	2.15839e-06	8.31171e-06	3.85441
GOBP_DNA_BIOSYNTHETIC_PROCESS	-0.0281877	-0.245388	-4.76571	2.169e-06	8.34836e-06	3.84971
GOBP_REGULATION_OF_LIPOPROTEIN_LIPASE_ACTIVITY	-0.0960315	0.0631649	-4.76454	2.18132e-06	8.39155e-06	3.84429
GOBP_MUSCLE_STRUCTURE_DEVELOPMENT	0.0193415	-0.19596	4.76276	2.20025e-06	8.4601e-06	3.83601
GOBP_POSITIVE_REGULATION_OF_SKELETAL_MUSCLE_FIBER_DEVELOPMENT	0.168632	-0.559135	4.76235	2.20461e-06	8.47262e-06	3.83411
GOBP_OVARIAN_FOLLICLE_DEVELOPMENT	0.0428007	-0.139117	4.76079	2.22136e-06	8.5327e-06	3.82686
GOBP_RENAL_SYSTEM_PROCESS	0.0295789	-0.148809	4.76025	2.22714e-06	8.5506e-06	3.82438
GOBP_VACUOLAR_ACIDIFICATION	0.0755429	-0.40981	4.75915	2.23902e-06	8.59189e-06	3.81928
GOBP_POSITIVE_REGULATION_OF_SKELETAL_MUSCLE_TISSUE_DEVELOPMENT	0.0320802	-0.601371	4.75867	2.24424e-06	8.60759e-06	3.81705
GOBP_ACTIN_FILAMENT_BASED_MOVEMENT	0.0271915	-0.102962	4.75569	2.27687e-06	8.72838e-06	3.80323
GOBP_POSITIVE_REGULATION_OF_DIGESTIVE_SYSTEM_PROCESS	0.0648834	-0.288987	4.7545	2.29004e-06	8.77445e-06	3.79771
GOBP_CHONDROCYTE_PROLIFERATION	0.0662712	-0.108146	4.75297	2.30697e-06	8.83491e-06	3.79065
GOBP_CELLULAR_RESPONSE_TO_CAMP	0.0576139	-0.214898	4.74933	2.34796e-06	8.98738e-06	3.77379
GOBP_KIDNEY_MESENCHYME_DEVELOPMENT	0.058417	-0.0122299	4.74667	2.37838e-06	9.09925e-06	3.76146
GOBP_FUNGIFORM_PAPILLA_DEVELOPMENT	-0.138213	-0.571457	-4.7454	2.39291e-06	9.14571e-06	3.75563
[truncated: 5,645 more rows]
