# Supplementary material for: Cell–cell communications shape tumor microenvironment and predict clinical outcomes in clear cell renal carcinoma
Source: J Transl Med. 2023 Feb 10;21:113. doi: 10.1186/s12967-022-03858-x (PMC9921120; doi:10.1186/s12967-022-03858-x)
Supplement: Supplementary file 6 — Additional file 6: Identification of highly expressed transcription factors and downstream regulatory genes in different tumor subgroups based on SCENIC algorithm. [file 12967_2022_3858_MOESM6_ESM.xlsx]

## Sheet: Transcription factors
TF	target	importance
RPS4X	RPL13A	101.822
RPS4X	RPL21	97.4328
RPS4X	RPS27	85.6337
RPS4X	SAA1	82.7894
FOS	EGR1	79.509
RPS4X	KRT19	78.0853
RPS4X	RPL7	77.9273
RPS4X	RPL31	77.7226
RPL35	RPS6	77.4946
RPS4X	RPL18A	76.5855
RPS4X	RPL26	74.9133
RPS4X	RPS14	74.2281
RPS4X	RPS8	72.8167
RPS4X	EEF1A1	72.5409
RPS4X	RPL34	72.373
RPS4X	RPS18	71.3895
RPS4X	RPL36	70.2748
RPS4X	RPS29	70.2357
RPS4X	RPL41	69.1749
RPS4X	RPS6	67.8787
RPS4X	RPL39	67.6593
RPS4X	RPL3	65.9948
RPS4X	TPT1	65.5474
RPS4X	RPS15	64.1896
RPS4X	RPL23A	63.4871
RPS4X	RPS23	63.4002
JUNB	FOS	63.0768
RPS4X	RPL12	63.0719
RPS4X	RPS25	62.2419
FOS	JUNB	61.6261
RPS4X	S100A1	61.5432
EGR1	FOS	61.4736
FOS	FOSB	61.1779
FOS	IER2	59.8531
RPS4X	RPL5	59.843
RPS4X	RPS16	59.4559
RPL6	RPL39	59.3869
RPS4X	RPS12	59.2404
RPS4X	REG1A	58.6922
RPL35	RPS29	58.4942
RPS4X	RPL10	58.4603
RPS4X	RPLP1	58.1559
RPS4X	RPL13	58.0009
RPS4X	FAU	57.9323
RPS4X	DEFB1	57.8291
RPS4X	RPS5	57.4716
RPS4X	RPS27A	57.2146
RPL35	RPL12	57.1554
RPS4X	RPL28	56.9884
RPS4X	GAPDH	56.4728
RPS4X	RPL11	56.336
RPS4X	RPS2	55.9886
RPL35	RPL36	55.4587
RPL35	RPS18	55.3893
RPL6	TMSB10	54.7731
KLF6	MALAT1	54.1376
RPL6	RPS6	53.693
RPS4X	RPLP2	53.6299
RPS4X	RPS13	53.5736
RPS4X	RPL36A	53.113
RPL35	RPL39	53.0647
RPS4X	RPS28	52.8735
RPL35	RPL13	52.8533
RPS4X	RPL9	52.5678
RPL35	RPS20	52.4507
RPL6	RPS27	51.9038
RPS4X	RPL19	51.6808
RPL6	RPS8	51.087
RPS4X	SAA2	51.0416
RPS4X	IFI27	50.9673
RPL35	RPL37	50.8219
RPS4X	RPS19	50.635
RPL6	RPL23A	50.6001
RPS4X	RPS3	50.5304
RPL6	RPL36A	50.5049
RPL35	RPL31	50.2583
RPS4X	SLPI	50.0843
RPS4X	RPL15	49.4611
RPL6	RPS3A	48.8672
RPL35	RPL7	48.7652
RPL6	RPL13	48.573
RPS4X	RPL24	48.5677
RPL6	RPL26	48.5635
ENO1	PGK1	48.4235
RPS4X	RPL35A	48.3674
RPS4X	RPL18	48.3026
FOS	SOCS3	47.8484
KLF6	MT-ND1	47.7876
RPS4X	RPLP0	47.6929
RPL35	RPS4X	47.4703
RPL35	RPS8	47.4189
RPL6	RPS24	47.3248
RPL35	RPS23	47.2689
RPL6	RPL19	47.2279
RPS4X	RPL35	47.1606
RPL6	RPS28	46.5248
RPL6	RPL5	46.4987
JUNB	ZFP36	46.424
RPL6	RPS25	46.4196
RPS4X	RPL32	46.1964
RPS4X	FTH1	46.1543
RPL6	RPS15	46.1238
RPL6	RPL41	45.9119
RPS4X	RPS15A	45.8316
RPS4X	MACROD2	45.5423
RPL6	RPS4X	45.5304
RPL35	RPS27A	45.5076
RPS4X	RPS3A	45.4205
RPL35	RPS27	45.3592
RPL35	RPS28	45.3503
RPS4X	APOL1	44.6621
RPS4X	TSPAN1	44.5086
RPS4X	RPL14	44.4823
RPL6	RPS19	44.3998
RPL6	RPL34	44.3633
RPS4X	RPL10A	44.1508
RPL35	RPL26	43.9155
RPL6	RPS5	43.7857
RPL35	RPL36A	43.6158
RPS4X	UBA52	43.5823
SOX4	CAV1	43.5465
RPS4X	ACSM2A	43.479
RPS4X	BTF3	43.4665
RPS4X	RPL8	43.0094
RPS4X	RPL27A	42.8753
RPL6	EEF1A1	42.83
RPL6	RPL35	42.7744
RPS4X	CLU	42.7614
RPL35	RPL41	42.3458
RPS4X	MT1G	42.0557
RPL35	RPS14	42.0005
RPS4X	RPS26	41.9844
RPL6	RPL29	41.9133
RPS4X	C1orf186	41.902
RPS4X	PNCK	41.8089
RPS4X	RPL23	41.7895
RPL6	RPL18A	41.7685
RPS4X	RPS7	41.6229
RPL6	RPL10	41.5615
JUN	IER2	41.2964
RPL6	RPS14	41.2777
RPS4X	RPL4	41.129
RPL35	RPLP1	41.0292
RPL6	RPL22	40.7935
KLF6	MT-ND2	40.7233
KLF6	DUSP1	40.6277
RPL6	RPL36	40.6171
RPS4X	RPS9	40.5695
RPS4X	RPS17	40.3831
RPS4X	SLC25A6	40.3791
JUN	FOSB	40.3174
CEBPB	MT1X	40.1139
RPL35	RPS15	40.1034
RPL35	RPL34	40.036
RPL6	RPL24	39.8812
JUNB	IER2	39.8272
RPL6	RPL32	39.8001
RPS4X	RPS20	39.6972
KLF6	MT-CO1	39.5925
RPL35	RPL19	39.418
RPS4X	ZMYND8	39.3515
RPS10	RPS27	39.3485
RPL6	RPLP2	39.3484
FOS	ATF3	39.1988
RPL6	RPS23	39.1745
RPL6	RPS18	39.1451
RPL35	RPS15A	38.8317
FOS	ZFP36	38.6343
RPS4X	C3	38.5757
RPS4X	PTPRM	38.5725
FOSB	FOS	38.2683
RPL6	RPLP0	38.1244
RPL35	RPL13A	38.0997
JUNB	SOCS3	38.0791
JUN	DUSP1	37.9613
FOS	SAA1	37.777
RPL35	RPLP2	37.4911
RPS4X	RPL6	37.4563
RPL6	RPL7	37.3701
UBB	FXYD2	37.3614
RPL6	RPLP1	37.2739
RPL35	RPL23A	37.2445
RPS4X	TMSB10	37.2119
RPL6	RPL9	37.0222
RPL6	RPL27A	36.7952
RPL6	RPL38	36.6876
FOSB	JUN	36.6311
RPL6	RPL13A	36.6223
EGR1	FOSB	36.5306
SOD1	IFI27	36.4963
RPL35	RPL5	36.4858
RPL6	RPS3	36.4573
RPL6	GAPDH	36.445
RPS4X	RPL37	36.3717
RPS4X	WFDC2	36.3672
RPL35	RPS25	36.2752
RPS4X	RPL36AL	36.2415
RPL35	RPS16	35.9756
RPS4X	PTMA	35.9076
FOS	MACROD2	35.8954
RPL35	RPL35A	35.7798
FOSB	JUNB	35.7292
RPS4X	MIF	35.3293
JUNB	SAA1	35.1893
RPL35	RPL6	35.1841
RPL35	RPL23	35.1326
RPL35	RPL24	35.0386
FOSB	EGR1	34.8413
RPL35	RPL30	34.78
RPS4X	RPL29	34.7153
RPL35	RPL18A	34.6768
KLF6	MT-CO3	34.6254
RPS4X	RPL38	34.6144
RPS4X	C19orf33	34.5684
RPS4X	RPL37A	34.5469
RPS4X	NEAT1	34.3001
FOS	CTD-3252C9.4	34.246
FOS	PDZK1IP1	34.211
RPS4X	SNHG25	34.0627
RPS4X	POLR2J3	33.9786
UQCRB	ATP5I	33.9291
RPL35	RPL9	33.7072
RPL6	RPS7	33.545
RPS4X	RPL27	33.3592
RPS4X	ANPEP	33.2519
RPL35	RPLP0	33.2177
RPL35	RPL18	33.1748
KLF6	MT-ND3	33.1648
FOS	KRT19	33.1383
CEBPB	MT2A	33.1361
RPS4X	S100A11	32.7965
RPS4X	HNRNPA1	32.7162
FOS	S100A1	32.7069
RPL6	RPL21	32.4917
RPL35	NBEAL1	32.4354
RPL6	RPL37A	32.3274
RPS4X	GSTA2	32.2314
RPL6	RPS12	32.1917
ENO1	TPI1	32.1134
HNRNPA1	RPL4	32.003
RPL6	RPL31	31.6731
EGR1	JUNB	31.5597
RPL6	RPL3	31.4897
RPL35	RPS21	31.458
RPL35	FAU	31.443
RPS4X	RPL30	31.347
EGR1	IER2	31.3286
JUNB	KRT19	31.2404
RPS4X	EIF3E	31.2341
RPL35	RPL27A	30.9373
RPL35	TPT1	30.8766
RPL6	FTH1	30.8594
RPL35	RPS19	30.8408
ZNF90	RPS16	30.7057
RPL6	RPL35A	30.6959
RPL35	RPS17	30.6886
RPL35	RPS26	30.686
EGR1	ZFP36	30.6716
RPL6	FAU	30.6252
RPS4X	RPS11	30.5732
RPL35	RPS13	30.5336
ENO1	PKM	30.5043
KLF6	VMP1	30.4297
FOS	IFI27	30.3698
RPS4X	PFDN5	30.2381
KLF6	MT-CO2	30.2
RPL35	RPS5	30.1556
RPL6	RPL14	30.1288
RPL6	RPL12	30.1116
FOS	SLPI	29.9378
RPS4X	EPB41L4A-AS1	29.9247
RPS4X	BIRC3	29.9179
RPL35	RPL4	29.8455
JUN	JUNB	29.7306
RPS4X	FTL	29.7172
RPL6	RPL18	29.6641
RPL6	RPL27	29.6522
RPL35	RPL11	29.6186
PAX8	SLPI	29.5968
SOD1	DEFB1	29.5033
RPL35	RPL3	29.4869
RPL6	RPS15A	29.3928
RPL6	RPS2	29.3903
RPL35	RPS3	29.2371
KLF6	MT-CYB	29.1721
FOS	DUSP1	29.0124
RPS4X	DDX17	29.0082
RPS4X	UGT2A3	28.9497
RPL6	RPL15	28.9459
EGR1	ATF3	28.9329
JUNB	JUN	28.8682
FOS	JUN	28.7202
SOX4	FXYD2	28.7081
SOD1	CRYAB	28.6292
RPL6	RPS20	28.6117
RPL6	RPL23	28.4516
RPL6	RPS17	28.4375
RPS4X	NACA	28.4303
RPL6	RPL28	28.3948
ENO1	NDUFA4L2	28.3839
RPL35	RPL28	28.3421
RPL6	RPL37	28.3286
JUNB	FOSB	28.1875
RPS4X	RPSA	28.1611
RPS4X	NBEAL1	28.1572
RPL6	RPL10A	28.1511
RPS4X	PPP1R14D	28.145
UBB	LGALS2	28.1361
SOD1	S100A1	28.074
RPS10	RPL39	28.0067
UBB	COX5B	27.9497
UQCRB	NDUFC1	27.8991
RPL35	RPS3A	27.895
RPS4X	CCNI	27.875
RPS4X	EIF4B	27.8261
RPL35	RPL10	27.7404
RPS4X	SAP18	27.6688
RPS4X	RPS24	27.6511
HNRNPA1	RPS4X	27.6272
RPL35	RPL38	27.6255
RPS4X	MALAT1	27.6143
UQCRB	GAPDH	27.5895
FOS	MT1X	27.3672
RPS10	RPL41	27.3465
FOS	SAA2	27.3259
FOS	XIST	27.2306
RPL6	RPS13	27.2124
RPL6	RPL11	27.122
DAB2	BHMT	27.1145
RPL35	RPL37A	27.0609
RPL35	EEF1A1	27.0384
JUNB	SAA2	26.8493
RPS4X	EEF2	26.8426
RPS4X	C1S	26.8291
CEBPB	SOD2	26.8284
ZBTB20	MALAT1	26.7608
JUN	PPP1R15A	26.7367
RPL35	RPS12	26.7138
UQCRB	PCBD1	26.6959
RPL35	RPL8	26.5351
JUNB	EGR1	26.5341
UQCRB	UQCRQ	26.1368
RPS4X	NPM1	26.1035
FOS	REG1A	26.0014
ZNF33A	AFF1	25.8873
RPS4X	EIF1	25.8515
RPL6	RPS11	25.7671
RPL6	FTL	25.737
ZBTB20	NEAT1	25.7021
NPDC1	BEX1	25.6093
ENO1	BNIP3	25.608
RPS4X	PILRB	25.6016
UQCRB	ATPIF1	25.5914
HNRNPA1	RPS14	25.4799
UBB	SERF2	25.4785
UQCRB	COX7C	25.4584
RPL35	RPS2	25.382
RPL35	RPL32	25.38
UQCRB	CYB5A	25.3776
UBB	FKBP2	25.271
UBB	NDUFA2	25.2496
RPS4X	RPL7A	25.2486
RPL6	PTMA	25.2187
RPL6	RPS21	25.2001
HSPA5	HSP90B1	25.1921
UBB	MALAT1	25.1833
ATF3	FOS	25.1828
UQCRB	LGALS2	25.1821
JUN	RHOB	25.1468
FOSB	XIST	25.1437
JUNB	DUSP1	25.0978
FOS	DEFB1	25.0753
RPS4X	PDZK1IP1	25.0708
RPS4X	CD74	25.0655
RPS10	RPS13	24.8993
CEBPB	SOX4	24.8754
RPL35	RPL7A	24.8193
UQCRB	USMG5	24.8135
RPL35	GAPDH	24.7779
UBB	MT1X	24.7333
RPL35	RPS24	24.6986
RPL35	RPS11	24.6378
SOD1	GSTA2	24.6073
RPS4X	MAOA	24.5864
RPL6	TPT1	24.5229
FOSB	PPP1R15A	24.436
RPS4X	MTRNR2L8	24.4323
RPS4X	PTER	24.423
CEBPB	CAV1	24.3694
RPS4X	RPS21	24.2784
JUN	FOS	24.2286
RPL6	RPL4	24.1635
RPS4X	ACSM2B	24.1266
RPL35	RPL27	24.1161
KLF6	NEAT1	24.0742
RPL6	HNRNPA1	24.0725
JUNB	H3F3B	24.0663
TPI1	GAPDH	24.0191
KLF6	MT-ATP6	24.0139
RPS4X	TOMM7	23.9888
RPS4X	VIM	23.987
JUN	EGR1	23.9656
ENO1	UBC	23.939
AKR1A1	MT2A	23.9334
ENO1	CD24	23.8957
RPS4X	CYP4F3	23.8204
SOX4	PDZK1IP1	23.8018
RPL6	RPS10	23.7729
RPS10	RPS18	23.72
UBB	MIF	23.6974
KLF6	MT-ND4	23.6714
ENO1	DDIT4	23.5773
ZBTB20	LINC01320	23.5558
RPL6	RPS16	23.5549
SOX4	XIST	23.5521
RPS4X	CAPG	23.52
RPL35	RPS10	23.5194
ZBTB16	POLR2J3	23.5157
RPS4X	ZNF90	23.5085
RPS10	RPL23	23.4938
UBB	ADIRF	23.4879
RPL35	UBA52	23.4829
HNRNPA1	RPL5	23.4646
RPS4X	SUMO2	23.4621
JUNB	S100A1	23.4607
FOS	TSPAN1	23.4555
SOD1	ROMO1	23.3764
UBB	FTL	23.3532
AKR1A1	C11orf54	23.2526
RPS4X	CAPN12	23.2474
TPI1	LDHA	23.2345
FOS	DDX5	23.207
UQCRB	MALAT1	23.1638
UBB	NDUFC1	23.1189
RPL35	S100A10	23.1176
RPL35	NPM1	23.0371
PAX8	ZMYND8	23.016
SOD1	DSTN	22.9749
RPL6	RPS27A	22.9493
RPS4X	ABCC3	22.9206
JUNB	IFI27	22.8493
TPI1	ENO1	22.8204
RPS4X	SNHG8	22.7078
HNRNPA1	RPL7	22.6848
RPS10	RPL35	22.6469
JUNB	TUBA1A	22.6386
PAX8	BIRC3	22.6293
UBB	MT-CO2	22.6205
SOD1	DYNLRB1	22.5954
FOS	H3F3B	22.58
UQCRB	GSTP1	22.508
RPL6	NNMT	22.3999
RPS4X	FKBP5	22.3852
RPL6	RPS26	22.3636
HSF4	RPL26	22.3519
RPL35	RPL21	22.3127
CEBPD	RHOB	22.3029
SOX4	MT2A	22.2718
CEBPB	MT3	22.244
SOD1	SAA1	22.2417
RPS4X	SLC17A3	22.2193
TPI1	PKM	22.2136
SOD1	UQCRQ	22.1885
ATF3	EGR1	22.1856
RPS4X	ESD	22.1646
RPS10	RPL7	22.1305
EZR	TMEM176A	22.1171
TPI1	PEBP1	22.0638
SOX4	DDIT4	22.0483
UBB	CRYAB	22.0329
RPL6	ACSM2A	22.0251
EGR1	JUN	21.9882
RPS10	RPLP2	21.9724
UBB	COX7B	21.9586
ENO1	RARRES2	21.9272
FOSB	DDX5	21.9166
FOSB	ZFP36	21.8859
TPI1	HSPB1	21.8456
RPS4X	SERPING1	21.823
RPS4X	YBX1	21.781
ENO1	GAPDH	21.7754
KLF6	TSC22D3	21.6845
RPL35	FTH1	21.6527
FOSB	SRSF7	21.6497
RPS4X	TGFBI	21.6435
UBB	IFI27	21.5951
SOX4	ADM	21.5922
JUNB	TSPAN1	21.5905
RPS4X	CAV1	21.5873
JUNB	PPP1R15A	21.585
UBB	ATP5I	21.5627
RPS4X	PRSS8	21.551
RPS4X	PAX8	21.531
LTF	SAA2	21.5074
RPS10	RPL10	21.452
RPS4X	MT2A	21.4072
RPL6	SNHG8	21.4059
UBB	DEFB1	21.3775
FOS	UGT2A3	21.3151
RPS4X	PRUNE2	21.3042
FOS	MT-ND1	21.2765
RPS4X	RPS10	21.269
ENO1	RPL34	21.2251
AKR1A1	NAT8	21.2147
JUNB	XIST	21.2043
RPS4X	RPL22	21.1975
LTF	SAA1	21.1092
UBB	NDUFA1	21.1022
RPS10	RPL13A	21.0912
SOX4	NOL3	21.0614
ATF3	IER2	21.0591
RPS10	RPS20	21.0315
RPS10	RPL35A	20.9911
UQCRB	UBB	20.9674
RPL6	RPL30	20.9663
SOX4	ATP5G3	20.9135
SOX4	CEBPB	20.8647
UBB	UQCRB	20.7894
RPL35	HNRNPA1	20.7868
RPS4X	HOOK2	20.7218
ZNF90	APOC1	20.6691
RPL6	BTF3	20.6592
UBB	S100A1	20.6506
JUNB	MT1X	20.6503
UBB	MYL6	20.6381
HNRNPA1	RPS6	20.6183
UBB	ATP5C1	20.5776
UQCRB	DDIT4	20.5679
UQCRB	ATP5J	20.5513
HNRNPA1	RPS27	20.5261
ENO1	PRDX1	20.4604
MESP1	RP11-138I17.1	20.4231
SOD1	UQCR11	20.4218
UQCRB	UQCR10	20.4181
RPS10	RPL9	20.4142
MDM2	ESYT1	20.4081
RPS4X	NDUFA4L2	20.3999
YBX1	MT-ND3	20.3915
RPL6	UQCRB	20.3877
HSF4	RPLP1	20.3451
UBB	OCIAD2	20.3351
RPL6	RPS9	20.335
RPL35	RPL14	20.3028
RPS4X	ANKRD36	20.2782
HNRNPA1	RPS8	20.2669
CANX	TMED9	20.2264
RPS4X	ACADVL	20.2105
UBB	PPDPF	20.2059
ZBTB20	VEGFA	20.191
SOD1	BNIP3	20.1746
RPS4X	MT1E	20.1594
JUNB	REG1A	20.1551
RPS4X	PDK4	20.0405
FOS	S100A11	20.033
PRDX5	FXYD2	20.0054
PAX8	PRSS8	19.999
HNRNPA1	RPS3	19.9935
SOX4	LGALS2	19.9644
UBB	MINOS1	19.9446
RPS4X	NDUFS5	19.9254
RPL35	TXN	19.9193
RPS4X	AOC1	19.9102
RPS10	RPL18A	19.8843
CEBPB	DDIT4	19.8663
RPS10	RPL30	19.8559
LTF	HP	19.8491
FOS	SNHG25	19.8461
RPS4X	TPM1	19.8428
JUN	ZFP36	19.8044
RPS10	FAU	19.7964
RPS4X	OXR1	19.7853
RPL6	ZFAS1	19.7742
PKM	ENO1	19.74
JUNB	PNRC1	19.7254
FOS	SRSF5	19.7047
YBX1	MT-CO1	19.6767
EZR	ITM2B	19.6669
UBB	GAPDH	19.6425
ZBTB16	LINC01320	19.6219
ETFB	KRT18	19.6073
UBB	MT-CYB	19.5521
RPS4X	GLTSCR2	19.5489
RPS10	RPS15A	19.5342
EGR1	MT-ND1	19.5287
RPL6	ENO1	19.5257
PAX8	ARHGEF38	19.5111
UBB	KRT18	19.5081
ENO1	LDHA	19.4897
FOS	TPM1	19.4861
UQCRB	MT-ND2	19.4827
UQCRB	MINOS1	19.4802
RPL6	NDUFA4L2	19.4707
RPL6	MT1X	19.4564
RPS4X	INADL	19.434
HNRNPA1	RPL13A	19.4034
RPL6	NEAT1	19.3607
JUNB	DEFB1	19.3453
ZBTB20	ACSM2A	19.3373
RPS10	RPS6	19.2737
RPS4X	CCDC146	19.268
MEF2C	ST14	19.234
PAX8	CFB	19.2201
HNRNPA1	RPS29	19.2093
UBB	BBOX1	19.203
P4HB	TMED9	19.181
SOD1	PEBP1	19.1764
UQCRB	PPDPF	19.1206
PKM	CMBL	19.118
RPL35	ZFAS1	19.0826
LTF	WFDC2	19.0783
RPS10	EEF1A1	19.0712
HNRNPA1	RPL3	19.0676
PRDX5	OCIAD2	19.0661
JUNB	EGLN3	19.0537
RPS4X	CFB	19.0412
RPL35	TMSB10	19.0266
UBB	GSTP1	18.9957
RPS4X	ENOSF1	18.8942
RPL35	RPL10A	18.8927
RPS10	RPS28	18.8786
RPS4X	C11orf54	18.8729
RPS4X	NDUFC1	18.8724
FOS	PPP1R15A	18.8714
FOS	SOX4	18.8547
P4HB	HLA-C	18.8419
ATF3	FOSB	18.8408
ELF3	RPS7	18.8153
UQCRB	TPT1	18.7763
CEBPB	NNMT	18.7727
UBB	PPIA	18.7288
RPL6	ACSM2B	18.7081
ZNF708	TJP2	18.661
ATF3	JUN	18.6574
ZBTB20	RPL29	18.6551
JUNB	MT-ND2	18.6534
JUN	ATF3	18.6492
RPL6	CYB5A	18.646
UBB	ANXA4	18.6369
RPS10	RPS5	18.6181
RPL35	PTMA	18.6172
UQCRB	FTL	18.6079
UQCRB	PRDX6	18.6065
UQCRB	FXYD2	18.6028
ZNF90	GLTSCR2	18.5873
CEBPB	CP	18.5744
PAX2	RPS4X	18.5645
RPL6	UBA52	18.5626
FOSB	CCNL1	18.5554
RPS10	RPLP0	18.5553
RPS4X	CDHR5	18.5508
ENO1	MT2A	18.5471
RPL6	CD74	18.4925
FOSB	SOCS3	18.4411
PAX8	KRT19	18.4152
RPS4X	GSTA1	18.4139
SOX4	APOC1	18.3865
RPL35	RPL29	18.3854
RPL6	RPL7A	18.3726
YBX1	MT-ND1	18.3713
ZBTB20	RPL26	18.3638
RPS4X	PPP2R3A	18.3483
ZBTB20	RPL41	18.3418
HNRNPA1	EEF1A1	18.3262
UBB	ALDOA	18.322
P4HB	TGFBI	18.3162
FOS	MCL1	18.3025
RPS4X	RBP5	18.2996
PAX2	PAX8	18.2959
RPL35	RPS7	18.2941
ZNF568	USP2	18.2911
UQCRB	TXN	18.2854
ENO1	PNRC1	18.2773
UBB	IGFBP3	18.2503
HNRNPA1	RPL21	18.2363
RPS4X	CLIC4	18.224
HNRNPA1	RPL26	18.2217
HNRNPA1	RPL23A	18.2154
PRDX5	UQCRQ	18.2143
FOSB	IER2	18.2005
ZCCHC17	PLOD3	18.1613
TPI1	CRYAB	18.1323
CEBPB	LGALS2	18.127
KLF6	S100A1	18.0923
RPS4X	UQCRH	18.0631
UQCRB	COX7B	18.0469
PDCD11	NOL11	18.0435
SOX4	CYB5A	18.0327
RPL6	CD24	18.0212
RPL6	RPL8	17.9937
RPS10	RPS21	17.9897
ANXA1	S100A6	17.9896
RPS4X	CST3	17.9869
PAX8	ANPEP	17.9373
RPS10	RPL26	17.9165
UBB	DYNLRB1	17.9123
UBB	CYB5A	17.8688
RPS4X	NAP1L1	17.8623
KLF6	RHOB	17.8591
ZBTB16	GAPDH	17.8169
ZNF90	MT1X	17.8071
RPL6	SEC61G	17.7658
SOD1	NDUFA1	17.7644
RPL6	ST13	17.7414
ZBTB20	RPL19	17.7273
RPS4X	UQCRB	17.7049
RPL35	RPL22	17.6966
CEBPB	APOC1	17.6888
RPL35	POLR2J3	17.6801
FOS	KLF4	17.6766
RPS10	RPL8	17.6334
UBB	S100A11	17.6237
AGMAT	KHK	17.6181
RPS4X	ZFAS1	17.5506
TAGLN2	S100A6	17.5347
EZR	ATP5B	17.5341
UBB	ETFB	17.5201
SOX4	ANGPTL4	17.5103
KLF6	MT-ND4L	17.5099
YBX1	CLYBL	17.4635
RPS10	RPS29	17.453
KLF6	STAT3	17.437
FOS	C19orf33	17.4277
RPL6	S100A10	17.416
ENO1	CD74	17.4037
UBB	MT-ATP6	17.388
FOSB	NFKBIZ	17.3646
FOS	MAOA	17.3207
RPS10	RPS27A	17.3123
EZR	NUCB1	17.2913
UBB	S100A13	17.2651
HNRNPA1	RPS18	17.2581
ESR2	C1orf132	17.2511
UQCRB	BNIP3	17.2305
HNRNPA1	RPS2	17.2296
ATF4	CSDE1	17.2261
FOSB	ATF3	17.2257
ZNF568	STK35	17.2082
FOSB	MYADM	17.1963
PAX8	ERBB3	17.1859
UBB	ATP5H	17.1832
JUNB	MT-ND1	17.1782
UBB	LDHA	17.1701
UBB	MGST3	17.1593
UQCRB	UQCR11	17.1551
RPS4X	CTSD	17.1224
RPS10	GSTP1	17.1193
JUNB	GSTA2	17.088
P4HB	CD151	17.079
FOS	C3	17.0754
RPS10	BTF3	17.0714
RPL6	MIF	17.0601
PAX8	UGT2A3	17.0534
RPS4X	SLC6A8	17.0394
RPL35	FTL	17.0388
RPS10	RPL19	17.0282
NPDC1	EGLN3	16.9788
FOSB	MCL1	16.9677
UQCRB	RPS10	16.9656
ENO1	LGALS1	16.952
PKM	ALDOA	16.9484
FOS	MT1G	16.9269
RPS10	EIF3E	16.909
BHLHE41	NDRG1	16.888
RPS4X	EGLN3	16.853
UBB	GSTA1	16.8373
HNRNPA1	RPS27A	16.819
RPL35	ATP5G2	16.8129
ZNF248	ZMYND8	16.8018
UBB	DSTN	16.7993
SOX4	MALAT1	16.7977
CEBPD	HILPDA	16.795
JUNB	FXYD2	16.7785
UBB	TPI1	16.768
RPL6	NACA	16.7651
RPS4X	GPX1	16.76
UQCRB	RPL24	16.7381
CEBPB	MT1F	16.738
TFEC	SLC4A4	16.7357
RPS10	RPL13	16.7299
IRX6	BEX1	16.7289
UBB	COX6C	16.7283
YBX1	MT-CO2	16.7111
RPS4X	LRRC41	16.6384
RPS4X	RP11-83A24.2	16.6363
EGR1	PPP1R15A	16.6334
RPS10	SNHG8	16.6332
P4HB	RPN2	16.6019
UBB	TXN	16.6014
RPS4X	CDA	16.5952
ZBTB43	CTA-243E7.1	16.5905
JUNB	PDZK1IP1	16.5896
CEBPB	MT-ATP6	16.587
RPL6	MT2A	16.586
RPS4X	HLA-DRB1	16.5783
ZBTB20	MT-CO3	16.57
KDM5A	FAM120A	16.5564
SOX4	TUBA1A	16.5223
ZNF655	ARHGEF38	16.5209
P4HB	APLP2	16.5164
SOX4	MT1X	16.505
SOX4	HINT1	16.5049
ENO1	TMEM59	16.5018
RPL6	ATP5G2	16.4828
SOD1	TCEB2	16.4683
EEF1D	LAMTOR4	16.4681
EZR	SARAF	16.4647
RPS4X	ENO1	16.4508
UBB	PRDX2	16.446
FOS	JUND	16.4409
UBB	ANGPTL4	16.4352
SOD1	ATP5G3	16.4315
RPS4X	HLA-DQB1	16.414
YBX1	MT-ATP6	16.4078
UQCRB	ATP5E	16.3993
ANXA1	ANXA2	16.3982
RPS4X	LDHA	16.3883
RFC2	ACY3	16.3866
RPS10	RPS3A	16.3834
ANXA1	IGFBP3	16.3675
RPS4X	RAB42	16.3625
SOX4	UQCRQ	16.3594
SOX4	ANXA4	16.3416
EGR1	MT1X	16.34
SOX4	DEFB1	16.3341
HSPA5	TMBIM6	16.3145
FOS	APOL1	16.3063
RORA	KCNJ16	16.2978
RPP25	F5	16.2617
A1CF	GAL3ST1	16.2316
SOD1	NDUFA4	16.2292
RPL35	LUC7L3	16.2279
FOS	ANPEP	16.2229
SOX4	DUSP1	16.2113
RPL35	RPS9	16.2076
RPS4X	PAX2	16.2039
RPL6	NBEAL1	16.1827
EZR	PKM	16.1743
RPL6	MALAT1	16.1742
EGR1	NEAT1	16.1735
RPS4X	LGALS3	16.1556
ZNF320	ZMYND8	16.1523
RPS4X	LGALS3BP	16.1077
RPL35	GNB2L1	16.1069
RPL6	RPS29	16.1009
SOX4	GSTA2	16.0985
RPS4X	EIF3L	16.0836
RPL6	ZNF90	16.0646
EZR	TMBIM6	16.0635
RPS10	RPS8	16.05
KLF6	ANGPTL4	16.0493
PAX2	RPS27	16.0041
UQCRB	NDUFS5	16.0018
PRDX5	S100A1	15.9817
ZNF320	RPS18	15.9733
RPL6	COX7C	15.9682
HNRNPA1	RPL34	15.9599
SOX4	COX5B	15.9496
RPS4X	REG1B	15.9451
ENO1	TMSB10	15.9415
ANXA1	SERPING1	15.9315
AKR1A1	GPX4	15.9307
KLF6	DDIT4	15.9227
JUNB	MT2A	15.9138
UBB	UQCR11	15.8828
SOX4	S100A1	15.8737
PAX8	UGT2B7	15.8618
PRDX5	IFI27	15.8452
NAP1L1	CCNI	15.839
RPS4X	EEF1D	15.8362
UBB	MT-ND3	15.8288
UBB	PCBD1	15.8241
SOD1	ADIRF	15.8145
HNRNPA1	RPS13	15.7723
ATF4	HSP90AB1	15.7611
UBB	MT-ND2	15.7578
RPS4X	S100A6	15.7387
HNRNPA1	RPS28	15.738
RPS4X	FAM65C	15.7353
UQCRB	ATP6V1F	15.7268
CEBPB	ERRFI1	15.7254
ENO1	CMBL	15.7185
UQCRB	ATP5C1	15.7114
PKM	TPI1	15.7057
JUNB	DDX5	15.688
RPL6	UBC	15.68
RPL6	PFDN5	15.6589
TPI1	LDHB	15.6556
UQCRB	ADIRF	15.6531
RPS4X	GNB2L1	15.6477
RBAK	TMEM248	15.6448
ZCCHC17	TMED9	15.6367
UBB	NDUFA11	15.6302
FOS	RBP5	15.624
RPS4X	LUC7L3	15.6175
JUN	NFKBIZ	15.6077
ENO1	EEF1A1	15.5904
ETFB	OCIAD2	15.5857
ZNF90	RPL21	15.5774
RPL6	SNRPD2	15.564
GPD1	AOC1	15.5618
RPS4X	HRCT1	15.5592
UBB	HRSP12	15.5541
TPI1	ALDOA	15.5509
CEBPB	PLOD2	15.5416
RPS4X	PGK1	15.5377
RPS4X	PLCB4	15.5351
ATF6B	RPL38	15.5268
RPL6	NPM1	15.5263
RPS4X	SNRPD2	15.5258
SOD1	MINOS1	15.5196
PAX8	AOC1	15.5099
RPL6	NDUFB4	15.5068
IRX6	ID1	15.4966
HNRNPA1	RPL13	15.494
P4HB	C1R	15.4922
EGR1	SERTAD1	15.4875
KLF6	RBM39	15.4832
ZBTB20	NACA	15.4773
UQCRB	RPL23	15.4672
RPS4X	DUSP23	15.4452
PAX8	WFDC2	15.4348
PKM	ACAA2	15.4332
ZBTB16	MALAT1	15.3935
RPL6	CLU	15.385
HNRNPA1	RPS5	15.3678
PAX8	MACROD2	15.3622
ZNF611	RPLP1	15.3578
PKM	MAOB	15.3462
UQCRB	GPX4	15.3285
ZBTB20	RASSF4	15.3095
HNRNPA1	RPL35	15.2916
RPS10	RPL36	15.2893
CEBPB	MT1E	15.2783
UBB	SRP14	15.271
ETFB	NAT8	15.2708
RPS10	RPS26	15.2614
UBB	NDUFB10	15.2525
RPS10	AC090498.1	15.2497
SOD1	ATP5I	15.2345
UBB	UQCR10	15.2316
RPS4X	RNF213	15.2261
EGR1	DDX5	15.221
EZR	SQSTM1	15.1993
ZNF611	TMSB10	15.1939
SOD1	GSTP1	15.1846
TPI1	ANXA4	15.1819
RPS10	NDUFA4L2	15.1371
RPS4X	CTSA	15.133
TAGLN2	PLP2	15.1206
FOSB	ZFAND5	15.1143
PRDX5	UBL5	15.1033
UQCRB	DNPH1	15.1011
KLF6	S100A13	15.1004
PAX8	IFI27	15.0962
UBB	UQCRQ	15.0907
SOD1	PPDPF	15.0869
JUN	CEBPD	15.0833
FOS	S100A13	15.0682
RPS4X	CES2	15.0652
SOD1	POLR2L	15.0507
UQCRB	ATP5H	15.0497
RPS4X	COMMD6	15.0471
RPL6	SUMO2	15.0426
RPS4X	FOS	15.0182
TBX2	PAM16	15.008
RPS4X	SERPINF2	14.9892
JUNB	MACROD2	14.9847
SOD1	ARL6IP4	14.9787
PAX8	PTER	14.9767
RPS4X	ZNF320	14.9723
RPL35	PFDN5	14.9636
JUNB	MT-CO2	14.9635
YBX1	MT-CO3	14.9589
GRHPR	SMIM24	14.9574
RPS4X	DOC2A	14.957
SOX4	KRT18	14.9564
RPL35	YBX1	14.9562
RPS10	RPL21	14.9293
GTF2I	MGEA5	14.9203
RPS4X	SLC39A5	14.911
FOSB	SERTAD1	14.8967
PAX2	RPL7	14.8742
HNRNPA1	RPL12	14.8719
P4HB	PDIA6	14.8653
NUCB1	TMED9	14.8632
HNRNPA1	RPL18A	14.8624
ANXA1	C1R	14.8593
PPARGC1A	AQP1	14.8307
UQCRB	NSA2	14.8159
ZNF559	HOOK2	14.8066
ZBTB20	ACSM2B	14.8063
SOD1	SAA2	14.8057
UQCRB	DYNLRB1	14.7871
HSF4	RPS3A	14.7746
ZNF320	ANKRD36B	14.7698
KLF6	ZFP36L1	14.768
FOSB	HLA-E	14.7665
NAP1L1	PABPC1	14.7609
UQCRB	BLOC1S1	14.7592
UQCRB	C14orf2	14.7589
ZNF532	SNX21	14.7577
YBX1	MT-CYB	14.7472
EZR	CRYAB	14.7462
A1CF	GRINA	14.7321
SOD1	MIF	14.7293
RPL6	NDUFS5	14.7292
SOX4	SERPINA1	14.7277
JUN	MALAT1	14.7124
YBX1	SEC61G	14.7111
RAN	PSMA7	14.7023
RPL35	ACSM2B	14.6965
YBX1	MT-ND2	14.6945
JUNB	RHOB	14.69
RPS10	RPS17	14.685
SOD1	UBB	14.6673
SOD1	TMEM176A	14.667
YBX1	NDUFS5	14.6586
RPS4X	SLC44A4	14.6543
ZBTB20	POLR2J3	14.6522
UQCRB	SHFM1	14.6521
PLAGL1	PTPRM	14.6472
LTF	CFB	14.6429
RPS10	RPL36A	14.6344
EGR1	MCL1	14.6332
PRDX5	GHITM	14.6241
ID4	ID1	14.6118
RPS4X	MT1X	14.5987
RPL6	SLC25A6	14.5908
RPS10	RPS14	14.5862
ZBTB20	MT-ND3	14.5839
SOX4	KRT19	14.5815
MDM2	DDB2	14.5664
UQCRB	DBI	14.5633
P4HB	IGFBP3	14.5488
SOX4	NPTX2	14.5417
PAX8	PLXNB2	14.5406
PRDX5	C14orf2	14.5325
UBB	SAP18	14.5308
SOD1	PPIA	14.5219
SOX4	CD74	14.5179
PAX8	CES2	14.5166
UQCRB	NDUFA1	14.5107
SOX4	IFI27	14.5031
HNRNPA1	RPL6	14.4981
ZBTB20	CHD9	14.4753
RPS10	RPL27	14.4654
HNF4A	CUBN	14.4591
ZBTB20	MT-ATP6	14.4559
FOS	TSC22D1	14.4545
ENO1	VIM	14.4518
RPL35	PTPRM	14.4427
UQCRB	EEF1A1	14.4421
RPS10	RPS7	14.4384
UQCRB	MT-ATP6	14.4328
PLAGL1	RPS25	14.4319
ZBTB20	ITGB8	14.4246
UBB	NDUFA4	14.4184
RPS4X	GSTP1	14.3949
SETBP1	MRPS5	14.3925
KLF6	RASSF4	14.3631
HSF4	RPL6	14.3561
PAX2	RPL18A	14.3449
RPS4X	EPS8L2	14.342
UQCRB	NDUFB2	14.3332
ZMAT2	TMEM141	14.3285
SOD1	PDZK1IP1	14.3199
FOS	MT2A	14.3165
KLF6	MINOS1	14.3054
PAX8	GOLGA8B	14.3009
UBB	PDZK1IP1	14.2971
RPL6	PTPRM	14.2939
FOSB	PNRC1	14.2917
UQCRB	TMEM256	14.2866
UBB	NDUFV2	14.2858
ATF4	EIF3F	14.2782
TFEC	EGFR	14.2701
SOX4	PNRC1	14.265
RPS10	RPS16	14.2442
ZBTB20	MT-CO1	14.2435
EGR1	MT-ATP6	14.2416
JUNB	KLF6	14.2343
RPS4X	KCNJ16	14.2193
ZNF490	FUT11	14.2038
JUNB	MT-CO1	14.2032
RPS4X	SLC39A14	14.2021
PRDX5	LGALS2	14.1957
EGR1	MT-CO1	14.1918
PLAGL1	AC159540.1	14.1849
CANX	HSP90B1	14.1848
CLK1	IL6ST	14.1808
ENO1	ITM2B	14.1787
HSF4	SLC16A1-AS1	14.1671
ZBTB16	SERPINA1	14.1461
RPS4X	POLR1D	14.1459
RPS4X	APOC1	14.1445
SOD1	PPP1R14D	14.1287
EZR	RTN4	14.1163
RPS4X	AHNAK	14.1159
NUCB1	CALR	14.1102
UQCRB	RPL7	14.105
JUNB	BTG1	14.0991
UBB	KLF6	14.0933
EGR1	NDUFC1	14.093
RPL6	GLTSCR2	14.0884
PKM	CNDP2	14.0702
HSPA5	PDIA3	14.0667
SOD1	VMP1	14.0636
RPS4X	ERBB3	14.0523
UBB	ATP6V1F	14.0496
YY1	KHK	14.0492
PAX8	RPS4X	14.0421
PAX2	RPL41	14.0386
RFX1	TPPP3	14.0338
UBB	NSA2	14.0147
RPS10	RPL31	14.0045
HOXB3	HUWE1	13.9988
UQCRB	MIF	13.9921
UBB	PRDX1	13.9884
UBB	NAA38	13.9832
ATF4	CCNI	13.9773
YY1	GAL3ST1	13.9719
SOX4	MT-ND2	13.9696
YBX1	EIF3E	13.9577
JUN	DNAJB1	13.9548
ZBTB16	NEAT1	13.9542
UQCRB	ATP5O	13.9524
RPS4X	UQCRQ	13.9516
DAB2	S100A6	13.9463
RPS4X	HSP90AB1	13.9361
JUNB	HSP90AB1	13.936
NME1	DUSP23	13.9328
UBB	GLYAT	13.9296
ENO1	RPS27	13.9213
UQCRB	RPS24	13.9213
PAX8	PAX2	13.9118
HNRNPA1	RPS20	13.9028
ATF4	EIF4B	13.8973
UBB	MT-CO3	13.8868
UBB	GSTA2	13.8766
PRDX5	PEBP1	13.8701
RPS4X	GATM-AS1	13.8617
RPS4X	ITGB8	13.8597
HNRNPA1	RPS23	13.8431
RPS4X	CFH	13.8329
IRX6	NXPH4	13.8219
ENO1	ANGPTL4	13.8166
UQCRB	COX6A1	13.8135
RPS10	RPL37	13.8097
ZNF256	FCGR2B	13.7973
ZNF71	ARHGEF38	13.7876
FOS	CCDC146	13.786
UBB	PRAP1	13.7858
JUN	MT-ATP6	13.7808
EGR1	DUSP1	13.7681
SPI1	HLA-DRB5	13.7651
ATF6B	RPS20	13.7574
EZR	HLA-A	13.746
RPS4X	POLR2L	13.7321
UQCRB	NAA38	13.7164
UQCRB	FTH1	13.7116
UBB	USMG5	13.7075
ATF4	EIF4A2	13.6988
AKR1A1	SLC17A3	13.6808
ENO1	HLA-DRA	13.6736
ZBTB20	GOLGB1	13.6683
RPL6	COX6B1	13.6677
TPI1	PRDX3	13.6622
UQCRB	ANGPTL4	13.6502
PKM	PGK1	13.6363
ZNF90	MT2A	13.6351
PAX8	RNF213	13.6163
ATF6B	RPS15	13.6151
EGR1	SOCS3	13.6124
SOD1	COX6C	13.6095
SOD1	MPC2	13.6086
ZNF440	NHS	13.6053
KLF6	MIF	13.5944
NAP1L1	RPS5	13.5928
EDN1	SOX4	13.5894
KLF6	ERRFI1	13.588
HNRNPA1	EIF3E	13.5874
RPL35	NACA	13.5853
UBB	SLC25A37	13.5801
RPS10	RPL24	13.5797
EZR	GPX4	13.5769
UQCRB	EEF2	13.5767
POU5F1	SNRNP70	13.5668
AGMAT	NAT8	13.5476
ZNF320	RPLP0	13.5467
PAX2	RPL3	13.545
UQCRB	SERF2	13.5437
SOD1	ATP5J	13.543
UBB	POLR2L	13.5341
PAX8	APOL1	13.5325
SNRPB2	TMEM258	13.5202
CNOT4	HOXA-AS2	13.5186
ZBTB16	AKAP9	13.5163
RPS10	RPL34	13.5161
UQCRB	RPL36A	13.5094
GPD1	HP	13.4993
SOD1	GSTA1	13.4991
ZBTB16	VEGFA	13.499
SOD1	MALAT1	13.4849
RPS4X	TBCA	13.4822
HNF4A	ACSM2A	13.4695
JUNB	TSC22D1	13.4659
UBB	RBP5	13.4582
SOX4	COX7B	13.4541
HNRNPA1	RPL8	13.4536
ZNF687	ZNF701	13.4501
PAX8	RPL21	13.4431
ETFB	LYG1	13.4372
JUNB	MT-ND3	13.4343
ENO1	ALDOA	13.433
RPS4X	EEF1B2	13.4235
TPI1	PGAM1	13.4226
ATF6B	RPL27A	13.417
KLF6	MT-ND5	13.4086
GPD1	ANGPTL3	13.4044
RPS4X	RP11-284H18.1	13.3806
JUNB	C19orf33	13.3806
EZR	CTSB	13.3803
AKR1A1	RBP5	13.3745
HNRNPA1	RPL35A	13.3647
KLF6	COX7B	13.3642
RUFY3	TRIO	13.3632
UQCRB	MT-CO1	13.3622
ZBTB20	RPL36	13.3543
ENO1	PGAM1	13.3532
RPS10	RPL18	13.3519
PLAGL1	SLC38A2	13.3492
RPS10	ZFAS1	13.3419
RPL35	RPL15	13.3372
KLF6	MT1G	13.3236
HNRNPA1	RPL18	13.3191
ELF3	LINC00969	13.3089
EZR	HERPUD1	13.308
JUN	DDX5	13.2957
YBX1	VDAC1	13.2847
RPS4X	TOMM20	13.2819
RPS10	RPL6	13.2781
RPS4X	MTRNR2L12	13.2774
TPI1	ATP5B	13.2651
TFEC	C11orf54	13.2539
ZNF320	RPS4X	13.2509
UBB	LAMTOR5	13.2498
RPS4X	RASSF4	13.2469
UQCRB	NDUFB4	13.2437
ZNF687	SH3GL1	13.2425
HNRNPA1	RPS7	13.2405
UQCRB	RPS26	13.2393
UQCRB	RNF181	13.2385
KLF6	CCNL1	13.2196
RPL6	C1orf186	13.2064
AKR1A1	SMIM24	13.1982
YBX1	SNX3	13.1948
RPL6	RPL17	13.187
NME1	CD2AP	13.1868
PKM	RTN4	13.1863
PRDX5	ADIRF	13.1809
MSRA	NPR3	13.1808
RPS4X	MT1H	13.1605
FOSB	DNAJB1	13.1599
RPS4X	ROMO1	13.1572
UQCRB	NOP10	13.1545
JUNB	MYADM	13.1507
DAB2	PEBP1	13.143
UBB	DNPH1	13.1348
YWHAE	PDIA3	13.1275
ETFB	UBB	13.1271
KLF6	ZFP36	13.1192
RPL6	UQCR11	13.112
RPS4X	MGST2	13.1113
JUNB	C3	13.1031
FOSB	RHOB	13.0964
ANXA1	TGFBI	13.0927
RPS4X	TIPIN	13.0919
UQCRB	NDUFA2	13.0862
KLF6	RPS24	13.0854
SMARCC1	NR2F2-AS1	13.0788
KLF6	VEGFA	13.0755
RPS4X	NDUFB9	13.0737
UBB	MT-CO1	13.0705
RPS4X	SOD2	13.0394
ZNF90	DARS	13.0392
RPS4X	CDH6	13.0372
ATF3	PPP1R15A	13.0348
TPI1	PPDPF	13.0327
RPL35	SEC61G	13.0306
ENO1	NNMT	13.019
UQCRB	RPL31	13.0135
ETFB	ESD	13.0122
YWHAE	SEC11A	13.0113
HNRNPA1	RPL32	12.9939
HNRNPA1	RPL28	12.9923
ATF4	EEF2	12.9878
UBB	H2AFJ	12.9876
SNRPB2	TSPAN1	12.9868
EZR	ACAA2	12.9859
RPS4X	PRDX1	12.9828
DAB2	BBOX1	12.9647
RPL35	CST3	12.9621
EZR	PDZK1	12.9601
RPS4X	HAUS7	12.9595
HIRIP3	ATF4	12.9593
NAP1L1	GDI2	12.9587
ENO1	RPL7	12.9473
TCF7L1	ARHGEF10L	12.9411
PLAGL1	RPL34	12.9374
RAB2A	C16orf13	12.9364
MDM2	CP	12.9304
RPS4X	ATP5I	12.9256
SOX4	GFM2	12.9073
HSF4	RPS23	12.8993
UBB	SUB1	12.8835
PRDX5	ATOX1	12.8728
EGR1	SAA1	12.8728
UQCRB	RPL38	12.8674
PATZ1	C8orf76	12.8672
ILF2	HSP90AA1	12.8644
FOSB	YBX3	12.8631
RAN	NDUFS6	12.8606
SOD1	REG1A	12.859
RPL35	RPL17	12.853
SOX4	TXNIP	12.8474
RPL6	DDX17	12.8473
RPS10	SUMO2	12.8469
SOX4	MT-CO1	12.8455
ZNF594	POLR3D	12.8367
JUNB	CCDC146	12.8365
SOX4	ATP5E	12.8335
HNRNPA1	RPS12	12.8272
RPL6	TOMM7	12.8271
SOD1	USMG5	12.8257
AFF4	SLC4A4	12.8243
TFCP2L1	SH3BP2	12.813
ZNF90	RPL13	12.8114
RPL35	MALAT1	12.8106
SOD1	ECH1	12.8085
JUN	TXNIP	12.799
RPL6	PPDPF	12.795
SMARCC1	TTC28	12.7798
FOS	ATP5I	12.7779
EZR	POLR2E	12.7703
UQCRB	SRP14	12.7661
JUNB	SRSF7	12.7652
SOX4	SMIM24	12.7646
CEBPB	LGALS1	12.7643
HNRNPA1	RPL41	12.7622
MLXIP	STK35	12.7562
ENO1	RPL3	12.7551
RPS4X	RHOC	12.7385
HNRNPA1	RPS19	12.7338
EZR	GAL3ST1	12.7275
ENO1	RPSA	12.7246
RPS10	LY6E	12.7245
PDS5A	AC006227.1	12.7228
SOD1	ALDOA	12.7185
PLAGL1	RNF213	12.7165
SOD1	MT1G	12.7117
RPS4X	VPS13A	12.7071
UQCRB	COX6B1	12.7002
MSI2	MYO9A	12.6927
CEBPD	VEGFA	12.6923
SNRPB2	GSTA2	12.6877
DAB2	MAOB	12.6871
TPI1	DSTN	12.6785
ZNF85	SLC9A6	12.6757
UQCRB	COX6C	12.6737
RPS4X	HLA-DPB1	12.6698
SOX4	SLC25A37	12.6678
UBB	MT2A	12.6675
RPS4X	HSPA1A	12.667
EZR	TMEM27	12.6639
P4HB	C3	12.6609
HSF4	ANKRD36	12.656
ENO1	AC090498.1	12.6552
RPL35	NEAT1	12.6525
ELF3	CDHR5	12.6478
RPS10	RPS23	12.6374
ZKSCAN1	RPL8	12.6323
ZNF708	AASDH	12.6276
SOD1	COX8A	12.6269
ZNF649	FAM213B	12.6185
ZNF90	MT3	12.6104
UBB	ROMO1	12.6044
RPL35	RPL36AL	12.5993
FOSB	PCBP1	12.5986
SOD1	NDUFB2	12.5958
FOS	ADIRF	12.5905
NFATC1	TPPP3	12.5904
CEBPB	MT-CO3	12.5867
RPS10	RPL14	12.5799
RPL35	MT1F	12.5789
FOS	SERTAD1	12.5734
RPS4X	BEX1	12.5722
BAX	SLC25A3	12.5721
ZBTB16	GNB2L1	12.5595
FOS	TUBA1A	12.5499
UQCRB	HRSP12	12.5452
EZR	PPIB	12.5347
ATF4	TMEM123	12.5329
RPL35	TOMM7	12.5305
YBX1	MRPL51	12.5204
SOD1	HINT1	12.5178
UBB	UFC1	12.5156
EGR1	MT-CO3	12.5076
RPL6	RPSA	12.4956
KLF9	NFIC	12.4902
SOX4	C12orf75	12.485
ENO1	P4HB	12.4814
PRDX5	NDUFB7	12.4801
VAMP3	UBE2V1	12.4796
YWHAE	ATP6V1G1	12.4765
SOD1	UBL5	12.4692
UBB	PSMA2	12.4662
SOX4	MPC2	12.465
TAGLN2	S100A11	12.4639
RPL6	VIM	12.462
RPL35	TPI1	12.4561
SOD1	KRT19	12.4532
METTL14	MAP4K4	12.4508
ZBTB20	RPS8	12.4459
UQCRB	NDUFA4	12.44
ENO1	RPL8	12.437
ZNF320	RPS15A	12.435
PRDX5	POLR2L	12.4333
UQCRB	NGFRAP1	12.4327
MAGOH	EIF3I	12.4246
ZBTB20	MT-ND4	12.4211
PRDX5	NDUFB9	12.416
SOD1	DPY30	12.4122
AKR1A1	GSTA2	12.4113
AKR1A1	TMEM27	12.4107
FOS	SLC25A6	12.3972
RUFY3	RPL28	12.3901
SOD1	TSPAN1	12.3826
ENO1	TUBA1B	12.3814
RPL6	POLR2J3	12.3696
RPL6	LDHA	12.3652
ZSCAN26	MEF2A	12.3627
RPS10	COX7A2	12.3561
ZBTB20	MT-ND4L	12.3534
CANX	MT-ND4L	12.3517
RPS4X	H3F3A	12.3505
MAX	RABGGTB	12.3479
SNRPB2	C16orf13	12.3448
RPL6	MT3	12.3443
CEBPB	FXYD2	12.3392
RPL35	MYL12B	12.3378
ATF4	VAMP2	12.3369
YY1	SAR1A	12.3095
EGR1	H3F3B	12.3014
UBB	AC090498.1	12.3012
EZR	PFKP	12.3006
ZNF451	RPL36	12.292
TPI1	RPS5	12.2864
KLF6	PRRC2C	12.2857
UQCRB	RPL34	12.2836
JUN	ZFAND5	12.2732
POU5F1B	PURA	12.2692
UBB	ATP5G3	12.2674
RPS4X	ZNF248	12.2508
UBB	PRDX5	12.2485
RPS4X	PPDPF	12.2386
KLF6	UBB	12.2356
ZNF385D	INADL	12.2331
SOD1	LGALS2	12.2219
JUN	CDKN1A	12.2186
GADD45A	CEBPB	12.2118
ATF6B	AC159540.1	12.2101
PRDX5	NDUFC1	12.2079
RBBP9	ANGPTL3	12.2014
ZBTB20	MT-ND5	12.1891
MYRF	TLR3	12.187
POLI	MYO9A	12.1858
CEBPB	PHLDA3	12.1848
RPS4X	UBC	12.1774
P4HB	PSAP	12.1681
HSF4	RPL3	12.1563
CAT	FCGRT	12.1537
NUCB1	PFKP	12.1499
AKR1A1	ATOX1	12.1492
HLF	CFAP69	12.149
RPS4X	COX7C	12.148
POU5F1B	TFCP2L1	12.1442
SOX9	PRAP1	12.1306
FOS	TGFBI	12.1292
ZNF451	EIF3J-AS1	12.129
UBB	YBX1	12.1286
CEBPB	CYB5A	12.1251
PLAGL1	RPS28	12.1244
CEBPB	DUSP1	12.1215
UBB	BLOC1S1	12.1208
FOS	ATP5E	12.1173
CEBPD	EPB41L4A-AS1	12.1119
JUNB	UBC	12.0977
PRDX5	PCBD1	12.0976
UBB	DYNLL1	12.0967
RPS4X	HP	12.0891
APEX1	CMBL	12.0869
SNAPC5	DCTN6	12.0847
TPI1	PARK7	12.0837
UBB	EDF1	12.0836
KLF6	JUN	12.0834
CEBPB	MT-ND4L	12.0788
PAX2	ANPEP	12.0663
TAGLN2	TGFBI	12.0543
ZNF708	CYP4F3	12.0505
PAX2	RPS20	12.0345
ZNF320	RPL15	12.0332
CEBPD	ADM	12.0276
EGR1	HCFC1R1	12.0273
UBE2K	CFAP69	12.0153
UBB	DNAJC19	12.0135
CEBPB	TXNIP	12.013
UBB	TMEM176A	12.0116
KLF6	N4BP2L2	12.0095
ZNF320	RPS14	12.0059
PAX8	RPS12	12.0052
SRP9	RNF149	12.0046
EZR	CD151	12.0025
TBP	MTRF1L	11.9978
ENO1	RPL13A	11.9952
HSPA5	P4HB	11.9932
ENO1	RPS2	11.99
ENO1	HNRNPK	11.9898
RPL6	CUTA	11.9811
FOS	SRSF7	11.976
JUNB	EIF4A2	11.9744
HSPA5	LMAN1	11.9664
RPS10	RPL5	11.9586
RPL35	COX7C	11.9564
JUN	JUND	11.9562
IRX6	PCK1	11.9557
PKM	ACTB	11.9436
PAX8	NBL1	11.9372
RPL35	CTSD	11.9361
HLX	RP11-16E12.1	11.9354
BRCA1	FEM1C	11.9348
EZR	TMCO1	11.9342
EZR	PGRMC1	11.9311
DLX4	RP11-16E12.1	11.9302
BNC2	HUWE1	11.9251
ENO1	MT3	11.9221
TPI1	NDUFA4L2	11.9219
RPS4X	PARP14	11.9117
KLF6	CYB5A	11.911
UBB	ATP5E	11.9008
HNRNPA1	TPT1	11.9004
TAGLN2	TIMP1	11.9002
YWHAE	RAD23A	11.8995
TP73	TCF7L1	11.8964
RPL35	RPSA	11.8886
TAGLN2	KRT19	11.8856
RPS4X	S100A10	11.8806
AKR1A1	MT1X	11.8793
HNRNPA1	SLC25A6	11.8735
TAF1	CHD2	11.8734
UBB	CHCHD2	11.8723
RPL6	UQCRH	11.8703
RPL35	VIM	11.8654
EZR	HSPB1	11.8591
KLF4	APOC1	11.8555
RPL6	GSTP1	11.8532
HNRNPA1	RPS3A	11.8502
SRP9	TMBIM4	11.8432
ENO1	GSTP1	11.8425
SOD1	ATP5J2	11.8337
RPL35	UBB	11.8324
SOD1	EIF3I	11.8299
UBB	COA4	11.8291
SOD1	BLOC1S1	11.8245
HSPA5	SLC3A1	11.8244
UBB	ATP5J	11.8229
RPS4X	LDHB	11.8189
ELF3	RRBP1	11.8162
TPI1	UBB	11.8126
RPS4X	SUB1	11.8117
RPS4X	SOX4	11.8106
YBX1	NEAT1	11.8059
UQCRB	HLA-C	11.8031
UBB	EIF3I	11.8012
UBB	CSTB	11.7967
JUNB	RBP5	11.7824
UBB	LYG1	11.7759
ZBTB20	MT-CYB	11.7687
RPL35	EIF3E	11.7668
ZNF594	MET	11.7635
JUN	NEAT1	11.7593
RPS4X	GABARAP	11.7529
ZNF19	SOX9	11.7456
UQCRB	DYNLL1	11.7454
ZNF320	FN3K	11.7374
ENO1	MT1X	11.731
EGR1	CTD-3252C9.4	11.7199
RPL35	LGALS3	11.711
PRDX5	FABP3	11.71
RPS4X	SEC61G	11.7084
ZNF320	RPL12	11.704
ENO1	PSMB1	11.7006
PAX2	POLR2J3	11.6964
ZNF320	VPS13A	11.6931
FOS	S100A6	11.6903
UBB	COX5A	11.6895
RPS10	RPL29	11.6889
CHD2	POLR2J3	11.6832
PKM	PGAM1	11.6803
P4HB	SELM	11.6795
CEBPB	ANGPTL4	11.6793
ZNF248	C1orf186	11.6787
ZBTB20	KLF6	11.6753
ELF3	SNHG9	11.6745
RPL6	ATP5I	11.6738
PRDX5	ECH1	11.6711
CD59	CREG1	11.668
TAGLN2	WFDC2	11.6664
PAX8	DDX17	11.6645
ZNF25	PDCD10	11.6626
EZR	BCAP31	11.6612
SOD1	PLOD2	11.6602
ZNF195	SLC38A2	11.6587
JUNB	ATF3	11.6574
P4HB	HSP90B1	11.6523
RPS4X	CLDN7	11.6492
UBB	TCEB2	11.648
RAN	NDUFA6	11.6434
SOD1	PSMA1	11.6389
HNRNPA1	RPL36	11.6322
RPL6	NSA2	11.6316
HNRNPA1	RPL39	11.6251
SOX4	MT-ATP6	11.6242
GTF2I	IL6ST	11.62
UBB	C1S	11.6105
PAX2	RPS2	11.6071
FOS	RPL36AL	11.6009
CEBPD	SERPINA1	11.5907
ENO1	ANXA2	11.5866
ELF3	ANPEP	11.5835
RPS4X	FAM50A	11.5665
PAX8	REG1A	11.5631
PAX8	CLU	11.5601
TPI1	MYL6	11.5577
ENO1	RPL13	11.5564
SNRPB2	KRTCAP2	11.5559
PAX2	RPL26	11.5539
TPI1	RPL8	11.5532
JUN	MT-ND3	11.5497
RPL6	N4BP2L2	11.5449
NONO	EIF1AX	11.5417
PAX8	ABCC3	11.5405
UQCRB	ATP5L	11.5402
NUCB1	EZR	11.5396
RPL35	PPDPF	11.5236
UBB	COX6A1	11.5233
NAP1L1	RPS21	11.5183
RPS10	RPS19	11.5173
CEBPB	NEDD9	11.5103
RPL35	FKBP5	11.5049
NUCB1	MTDH	11.5024
A1CF	USH1C	11.5002
JUN	KLF6	11.4981
FOS	COX6C	11.4936
ZBTB20	CEBPD	11.4923
ZBTB20	RP11-553L6.5	11.4893
RPS10	RPS2	11.4846
CEBPB	C12orf75	11.482
RAN	PGAM1	11.4814
SNRPB2	GABARAP	11.4776
JUNB	UGT2B7	11.4733
RPS4X	ATF6B	11.4719
PAX8	RPS6	11.4705
RPS10	COMMD6	11.4631
ZNF146	UTP4	11.4562
RPS4X	RSL1D1	11.4545
AKR1A1	MGST2	11.4487
RPS4X	ADSSL1	11.4445
CREB5	SORBS2	11.4395
KLF6	FUS	11.439
ZBTB20	EEF1A1	11.4386
VEZF1	IL6ST	11.4381
RPL35	MT1X	11.4367
KLF6	SLC16A3	11.436
ENO1	HSP90AA1	11.4344
HNRNPA1	RPL15	11.4322
RPS10	RPL10A	11.4315
HIST1H2BN	ZBTB7B	11.4247
RUFY3	RPS15A	11.4225
UQCRB	MT-ND1	11.4206
ZBED1	RSRC2	11.4177
RPS4X	CIRBP	11.4166
UBB	MPC2	11.4126
TPI1	RPL5	11.4123
PRDX5	GPX4	11.4113
HSF4	RPL39	11.4074
UQCRB	RPL37	11.4041
SOX4	MCL1	11.402
NR1H4	CMBL	11.3955
UQCRB	CMBL	11.3908
JUNB	NOL3	11.3901
UQCRB	CD24	11.39
PRDX5	MRPL23	11.3877
RPL35	SUMO2	11.3828
KLF6	MTRNR2L8	11.3819
ZNF90	RPS5	11.3771
HIST1H2BN	LINC00342	11.3758
RPL6	TBCA	11.3736
UBB	OST4	11.3646
UQCRB	CCNI	11.361
TIMM44	TMEM9	11.355
PAX8	SAA1	11.3483
UQCRB	FKBP5	11.3399
SOX4	CD200	11.3379
PRDX5	HINT2	11.3268
JUNB	ATF4	11.321
PAX8	C3	11.3203
CHD2	RPL35	11.3083
TPI1	MALAT1	11.2976
ZSCAN18	XIST	11.2866
RPL6	ALDOA	11.2837
NFIA	RTN4	11.2761
SOX4	SAA1	11.2685
RPS10	NEAT1	11.265
RPS10	RPL11	11.2619
RPS10	EIF3J	11.261
ENO1	VKORC1	11.2579
RPS10	COX8A	11.2471
ZNF486	TIGD7	11.2468
UBB	MT-ND1	11.2441
ZXDC	PRMT1	11.2393
CEBPB	TUBA1A	11.2352
UQCRB	RPL19	11.2333
PAX8	CDHR5	11.2301
RPS10	MALAT1	11.2265
RPL35	EDF1	11.2207
IRF8	HLA-DQB1	11.2184
JUNB	MT1G	11.2124
ZNF625	DNTTIP2	11.2124
ZNF765	SNX13	11.1974
ZNF611	RPL19	11.1971
PAX2	AKAP9	11.1896
SP110	ACTR10	11.1895
KIF22	ANXA4	11.1874
MSRA	CMBL	11.1806
KLF4	FOS	11.1784
JUNB	HNRNPA0	11.1765
ZNF320	RPS16	11.173
ENO1	SEC61G	11.1713
HOXD9	TPPP3	11.1678
FOS	NFKBIA	11.1648
PKM	RAC1	11.1629
RPL35	ACSM2A	11.1626
RPS4X	SRP14	11.1622
CERS2	SERPING1	11.1614
EZR	CLDN7	11.1583
SOD1	KRTCAP2	11.1527
SOD1	MYL12B	11.1479
SOX4	MT-CO2	11.1471
SOD1	SNHG25	11.1451
PAX8	PTPRM	11.1451
RPS10	TPT1	11.1443
PAX8	SLC6A8	11.141
RAB2A	NDUFB7	11.1398
RPS4X	HLA-A	11.1338
P4HB	PDLIM1	11.1321
SOX4	ROMO1	11.1313
UQCRB	RPL9	11.1292
RPS10	NPM1	11.1195
FOXO1	TMEM245	11.1194
ZNF189	KARS	11.1176
UQCRB	NAT8	11.1161
ZNF141	ZNF830	11.111
STAT3	KLF6	11.1094
RPL6	EIF3E	11.1093
PAX8	SLC34A2	11.1067
UQCRB	ATP5J2	11.1064
ZNF605	GPBP1	11.1043
P4HB	SEC62	11.1018
SOX4	MT-ND1	11.1007
RPS4X	MST1	11.0991
HNRNPA1	RPS15A	11.099
ENO1	PGRMC1	11.0975
KLF6	ATPIF1	11.094
UQCRB	UBL5	11.0934
JUN	MT-ND4	11.0874
CNOT4	CLIP1	11.0847
HNRNPA1	RPL7A	11.0818
ZFP90	BCAM	11.0817
PAX2	RPS19	11.0772
FOS	ZFAND5	11.0746
GRHPR	KHK	11.0738
RPS4X	EIF4A2	11.0708
RPS10	ZNF90	11.0666
ZNF320	C1orf186	11.0664
FOS	RHOB	11.0577
PKM	PFKP	11.0516
EMX2	DPY30	11.0514
ENO1	DARS	11.0499
PAX8	SDC1	11.0428
KLF4	CEBPB	11.0417
RPL35	COX5B	11.0391
CEBPB	WSB1	11.0374
HMGB1	PDZK1IP1	11.0372
IRF8	HLA-DRB5	11.0306
AKR1A1	ANGPTL3	11.0306
SOX4	MT-ND4	11.0293
LTF	SLPI	11.0292
HIVEP1	RAD50	11.0211
HNRNPA1	RPL10A	11.018
FOS	SLC44A4	11.0177
EZR	BHMT	11.0128
JUN	SERPINA1	11.0093
RPS10	RPL37A	11.0076
ZNF532	B4GALT5	10.999
ZBTB20	GATM-AS1	10.995
NUCB1	CD151	10.9919
SOX4	C11orf54	10.989
RPS10	RPL7A	10.9858
JUNB	SNHG25	10.9814
RPS4X	SNCG	10.9705
SOD1	DYNLL1	10.9685
SOX4	NAT8	10.9676
SOX4	SAA2	10.9655
RPS4X	DSTN	10.9621
CREBZF	ATF6B	10.9616
SF3B1	DHX36	10.9596
UBB	DPY30	10.9564
RPL6	HLA-A	10.9544
EDN1	MTRNR2L8	10.9517
ZNF90	RPS3	10.9517
UQCRB	VAMP8	10.9491
RPS4X	ARGLU1	10.9391
FOS	RPS4X	10.9353
RPL6	YBX1	10.9339
RPL35	UQCRB	10.9278
H2AFZ	RAN	10.9266
ZBTB20	TGOLN2	10.9265
UBB	NPM1	10.9262
ZHX3	ZNF320	10.9259
GTF2I	PARD6B	10.9245
CREBZF	RSRP1	10.9221
RPL35	ANP32B	10.9211
AGMAT	SMIM24	10.9183
SOD1	COX7C	10.913
E2F4	OSMR	10.9104
RPS4X	CD70	10.9072
UQCRB	RPL35A	10.9024
CEBPB	HILPDA	10.8994
ENO1	PDK4	10.8926
SOX4	EDN1	10.8912
RPL35	USMG5	10.8882
PRKAA2	TTC3	10.8871
RPL6	APOC1	10.882
ZNF90	PABPC1	10.8795
EZR	SLC37A4	10.8775
ENO1	SLPI	10.8749
UBB	NOP10	10.8736
ENO1	RPL11	10.8697
PRDX5	TRMT112	10.8669
RPS10	RPL32	10.8613
GAR1	NEFL	10.8611
HNRNPA1	RPL31	10.8584
RPS4X	SYTL2	10.858
NUCB1	LAMP1	10.8535
RBM8A	PSMD2	10.8522
RPS4X	MUC1	10.8521
ZNF302	TIPIN	10.8467
ZBTB20	MT-ND2	10.8465
ZRSR2	HNRNPL	10.8465
ATF3	CTD-3252C9.4	10.8434
FOS	PPP1R14D	10.8424
RPS4X	EGFR-AS1	10.8348
RAN	PPIB	10.8285
ZBTB16	RASSF4	10.8283
ENO1	CAV1	10.8267
ZNF90	CAV1	10.8239
YY1	DNAJC4	10.8231
PRDX5	PPDPF	10.8224
PRDX5	CUTA	10.8169
SRP9	VAMP8	10.8164
TPI1	GUK1	10.8117
PRKAA2	RPL26	10.8117
JUNB	CTD-3252C9.4	10.8097
JUNB	MT-CO3	10.8049
ENO1	EGLN3	10.8034
ETFB	AKR1C3	10.7994
RPS10	SNRPE	10.7895
AGMAT	AGXT2	10.7866
RPS4X	KIF12	10.7797
UBB	ATPIF1	10.7791
PAX8	LINC00969	10.7782
CEBPB	MT-ND4	10.7775
PAX8	RPS27	10.7769
ENO1	CCNI	10.775
ZNF320	RPS27	10.7672
PAX2	RPL13A	10.7664
PRDX5	TCEB1	10.7658
ETS1	NOL11	10.7649
EZR	CRYZ	10.7648
UQCRB	S100A13	10.7625
ZBTB20	N4BP2L2	10.7619
EZR	LAPTM4A	10.7501
SOX4	PMP22	10.7479
EEF1D	DAD1	10.7449
RPL35	EEF1D	10.7445
ELF3	GAL3ST1	10.7438
NAP1L1	FAM213A	10.7431
HOXA7	CNP	10.7408
TAGLN2	MT1G	10.736
UQCRB	RPS23	10.7358
RPS10	RPLP1	10.7336
ARID5B	CALD1	10.7254
PRDX5	COX5B	10.7232
GLYCTK	RP11-380J14.1	10.722
UBB	C19orf33	10.7172
KLF9	FHL1	10.7167
ATF4	PNRC1	10.7161
SOD1	MZT2A	10.7132
CEBPB	NGFRAP1	10.7103
ZNF254	NOSIP	10.7055
KLF6	TXNIP	10.7046
UQCRB	OCIAD2	10.6987
PAX8	TMED9	10.6974
KLF6	PDK4	10.6974
PRDX5	BNIP3L	10.6959
CANX	MRPL23	10.6947
UBXN1	HNRNPK	10.6939
AR	ARHGAP29	10.6882
PKM	ANXA4	10.6861
FOS	RPL21	10.6802
RPL35	C1orf186	10.6747
DAB2	GPX3	10.6747
RPS4X	JUNB	10.6698
SOD1	PRDX3	10.6657
UBB	ATOX1	10.6655
PAX8	DOC2A	10.6572
ZBTB16	ZBTB20	10.6551
SOD1	ATP6V1F	10.6515
ELF3	HSF4	10.6501
TAGLN2	SERPING1	10.6446
ZNF320	RPS15	10.6443
SOD1	APRT	10.6422
HNRNPA1	RPS16	10.6405
ENO1	NOL3	10.6338
KLF6	LINC01320	10.6312
SALL1	EPS8	10.627
JUNB	KLF4	10.6217
ZNF541	GSTA2	10.6198
FOSB	S100A1	10.6189
CEBPB	SLC25A37	10.6181
HSPA5	SLC16A3	10.6165
EEF1D	ATP5F1	10.6159
RPL35	NDUFA4L2	10.615
RPL35	CNDP2	10.6093
PAX2	OXR1	10.6093
ZFP14	NR2F2-AS1	10.6092
SOX4	PLOD2	10.6085
NELFA	SLC5A3	10.6047
EGR1	APOC1	10.598
TPI1	PRDX6	10.5956
SOX4	CA12	10.5937
EGR1	CEBPB	10.5919
SOX4	BBOX1	10.5892
TPI1	CHMP2A	10.589
HNRNPA1	RPLP0	10.579
HSPA5	TMEM59	10.5769
HHAT	ESYT1	10.5665
ZNF320	SASH1	10.5619
YBX1	VDAC2	10.559
ENO1	FTH1	10.5589
RNF114	HPS4	10.5515
SOX4	EDIL3	10.549
DAB2	CRYAB	10.547
RPS4X	PKHD1	10.5455
KLF6	ZFAND5	10.5447
PKM	AKR1C3	10.5424
NONO	MRPS18B	10.5285
ARNTL2	SPI1	10.5263
TPI1	CXCL14	10.5203
BNC2	ANKLE2	10.5159
TAGLN2	C5orf46	10.5149
ZBTB20	SORBS2	10.5091
HNRNPC	YWHAZ	10.5087
STAT2	VTA1	10.5032
TPI1	LAMTOR5	10.5028
PKM	BHMT	10.5008
ZNF90	RPL18	10.5
UBB	ADI1	10.4998
RPS4X	NT5C3B	10.4979
PAX8	RPS14	10.493
SOD1	DBI	10.4884
RPS4X	RSL24D1	10.4856
ZNF414	RUNX1	10.4827
ENO1	SSR2	10.4806
GTF2I	HIPK2	10.4797
FOSB	SRSF5	10.4784
RPS4X	LYG1	10.4772
SOX4	ZNF90	10.4761
TPI1	NNMT	10.4739
[truncated: 1,046,576+ more rows]
